# Supplementary material for: Ceruloplasmin correlates with immune infiltration and serves as a prognostic biomarker in breast cancer
Source: Aging (Albany NY). 2021 Aug 19;13(16):20438–67. doi: 10.18632/aging.203427 (PMC8436892; doi:10.18632/aging.203427)
Supplement: Supplementary Table 1 [file aging-13-203427-s002.xlsx]

## Sheet: GSEA_KEGG
Supplementary Table 1. GSEA results demonstrate the ceruloplasmin-associated signaling pathways based on KEGG and Reactome analyses in BRCA.
GSEA_KEGG
ID	Description	setSize	enrichmentScore	NES	pvalue	p.adjust	qvalues	rank	leading_edge	core_enrichment
hsa05200	Pathways in cancer	373	0.297713	1.93017	0.00105374	0.00747549	0.00489953	4057	tags=46%, list=33%, signal=32%	4233/5337/3459/3455/1956/3576/1906/355/3914/3570/83439/3601/1021/8326/3595/27436/3600/23566/221357/3091/5578/5743/330/1612/83593/3574/3592/8900/3918/2950/5293/5336/6932/6934/1286/650/2939/3718/7475/112399/5371/4851/113/5727/6608/3559/4257/6502/3815/238/2247/59345/7852/637/3460/26291/817/80326/3575/1439/5292/54583/5295/81029/3561/2938/5156/2034/2113/10000/898/7474/25780/108/1871/3566/8324/7042/431…
hsa04060	Cytokine-cytokine receptor interaction	233	0.491175	3.03876	0.00109529	0.00747549	0.00489953	2905	tags=53%, list=23%, signal=42%	27242/9180/6374/2919/3459/3455/6364/3556/3576/355/3570/6376/58191/3601/146433/3595/9966/7850/2921/3600/3976/8740/3574/3592/3604/6347/8808/6372/650/1230/2920/6355/26525/53833/8200/10673/8809/9235/8792/3559/3627/3553/3588/7132/7124/284340/5197/7852/3460/3575/6354/1439/9466/6352/651/3561/8797/6362/10663/3606/6351/10913/8807/3566/958/7042/5008/6357/1234/3569/7046/3554/6373/8795/10563/943/7133/6367/40…
hsa05166	Human T-cell leukemia virus 1 infection	178	0.328756	1.96249	0.00112867	0.00747549	0.00489953	2942	tags=39%, list=24%, signal=30%	3383/4316/64764/3601/3112/7850/3600/8900/5293/3718/8061/3108/3134/113/3559/9519/2114/7132/3133/7124/9586/3106/5295/3689/3561/2113/10000/567/898/108/5971/3122/1871/958/7042/3109/3569/3932/7046/3554/4049/9020/3105/3123/920/917/3117/1437/915/916/3113/3560/4791/811/6688/2005/1111/545/3107/8829/6722/3683/5290/3111/292/472/4775/1029/3127/64682
hsa05163	Human cytomegalovirus infection	166	0.315342	1.86248	0.00114025	0.00747549	0.00489953	4180	tags=50%, list=34%, signal=34%	1956/3576/355/3570/64764/6376/1021/5578/5743/115004/6347/5293/1230/3134/6891/113/6890/3553/3588/7132/3133/7124/59345/9586/7852/637/3106/6352/5295/5156/10000/567/6351/108/1871/5734/1234/3569/3554/51806/9475/3105/6774/91860/3587/5579/2770/356/5880/811/5608/3107/6654/5290/4775/6348/1029/3690/5534/23236/5330/3135/2793/6009/54205/109/54331/6892/841/5332/55970/3456/3685/3716/2185/3446/2932/1499/5594/46…
hsa04062	Chemokine signaling pathway	156	0.351173	2.05662	0.00114286	0.00747549	0.00489953	2902	tags=42%, list=23%, signal=32%	6374/4067/2919/6364/3576/6376/58191/2921/6347/5293/6372/1230/2920/3718/399694/6355/113/3627/59345/5197/7852/6354/6352/5295/6362/10000/10663/6351/2268/108/1794/6357/1234/653361/6373/9475/10563/6367/6774/6369/9844/3702/5579/3055/2770/6375/6772/5294/5880/6846/2829/7409/4283/1233/729230/23533/7454/6773/6654/5290/1236/1237/10803/6348/2833
hsa05132	Salmonella infection	156	0.312554	1.83045	0.00114286	0.00747549	0.00489953	2301	tags=33%, list=19%, signal=28%	7097/10333/834/3576/83439/6281/8767/837/197259/330/338382/6932/6934/60/302/3553/7132/7124/5063/8797/10000/23643/3606/10095/3654/10092/929/3569/5788/2316/8795/9475/329/3071/5606/3839/10392/83547/2597/7100/58484/9367/8743/3840/838/10810/10627/23118/4615/27128/5608/10109
hsa05152	Tuberculosis	141	0.414546	2.39726	0.00115207	0.00747549	0.00489953	3919	tags=59%, list=32%, signal=41%	1051/7097/3929/3459/64581/10333/7096/3112/8767/4261/3592/1520/3108/3656/64127/3553/3588/7132/7124/26253/637/3460/817/972/718/3689/50617/10000/8877/64170/3606/3122/10892/1379/7042/3654/3109/1378/929/3569/51806/91860/2207/3123/2213/3587/3552/3920/3684/3687/3117/30835/4360/3458/6772/843/3113/4615/1509/815/2214/11151/8844/2212/3111/3127/3586/2215/3119/3593/2209/3115/5534/5993/7099/54106/54205/841/685…
hsa05167	Kaposi sarcoma-associated herpesvirus infection	141	0.328629	1.90041	0.00115207	0.00747549	0.00489953	3990	tags=49%, list=32%, signal=34%	3383/1827/4067/2919/3459/3455/3576/355/1021/2921/3091/5743/5293/5336/1230/2920/3134/2247/7132/3133/59345/637/3106/5295/718/441925/10000/9641/23710/942/1871/1234/3569/51806/3105/6774/91860/9976/3055/1437/6772/5294/5608/1233/64422/23533/3107/131450/6773/5290/1237/4775/7187/5610/5534/7098/3135/2793/54205/54331/841/55970/6850/3456/3716/3446/2932/1499/5594
hsa05130	Pathogenic Escherichia coli infection	138	0.349084	2.01209	0.00115875	0.00747549	0.00489953	3709	tags=48%, list=30%, signal=34%	9076/10686/4067/834/8440/3576/355/4651/4690/837/4643/60/7277/23562/3553/7132/7124/9071/5063/8797/3606/10095/3654/10092/84617/3569/3554/283446/8795/9475/3071/55971/7456/2597/7100/3055/356/8743/10810/23118/4615/9075/27128/84790/10109/2534/3059/3688/2212/114548/4542/9073/57121/9181/10006/4627/51807/7099/81027/5861/8735/54205/840/841/64005/8936
hsa05169	Epstein-Barr virus infection	148	0.412916	2.39052	0.00116009	0.00747549	0.00489953	3233	tags=50%, list=26%, signal=37%	3383/7097/4067/3455/355/864/3112/965/1021/8900/7128/5293/5336/3718/3108/3134/6891/3627/6890/6502/3133/7124/637/3106/5295/10000/567/9641/898/5971/3122/1871/958/3654/7431/3109/3569/1380/5606/9020/3105/4794/6774/3123/919/917/3117/915/916/6772/3113/695/23118/4615/4791/811/5608/4939/3107/6773/930/956/3683/5290/1647/3111/3127/3066/7187/5713/3119/5610/894/3115
hsa04621	NOD-like receptor signaling pathway	128	0.393259	2.23052	0.00118624	0.00747549	0.00489953	2601	tags=39%, list=21%, signal=31%	2919/2633/3455/834/3576/10135/3428/8767/2634/837/2921/330/84674/6347/7128/2920/115362/114769/10010/9447/64127/3553/7124/6352/440068/64170/3606/9641/23710/3569/24145/1536/329/199713/115361/10392/58484/1508/9474/6772/838/23118/118429/4615/55669/9051/4939/4210/114548/6773
hsa05164	Influenza A	128	0.425719	2.41463	0.00118624	0.00747549	0.00489953	3990	tags=56%, list=32%, signal=39%	3383/3459/3455/834/3576/355/3112/1021/4261/5578/3592/6347/5293/3108/60/7113/5371/3627/3553/7132/7124/5646/637/3460/64135/6352/5295/8797/10000/3606/9641/3122/3109/91543/3569/9021/8795/3123/5579/3552/402569/3117/356/8743/3458/6772/3113/4615/4939/114548/6773/55916/5290/3111/4599/292/3127/7187/3119/3593/5610/3115/7098/7099/5611/54205/841/3456/5340/3716/3446/5594
hsa05202	Transcriptional misregulation in cancer	128	0.332778	1.88748	0.00118624	0.00747549	0.00489953	3216	tags=40%, list=26%, signal=30%	1051/8842/4233/2120/3576/597/7850/330/8900/2119/7113/5371/85414/30012/64919/3002/51513/3486/3695/7490/942/958/929/3569/604/4314/3684/1437/4211/7185/5079/5328/3560/3206/6688/1436/2005/4286/8013/2118/4353/860/1647/472/2308/3066/4094/221037/4318/2209/894
hsa04145	Phagosome	119	0.39777	2.23407	0.00119474	0.00747549	0.00489953	4499	tags=66%, list=36%, signal=43%	7097/64581/10333/715/7037/3112/8685/338382/1520/245973/3108/60/3134/7277/6891/4688/6890/3133/3106/718/3689/50617/29927/3122/3109/84617/929/653361/2204/1536/1514/3105/3123/83547/2213/3920/3684/3117/30835/4360/4689/3113/811/84790/1780/2214/11151/3107/3688/2212/4353/3111/949/3127/2215/3119/2209/51807/3690/3115/8417/7099/3135/81027/4973/1535/3685/4481/526/3678/78989/4074/10381/23545/7058/9902/4842/31…
hsa04630	JAK-STAT signaling pathway	119	0.389604	2.18821	0.00119474	0.00747549	0.00489953	3591	tags=50%, list=29%, signal=36%	116379/9180/3459/3455/1956/3570/3601/3595/3600/3976/3574/3592/5293/3718/8651/53833/3559/3588/3460/5771/3575/1439/9466/5292/4170/5295/3561/5156/10000/3566/5008/3569/9021/6775/1438/338376/6774/3594/3587/50615/149233/1437/3458/6772/3560/6773/6654/5290/1443/316/3586/2688/3593/894/9655/59067/3596/58985/3597/4352
hsa04514	Cell adhesion molecules (CAMs)	115	0.513119	2.85891	0.00120627	0.00747549	0.00489953	3465	tags=65%, list=28%, signal=47%	1001/3383/9076/10686/79679/3112/965/9019/3696/80380/3108/5817/3134/941/23562/2734/3133/7412/29851/3106/9071/6382/201633/3689/3695/64115/29126/50848/942/3122/958/10666/3109/3897/5818/5788/1493/926/3105/3123/923/914/3684/5133/920/927/3117/6693/6383/9672/940/3113/9075/23705/6402/6614/3107/3688/3683/3680/959/57502/3111/3127/9073/25945/22854/3119/6404/3115/23114/6401/3135/925/5792
hsa05206	MicroRNAs in cancer	116	0.332785	1.85578	0.00120627	0.00747549	0.00489953	5236	tags=68%, list=42%, signal=40%	4233/1946/1956/1545/1021/54541/5578/3371/5743/5962/6768/5293/5336/5268/399694/8651/4851/85414/2744/5292/4170/5295/5156/6624/1945/898/1871/7042/7431/4363/8434/6774/5579/10253/4853/5328/994/1942/6654/5290/472/1029/3066/10642/4318/894/3690/9839/3162/9759/1591/8626/5594/7168/3678/1789/3845/6659/89780/8091/9493/3236/1944/5604/6464/6541/4082/4790/9134/1870/993/2146/113130/578/6093/5598/1398/4609/960
hsa04380	Osteoclast differentiation	104	0.473475	2.60135	0.00121065	0.00747549	0.00489953	2685	tags=53%, list=22%, signal=42%	3459/3455/140885/5293/5336/8061/8651/8792/353514/4688/3553/11025/7132/7124/3460/5295/10288/10000/5971/126014/79168/7042/3932/7046/3554/9021/653361/2274/1540/3937/10859/10326/11006/9020/2213/3552/4982/55423/4689/3458/6772/695/23118/4791/8600/6688/5608/1436/2534/4286/1435/2214/2212/6773/5290
hsa05162	Measles	107	0.339715	1.86824	0.00121507	0.00747549	0.00489953	4905	tags=60%, list=39%, signal=37%	4478/7097/3455/355/1021/3592/7128/5293/3718/3559/3553/637/64135/5295/3561/10000/9641/898/3654/3569/6504/6774/2213/3552/9367/917/30835/356/915/916/940/6772/23118/4615/3560/1459/4939/6773/5290/4599/7187/3593/5610/894/7099/54106/54205/841/3456/3716/3446/2932/868/51284/6776/1965/3445/6885/4792/4790/103/4940/23586/9134
hsa04650	Natural killer cell mediated cytotoxicity	108	0.459753	2.53049	0.00121803	0.00747549	0.00489953	4180	tags=66%, list=34%, signal=44%	3383/3459/3455/154064/355/79465/5578/80328/80329/5293/5336/399694/353091/3002/3133/7124/637/3460/5551/3106/5295/135250/3689/8797/3824/3932/8795/3937/51744/3805/3812/3105/2207/3821/5579/962/919/9437/1437/356/10870/8743/4068/3458/5880/7409/2534/2214/3107/3683/6654/5290/3802/22914/2215/3804/5534/3135/7535/117157/7305/6850/3456/27040/3811/2185/3446/5594/3384/259197/3845
hsa04064	NF-kappa B signaling pathway	87	0.516414	2.74649	0.001221	0.00747549	0.00489953	3016	tags=60%, list=24%, signal=46%	3383/3929/8837/4067/2919/3576/597/2921/5743/330/8740/7128/5336/2920/10673/8792/3553/7132/7124/5588/7412/23643/6351/10913/5971/10892/958/3654/6357/929/3932/3554/1540/329/4049/9020/5579/7185/695/23118/5328/4615/4791/8600/1459/959/1647/472/84433/4050/7187/23085
hsa04217	Necroptosis	101	0.339317	1.84898	0.001221	0.00747549	0.00489953	2611	tags=37%, list=21%, signal=29%	8837/3459/3455/834/355/5321/197259/330/824/7128/3718/3553/7132/7124/637/3460/817/8797/81030/2495/1540/1536/6775/8795/329/123745/6774/3552/356/8743/3458/6772/815/11124/114548/6773/5836
hsa04625	C-type lectin receptor signaling pathway	85	0.355518	1.87875	0.00122549	0.00747549	0.00489953	4180	tags=55%, list=34%, signal=37%	64581/834/22800/22808/5743/3592/5293/5336/3553/7124/26253/5295/3659/10000/64170/9641/5971/338339/10892/93978/3569/1540/51806/6367/9020/91860/2207/30835/6772/4791/8844/114548/6773/5290/4775/3586/3593/5534/6361/841/6850/4046/5594/868/1263/805/3845
hsa04659	Th17 cell differentiation	85	0.455536	2.40729	0.00122549	0.00747549	0.00489953	2219	tags=47%, list=18%, signal=39%	3459/3556/3570/3112/3091/3718/3108/3559/3553/5588/3460/9466/3561/3662/3122/3566/196/3109/3569/3932/7046/3554/4794/6774/3594/3123/50615/919/920/149233/917/3117/915/30009/916/3458/6772/50943/3113/3560
hsa04061	Viral protein interaction with cytokine and cytokine receptor	90	0.590694	3.15433	0.00122699	0.00747549	0.00489953	2905	tags=67%, list=23%, signal=51%	6374/2919/6364/3576/3570/6376/146433/2921/8740/6347/6372/1230/2920/6355/53833/8809/3559/3627/3588/7132/7124/5197/7852/6354/6352/3561/8797/6362/3606/6351/8807/6357/1234/3569/6373/8795/10563/7133/6367/4049/8793/6369/3587/6375/8743/6846/3560/51554/2829/1436/4283/1233/729230/1435/1236/1237/10803/6348/2833/3586
hsa05145	Toxoplasmosis	90	0.426691	2.27855	0.00122699	0.00747549	0.00489953	3233	tags=53%, list=26%, signal=40%	7097/3459/3914/3112/4261/330/3592/3918/3108/8651/3588/7132/7124/3460/10000/23643/3122/958/7042/3654/284217/3109/1234/329/5606/6774/3123/3587/240/2770/3117/3458/6772/3113/5294/23118/4615/5608/23533/3688/959/3111/3127/3586/3915/3119/3593/3115
hsa04668	TNF signaling pathway	95	0.530507	2.86174	0.0012285	0.00747549	0.00489953	2704	tags=55%, list=22%, signal=43%	1051/3383/6374/8837/2919/6364/1906/355/64764/6376/2921/3600/197259/3976/5743/330/6347/7128/5293/6372/2920/8809/4217/3627/64127/3553/7132/7124/9586/7412/6352/5295/3659/10000/3569/9021/329/7133/5606/4049/9020/4314/1437/7185/843/23118/153090/5608/1435/1326/5290/4323
hsa04611	Platelet activation	84	0.388118	2.0467	0.00123305	0.00747549	0.00489953	4165	tags=57%, list=34%, signal=38%	4067/2244/2266/5321/5293/5336/60/2982/113/5500/2243/5295/10000/108/4638/9475/3937/123745/2207/54518/91807/2770/83706/695/10627/5294/340156/2534/23533/3688/2212/2983/5290/5028/3690/5906/23236/10235/5330/5742/5739/109/5332/6850/5594/5584/7408/7094
hsa04660	T cell receptor signaling pathway	84	0.369529	1.94867	0.00123305	0.00747549	0.00489953	2905	tags=45%, list=23%, signal=35%	8440/4690/5293/7124/5588/29851/5295/5063/10000/10892/3932/5788/3937/1493/926/9020/4794/3702/9402/5133/919/920/917/927/1437/915/916/940/3458/7409/2534/1326/6654/5290/959/4775/84433/3586
hsa04658	Th1 and Th2 cell differentiation	71	0.459678	2.3425	0.00124224	0.00747549	0.00489953	3458	tags=61%, list=28%, signal=44%	84441/3459/864/3112/3595/3592/3718/3108/4851/3559/5588/3460/3561/3122/3566/3109/3932/6775/4794/3594/3123/919/920/917/3117/915/30009/916/3458/6772/4853/3113/3560/3111/4775/3127/4094/3119/3593/3115/5534/3596/7535
hsa04670	Leukocyte transendothelial migration	82	0.4091	2.14123	0.00124224	0.00747549	0.00489953	2685	tags=43%, list=22%, signal=34%	3383/9076/4478/10686/5578/83593/5293/5336/60/23562/4688/87/7852/7412/9071/5295/3689/50848/653361/1536/9475/3702/5579/3684/2770/4689/10627/5880/9075/7294/7409/7414/3688/3683/5290
hsa05150	Staphylococcus aureus infection	73	0.527951	2.70147	0.00124224	0.00747549	0.00489953	3876	tags=73%, list=31%, signal=50%	3383/25984/3868/715/1672/716/2266/3112/3426/3872/3866/3108/125115/3857/718/3689/717/2359/5724/3122/2358/3109/2204/3123/2213/1828/3861/390792/3684/3117/3113/2357/2214/2212/3683/3111/728/3127/3885/3586/2215/3119/6404/2209/3115/5648/3075/712/719/714/713/629/5340
hsa04066	HIF-1 signaling pathway	75	0.426275	2.1866	0.00124378	0.00747549	0.00489953	2254	tags=43%, list=18%, signal=35%	3459/1956/1906/5214/3570/2023/7037/7018/3091/5578/5293/5336/284/112399/5163/5209/3460/817/54583/5295/10000/3939/3101/3569/1536/6774/2597/5579/5230/92483/3458/80201
hsa05146	Amoebiasis	83	0.43696	2.28989	0.00124378	0.00747549	0.00489953	3420	tags=54%, list=28%, signal=40%	7097/2919/3576/3914/7850/2921/5578/3592/3918/338382/5293/1286/2920/6318/3553/87/5272/7124/5295/3689/7042/6317/284217/929/3569/3554/1285/5579/3684/1437/3458/732/7414/909/2774/5290/2769/5273/3586/3915/3593/384/23236/5330/7099
hsa05323	Rheumatoid arthritis	77	0.519471	2.68317	0.00124533	0.00747549	0.00489953	2881	tags=61%, list=23%, signal=47%	3383/6374/7097/2919/6364/3576/3112/2921/3600/6347/6372/2920/245973/284/3108/10673/8792/941/3553/7124/6352/3689/50617/3606/942/3122/7042/4312/3109/3569/1493/1514/4314/3123/3552/3117/1437/940/3458/3113/8600/1435/3683/3111/6348/4050/3127
hsa04620	Toll-like receptor signaling pathway	78	0.429469	2.22384	0.00124688	0.00747549	0.00489953	4789	tags=68%, list=39%, signal=42%	7097/3929/3455/10333/3576/7096/3592/5293/3627/941/3553/7124/6696/6352/5295/10000/23643/6351/9641/942/958/3654/929/3569/6373/5606/51311/7100/6772/23118/4615/5608/4283/1326/5290/6348/7187/3593/7098/7099/54106/841/3456/3446/5594/51284/1432/3445/353376/5604/6885/4792/4790
hsa04657	IL-17 signaling pathway	70	0.505504	2.56856	0.00125	0.00747549	0.00489953	2176	tags=46%, list=18%, signal=38%	1051/6280/3934/6374/2919/6279/6364/3576/2921/5743/6278/6347/7128/6372/2920/8061/3627/3553/7124/338324/6354/9641/4312/3569/5596/4314/727897/1437/23765/10758/3458/23118
hsa04666	Fc gamma R-mediated phagocytosis	74	0.396451	2.02753	0.00125156	0.00747549	0.00489953	3205	tags=49%, list=26%, signal=36%	5337/4067/4651/5321/3985/5578/5293/5336/5295/274/10000/8877/10095/1794/10092/653361/5788/3984/123745/2213/5579/3635/3055/10810/5880/10109/7409/50807/2214/7454/2212/5290/2215/8613/1073/2209
hsa05142	Chagas disease (American trypanosomiasis)	79	0.440412	2.28256	0.00125156	0.00747549	0.00489953	3990	tags=62%, list=32%, signal=42%	7097/8837/3459/10333/3576/355/3592/6347/5293/3553/7132/7124/3460/6352/5295/718/10000/7042/3654/5521/3569/7046/919/2770/917/356/915/916/3458/4615/811/2774/5290/2769/6348/3586/3593/23236/5330/712/7099/714/54106/713/841/5332/3456/7048/5594
hsa04640	Hematopoietic cell lineage	80	0.556986	2.89198	0.00125313	0.00747549	0.00489953	3233	tags=68%, list=26%, signal=50%	3570/7037/966/3112/7850/3574/3108/4311/3559/3553/3815/7124/952/3575/924/3122/3566/1379/3109/1378/929/3569/3554/1604/1380/926/1438/3123/3552/914/3684/920/917/927/3117/1437/100133941/915/916/3113/951/1436/909/1435/921/930/945/3111/3127/931/3119/2209/3690/3115
hsa04662	B cell receptor signaling pathway	69	0.370141	1.86987	0.00125628	0.00747549	0.00489953	2855	tags=43%, list=23%, signal=34%	4067/118788/27071/5293/5336/353514/11025/5295/10288/10000/25780/79168/10892/10859/1380/11006/4794/2213/5579/3635/971/974/695/5880/7409/930/6654/5290/4775/84433
hsa04750	Inflammatory mediator regulation of TRP channels	69	0.379215	1.91571	0.00125628	0.00747549	0.00489953	1746	tags=35%, list=14%, signal=30%	3556/59341/5321/5578/79054/5293/5336/113/3553/5500/5588/817/5295/3269/108/5734/3554/51806/5606/123745/91860/2150/5579/3356
hsa05235	PD-L1 expression and PD-1 checkpoint pathway in cancer	72	0.414423	2.10639	0.00125628	0.00747549	0.00489953	2284	tags=42%, list=18%, signal=34%	7097/3459/1956/27436/3091/5293/238/116071/5588/3460/5295/55509/10000/29126/3932/5606/4794/6774/5133/919/920/917/915/916/940/3458/6772/4615/1459/5608
hsa04612	Antigen processing and presentation	63	0.524103	2.58126	0.00126904	0.00747549	0.00489953	3452	tags=65%, list=28%, signal=47%	3112/4261/1520/3108/3134/6891/6890/5641/3133/7124/3106/972/567/3824/3122/3109/926/3805/10437/1514/3812/3105/3123/3821/920/1508/927/3117/3458/3113/811/3107/3111/3127/3802/3804/3119/3115/5993/3135/925
hsa05140	Leishmaniasis	63	0.524461	2.58303	0.00126904	0.00747549	0.00489953	3233	tags=67%, list=26%, signal=50%	7097/3459/3112/5743/3592/3108/4688/3553/7124/3460/718/3689/3122/1379/7042/3654/3109/1378/653361/1536/3123/5579/3552/3684/3117/4689/3458/6772/3113/23118/4615/2214/3688/2212/3111/3127/3586/2215/3119/3593/2209/3115
hsa04610	Complement and coagulation cascades	57	0.498097	2.41656	0.00128535	0.00747549	0.00489953	3876	tags=67%, list=31%, signal=46%	722/2244/715/716/2266/966/5329/3426/710/2243/718/3689/717/5055/1379/1378/1604/1380/5265/2/3684/3687/725/11326/5328/2153/732/5627/728/3078/5648/3075/712/719/714/713/629/5340
hsa05321	Inflammatory bowel disease (IBD)	58	0.575399	2.79019	0.00128535	0.00747549	0.00489953	3434	tags=74%, list=28%, signal=54%	7097/3459/3112/3595/3592/3108/8809/64127/3553/7124/3460/3561/3606/8807/3122/3566/7042/3109/3569/6775/6774/3594/3123/7100/3552/50615/149233/3117/30009/3458/6772/50943/3113/3111/3127/3586/4094/3119/3593/3115/7099/59067/3596
hsa05133	Pertussis	56	0.51863	2.51095	0.00129366	0.00747549	0.00489953	3672	tags=68%, list=30%, signal=48%	6374/722/834/3576/715/716/3592/710/6372/3553/7124/3659/718/3689/717/23643/3654/929/3569/51806/10392/91860/3394/3552/3684/2770/725/4615/3688/114548/3586/3593/1073/712/7099/714/713/840
hsa05416	Viral myocarditis	51	0.537024	2.53205	0.00130378	0.00747549	0.00489953	3687	tags=71%, list=30%, signal=50%	3383/1525/3112/1756/3108/60/3134/941/3133/637/5551/3106/3689/942/3122/958/284217/3109/1604/3105/3123/3117/940/3113/5880/2534/3107/3683/959/3111/3127/3119/3115/3135/54205/841
hsa05134	Legionellosis	45	0.475176	2.17669	0.00132275	0.00747549	0.00489953	2232	tags=47%, list=18%, signal=38%	7097/2919/834/3576/2921/3592/2920/3553/7124/718/3689/3606/1379/1378/929/3569/7100/3684/58484/4615/4791
hsa04672	Intestinal immune network for IgA production	37	0.613333	2.68038	0.00132802	0.00747549	0.00489953	4498	tags=95%, list=36%, signal=61%	3601/3112/3600/5284/3108/10673/941/7852/29851/3695/942/3122/958/3109/3569/9020/3123/3117/940/3113/57379/959/3111/10803/3127/3586/3119/3115/3676/608/4055/56477/115650/23495/3118
hsa05332	Graft-versus-host disease	37	0.679037	2.96752	0.00132802	0.00747549	0.00489953	3446	tags=92%, list=28%, signal=67%	355/3112/3108/3134/941/3553/3002/3133/7124/5551/3106/3824/942/3122/3109/3569/3812/3105/3123/3821/3552/3117/356/940/3458/3113/3107/3111/3127/3802/3804/3119/3115/3135
hsa05144	Malaria	42	0.552331	2.47855	0.00132979	0.00747549	0.00489953	3613	tags=69%, list=29%, signal=49%	3383/4233/7097/3576/3592/6347/3553/7124/7412/6382/3689/3606/1379/958/7042/1378/3569/6383/3458/4615/3683/959/3586/22914/2995/6401/7099/54106/3820
hsa04940	Type I diabetes mellitus	39	0.591837	2.60321	0.00134953	0.00747549	0.00489953	3446	tags=79%, list=28%, signal=58%	355/3112/3592/3108/3134/941/3553/3002/3133/7124/5551/3106/942/3122/3109/4049/3105/3123/3552/3117/356/940/3458/3113/3107/3111/3127/3119/3593/3115/3135
hsa05320	Autoimmune thyroid disease	39	0.56195	2.47175	0.00134953	0.00747549	0.00489953	3446	tags=72%, list=28%, signal=52%	355/3112/3108/3134/941/3002/3133/5551/3106/942/3122/958/3109/1493/3105/3123/3117/356/940/3113/3107/959/3111/3127/3586/3119/3115/3135
hsa05330	Allograft rejection	33	0.692965	2.93015	0.0013587	0.00747549	0.00489953	3446	tags=94%, list=28%, signal=68%	355/3112/3592/3108/3134/941/3002/3133/7124/5551/3106/942/3122/958/3109/3105/3123/3117/356/940/3458/3113/3107/959/3111/3127/3586/3119/3593/3115/3135
hsa05143	African trypanosomiasis	32	0.562533	2.34443	0.00138313	0.00747549	0.00489953	3728	tags=75%, list=30%, signal=53%	3383/355/3620/5578/3592/3553/7124/7412/3606/169355/3569/2150/8542/5579/356/3458/4615/3586/3593/23236/5330/6401/54106/5332
hsa05340	Primary immunodeficiency	32	0.624004	2.60062	0.00138313	0.00747549	0.00489953	3458	tags=81%, list=28%, signal=59%	4261/3718/6891/6890/100/3575/29851/3561/958/3932/5788/926/920/927/915/916/695/930/57379/959/5896/973/5993/64421/925/7535
hsa04216	Ferroptosis	31	0.524409	2.17313	0.00138696	0.00747549	0.00489953	3579	tags=65%, list=29%, signal=46%	1356/55240/51703/5621/7037/2182/7018/6303/2495/1536/2180/23516/94033/9474/2512/64116/3162/23305/23657/2730
hsa05310	Asthma	23	0.569583	2.16655	0.00144718	0.00767004	0.00502704	3434	tags=74%, list=28%, signal=54%	3112/3108/7124/3122/958/3109/2207/3123/3117/3113/959/3111/3127/3586/3119/3115/3596
hsa04392	Hippo signaling pathway - multiple species	17	0.607051	2.09756	0.00152905	0.00797112	0.00522437	4346	tags=88%, list=35%, signal=57%	25937/54798/83937/8463/10413/26524/60485/7004/9770/4771/55233/84962/6788/126374/7005
hsa05205	Proteoglycans in cancer	151	0.29884	1.74231	0.00229358	0.0113644	0.0074484	2740	tags=34%, list=22%, signal=27%	4478/4233/7097/1956/355/22800/22808/5329/8326/3091/5578/5962/5293/5336/7475/10855/60/5727/6608/5500/2247/7124/817/80326/5295/81029/858/6382/10000/7474/8324/7042/2316/9475/1514/6774/5579/356/6383/5328/117581/51196/867/7409/8323/815/3059/3688/6654/5290/1839
hsa04360	Axon guidance	141	0.30069	1.73884	0.00230415	0.0113644	0.0074484	2860	tags=38%, list=23%, signal=30%	4233/1946/8440/4690/3985/1969/56963/5578/5293/5336/2051/2047/5727/6608/91653/5163/3983/7852/817/5295/5063/81029/1945/7474/5361/3897/9475/3984/2048/6259/2770/2049/223117/9723/1808/10627/5880/6091/64221/655/2534/815/1942/8829/3688/5290/9423/8482/2050/55740/25791/4775/10507/2043
hsa04510	Focal adhesion	141	0.291076	1.68325	0.00230415	0.0113644	0.0074484	2712	tags=34%, list=22%, signal=27%	4233/1956/3914/3696/5578/3371/330/3918/824/5293/1286/399694/60/87/5500/1299/7791/6696/3694/5295/5063/858/5156/3695/10000/4638/284217/5923/2316/9475/329/1285/5579/1729/91807/64098/10627/5880/256076/340156/7409/7414/2534/3691/3688/6654/5290/3680
hsa04210	Apoptosis	103	0.332553	1.82848	0.00240674	0.0113644	0.0074484	2351	tags=36%, list=19%, signal=29%	8837/355/597/1075/330/1520/824/5293/60/7277/4217/3002/7132/8739/7124/1515/637/5551/1439/4170/5295/8797/10000/8795/329/1514/9020/1508/1522/356/7185/8743/843/1509/153090/84790/1521
hsa05418	Fluid shear stress and atherosclerosis	103	0.329489	1.81164	0.00240674	0.0113644	0.0074484	1714	tags=29%, list=14%, signal=25%	3383/445/1906/59341/7850/221357/2950/6347/5293/2939/60/4217/4688/4257/3553/7132/7124/7412/5562/5295/858/6382/2938/10000/3554/653361/51806/1514/91860/3552
hsa04390	Hippo signaling pathway	102	0.323363	1.76882	0.00242718	0.0113644	0.0074484	4491	tags=55%, list=36%, signal=35%	25937/83439/8326/330/6932/6934/650/7475/60/8463/8200/7159/154796/10413/5500/80326/81029/3689/7474/8324/7042/26524/5521/7046/60485/329/7004/85407/655/8323/6591/656/654/1490/4771/7533/55233/8321/84962/894/392255/7476/1739/7472/6788/2736/2932/7048/1499/126374/5584/286204/89780/7005/7481/2246
hsa05160	Hepatitis C	107	0.313889	1.72621	0.00243013	0.0113644	0.0074484	5480	tags=64%, list=44%, signal=36%	9076/10686/8837/3455/1956/355/5465/1021/5293/3627/23562/7132/7124/637/9071/5295/10000/9641/1871/5521/91543/9021/6774/356/3646/3458/6772/9075/4939/6773/6654/5290/4599/949/9073/7533/7187/5610/7098/54205/841/3456/3716/10062/3446/2932/1499/1950/5594/137075/3845/1965/3445/5604/4792/5010/4790/4940/23586/1870/578/3454/4609/3441/8554/9074/1017/8503
hsa05135	Yersinia infection	92	0.32843	1.755	0.00248139	0.011436	0.00749527	5322	tags=65%, list=43%, signal=38%	834/3576/6347/5293/60/10096/6197/3553/7124/5295/10000/3606/3654/2533/3569/3932/9475/3937/5606/7456/3984/23118/5880/4615/5608/7409/4210/7454/3688/114548/10097/5290/4775/3586/8935/7099/7535/8395/2335/3456/3676/27040/2185/2932/5594/3678/1432/4772/5604/57180/6885/4792/4790/644150/6093/1398/3558/3725/4773/653857
hsa04151	PI3K-Akt signaling pathway	231	0.271608	1.67792	0.00329308	0.01496	0.00980497	1376	tags=22%, list=11%, signal=20%	9180/4233/1946/7097/3455/1956/3914/3570/64764/118788/1969/1021/5523/54541/3696/23566/5578/3371/3574/3918/5293/1286/3718/284/6446/3559/3815/2069/2247/59345/1299/9586/26291/6696/3575/5562/3694/1128/4170/5295/3561/5156/3695/10000/1945/898/3566/5008/284217/5521/3569
hsa04810	Regulation of actin cytoskeleton	152	0.289605	1.68725	0.00344432	0.0150906	0.00989059	2777	tags=34%, list=22%, signal=26%	4478/1956/22800/22808/3985/3696/1730/5962/50649/5293/60/87/5500/2247/7852/26291/3694/1128/5295/5063/3689/5156/3695/10095/4638/10092/9475/3071/3984/1729/91807/3684/3687/2252/2250/7114/10627/5880/1131/10109/340156/7409/7414/3691/3688/3683/6654/5290/3680/55740/2254
hsa05131	Shigellosis	155	0.284663	1.66323	0.00344432	0.0150906	0.00989059	2599	tags=33%, list=21%, signal=26%	1956/834/3576/58528/8767/837/824/115004/5293/5336/60/3553/87/7132/7124/5588/6352/5295/718/7321/441925/10000/3606/23710/10095/3101/10892/10092/929/3554/64121/9475/10392/92610/9844/7100/1729/58484/23048/1437/9474/10627/23118/4615/80201/10109/51196/7414/3059/3688/114548
hsa04015	Rap1 signaling pathway	150	0.287875	1.67294	0.0034642	0.0150906	0.00989059	4180	tags=47%, list=34%, signal=32%	4233/1946/136/1956/22808/1969/23683/23566/5578/83593/5293/284/60/113/3815/2247/26291/5295/3689/5156/10000/1945/25780/108/2904/2533/51806/3937/5606/91860/54518/5579/3684/2770/2252/9732/2250/5880/2357/5608/51196/1436/7409/1435/1942/3688/3683/5290/5028/55740/2254/57121/5587/3690/2903/5906/23236/10235/5330/109/5332/27040/1499/1950/5594/2889/5584/7408/805/7094/3845
hsa00601	Glycosphingolipid biosynthesis - lacto and neolacto series	22	0.53681	2.01272	0.00441176	0.0189587	0.0124257	4357	tags=77%, list=35%, signal=50%	6489/2525/84002/10331/10402/2526/2651/10690/2529/2683/2528/53947/8707/8702/79369/28/10317
hsa05170	Human immunodeficiency virus 1 infection	155	0.282951	1.65323	0.00459242	0.0194719	0.0127621	4180	tags=48%, list=34%, signal=33%	7097/355/3985/5578/115004/5293/5336/3134/6891/6890/7132/3133/7124/59345/7852/637/3106/25939/27350/5295/5063/10000/567/3654/1234/51806/7133/5606/3105/3984/91860/5579/85363/919/920/2770/917/356/915/916/23118/5880/4615/200315/811/5608/130340/1111/545/3107/5290/472/4775/8905/1073/140564/5534/162/7099/3135/60489/2793/54205/54331/6892/841/55970/3456/2185/3446/5594/340061/164668/805/3845
hsa04218	Cellular senescence	128	0.289396	1.64142	0.00474496	0.0198539	0.0130125	3216	tags=39%, list=26%, signal=29%	3576/22800/59341/22808/1021/83593/8900/677/824/5293/3134/678/5500/3133/3106/5295/3486/2113/10000/898/1871/7042/3569/7046/51806/5606/3805/3105/91860/3552/10758/5933/5608/1111/545/3107/4361/1874/5290/1647/292/472/4775/1029/3802/2308/3804/286826/3364/894
hsa05012	Parkinson disease	83	-0.363118	-2.37884	0.00505051	0.0208579	0.0136705	2250	tags=41%, list=18%, signal=34%	7314/4707/4712/4729/10476/498/506/374291/4722/4708/4728/4724/1351/4705/4714/291/84701/51079/842/513/4702/4698/1350/10975/65018/4716/4717/1337/4696/11315/4695/517/1345/4701
hsa04974	Protein digestion and absorption	54	0.386946	1.8594	0.00515464	0.0210151	0.0137735	3537	tags=48%, list=28%, signal=35%	59272/6564/8645/117247/3783/1286/4311/1299/5646/120103/1803/9056/1285/206358/1302/85301/483/1358/256076/476/169044/4224/6546/486/153201/1506
hsa04723	Retrograde endocannabinoid signaling	90	-0.27531	-1.84339	0.00534759	0.021371	0.0140068	2287	tags=37%, list=18%, signal=30%	2775/4707/4712/4729/778/2891/374291/4722/4708/4728/4724/4705/4714/776/3708/2783/112/51079/4702/107/4698/4716/2890/5595/4717/51764/4696/2785/2563/4695/3760/4701/2166
hsa00190	Oxidative phosphorylation	86	-0.444832	-2.92325	0.00537634	0.021371	0.0140068	2205	tags=47%, list=18%, signal=39%	4707/4712/4729/10476/498/506/374291/4722/4708/4728/1353/4724/1351/4705/4714/51606/534/84701/533/51079/535/513/4702/4698/1350/10975/155066/527/4716/4717/1337/10063/4696/4695/521/537/9550/517/1345/4701
hsa04014	Ras signaling pathway	159	0.27243	1.59872	0.00570776	0.0222876	0.0146076	2685	tags=32%, list=22%, signal=25%	4233/1946/5337/1956/22800/22808/8437/5321/1969/5578/83593/5293/5336/399694/284/23179/2114/9462/3815/2247/59345/26291/5295/5063/5156/2113/10000/1945/25780/2904/5923/51806/123745/91860/5579/4909/7039/356/22821/2252/2250/5922/5880/51196/1436/1435/8844/1942/26279/6654/5290
hsa00563	Glycosylphosphatidylinositol (GPI)-anchor biosynthesis	17	-0.481762	-1.93774	0.00574713	0.0222876	0.0146076	1844	tags=47%, list=15%, signal=40%	51227/84720/55650/5283/54872/8818/51604/9091
hsa05225	Hepatocellular carcinoma	117	0.292485	1.63911	0.00595948	0.0228327	0.0149648	1391	tags=24%, list=11%, signal=21%	4233/1956/83439/1021/8110/8326/221357/5578/2950/5293/5336/6932/6934/2939/7475/399694/60/4257/80326/5295/81029/2938/10000/7474/1871/8324/7042/7046
hsa04933	AGE-RAGE signaling pathway in diabetic complications	73	0.345243	1.76657	0.00621118	0.0235138	0.0154112	1715	tags=32%, list=14%, signal=27%	3383/3576/1906/5578/6347/5293/5336/1286/3553/7124/7412/5292/5295/10000/7042/3569/7046/1536/1285/6774/5579/3552/1729
hsa04664	Fc epsilon RI signaling pathway	52	0.377732	1.79265	0.00653595	0.0243803	0.0159791	2685	tags=44%, list=22%, signal=35%	4067/5321/5578/5293/5336/7124/5295/10000/241/3937/5606/123745/2207/3635/240/1437/695/5880/5608/7409/2534/6654/5290
hsa05165	Human papillomavirus infection	229	0.246	1.51639	0.00659341	0.0243803	0.0159791	1336	tags=20%, list=11%, signal=18%	84441/3455/1956/355/3914/64764/83439/1021/8326/5523/3696/3371/5743/8900/3918/5293/6932/6934/1286/245973/7475/3134/4851/9519/7132/3133/7124/1299/9586/6696/80326/3106/3694/5295/3659/81029/3695/50617/10000/9641/898/7474/8324/284217/5734/5521
hsa05322	Systemic lupus erythematosus	75	0.33544	1.72066	0.00746269	0.0271702	0.0178077	3657	tags=47%, list=29%, signal=33%	715/716/3112/3108/941/87/7124/718/717/942/3122/958/3109/2904/3123/3117/940/3458/3113/732/2214/2212/959/3111/3127/3586/6737/2215/3119/2209/3115/2903/712/714/713
hsa04714	Thermogenesis	144	-0.262033	-1.96936	0.0075188	0.0271702	0.0178077	2205	tags=34%, list=18%, signal=28%	4707/4712/4729/10476/498/506/5571/374291/493753/4722/4708/7249/4728/1353/4724/1351/4705/4714/64223/84701/57104/2885/112/51241/84335/51079/513/4702/107/4698/1350/10975/4716/25915/9658/3265/148327/4717/5564/1337/51103/10063/28958/4696/4695/521/517/1345/4701
hsa04971	Gastric acid secretion	59	0.359168	1.74286	0.00774194	0.0276622	0.0181301	4367	tags=61%, list=35%, signal=40%	5578/60/113/3759/817/3772/108/4638/51806/3776/91860/5579/887/91807/115111/2770/483/389015/1131/340156/815/3766/476/3773/495/1080/23236/5330/3274/109/5332/3784/805/481/3758/2520
hsa05016	Huntington disease	170	-0.256287	-1.9834	0.00833333	0.0294444	0.0192982	2205	tags=35%, list=18%, signal=29%	4707/1770/4712/89953/55860/4729/10476/8408/498/506/2891/374291/4294/4722/4708/11258/4728/5434/4724/3064/5438/1351/9706/4705/4714/113457/7278/291/160/8678/10383/27113/3708/84701/51079/5441/842/513/56171/51164/4702/4698/64837/1350/10975/4716/2890/148327/4717/1639/3800/1337/4696/4695/112714/517/7802/1345/4701
hsa03420	Nucleotide excision repair	24	-0.383836	-1.761	0.00986842	0.0344853	0.0226021	3604	tags=62%, list=29%, signal=44%	5425/728340/1022/1642/7508/404672/1643/2067/4331/1069/5426/57804/3978/7507/902
hsa05120	Epithelial cell signaling in Helicobacter pylori infection	52	0.362368	1.71974	0.0117647	0.0403464	0.0264435	1554	tags=29%, list=13%, signal=25%	4233/4067/2919/1956/3576/2921/5336/2920/245973/6352/50617/50848/6868/10392/9020
hsa03410	Base excision repair	21	-0.416885	-1.84072	0.0117994	0.0403464	0.0264435	2296	tags=48%, list=18%, signal=39%	7515/4913/79661/5426/4350/57804/3978/4968/27343/23583
hsa04978	Mineral absorption	39	0.399725	1.7582	0.0121457	0.0410888	0.0269301	3509	tags=54%, list=28%, signal=39%	10568/55503/6523/115019/7018/4501/140803/2495/1317/9843/483/4496/26872/492/476/2512/6546/4499/486/3162/493
hsa04920	Adipocytokine signaling pathway	50	0.357239	1.67473	0.0130548	0.0436993	0.0286411	1591	tags=30%, list=13%, signal=26%	51703/5465/2182/53632/7132/7124/5588/5562/10000/9021/7133/2180/10891/4794/6774
hsa05217	Basal cell carcinoma	43	0.370942	1.6728	0.0134048	0.0444035	0.0291026	1250	tags=28%, list=10%, signal=25%	83439/8326/6932/6934/650/7475/5727/6608/80326/81029/7474/8324
hsa04916	Melanogenesis	78	0.312037	1.61576	0.0137157	0.0449649	0.0294705	4637	tags=55%, list=37%, signal=35%	1906/64764/83439/8326/5578/6932/6934/7475/113/3815/817/80326/81029/7474/108/8324/51806/91860/5579/2770/8323/4286/815/8321/1638/7306/23236/5330/7476/109/7472/5443/5332/2932/1499/5594/805/3845/89780/7481/1385/5604/434
hsa00380	Tryptophan metabolism	27	0.431711	1.7319	0.0140845	0.0457028	0.0299542	3059	tags=48%, list=25%, signal=36%	8942/8564/1545/3620/259307/169355/1962/23498/219/6999/316/51166/1644
hsa04520	Adherens junction	56	0.339411	1.64326	0.0155239	0.0498648	0.032682	3990	tags=50%, list=32%, signal=34%	4233/1956/83439/7525/6932/6934/6615/60/87/5818/7046/10810/5880/1459/4008/7414/2534/7454/6591/81607/25945/5792/10580/8936/8826/7048/1499/5594
hsa05161	Hepatitis B	116	0.282404	1.57484	0.0168878	0.0537033	0.0351978	5306	tags=61%, list=43%, signal=35%	7097/3576/355/64764/5578/8900/5293/3718/7124/9586/637/64135/5295/10000/9641/898/1871/7042/3654/3569/7046/6775/5606/6774/5579/356/6772/843/23118/4615/5608/6773/6654/5290/4775/7187/4318/7098/7099/54205/841/3456/3716/2185/3446/7048/5594/468/3845/890/6776/1432/4772/3445/353376/1385/5604/6885/4792/4790/3717/23586/9134/1870/3454/1654/4609/1959/3441/3725/4773
hsa04973	Carbohydrate digestion and absorption	35	0.391136	1.68663	0.0175913	0.0553866	0.036301	3379	tags=54%, list=27%, signal=40%	6523/6518/278/5293/5295/10000/3938/3101/93432/5579/483/277/80201/276/476/5290/23236/5330/486
hsa04623	Cytosolic DNA-sensing pathway	39	0.384085	1.6894	0.0188934	0.0589029	0.0386057	1428	tags=31%, list=11%, signal=27%	834/115004/9447/3627/3553/6352/81030/3606/6351/9641/3569/10622
hsa00500	Starch and sucrose metabolism	25	0.449007	1.75144	0.0200573	0.0619245	0.0405861	2655	tags=52%, list=21%, signal=41%	7360/278/5236/3101/93432/283209/8908/277/80201/2992/276/5836/55276
hsa04310	Wnt signaling pathway	109	0.281311	1.55421	0.0205562	0.0628546	0.0411957	3402	tags=39%, list=27%, signal=29%	4316/6422/83439/22943/8326/5578/11197/6932/6934/7475/8061/4919/59352/817/80326/8549/144165/81029/7474/8324/50964/9475/84870/5579/6259/4040/5880/1459/5467/85407/8323/815/340419/4775/284654/8321/57216/894/5534/23236/5330/147111/7476
hsa04010	MAPK signaling pathway	213	0.232773	1.41872	0.0210643	0.0637947	0.0418118	2879	tags=31%, list=23%, signal=24%	4233/1946/1956/3556/355/22800/22808/5321/1969/1852/5578/284/4217/6197/3553/3815/2069/2247/7132/7124/26291/5156/10000/1945/25780/5971/1849/7042/3654/929/5923/7046/3554/2316/5606/9020/9448/123745/5778/773/5579/3552/4909/7039/356/2252/2250/5922/23118/5880/4615/4791/5608/1436/2005/994/1435/1326/1942/6722/11184/6654/1647/2254/4775/27091
hsa05230	Central carbon metabolism in cancer	51	0.344575	1.62465	0.0221643	0.0664928	0.0435802	1282	tags=29%, list=10%, signal=26%	4233/1956/5214/3091/5293/8140/5163/3815/2744/5295/5156/10000/3939/3101/57103
hsa04260	Cardiac muscle contraction	61	-0.267308	-1.60554	0.0234742	0.0694962	0.0455487	1602	tags=26%, list=13%, signal=23%	1351/27092/776/59283/477/6548/84701/480/786/1350/10975/1337/784/3270/1345/9254
hsa04071	Sphingolipid signaling pathway	82	0.292888	1.53298	0.0236025	0.0694962	0.0455487	2426	tags=33%, list=20%, signal=27%	5337/5523/5578/5293/4217/9294/7132/7124/166929/637/130367/5295/8560/10000/8877/259230/5521/4363/55304/9475/2207/5579/2770/5880/1509/8698/2534
hsa04080	Neuroactive ligand-receptor interaction	207	0.23225	1.40953	0.0257559	0.0741494	0.0485984	3662	tags=38%, list=29%, signal=27%	133/136/1906/2564/2568/2740/23566/51083/165829/9568/1907/6869/5031/9294/64106/3640/5646/55879/1128/718/3269/1139/2359/5724/2358/5737/5734/2904/1394/1138/5540/2150/3356/887/4543/4923/57152/183/4828/59350/2692/5026/2357/1131/553/3001/100996758/22953/8698/27334/1136/1443/797/5028/5746/151/728/2862/6753/117579/2558/2688/2916/9340/2903/2556/1269/5027/2831/2570/5739/719/57105/885/2908/90226/3274/3362
hsa05221	Acute myeloid leukemia	54	0.329602	1.58385	0.0257732	0.0741494	0.0485984	2710	tags=39%, list=22%, signal=31%	83439/597/8900/5293/6932/6934/5371/3815/5292/5295/10000/929/6774/3684/1437/6688/5467/1436/6654/5290/4353
hsa04020	Calcium signaling pathway	130	0.255211	1.45423	0.0258824	0.0741494	0.0485984	3728	tags=43%, list=30%, signal=30%	136/1956/5578/5336/6869/113/7852/952/817/1128/5156/3269/8877/1139/108/6263/5724/5737/4638/5137/444/51806/91860/6261/773/5579/3356/887/91807/4923/5026/1131/553/51196/340156/22953/815/492/57118/2774/2769/292/5260/6546/2903/5534/23236/5027/5330/57105/493/6262/3274/109/3362/5332
hsa01523	Antifolate resistance	22	0.447456	1.6777	0.0294118	0.0835084	0.0547324	3280	tags=55%, list=26%, signal=40%	2348/10257/3553/7124/4363/3569/8836/2352/1244/6472/2618/390243
hsa05223	Non-small cell lung cancer	51	0.327677	1.54499	0.029987	0.0843881	0.055309	1902	tags=31%, list=15%, signal=27%	1956/1021/27436/5578/83593/5293/5336/3718/238/5295/10000/1871/5915/6774/5579/7039
hsa03320	PPAR signaling pathway	50	0.324791	1.52262	0.035248	0.0983235	0.0644424	1830	tags=30%, list=15%, signal=26%	51703/5465/2182/123/2173/51129/4199/1622/5360/4312/2171/2180/9415/33/1962
hsa04721	Synaptic vesicle cycle	58	-0.259783	-1.56004	0.0357143	0.0987578	0.064727	1495	tags=26%, list=12%, signal=23%	51606/6812/160/534/533/535/10814/155066/6857/527/6844/8775/9550/10815/5864
hsa00052	Galactose metabolism	20	0.447881	1.62687	0.0385757	0.105321	0.0690283	2843	tags=55%, list=23%, signal=42%	5214/7360/5236/3938/3101/93432/80201/2683/55276/57016/3906
hsa04970	Salivary secretion	70	0.298599	1.51724	0.03875	0.105321	0.0690283	2661	tags=37%, list=21%, signal=29%	55503/3783/5578/278/362/2982/113/4025/952/108/6263/51806/4069/91860/5579/683/1755/727897/483/277/1131/3346/492/276/476/2983
hsa04146	Peroxisome	56	-0.249229	-1.46803	0.0393013	0.105914	0.0694171	2837	tags=45%, list=23%, signal=35%	30/54677/26061/84188/5190/5193/26063/5827/5825/5192/196743/4598/3295/10654/9409/5191/11001/10901/5195/8310/3155/83594/10455/51555/92960
hsa03460	Fanconi anemia pathway	33	-0.303925	-1.55424	0.0451128	0.120553	0.0790122	2201	tags=36%, list=18%, signal=30%	2067/2188/5889/201254/197342/80233/9894/378708/100526739/11201/353497/84126
hsa05100	Bacterial invasion of epithelial cells	49	0.31906	1.49182	0.0469974	0.124543	0.081627	6049	tags=76%, list=49%, signal=39%	4233/5293/399694/60/5295/858/10095/10092/9844/10109/867/8218/7414/3059/3688/5290/391/8936/2335/1499/55964/26052/3678/23157/55752/6464/53358/1398/8503/5879/10163/1731/6714/10093/5291/79658/5747
hsa01521	EGFR tyrosine kinase inhibitor resistance	55	0.309127	1.48855	0.0505837	0.132939	0.0871297	1902	tags=31%, list=15%, signal=26%	4233/1956/3570/5578/5293/5336/9542/399694/2247/5295/5156/10000/3569/3084/6774/5579/7039
hsa01522	Endocrine resistance	68	-0.226037	-1.42287	0.0536585	0.13946	0.0914035	1078	tags=21%, list=9%, signal=19%	2885/112/107/572/3265/638/5595/3480/595/4193/25759/2852/2099/596
hsa00520	Amino sugar and nucleotide sugar metabolism	32	0.361133	1.50507	0.0539419	0.13946	0.0914035	4488	tags=62%, list=36%, signal=40%	7360/5236/9945/51700/2762/6675/3101/80896/80201/5238/80146/55276/1727/140838/2821/27159/55907/5973/1118/51167
hsa05226	Gastric cancer	105	0.252919	1.39376	0.060241	0.154489	0.101254	1391	tags=21%, list=11%, signal=19%	4233/1956/83439/8326/5293/6932/6934/7475/399694/2247/26291/80326/5295/81029/10000/898/7474/1871/8324/7042/5915/7046
hsa04931	Insulin resistance	83	0.271997	1.4254	0.0609453	0.155045	0.101618	1708	tags=25%, list=14%, signal=22%	64764/5465/133522/5293/9945/53632/6197/5500/7132/7124/9586/5588/5562/5295/10000/22877/3569/9021/10891/6774/5579
hsa00280	Valine, leucine and isoleucine degradation	27	-0.30972	-1.47325	0.0616438	0.155577	0.101967	3005	tags=52%, list=24%, signal=39%	35/30/5096/549/1892/4329/593/64087/64902/18/3155/36/3712/587
hsa04072	Phospholipase D signaling pathway	112	0.248629	1.37787	0.0690073	0.17279	0.113249	4241	tags=45%, list=34%, signal=30%	5337/1956/3576/22800/22808/5321/23566/5578/56895/5293/5336/399694/113/3815/1608/5295/5156/10000/8877/108/5737/123745/2207/183/5294/27128/553/2534/23533/6654/5290/160851/57121/8613/2916/23236/5330/8395/6009/109/9162/5332/6850/2185/1950/5594/5338/26052/3845/3579
hsa05010	Alzheimer disease	226	-0.156536	-1.2651	0.07	0.173906	0.11398	2205	tags=27%, list=18%, signal=23%	4707/4712/89953/4729/10476/778/8408/498/83464/506/489/374291/5296/10297/2905/4722/4708/4728/4724/1351/3667/9706/4705/1855/4714/113457/7278/291/776/808/8678/7473/10383/3551/3708/84701/51079/842/513/4702/4698/64837/1350/10975/572/4716/3265/5595/4717/3800/1337/4696/7494/1020/4137/4695/112714/10023/517/1345/4701
hsa00062	Fatty acid elongation	19	-0.357801	-1.50996	0.0710059	0.175038	0.114722	1242	tags=37%, list=10%, signal=33%	641371/122970/10965/51495/9524/54898/9374
hsa00533	Glycosaminoglycan biosynthesis - keratan sulfate	10	0.510459	1.4965	0.0735524	0.179921	0.117922	1051	tags=40%, list=8%, signal=37%	93010/9435/10164/4166
hsa03010	Ribosome	74	-0.21093	-1.34508	0.0788177	0.191329	0.125399	4654	tags=59%, list=37%, signal=37%	6203/6189/6136/6191/6169/6164/6168/6229/25873/64963/64928/6122/6139/6231/6193/6147/219927/6133/51021/51065/11224/51081/6208/6205/6159/6158/6176/100526842/23521/6130/10573/6150/51116/9045/64981/29093/6166/79590/124995/6141/55052/6171/51264/6209
hsa05020	Prion diseases	28	0.357417	1.43885	0.0806223	0.194227	0.127298	4012	tags=54%, list=32%, signal=36%	5621/4851/3553/6352/3569/3552/732/2534/3915/712/714/713/4684/5594/3309
hsa00140	Steroid hormone biosynthesis	40	0.318449	1.40581	0.0891892	0.211828	0.138835	3891	tags=48%, list=31%, signal=33%	3294/6715/1545/7364/9420/6783/1646/54578/1645/51144/54658/3290/54577/54575/1583/1581/54657/8644/6718
hsa04932	Non-alcoholic fatty liver disease (NAFLD)	106	-0.180154	-1.27683	0.0898876	0.211828	0.138835	2205	tags=29%, list=18%, signal=24%	4707/4712/4729/2931/5571/374291/5296/4722/4708/4728/4724/1351/3667/4705/4714/3551/84701/51079/4702/4698/1350/10975/4716/4717/5564/1337/4696/7494/4695/1345/4701
hsa04977	Vitamin digestion and absorption	20	0.398166	1.44629	0.0905045	0.211828	0.138835	2833	tags=50%, list=23%, signal=39%	8884/151056/4363/6948/2346/8029/158835/80704/9227/949
hsa04150	mTOR signaling pathway	109	0.241317	1.33324	0.0906892	0.211828	0.138835	1413	tags=21%, list=11%, signal=19%	58528/8326/54541/5578/5293/245973/7475/8140/6446/23175/6197/6502/7132/7124/80326/5562/5295/81029/10000/7474/8324/2887/64121
hsa05204	Chemical carcinogenesis	53	0.296271	1.41344	0.0912647	0.211828	0.138835	2823	tags=36%, list=23%, signal=28%	1545/7364/220/221357/5743/2950/2939/4257/2938/1139/1646/54578/873/54658/3290/54577/218/221/54575
hsa05215	Prostate cancer	71	0.272685	1.38959	0.0919255	0.211828	0.138835	1236	tags=23%, list=10%, signal=20%	1956/64764/83439/7850/2950/5293/6932/6934/2119/7113/9586/5295/5156/10000/898/1871
hsa05222	Small cell lung cancer	71	0.272059	1.3864	0.0931677	0.213146	0.139699	1499	tags=23%, list=12%, signal=20%	3914/1021/5743/330/3918/5293/1286/6502/5295/10000/898/1871/284217/5915/329/1285
hsa05412	Arrhythmogenic right ventricular cardiomyopathy (ARVC)	54	0.289884	1.39299	0.101804	0.231241	0.151558	4118	tags=50%, list=33%, signal=34%	83439/1756/3696/1824/6932/6934/60/3694/3695/5318/284217/1829/3691/3688/3680/1832/27091/6546/88/3690/6262/3685/3676/1674/1499/782/3678
hsa05224	Breast cancer	101	0.242406	1.3209	0.103785	0.234069	0.153411	2777	tags=31%, list=22%, signal=24%	1956/83439/1021/8326/5293/6932/6934/7475/399694/4851/3815/2247/26291/80326/5295/81029/10000/7474/1871/8324/2252/2250/4853/4040/4791/8600/8323/6654/5290/1647/2254
hsa01040	Biosynthesis of unsaturated fatty acids	21	-0.3178	-1.40322	0.109145	0.244422	0.160197	1623	tags=38%, list=13%, signal=33%	3295/641371/122970/10965/8310/51495/9524/54898
hsa04012	ErbB signaling pathway	63	0.277736	1.36788	0.111675	0.246947	0.161852	2740	tags=33%, list=22%, signal=26%	1956/8440/4690/5578/5293/5336/9542/399694/2069/817/5295/5063/10000/3084/5579/7039/867/815/6654/5290/1839
hsa04512	ECM-receptor interaction	57	0.283123	1.37359	0.111825	0.246947	0.161852	1499	tags=23%, list=12%, signal=20%	3914/3696/3371/3918/1286/1299/6696/3694/6382/3695/284217/961/1285
hsa04918	Thyroid hormone synthesis	53	0.28321	1.35113	0.114733	0.251621	0.164915	4745	tags=57%, list=38%, signal=35%	64764/5578/113/9586/2882/50506/108/5579/493869/483/9601/476/7184/405753/5172/433/23236/5330/486/109/2878/5332/7253/3309/468/6528/481/1385/8458/432
hsa04727	GABAergic synapse	59	0.276976	1.34402	0.116129	0.252939	0.165779	1861	tags=27%, list=15%, signal=23%	2564/2568/5578/9568/113/59345/2744/10991/55879/6538/23710/108/92745/773/5579/2770
hsa04622	RIG-I-like receptor signaling pathway	45	0.295746	1.35476	0.121693	0.263255	0.17254	5259	tags=58%, list=42%, signal=33%	3576/3592/10010/3627/7124/64135/9641/1540/338376/9474/843/80143/7187/3593/841/3456/3446/340061/1432/3445/6885/4792/4790/23586/1654/3441
hsa05410	Hypertrophic cardiomyopathy (HCM)	65	0.26761	1.3327	0.124216	0.266896	0.174927	4118	tags=48%, list=33%, signal=32%	1906/1756/3696/60/53632/7124/5562/3694/3695/7042/284217/3569/183/7139/3691/3688/3680/27091/6546/5565/3690/6262/3685/3676/7169/1674/4625/7168/782/7171/3678
hsa00770	Pantothenate and CoA biosynthesis	16	0.401747	1.36986	0.125749	0.268376	0.175897	1267	tags=31%, list=10%, signal=28%	55350/8875/8876/1806/586
hsa05032	Morphine addiction	58	0.273461	1.32605	0.127249	0.269769	0.17681	1861	tags=26%, list=15%, signal=22%	5142/2564/2568/5578/5150/9568/113/59345/5144/55879/108/5137/773/5579/2770
hsa04140	Autophagy - animal	94	0.240856	1.29308	0.12963	0.272995	0.178924	2003	tags=23%, list=16%, signal=20%	8837/22800/58528/22808/29982/54541/3091/1612/338382/5293/10010/5588/5562/5295/441925/10000/23710/64121/1514/3920/1508/9474
hsa04024	cAMP signaling pathway	153	0.212248	1.23743	0.132184	0.276543	0.181249	1484	tags=18%, list=12%, signal=16%	5337/5142/1906/64764/22800/1258/5465/2740/1259/6662/5293/10257/9568/1907/84152/113/5727/5500/9586/817/5144/1128/5295/10000/108/2904/51806/9475
hsa04550	Signaling pathways regulating pluripotency of stem cells	105	0.230809	1.27192	0.13494	0.280463	0.183819	2054	tags=24%, list=17%, signal=20%	1852/8326/3976/3198/5293/6932/3718/7475/3400/5460/2247/5080/80326/5295/81029/10000/7474/8324/1749/6774/64211/5013/4093/80712/4211
hsa00360	Phenylalanine metabolism	12	0.440466	1.35902	0.137008	0.282912	0.185424	3475	tags=58%, list=28%, signal=42%	220/259307/218/221/3242/1644/4129
hsa04962	Vasopressin-regulated water reabsorption	33	-0.262095	-1.34033	0.139098	0.28465	0.186563	3849	tags=55%, list=31%, signal=38%	5567/8766/10488/396/115/554/1781/51143/5878/140735/79659/5869/112/51164/148327/1639/51626/6844
hsa00532	Glycosaminoglycan biosynthesis - chondroitin sulfate / dermatan sulfate	15	0.405927	1.34981	0.13964	0.28465	0.186563	1031	tags=27%, list=8%, signal=24%	9469/50515/29940/55790
hsa00061	Fatty acid biosynthesis	12	0.438202	1.35203	0.143307	0.290265	0.190243	1495	tags=33%, list=12%, signal=29%	51703/2182/55301/2180
hsa04924	Renin secretion	46	0.280977	1.29304	0.148541	0.298962	0.195944	1956	tags=28%, list=16%, signal=24%	1906/1907/2982/3759/22802/9635/5734/5137/51806/91860/2770/1508/183
hsa00480	Glutathione metabolism	37	0.300152	1.31172	0.152722	0.305445	0.200192	4306	tags=54%, list=35%, signal=35%	221357/2950/2939/4257/4953/2882/2938/493869/3418/494143/124975/79094/9588/2730/2878/2941/51056/2539/51060/3417
hsa04068	FoxO signaling pathway	90	0.237988	1.27086	0.154601	0.30601	0.200563	3216	tags=36%, list=26%, signal=27%	6648/114907/1956/5293/6446/53632/6502/3575/5562/5295/10000/23710/7042/3569/7046/604/6774/356/9454/8743/9456/8698/6654/5290/5896/1647/472/2290/3586/2308/5565/894
hsa00514	Other types of O-glycan biosynthesis	29	0.324372	1.31462	0.15493	0.30601	0.200563	967	tags=24%, list=8%, signal=22%	6480/56913/285203/79695/2591/79709/2590
hsa05214	Glioma	58	0.265195	1.28597	0.159383	0.312863	0.205054	2866	tags=36%, list=23%, signal=28%	1956/1021/5578/5293/5336/399694/817/5295/5156/10000/1871/51806/91860/5579/7039/815/57118/6654/5290/1647/1029
hsa00980	Metabolism of xenobiotics by cytochrome P450	49	0.275234	1.2869	0.160574	0.313268	0.20532	2823	tags=37%, list=23%, signal=29%	1545/7364/220/221357/2950/2939/4257/2938/874/54578/1645/873/54658/3290/54577/218/221/54575
hsa04929	GnRH secretion	53	-0.208621	-1.20931	0.161702	0.313544	0.205501	1631	tags=26%, list=13%, signal=23%	84634/3781/610/776/348980/3708/1081/408/8912/3265/5595/3760/2852/3767
hsa01230	Biosynthesis of amino acids	49	0.273815	1.28026	0.164491	0.317019	0.207778	3257	tags=37%, list=26%, signal=27%	445/29968/5214/2023/26227/7086/586/2597/5230/3418/5631/5315/7167/6472/875/22934/8277/384
hsa04270	Vascular smooth muscle contraction	95	0.22876	1.23401	0.168305	0.322415	0.211315	2729	tags=28%, list=22%, signal=22%	133/136/1906/5321/5578/1907/2982/113/5500/5588/108/4638/800/51806/9475/3779/123745/91860/5579/91807/183/553/340156/72/26279/2983/797
hsa01524	Platinum drug resistance	58	0.257693	1.24959	0.177378	0.337761	0.221373	1485	tags=24%, list=12%, signal=21%	355/221357/330/2950/5293/2939/4217/4257/637/5295/2938/10000/1317/329
hsa00512	Mucin type O-glycan biosynthesis	21	0.350658	1.28488	0.179487	0.339744	0.222672	3000	tags=43%, list=24%, signal=33%	56913/9334/79695/2591/2590/374378/9245/79623/114805
hsa05211	Renal cell carcinoma	53	0.260936	1.24486	0.183833	0.345911	0.226714	1268	tags=21%, list=10%, signal=19%	4233/3091/5293/112399/54583/5295/5063/2034/2113/10000/7042
hsa04934	Cushing syndrome	111	0.218619	1.20697	0.185592	0.347167	0.227537	4051	tags=40%, list=33%, signal=27%	1956/64764/83439/1021/8326/6932/6934/7475/113/9586/817/80326/81029/898/7474/108/1871/8324/196/1394/3776/2770/183/23746/8323/815/949/1029/1583/8321/2271/5906/23236/5330/7476/109/7472/5443/5332/2932/1499/5594/8911/468
hsa04144	Endocytosis	174	-0.149384	-1.17135	0.186992	0.347739	0.227913	1570	tags=20%, list=13%, signal=17%	51510/11059/22905/23550/51160/160/55048/3305/729092/5869/5662/100287171/7251/128866/50855/408/84313/3265/3480/2868/9135/55040/3800/118813/84612/9727/4193/9266/27243/58513/23327/155382/56904/2261
hsa00640	Propanoate metabolism	16	-0.32036	-1.25193	0.197605	0.365339	0.239448	3005	tags=50%, list=24%, signal=38%	35/5096/1892/4329/593/18/8310/84532
hsa04530	Tight junction	115	0.213114	1.18739	0.202654	0.372508	0.244146	3308	tags=33%, list=27%, signal=24%	9076/4478/10686/8531/5962/60/10096/7277/4217/53632/23562/154796/87/5562/9071/50848/5521/9475/51762/51421/154810/10627/9075/84790/909/11149/3059/7454/3688/10097/4771/9073/9181/5565/1080/4627/51807/5906
hsa04110	Cell cycle	91	0.223325	1.19457	0.209102	0.382152	0.250467	5910	tags=64%, list=48%, signal=34%	1021/8900/27127/6502/898/1871/7042/8555/4174/5933/994/7029/1111/545/1874/1647/472/1029/4998/7533/64682/7272/3066/991/4175/4173/894/7027/699/11200/8317/5591/2932/5347/890/10926/9133/23594/990/1030/1031/9134/1870/4176/993/10274/8318/4172/4171/4609/1017/1875/7534/1019/23595/896/2810/8243
hsa00010	Glycolysis / Gluconeogenesis	48	0.263748	1.22604	0.212121	0.385455	0.252632	2785	tags=35%, list=22%, signal=28%	5214/2023/220/5236/3939/3101/2597/5230/92483/80201/219/5315/55276/7167/218/5160/221
hsa04972	Pancreatic secretion	71	0.239981	1.22293	0.213665	0.386053	0.253024	3728	tags=42%, list=30%, signal=30%	5578/278/113/5646/952/108/22802/9635/5579/683/483/277/1358/1131/492/276/476/26279/1080/5906/23236/5330/486/885/493/1506/6262/5320/109/5332
hsa04966	Collecting duct acid secretion	20	-0.281775	-1.20504	0.222561	0.398499	0.261181	1208	tags=25%, list=10%, signal=23%	534/535/155066/527/9550
hsa04926	Relaxin signaling pathway	92	0.21948	1.17281	0.223325	0.398499	0.261181	4843	tags=50%, list=39%, signal=31%	1956/1906/64764/5578/5293/1286/399694/113/3640/59345/9586/5295/10000/108/4312/7046/1285/2770/59350/6654/5290/2769/117579/4318/23236/5330/2793/4322/109/54331/5332/55970/7048/5594/468/3845/4313/1432/4842/1385/59/5604/6464/4792/4790/53358
hsa00030	Pentose phosphate pathway	23	0.322594	1.22707	0.224313	0.398499	0.261181	4372	tags=61%, list=35%, signal=40%	5214/5236/7086/5631/51071/55276/9104/22934/8277/9563/6120/2821/2539/5634
hsa00565	Ether lipid metabolism	32	0.292176	1.21768	0.228216	0.403181	0.26425	4050	tags=50%, list=33%, signal=34%	5337/5321/7368/54947/7941/151056/123745/133121/79888/26279/5048/8613/5168/5320/9514/5338
hsa00982	Drug metabolism - cytochrome P450	49	0.257442	1.20371	0.23107	0.405969	0.266077	2854	tags=33%, list=23%, signal=25%	7364/220/221357/2950/2939/4257/2327/2938/54578/2328/54658/54577/218/221/54575/316
hsa05231	Choline metabolism in cancer	71	0.234843	1.19675	0.234783	0.407843	0.267305	4180	tags=44%, list=34%, signal=29%	5337/1956/5321/3091/5578/5293/1608/5295/5156/10000/123745/5579/6581/10810/5880/7454/6654/5290/56261/160851/9468/8613/5130/8395/6009/9162/8936/1950/5594/5338/3845
hsa00760	Nicotinate and nicotinamide metabolism	25	0.309262	1.20634	0.234957	0.407843	0.267305	1736	tags=28%, list=14%, signal=24%	10135/22978/4907/952/4837/4860/683
hsa05218	Melanoma	53	0.247331	1.17996	0.235984	0.407843	0.267305	2866	tags=32%, list=23%, signal=25%	4233/1956/1021/5293/2247/26291/5295/5156/10000/1871/2252/2250/4286/5290/1647/2254/1029
hsa04142	Lysosome	86	0.220383	1.16796	0.238971	0.409794	0.268584	2408	tags=29%, list=19%, signal=24%	27074/1075/10577/1520/9516/5641/1515/50617/7805/6556/1514/968/3920/411/1508/1522/3482/768239/79158/1509/2760/130340/8218/1521/1176
hsa04115	p53 signaling pathway	54	0.246766	1.18579	0.239691	0.409794	0.268584	3912	tags=43%, list=31%, signal=29%	3732/55240/355/1021/64065/5268/637/3486/898/8795/1111/92344/545/1647/472/1029/64393/894/56475/54205/841/11200/9538
hsa00511	Other glycan degradation	14	-0.326623	-1.18845	0.243402	0.413913	0.271284	2804	tags=79%, list=23%, signal=61%	2629/4126/3074/129807/175/4758/4123/2517/57704/23324/284004
hsa00670	One carbon pool by folate	10	0.406802	1.19262	0.251956	0.42511	0.278622	2910	tags=40%, list=23%, signal=31%	25902/160428/6472/2618
hsa00561	Glycerolipid metabolism	42	0.260511	1.16903	0.25266	0.42511	0.278622	4111	tags=45%, list=33%, signal=30%	80339/9388/56895/23175/1608/80168/84649/219/57016/119548/160851/8613/231/9162/84803/2710/116255/3990/253558
hsa05017	Spinocerebellar ataxia	65	0.234545	1.16804	0.260979	0.436796	0.286281	1708	tags=22%, list=14%, signal=19%	29982/5578/5293/7436/4217/9519/6511/5295/441925/10000/2904/6261/773/5579
hsa00983	Drug metabolism - other enzymes	58	0.236024	1.14451	0.273779	0.4547	0.298016	2823	tags=31%, list=23%, signal=24%	7364/1806/221357/2950/2939/8833/7378/4257/2938/7371/51727/54578/7498/1807/54658/54577/4353/54575
hsa04370	VEGF signaling pathway	46	0.254018	1.16898	0.274536	0.4547	0.298016	1708	tags=24%, list=14%, signal=21%	5321/5578/5743/5293/5336/9047/5295/10000/8877/123745/5579
hsa00053	Ascorbate and aldarate metabolism	19	0.328489	1.17198	0.281627	0.464027	0.304129	5774	tags=74%, list=46%, signal=40%	7364/54578/219/54658/54577/54575/9104/54657/54576/54600/54579/54659/501/217
hsa04371	Apelin signaling pathway	101	0.2061	1.12307	0.283272	0.464124	0.304192	4593	tags=47%, list=37%, signal=30%	22800/22808/113/53632/59345/6696/5562/441925/10000/8877/23710/108/6263/4638/7046/51806/10891/91860/6261/91807/2770/5294/340156/23533/1490/5140/6546/5565/23236/5330/2793/6262/109/54331/5332/4208/9759/55970/5594/805/3845/4205/7019/4633/4842/59/5604
hsa04744	Phototransduction	20	0.323419	1.17478	0.284866	0.464124	0.304192	1594	tags=25%, list=13%, signal=22%	1258/1259/2978/51806/91860
hsa04725	Cholinergic synapse	88	0.212169	1.13043	0.286064	0.464124	0.304192	4206	tags=44%, list=34%, signal=30%	64764/5578/5293/9132/113/59345/9586/3759/817/1128/5295/10000/1139/108/773/5579/2770/5294/1131/2534/815/23533/1136/5290/56479/23236/5330/3761/2793/109/54331/5332/55970/5594/468/3784/3845/43/6572
hsa04921	Oxytocin signaling pathway	121	0.1998	1.12417	0.290131	0.468333	0.306951	1861	tags=21%, list=15%, signal=18%	1827/1956/5321/5997/5578/5743/60/2982/113/53632/5500/3759/952/817/5562/108/6263/4638/51806/9475/123745/91860/6261/5579/91807/2770
hsa04213	Longevity regulating pathway - multiple species	48	0.247432	1.15019	0.293808	0.471873	0.309271	1204	tags=19%, list=10%, signal=17%	6648/1410/5293/113/53632/5562/5295/10000/108
hsa00051	Fructose and mannose metabolism	23	0.30096	1.14477	0.309696	0.494891	0.324358	2726	tags=39%, list=22%, signal=31%	5214/5208/5209/2762/3101/57103/80201/7167/57016
hsa00860	Porphyrin and chlorophyll metabolism	31	0.267493	1.10848	0.317614	0.504558	0.330694	3615	tags=35%, list=29%, signal=25%	1356/7364/3052/54578/9843/54658/54577/54575/3162/54657/1371
hsa05014	Amyotrophic lateral sclerosis (ALS)	40	0.252953	1.11667	0.318919	0.504558	0.330694	3879	tags=45%, list=31%, signal=31%	834/4217/7132/7124/2882/637/2904/7133/5606/493869/5608/84134/79139/2903/5534/54205/2878/847
hsa00040	Pentose and glucuronate interconversions	24	0.29126	1.12799	0.320917	0.505206	0.331118	5359	tags=67%, list=43%, signal=38%	7364/7360/54578/54658/54577/57016/54575/231/54657/6120/9942/27294/54576/54600/54579/54659
hsa01200	Carbon metabolism	75	0.211908	1.08699	0.328358	0.514374	0.337127	4073	tags=41%, list=33%, signal=28%	29968/5214/2023/26227/54363/4199/3101/7086/2597/6392/5230/3418/1962/5631/80201/5315/7167/6472/5160/9104/22934/1737/8277/2271/9563/4200/6120/84706/847/2821/2539
hsa00120	Primary bile acid biosynthesis	13	0.349829	1.10651	0.334906	0.51922	0.340303	4256	tags=54%, list=34%, signal=35%	51302/9420/1581/9023/6718/1582/1593
hsa04919	Thyroid hormone signaling pathway	89	0.205202	1.09228	0.335381	0.51922	0.340303	4604	tags=47%, list=37%, signal=30%	1827/5214/117247/3091/5578/5293/5336/60/4851/5208/5295/10000/5579/483/6772/90390/4853/1734/51196/476/5290/9440/2308/3066/3690/23236/5330/486/6009/5332/3685/4625/9882/2932/1499/5594/3845/481/488/6513/5604/9282
hsa00410	beta-Alanine metabolism	21	0.304374	1.11528	0.33635	0.51922	0.340303	2785	tags=38%, list=22%, signal=30%	220/1806/54498/1962/1807/219/218/221
hsa05414	Dilated cardiomyopathy (DCM)	67	0.218149	1.09079	0.339196	0.519649	0.340584	4118	tags=43%, list=33%, signal=29%	1756/3696/60/113/7124/3694/3695/108/7042/284217/183/7139/3691/3688/3680/27091/6546/3690/6262/109/3685/3676/7169/1674/4625/7168/782/7171/3678
hsa04152	AMPK signaling pathway	79	0.209587	1.08624	0.340426	0.519649	0.340584	1552	tags=19%, list=12%, signal=17%	5214/64764/5523/8900/5293/23216/53632/5208/5209/9586/5562/5295/10000/5521/10891
hsa04964	Proximal tubule bicarbonate reclamation	13	-0.300714	-1.08214	0.34153	0.519649	0.340584	1722	tags=38%, list=14%, signal=33%	2746/477/5106/480/27165
hsa04022	cGMP-PKG signaling pathway	117	0.192414	1.0783	0.343266	0.519802	0.340685	4593	tags=44%, list=37%, signal=28%	64764/1258/5997/1259/2982/113/5500/9586/10000/108/4638/51806/9475/3779/91860/91807/2770/483/5294/340156/23533/492/476/6722/2983/292/151/4775/5140/6546/5534/23236/5330/486/493/109/5332/4208/4625/5594/468/7408/805/4205/481/154/10398/491/4772/1385/488/5604
hsa04742	Taste transduction	37	0.24959	1.09075	0.351926	0.528212	0.346196	3487	tags=38%, list=28%, signal=27%	8645/9568/3359/5137/6326/773/1131/80835/22953/5028/2558/2556/5330/259286
hsa04350	TGF-beta signaling pathway	73	0.208886	1.06885	0.352795	0.528212	0.346196	4304	tags=41%, list=35%, signal=27%	56963/4052/650/3400/8200/7124/7042/7046/4093/3458/5933/655/1874/5308/26585/656/57154/654/64750/7027/392255/90/4091/7044/7048/5594/64388/92/57817/3399
hsa00515	Mannose type O-glycan biosynthesis	15	-0.286028	-1.07794	0.354167	0.528212	0.346196	818	tags=27%, list=7%, signal=25%	9486/10585/11041/55624
hsa00310	Lysine degradation	32	0.259098	1.07982	0.355463	0.528212	0.346196	2926	tags=31%, list=24%, signal=24%	8424/5352/5351/79709/150572/79723/1962/219/56950/51166
hsa05203	Viral carcinogenesis	138	0.185705	1.07039	0.360371	0.533014	0.349344	6008	tags=59%, list=48%, signal=31%	4067/64764/1021/8900/5293/3718/3134/9519/6502/87/3133/9586/3106/5295/718/898/1234/3105/6774/5922/7185/5933/4791/1233/1111/5315/3107/6722/5290/1237/1029/7533/3066/7187/991/5610/894/3135/9734/1739/6672/841/9759/6850/3716/5594/468/3845/2961/4055/890/6776/1385/55697/1232/2934/4792/1030/4790/9134/578/1654/5902/11317/1959/8850/3725/1017/8503/245972/5879/27044/7534/84699/4893/1019/896/8362/6714/5291/81
hsa04614	Renin-angiotensin system	15	0.322252	1.07157	0.364865	0.53543	0.350927	2551	tags=33%, list=21%, signal=27%	59272/4311/3816/183/5550
hsa04979	Cholesterol metabolism	36	0.249448	1.08278	0.365591	0.53543	0.350927	5935	tags=64%, list=48%, signal=33%	9388/10577/51129/6646/5360/255738/19/949/4864/1581/3931/3990/1593/336/57552/4023/706/64241/6770/4018/4035/338/8647
hsa05212	Pancreatic cancer	55	0.223424	1.07586	0.367056	0.53543	0.350927	4180	tags=42%, list=34%, signal=28%	5337/1956/1021/5293/5295/10000/1871/7042/7046/6774/7039/6772/5880/5290/1647/1029/3716/7048/1950/5594/5338/675/3845
hsa03020	RNA polymerase	21	-0.239091	-1.05568	0.374631	0.542877	0.355808	2888	tags=38%, list=23%, signal=29%	5439/30834/55718/51082/5434/5438/5441/51728
hsa00534	Glycosaminoglycan biosynthesis - heparan sulfate / heparin	16	0.3145	1.07237	0.375749	0.542877	0.355808	2981	tags=44%, list=24%, signal=33%	9957/2131/2132/90161/9953/9653/2137
hsa04925	Aldosterone synthesis and secretion	71	0.205659	1.04803	0.378882	0.542877	0.355808	4627	tags=46%, list=37%, signal=29%	64764/23683/5578/113/9586/817/108/51806/91860/5579/183/483/815/492/57118/476/949/1583/5587/23236/5330/493/109/5443/5332/3762/8911/468/805/481/491/1385/51305
hsa00830	Retinol metabolism	42	0.239267	1.0737	0.378989	0.542877	0.355808	3628	tags=38%, list=29%, signal=27%	157506/339761/7364/56603/54578/158835/54658/53630/9249/54577/9227/54575/316/54657/8854/1562
hsa04136	Autophagy - other	19	-0.24562	-1.03655	0.390533	0.552711	0.362253	3319	tags=47%, list=27%, signal=35%	55054/23130/11345/11337/9706/8678/64223/3476/84971
hsa04915	Estrogen signaling pathway	108	0.190869	1.05054	0.390987	0.552711	0.362253	1902	tags=21%, list=15%, signal=18%	25984/1956/3868/64764/5293/3872/399694/3866/9568/125115/113/3857/9586/5295/10000/108/51806/91860/2289/3861/390792/2770/7039
hsa04913	Ovarian steroidogenesis	35	0.243973	1.05205	0.391069	0.552711	0.362253	1803	tags=23%, list=15%, signal=20%	3294/1545/5321/5743/113/108/123745/240
hsa00230	Purine metabolism	97	0.192642	1.04229	0.395122	0.555968	0.364388	3010	tags=29%, list=24%, signal=22%	5142/9060/22978/5236/5150/8833/2982/113/4907/100/5144/5152/4860/108/5137/205/7498/11164/5631/5315/158/956/55276/2983/9061/2618/5140/51816
hsa05216	Thyroid cancer	25	-0.22302	-1.03897	0.401316	0.562196	0.36847	733	tags=20%, list=6%, signal=19%	3265/5595/5979/10912/595
hsa04935	Growth hormone synthesis, secretion and action	87	0.194995	1.03706	0.406593	0.567091	0.371678	4873	tags=47%, list=39%, signal=29%	64764/5578/5293/5336/399694/8651/113/9586/5295/3486/10000/108/9021/5606/6774/5579/2770/2692/6772/5608/6654/5290/1443/6753/2688/23236/5330/109/5332/2932/5594/468/3845/6776/1432/1385/5604/6464/53358/3717/51738
hsa00630	Glyoxylate and dicarboxylate metabolism	14	-0.280706	-1.02138	0.416422	0.578263	0.379001	3176	tags=50%, list=26%, signal=37%	132158/5096/9380/81888/283871/112817/84532
hsa04928	Parathyroid hormone synthesis, secretion and action	80	0.196816	1.02191	0.421053	0.582151	0.381549	4051	tags=38%, list=33%, signal=25%	10568/5337/5142/1956/64764/5578/113/9586/5144/108/50964/5579/2770/4040/8600/4323/860/1839/9935/23236/5330/4322/109/5332/4208/1591/5594/4041/5338/468
hsa00220	Arginine biosynthesis	12	-0.289231	-1.01084	0.427793	0.58891	0.385979	2335	tags=50%, list=19%, signal=41%	435/95/2806/2746/162417/27165
hsa04730	Long-term depression	43	0.225815	1.01834	0.431635	0.591638	0.387767	1861	tags=23%, list=15%, signal=20%	4067/5321/5578/2982/1394/123745/6261/773/5579/2770
hsa04930	Type II diabetes mellitus	32	0.241911	1.0082	0.445367	0.607839	0.398385	2685	tags=34%, list=22%, signal=27%	5293/8651/7124/5295/3101/9021/773/80201/3651/5315/5290
hsa03018	RNA degradation	56	0.208132	1.00767	0.4489	0.607906	0.398429	2798	tags=25%, list=23%, signal=19%	10950/5214/2023/219988/132430/694/11044/10200/11157/26986/28960/8761/54464/5042
hsa04211	Longevity regulating pathway	63	0.206054	1.01484	0.449239	0.607906	0.398429	1204	tags=16%, list=10%, signal=14%	6648/64764/5293/113/53632/9586/5562/5295/10000/108
hsa03050	Proteasome	25	0.2572	1.00326	0.451289	0.608093	0.398552	6300	tags=64%, list=51%, signal=32%	23198/5698/5690/3458/5696/5713/5692/5708/143471/5683/5717/5701/7979/5699/10213/5700
hsa05033	Nicotine addiction	28	0.24988	1.00594	0.459689	0.616798	0.404257	5766	tags=64%, list=46%, signal=35%	2564/2568/55879/1139/2904/773/2558/2903/2556/2570/116443/2567/140679/2893/57084/200959/774/116444
hsa04917	Prolactin signaling pathway	53	0.209125	0.997688	0.468057	0.624882	0.409555	4858	tags=55%, list=39%, signal=33%	2001/5293/399694/8651/8792/5295/3659/10000/9021/6774/6772/8600/1447/6654/5290/894/9655/2100/2932/5594/3845/6776/1432/5604/2309/6464/4790/53358/3717
hsa04540	Gap junction	65	0.199918	0.995594	0.470514	0.624882	0.409555	5152	tags=52%, list=41%, signal=31%	1956/5578/2982/7277/113/5156/108/84617/5579/3356/2770/84790/2983/6654/51807/23236/5330/81027/57369/109/5332/1950/5594/3845/10381/56034/10382/5604/347733/153/1902/3358/5598/10746
hsa00604	Glycosphingolipid biosynthesis - ganglio series	11	0.330178	0.993021	0.471609	0.624882	0.409555	2053	tags=27%, list=17%, signal=23%	6489/9197/81849
hsa05110	Vibrio cholerae infection	37	0.224864	0.982699	0.482072	0.636095	0.416904	1175	tags=19%, list=9%, signal=17%	5578/5336/245973/30001/60/50617/29927
hsa05213	Endometrial cancer	42	0.216947	0.973537	0.494681	0.647263	0.424224	1127	tags=17%, list=9%, signal=15%	1956/83439/5293/6932/6934/5295/10000
hsa00590	Arachidonic acid metabolism	42	0.215757	0.968196	0.496011	0.647263	0.424224	3773	tags=38%, list=30%, signal=27%	5321/5743/2882/151056/874/123745/493869/240/873/5730/5740/26279/5742/5320/2878/8644
hsa04910	Insulin signaling pathway	101	-0.141359	-0.986241	0.497268	0.647263	0.424224	2052	tags=24%, list=17%, signal=20%	5507/5571/2872/8835/5296/7249/3099/5261/89801/3667/5509/808/3551/5106/2885/572/3265/5595/5564/10211/27124/25759/92579/2203
hsa00600	Sphingolipid metabolism	32	0.234268	0.976342	0.499308	0.647263	0.424224	1405	tags=22%, list=11%, signal=19%	7368/166929/130367/8560/8877/259230/55304
hsa00250	Alanine, aspartate and glutamate metabolism	26	0.247201	0.976305	0.500713	0.647263	0.424224	1605	tags=23%, list=13%, signal=20%	445/9945/259307/2744/2346/80150
hsa04922	Glucagon signaling pathway	79	0.187422	0.971367	0.508135	0.654198	0.42877	3362	tags=32%, list=27%, signal=23%	5214/64764/5465/53632/9586/817/5562/10000/3939/108/51806/10891/91860/92483/815/5315/5836/5160/2308/5140/5260/5565/5534/23236/5330
hsa04137	Mitophagy - animal	44	0.210894	0.957704	0.512583	0.657263	0.430778	2431	tags=25%, list=20%, signal=20%	22800/22808/3091/338382/10133/441925/23710/9474/55669/1459/4286
hsa00340	Histidine metabolism	16	0.27582	0.940476	0.519461	0.663408	0.434806	5774	tags=62%, list=46%, signal=33%	220/219/218/221/131669/4129/26/84735/501/217
hsa05168	Herpes simplex virus 1 infection	309	0.154257	0.986604	0.522655	0.664818	0.43573	1570	tags=15%, list=13%, signal=14%	7097/3459/3455/355/3112/330/8740/3592/115004/6347/5293/3108/3134/5371/6891/6890/3553/5500/7132/3133/7124/5452/637/3460/64135/3106/972/6352/5295/718/10000/567/64170/9641/3122/285676/6732/3654/346171/3109/3569/5818/9021/329/10308/4049/3105
hsa01212	Fatty acid metabolism	39	0.216804	0.953615	0.526316	0.666806	0.437033	2298	tags=28%, list=18%, signal=23%	51703/2182/201562/2180/9415/33/1962/3992/51144/9200/6785
hsa03060	Protein export	10	0.320258	0.938896	0.539906	0.678944	0.444988	2095	tags=40%, list=17%, signal=33%	29927/11231/6734/58477
hsa00270	Cysteine and methionine metabolism	30	0.225718	0.93085	0.540166	0.678944	0.444988	1967	tags=23%, list=16%, signal=20%	29968/26227/259307/3939/586/55256/92483
hsa04215	Apoptosis - multiple species	22	0.24868	0.932406	0.548529	0.686742	0.450099	1485	tags=23%, list=12%, signal=20%	330/7132/637/441925/329
hsa00910	Nitrogen metabolism	11	0.310661	0.934323	0.55205	0.688439	0.451212	1751	tags=27%, list=14%, signal=23%	768/765/377677
hsa04722	Neurotrophin signaling pathway	86	0.177374	0.94003	0.555147	0.689597	0.45197	1949	tags=20%, list=16%, signal=17%	8767/5293/5336/399694/3656/4217/6197/817/5295/11213/10000/3654/51806/4794/91860/4909/356
hsa05031	Amphetamine addiction	55	0.18988	0.914333	0.575875	0.709533	0.465037	3475	tags=31%, list=28%, signal=22%	64764/5578/84152/5500/9586/817/2904/51806/91860/5579/815/6531/3066/1644/2903/5534/4129
hsa00970	Aminoacyl-tRNA biosynthesis	28	-0.18747	-0.920351	0.576271	0.709533	0.465037	3890	tags=50%, list=31%, signal=34%	5859/23438/80222/2193/283459/118672/6301/10667/124454/3035/54938/51091/5188/57176
hsa03008	Ribosome biogenesis in eukaryotes	57	0.187115	0.907803	0.579692	0.709533	0.465037	6458	tags=63%, list=52%, signal=30%	25996/10940/84916/55131/23160/1459/55127/83732/55916/54464/10885/1736/23560/51077/51068/10799/55813/6949/9790/28987/4809/10199/10813/84128/27341/54913/51602/10556/10557/2091/5901/1457/10171/54552/728343/29889
hsa03013	RNA transport	96	-0.137463	-0.951293	0.580311	0.709533	0.465037	10447	tags=99%, list=84%, signal=16%	3646/10940/4116/94026/55520/26986/9688/55916/8761/5042/9939/26019/9631/6612/8894/23279/11260/8563/53371/10762/55706/51068/10799/96764/5903/81929/387082/1965/9470/1981/57510/9669/8891/54913/55110/1979/1964/9972/11097/1968/10556/22916/80145/8664/8667/6396/2332/10189/10557/253314/65109/8662/5901/728343/1982/56001/57122/7514/79023/7175/10775/1983/50628/5976/79897/79833/10248/10284/10482/10419/8672/86…
hsa03030	DNA replication	22	0.239662	0.898593	0.582353	0.709533	0.465037	5885	tags=68%, list=47%, signal=36%	246243/5984/4174/5558/29935/4175/4173/10714/6117/4176/4172/4171/1763/5983/2237
hsa04927	Cortisol synthesis and secretion	44	-0.165843	-0.923062	0.587045	0.711638	0.466416	1363	tags=20%, list=11%, signal=18%	1586/776/5087/3708/112/107/185/8912/148327
hsa00730	Thiamine metabolism	12	-0.261099	-0.912518	0.588556	0.711638	0.466416	1077	tags=25%, list=9%, signal=23%	79178/203/158067
hsa00240	Pyrimidine metabolism	42	0.198392	0.890272	0.599734	0.719893	0.471827	2090	tags=24%, list=17%, signal=20%	22978/1806/7378/4907/4860/7371/51727/1503/129607/1807
hsa00350	Tyrosine metabolism	27	0.224095	0.899005	0.602817	0.719893	0.471827	4210	tags=44%, list=34%, signal=29%	220/259307/218/221/316/3242/1644/1638/7306/4129/127/130
hsa02010	ABC transporters	31	0.214988	0.890903	0.603329	0.719893	0.471827	2561	tags=29%, list=21%, signal=23%	1672/10257/154664/6891/6890/4363/225/1244/19
hsa00562	Inositol phosphate metabolism	49	0.192383	0.899517	0.604439	0.719893	0.471827	3728	tags=37%, list=30%, signal=26%	23007/5293/5336/8898/3613/5288/3635/253430/5294/55300/51196/7167/5290/23236/5330/8395/55613/5332
hsa04960	Aldosterone-regulated sodium reabsorption	26	0.224101	0.885071	0.607703	0.721081	0.472605	4309	tags=50%, list=35%, signal=33%	5578/5293/6446/5295/5579/483/476/5290/486/5594/3845/481/3758
hsa01210	2-Oxocarboxylic acid metabolism	12	-0.255723	-0.893732	0.618529	0.731197	0.479236	2156	tags=33%, list=17%, signal=28%	95/2806/162417/587
hsa04141	Protein processing in endoplasmic reticulum	102	0.163882	0.896445	0.631068	0.742186	0.486438	4606	tags=42%, list=37%, signal=27%	1410/824/10130/30001/4217/55432/7321/29927/9532/81567/10970/6747/51465/11231/6745/10525/9601/56886/23471/811/3703/7184/1650/6184/5610/79139/4780/85479/5034/6238/5611/91319/6746/4287/79748/3309/468/10905/1965/10802/7991/10484/102724652
hsa04950	Maturity onset diabetes of the young	11	0.29229	0.879071	0.632492	0.742186	0.486438	7803	tags=91%, list=63%, signal=34%	5080/3651/3174/3170/4821/168620/6928/3171/389692/5313
hsa00020	Citrate cycle (TCA cycle)	13	0.267838	0.847175	0.650943	0.761029	0.498788	4691	tags=54%, list=38%, signal=34%	6392/3418/5160/1737/2271/3417/48
hsa04961	Endocrine and other factor-regulated calcium reabsorption	33	0.19911	0.841923	0.654891	0.761039	0.498794	4487	tags=48%, list=36%, signal=31%	5578/3816/5579/483/8218/492/476/6546/23236/5330/486/493/5332/26052/481/491
hsa05034	Alcoholism	110	-0.128002	-0.923578	0.655738	0.761039	0.498794	3868	tags=41%, list=31%, signal=28%	5499/10014/5567/8365/8360/8341/10488/8336/8337/8338/554313/3013/8351/8344/3018/9555/6571/2782/83933/2902/10013/163688/10645/8357/2775/8347/2905/8363/121504/51564/808/55315/2783/2885/8349/8334/3265/5595/148327/3017/55766/51764/79885/2785/25759
hsa04912	GnRH signaling pathway	71	0.170305	0.867869	0.664596	0.766567	0.502418	4441	tags=41%, list=36%, signal=26%	5337/1956/5321/5578/113/817/108/51806/5606/123745/91860/5579/5608/815/6654/4323/1839/23236/5330/109/5332/2185/5594/5338/468/805/3845/4313/1432
hsa04340	Hedgehog signaling pathway	36	0.194403	0.843846	0.665323	0.766567	0.502418	1288	tags=17%, list=10%, signal=15%	23432/5727/6608/91653/2619/132884
hsa04911	Insulin secretion	63	0.172407	0.849123	0.668782	0.767771	0.503206	3836	tags=38%, list=31%, signal=26%	64764/3783/2740/5578/113/9586/817/108/3779/5579/483/3780/1131/3651/815/476/23236/5330/486/885/6262/109/5332/3782
hsa05210	Colorectal cancer	64	0.171161	0.848848	0.675472	0.772662	0.506412	1391	tags=16%, list=11%, signal=14%	1956/83439/5293/6932/6934/2069/5295/10000/7042/7046
hsa04713	Circadian entrainment	71	0.167636	0.854264	0.68323	0.778735	0.510392	3996	tags=39%, list=32%, signal=27%	5578/2982/113/59345/817/108/6263/2904/51806/91860/6261/5579/4543/2770/815/2983/2903/23236/5330/2793/6262/109/54331/5332/3762/55970/5594/8911
hsa00790	Folate biosynthesis	20	0.225254	0.818209	0.686944	0.780172	0.511334	3773	tags=45%, list=30%, signal=31%	8836/249/2643/250/55034/873/57016/231/8644
hsa05219	Bladder cancer	31	0.201638	0.83558	0.690707	0.781655	0.512306	5953	tags=68%, list=48%, signal=35%	1956/3576/1612/1871/4312/1839/1029/4318/1890/1950/5594/3845/4313/7380/5604/1870/4609/4893/1019/23604/6714
hsa04923	Regulation of lipolysis in adipocytes	39	0.189051	0.831544	0.697706	0.786775	0.515662	1204	tags=15%, list=10%, signal=14%	5743/5293/113/5295/10000/108
hsa00330	Arginine and proline metabolism	31	0.194981	0.807994	0.726768	0.816651	0.535243	4808	tags=52%, list=39%, signal=32%	6303/4953/5033/54498/219/8974/384/4129/51056/1158/112849/26/5625/4842/5832/84735
hsa00592	alpha-Linolenic acid metabolism	18	0.212257	0.751115	0.785714	0.875551	0.573847	1589	tags=22%, list=13%, signal=19%	5321/151056/9415/123745
hsa04724	Glutamatergic synapse	83	0.150776	0.79014	0.787313	0.875551	0.573847	2184	tags=20%, list=18%, signal=17%	5337/5321/5578/113/6511/59345/2744/10991/108/6507/2904/123745/773/5579/2770/9454/9456
hsa04720	Long-term potentiation	52	0.160869	0.763457	0.789542	0.875551	0.573847	4180	tags=38%, list=34%, signal=26%	5578/6197/5500/817/2904/5502/51806/91860/5579/815/2903/5906/5534/23236/5330/5332/5594/468/805/3845
hsa04261	Adrenergic signaling in cardiomyocytes	113	0.146266	0.810287	0.791262	0.875551	0.573847	4576	tags=43%, list=37%, signal=28%	64764/5523/5578/113/5500/9586/817/6331/10000/108/5521/5502/51806/91860/2770/183/483/5294/7139/815/23533/492/476/27091/3753/6546/23236/5330/486/493/6262/109/5332/7169/4625/5594/7168/782/468/7171/3784/805/481/154/1432/4633/491/1385/488
hsa05220	Chronic myeloid leukemia	59	-0.135315	-0.810501	0.792952	0.875551	0.573847	1347	tags=17%, list=11%, signal=15%	1487/3551/2885/572/3265/5595/10912/595/4193/25759
hsa00620	Pyruvate metabolism	25	0.188151	0.73392	0.80086	0.881223	0.577564	3351	tags=36%, list=27%, signal=26%	4199/3939/92483/219/5315/5160/1737/2271/4200
hsa00071	Fatty acid degradation	27	0.179849	0.721501	0.815493	0.892878	0.585203	2286	tags=22%, list=18%, signal=18%	51703/2182/2180/33/1962/219
hsa04070	Phosphatidylinositol signaling system	72	0.147741	0.750922	0.817839	0.892878	0.585203	1846	tags=18%, list=15%, signal=15%	5578/5293/5336/8898/3613/1608/5295/51806/91860/5288/5579/3635/253430
hsa03022	Basal transcription factors	22	-0.165381	-0.735851	0.819876	0.892878	0.585203	3929	tags=50%, list=32%, signal=34%	8148/6879/728340/1022/404672/9569/51616/4331/2962/6880/902
hsa04975	Fat digestion and absorption	28	-0.154392	-0.757963	0.823729	0.894013	0.585947	10512	tags=29%, list=85%, signal=4%	8694/81579/391013/8399/2806/335/29881/10999
hsa00260	Glycine, serine and threonine metabolism	25	0.181753	0.708965	0.833811	0.901877	0.591101	254	tags=8%, list=2%, signal=8%	29968/26227
hsa04728	Dopaminergic synapse	91	0.140117	0.749491	0.849938	0.912757	0.598232	1861	tags=18%, list=15%, signal=15%	64764/5523/5578/84152/5500/59345/9586/817/10000/2904/5521/51806/91860/773/5579/2770
hsa04740	Olfactory transduction	78	0.142751	0.739182	0.851621	0.912757	0.598232	7744	tags=77%, list=62%, signal=29%	1258/5997/817/5137/51806/91860/123041/4992/83988/26659/390077/815/56656/2774/390072/26496/6546/109/219960/805/219432/390445/120065/125963/26219/26664/284433/6547/390036/409/390083/157/81341/338755/390075/810/79549/818/8392/120793/219865/130075/79473/120796/283694/4994/5153/26648/219968/120066/4995/7932/79295/392391/3000/391189/127064/255725/156/81127
hsa04976	Bile secretion	49	0.153826	0.719236	0.85248	0.912757	0.598232	3647	tags=31%, list=29%, signal=22%	6523/366/10257/113/108/483/6579/1244/476/949/1080/1581/486/200931/109
hsa03450	Non-homologous end-joining	10	-0.207571	-0.685423	0.856749	0.914249	0.59921	9849	tags=100%, list=79%, signal=21%	64421/5591/2547/2237/3981/7518/10111/27434/27343
hsa03040	Spliceosome	81	-0.119444	-0.774452	0.880597	0.935473	0.61312	10368	tags=98%, list=83%, signal=16%	4116/11157/10946/10929/57461/8559/9939/23450/84950/6637/6434/5356/494115/10450/51503/4809/220988/100534599/10262/6627/55660/6432/23350/55110/10285/22916/10286/9129/10189/6428/10291/51362/57819/51639/988/83443/10713/6632/3312/22938/10084/1655/6628/199746/153527/3304/27339/25766/3183/10594/6633/3306/11017/25949/55696/6431/11325/8896/9416/144983/8175/11338/25804/8683/3303/1659/26121/29896/27258/7919…
hsa03440	Homologous recombination	25	0.171712	0.669798	0.882521	0.935473	0.61312	7304	tags=76%, list=59%, signal=31%	5890/4361/472/29935/675/10714/6117/4683/7516/7979/8438/11073/5888/580/641/8940/79184/6742/9577
hsa00591	Linoleic acid metabolism	18	0.169037	0.598171	0.916667	0.968439	0.634726	1589	tags=17%, list=13%, signal=15%	5321/151056/123745
hsa04726	Serotonergic synapse	75	0.127535	0.654196	0.932836	0.96996	0.635724	3772	tags=32%, list=30%, signal=22%	5321/5578/5743/351/59345/3359/123745/773/5579/3356/240/2770/1644/23236/5330/5742/4129/2793/1562/3362/54331/5332/3762/55970
hsa04120	Ubiquitin mediated proteolysis	85	0.12391	0.654806	0.939951	0.96996	0.635724	1718	tags=13%, list=14%, signal=11%	4281/10477/330/8651/5371/6502/7321/9021/329/51465/7325
hsa03430	Mismatch repair	16	-0.150616	-0.588593	0.94012	0.96996	0.635724	10557	tags=100%, list=85%, signal=15%	9156/29935/2956/10714/6117/4436/5983/5982/6742/4437/27030/5425/4292/57804/3978
hsa00564	Glycerophospholipid metabolism	66	0.127241	0.634228	0.940731	0.96996	0.635724	4474	tags=38%, list=36%, signal=24%	5337/5321/56895/54947/23175/1608/151056/123745/9791/79888/26279/56261/160851/9468/8613/5130/5320/9162/84803/3931/5338/253558/43/5322/1103
hsa04114	Oocyte meiosis	80	-0.109497	-0.709416	0.941176	0.96996	0.635724	1288	tags=14%, list=10%, signal=12%	808/3708/112/107/367/5595/3480/29882/132864/816/5518
hsa00531	Glycosaminoglycan degradation	10	0.190837	0.559473	0.943662	0.96996	0.635724	1844	tags=20%, list=15%, signal=17%	10855/411
hsa04710	Circadian rhythm	20	-0.138782	-0.593515	0.945122	0.96996	0.635724	2570	tags=30%, list=21%, signal=24%	8553/1408/5571/8945/6500/5564
hsa00650	Butanoate metabolism	17	-0.147405	-0.592891	0.945402	0.96996	0.635724	10597	tags=41%, list=85%, signal=6%	7915/116285/622/35/1892/18/3155
hsa00513	Various types of N-glycan biosynthesis	25	0.147904	0.576928	0.945559	0.96996	0.635724	2975	tags=28%, list=24%, signal=21%	83539/4245/3703/2683/1650/6184/10195
hsa04330	Notch signaling pathway	37	0.129367	0.565359	0.954847	0.975668	0.639465	708	tags=8%, list=6%, signal=8%	84441/23220/4851
hsa00510	N-Glycan biosynthesis	36	0.129407	0.561718	0.959677	0.975668	0.639465	2975	tags=22%, list=24%, signal=17%	6480/4248/4245/3703/2683/1650/6184/10195
hsa03015	mRNA surveillance pathway	57	0.12142	0.589081	0.965296	0.975668	0.639465	6017	tags=53%, list=48%, signal=27%	5523/132430/5500/5521/4116/26986/55916/10978/8761/5042/9939/26019/23381/8732/11051/2107/80335/55339/23708/64895/55110/5527/53981/5529/5519/22916/23049/10767/10189/65109
hsa00450	Selenocompound metabolism	12	0.17176	0.52995	0.965354	0.975668	0.639465	263	tags=8%, list=2%, signal=8%	9060
hsa04130	SNARE interactions in vesicular transport	20	-0.133963	-0.572904	0.966463	0.975668	0.639465	1366	tags=15%, list=11%, signal=13%	662/53407/6844
hsa05030	Cocaine addiction	38	0.119812	0.525283	0.970667	0.976656	0.640112	6160	tags=55%, list=50%, signal=28%	64764/84152/9586/2904/2770/6531/1644/2903/4129/116443/468/1385/4790/2912/3725/7054/84699/116444/5173/2773/2906
hsa04914	Progesterone-mediated oocyte maturation	64	0.113555	0.563159	0.973585	0.976656	0.640112	1204	tags=11%, list=10%, signal=10%	8900/5293/113/6197/5295/10000/108
hsa00900	Terpenoid backbone biosynthesis	12	0.154287	0.47604	0.984252	0.984252	0.645091	1775	tags=17%, list=14%, signal=14%	116150/23590

## Sheet: GSEA_GO
GSEA_GO
ONTOLOGY	ID	Description	setSize	enrichmentScore	NES	pvalue	p.adjust	qvalues	rank	leading_edge	core_enrichment
BP	GO:0001932	regulation of protein phosphorylation	996	0.281305	1.93324	0.001002	0.011147	0.00739296	3447	tags=38%, list=28%, signal=30%	25937/3383/1116/4281/116379/1946/55765/8837/4067/2633/6364/136/1956/140885/2244/10333/8440/79616/1906/6422/355/3570/84451/6376/5621/2266/5912/4690/59341/84959/54757/22943/152007/8767/1969/1756/1852/146433/5329/23603/5997/9966/3600/54541/197259/8685/3976/26191/23566/5578/5743/6662/7525/3574/85450/3592/8900/84830/54763/6278/6288/2950/51704/6347/7128/55816/7453/135228/151195/4057/6386/5629/2651/650/…
BP	GO:0071495	cellular response to endogenous stimulus	931	0.216561	1.48502	0.001002	0.011147	0.00739296	4074	tags=39%, list=33%, signal=29%	1051/3383/445/9076/4478/11240/1946/114907/6715/5142/8837/4067/1956/2244/10333/3576/1906/9982/6422/10135/301/5621/53335/4690/2348/2296/58528/5465/22943/8767/56963/56975/837/2740/7101/54541/26191/688/3371/5743/50515/6662/7525/5251/5962/366/84830/677/2950/133522/5796/1520/824/6347/4052/9420/55553/135228/6386/2651/650/85377/79674/245973/3718/55612/8651/10251/60/23175/3987/8200/5371/5031/5457/4851/113…
BP	GO:0051094	positive regulation of developmental process	966	0.281179	1.92952	0.00100301	0.011147	0.00739296	4215	tags=46%, list=34%, signal=33%	6648/1051/8842/25937/1116/6280/168455/133/1946/7097/8531/8837/4067/64581/2244/3556/3576/1906/9982/6422/140578/301/3570/64764/6376/2266/7037/864/4690/1545/2296/8437/6281/3620/2824/54149/22943/152007/8767/56975/146433/23603/5997/8326/8876/3600/7101/3696/401138/3976/23566/3091/5578/688/5743/6662/8740/3574/3592/51083/677/133522/306/10562/338382/824/115004/9334/51704/7128/8808/51129/55553/11197/6934/4…
BP	GO:0010648	negative regulation of cell communication	899	0.247551	1.69356	0.00100402	0.011147	0.00739296	3693	tags=39%, list=30%, signal=29%	6648/25937/3383/1827/133/4233/11240/8531/8837/4067/2633/1956/140885/2244/10333/8440/3576/1906/6422/355/6376/2023/5621/2266/4690/597/8437/84959/79931/22943/1969/1852/5329/5997/8326/8876/7850/55343/3958/54541/3976/26191/3091/5743/7091/50515/6662/3574/85450/9404/2950/56033/23432/338382/7128/4052/9420/139285/11197/9516/135228/23198/6934/4057/222487/650/6615/79674/9258/8898/55612/8651/10251/4321/6496/…
BP	GO:0023057	negative regulation of signaling	902	0.248497	1.69992	0.00100402	0.011147	0.00739296	3693	tags=39%, list=30%, signal=30%	6648/25937/3383/1827/133/4233/11240/8531/8837/4067/2633/1956/140885/2244/10333/8440/3576/1906/6422/355/6376/2023/5621/2266/4690/597/8437/84959/79931/22943/1969/1852/5329/5997/8326/8876/7850/55343/3958/54541/3976/26191/3091/5743/7091/50515/6662/3574/85450/9404/2950/56033/23432/338382/7128/4052/9420/139285/11197/9516/135228/23198/6934/4057/222487/650/6615/79674/9258/8898/55612/8651/10251/4321/6496/…
BP	GO:0031401	positive regulation of protein modification process	852	0.272905	1.86496	0.00100402	0.011147	0.00739296	3577	tags=39%, list=29%, signal=30%	3383/1116/4281/1946/55765/8837/4067/6364/136/1956/2244/10333/1906/9111/355/23551/3570/84451/6376/5621/2266/5912/59341/57162/54757/22943/152007/8767/1852/146433/5329/9966/3600/197259/8685/3976/26191/23566/5578/5743/330/6662/7525/83593/3592/84830/6278/6288/51704/6347/55816/139285/151195/4057/6386/5629/2651/650/1230/7436/9258/284/8651/3656/6355/26525/3965/8200/5031/57561/4851/4217/302/10010/113/9294…
CC	GO:0044432	endoplasmic reticulum part	946	0.214139	1.4688	0.00100402	0.011147	0.00739296	3655	tags=36%, list=29%, signal=27%	1356/157506/1183/3294/83850/196996/5337/6715/51302/153830/51703/1956/64078/1906/140578/64764/2266/2348/3601/1545/966/7364/5321/1075/80339/4240/2182/56975/837/5329/8326/7018/5352/401138/26031/3371/5743/79054/3592/3930/57348/285533/56895/824/56648/4052/9420/54947/10130/6386/1286/5954/286410/285203/7475/57158/30001/84141/55214/4241/6446/6646/23175/23120/51700/3134/5371/10479/10232/57194/5351/4851/42…
BP	GO:0045321	leukocyte activation	948	0.436759	2.99631	0.00100402	0.011147	0.00739296	4011	tags=59%, list=32%, signal=43%	1051/3383/1116/6280/3934/27242/6590/4478/11240/7097/5337/3929/5005/4067/2919/3459/6279/136/1525/5004/64581/140885/10333/8440/3576/1906/57115/154064/79679/23200/6422/10135/301/3570/6376/5621/5912/7037/864/4690/966/7096/30817/57162/79465/5806/1075/3620/965/8767/1021/10537/5359/6518/5329/8326/8876/3600/3958/6282/26191/8934/10577/80380/5284/11010/7525/8740/3574/3592/80328/51083/6278/677/2950/306/1056…
BP	GO:0051336	regulation of hydrolase activity	882	0.233741	1.59826	0.00100402	0.011147	0.00739296	3959	tags=40%, list=32%, signal=29%	5918/3383/6280/6590/1827/81706/1946/8837/4067/6279/6364/1956/64581/9712/834/5266/6422/355/23092/301/144568/6376/27074/8437/5806/6281/3428/8767/1969/5359/837/5329/23603/5997/5523/26286/9966/1410/3958/6251/5743/728113/330/64065/1612/8740/5962/25816/710/27151/133522/6347/1476/653145/5271/51129/23216/135228/23198/4057/5268/650/116984/6355/114769/3965/112399/3987/26998/141/9628/5371/5031/117289/4217/1…
BP	GO:0034097	response to cytokine	883	0.400272	2.73658	0.00100503	0.011147	0.00739296	3456	tags=48%, list=28%, signal=37%	4783/6648/1051/3383/1116/3934/4281/27242/445/116379/9180/9076/8942/4478/11240/6374/7097/8531/3929/2919/3459/2633/3455/6364/140885/2244/834/3556/3576/1906/5214/8564/9111/6422/301/3570/5784/6376/2266/58191/7037/10402/3601/27074/2296/22808/57162/3428/2182/965/8767/10537/2634/5359/837/146433/3595/9966/7850/2921/3600/4261/3976/3091/5578/688/5743/330/7091/6662/1612/8740/3574/3592/6288/677/2950/338382/3…
BP	GO:0043085	positive regulation of catalytic activity	974	0.253891	1.74184	0.00100503	0.011147	0.00739296	4096	tags=43%, list=33%, signal=31%	1001/3383/1116/6280/1946/55765/8837/4067/2919/6279/6364/136/1956/64581/10333/9712/834/1906/6422/355/23092/3570/84451/6376/5621/8437/6281/54757/3428/22943/8767/1969/1852/5359/837/23603/5997/26286/9966/197259/6251/23566/3091/64065/1612/6288/133522/51704/6347/23216/151195/23198/4057/5629/650/7436/8543/284/116984/54704/8651/3656/6355/1907/3965/112399/3987/141/9628/5371/5031/117289/57561/4217/10010/11…
MF	GO:0060089	molecular transducer activity	823	0.345369	2.35573	0.00100503	0.011147	0.00739296	3498	tags=45%, list=28%, signal=34%	3383/114908/116379/9180/4233/7097/266977/3459/3455/136/57211/1956/64581/10333/3556/57115/2564/355/3570/23596/5621/2842/2348/3601/7096/2568/59341/30817/5465/4065/3112/1969/1021/56963/5329/8326/2740/5995/3595/7850/7101/2835/3696/8685/23566/5284/51083/23432/3604/5796/51704/4052/8808/5613/165829/976/222487/1230/7436/3872/53831/54210/2051/442197/9568/5817/53833/6869/9289/79627/2982/5031/8809/4851/2047…
BP	GO:0060429	epithelium development	837	0.273048	1.86501	0.00100503	0.011147	0.00739296	3128	tags=35%, list=25%, signal=28%	1051/1001/8842/25937/3383/157506/25984/9076/133/4478/4233/1956/3868/7052/1906/5266/6422/301/26298/25902/2348/2296/3855/2195/26227/22943/1969/1021/23581/8796/54101/3854/2001/56975/3887/768/5523/3853/3958/4643/56913/220/3976/1824/9333/3091/688/3371/6662/64065/5962/51083/6278/677/56033/23432/9095/1825/6768/51458/9420/5613/643414/135228/6932/23198/5629/5268/1286/4781/650/1830/6615/2939/7475/3872/2868…
CC	GO:0098590	plasma membrane region	822	0.21865	1.49124	0.00100503	0.011147	0.00739296	4224	tags=42%, list=34%, signal=30%	8842/10568/9180/9076/59272/4478/4233/1946/5337/1956/1525/2564/117247/301/4651/3570/6523/7037/2348/2568/1258/59341/30817/2195/115019/1969/1756/6518/768/5329/23603/8326/7018/1410/1259/5743/6530/5962/366/84830/50649/57348/23432/6768/51458/10257/10804/8898/399694/362/8061/8140/55612/9568/5873/9783/9132/5031/4851/302/5727/6608/91703/83959/64127/6557/7804/634/6511/22866/4025/952/23413/10991/27185/5144/…
BP	GO:0002252	immune effector process	876	0.419083	2.86463	0.00100604	0.011147	0.00739296	4011	tags=58%, list=32%, signal=42%	3383/1116/6280/3934/6590/11240/7097/5337/3929/5005/4067/2919/6279/2633/3455/722/136/5004/140885/57115/715/154064/23200/301/4651/716/5912/7037/4690/966/30817/79465/5806/1075/3428/965/8767/5359/6518/5329/8876/3600/3958/54541/6282/10577/3426/330/5284/11010/7525/3592/80328/710/6278/2950/306/10562/10346/1520/115004/51704/7128/1476/5236/4064/80329/146857/5293/5336/976/4057/6386/222487/23406/154664/9160…
BP	GO:0009968	negative regulation of signal transduction	831	0.25602	1.74679	0.00100604	0.011147	0.00739296	3692	tags=40%, list=30%, signal=30%	6648/25937/3383/1827/133/4233/11240/8531/8837/4067/2633/1956/140885/2244/10333/8440/3576/6422/355/6376/2023/5621/2266/4690/597/8437/84959/79931/22943/1969/1852/5329/5997/8326/8876/7850/55343/3958/54541/3976/26191/3091/5743/7091/50515/6662/3574/85450/9404/2950/56033/23432/338382/7128/4052/9420/139285/11197/9516/135228/23198/6934/4057/222487/650/6615/79674/9258/8898/55612/8651/10251/4321/6496/26525…
CC	GO:0030054	cell junction	888	0.228236	1.55991	0.00100604	0.011147	0.00739296	3240	tags=33%, list=26%, signal=26%	1001/3383/6280/23650/9076/4478/10686/1946/8531/4067/1956/1525/7052/23034/2564/10135/23092/301/6523/5912/4690/22800/966/2568/59341/2195/9019/1969/1756/5329/23603/2173/3696/4643/6282/401138/6251/1824/3371/26136/23336/25996/7525/64065/5962/9404/6278/1466/5796/824/1825/976/6386/1830/10804/11135/399694/3801/55612/9568/2707/60/5817/3987/10096/9783/7159/4851/302/5754/4311/6566/23562/634/154796/3815/2851…
BP	GO:0051241	negative regulation of multicellular organismal process	840	0.311205	2.12642	0.00100604	0.011147	0.00739296	4094	tags=47%, list=33%, signal=34%	1001/27242/133/7097/5142/8531/3929/4067/3459/2633/136/1956/5004/140885/2244/10333/1906/57115/9111/6422/301/6376/5621/2266/864/53335/2296/59341/5465/1075/84959/81618/3620/22943/1969/1021/56963/5329/23603/5997/7850/3600/7101/26191/8934/3091/80380/5743/6662/3592/84830/51083/710/677/2950/3475/23432/7128/55553/4057/4781/650/6615/1230/3718/8898/3400/284/55612/8651/6496/26525/114769/3965/53833/8200/9289…
BP	GO:1901701	cellular response to oxygen-containing compound	793	0.291784	1.98568	0.00100705	0.011147	0.00739296	4354	tags=48%, list=35%, signal=34%	6648/1051/3383/3934/445/9076/4478/4233/1946/6374/7097/114907/6715/5142/3929/8837/4067/2919/1956/64581/140885/10333/834/3576/1906/8564/6422/10135/301/6376/5621/53335/4690/2348/1545/58528/79931/8767/6518/837/2740/2921/3600/54541/26191/3091/80380/5578/688/3371/5743/6662/7525/1612/5251/3592/366/677/2950/133522/5796/824/6347/7128/4064/9516/4057/6372/2920/10804/245973/3718/7475/8651/3656/2707/60/26525/…
BP	GO:0002684	positive regulation of immune system process	815	0.443174	3.0177	0.00100806	0.011147	0.00739296	3500	tags=54%, list=28%, signal=42%	3383/6280/27242/7097/5142/55765/3929/4067/6279/2633/722/6364/136/64581/140885/2244/10333/8440/3576/1906/57115/715/154064/79679/301/4651/3570/5621/716/2266/7037/864/4690/966/7096/2296/59341/30817/57162/79465/3783/1075/118788/79931/3428/3620/8767/5359/146433/8876/94025/3600/3958/8685/3976/26191/8934/3091/80380/5578/9473/3426/330/7525/8740/3574/3592/80328/9404/710/6278/677/133522/338382/1520/115004/…
BP	GO:0006812	cation transport	789	0.238625	1.6231	0.00100806	0.011147	0.00739296	3483	tags=37%, list=28%, signal=28%	1356/3383/51312/154091/10568/1183/59272/10686/196996/55240/5142/4067/6564/8645/55503/6769/64078/3787/1906/6376/6523/5621/7037/1258/59341/3783/84959/342667/2824/1756/221074/90019/5997/23007/7018/3958/23566/1259/5743/79054/6530/3755/1612/51083/306/57348/1520/6347/51458/11182/5336/79815/1230/245973/57158/30001/8140/6355/4241/53827/6446/341208/9132/5371/10479/5031/302/348938/5270/79041/83959/353514/3…
BP	GO:0010562	positive regulation of phosphorus metabolic process	781	0.302093	2.05431	0.00100806	0.011147	0.00739296	3553	tags=42%, list=29%, signal=32%	3383/1116/4281/1946/55765/8837/4067/6364/136/1956/2244/10333/1906/355/3570/84451/6376/2023/5621/2266/5912/59341/54757/22943/152007/8767/1852/146433/5329/9966/3600/197259/8685/3976/26191/23566/3091/5578/5743/6662/7525/3592/84830/6278/6288/133522/824/51704/6347/55816/151195/4057/6386/5629/2651/650/1230/7436/9258/8543/284/8651/3656/6355/26525/3965/8200/5031/4851/4217/302/113/9294/8792/285016/353514/…
BP	GO:0032989	cellular component morphogenesis	796	0.222498	1.51349	0.00100806	0.011147	0.00739296	4248	tags=42%, list=34%, signal=30%	1001/3383/4478/4233/1946/7097/8837/2633/1956/2244/1906/140578/301/3914/4651/114793/2266/53335/8437/7368/6281/2195/22943/1969/23603/7101/23566/5578/5962/3918/221061/1466/3475/10562/9334/6347/55816/6768/5293/55553/5629/1286/4781/26050/7436/8898/11135/201294/2051/60/4241/6446/65249/3987/10479/5457/57194/4851/2047/5727/6608/2131/91653/6285/400746/9519/7804/64919/3815/10413/28513/87/351/390/59352/5080…
BP	GO:0034220	ion transmembrane transport	801	0.218477	1.48645	0.00100806	0.011147	0.00739296	3483	tags=35%, list=28%, signal=27%	11254/51312/154091/10568/1183/10686/55240/5142/4067/6564/8645/55503/6769/64078/3787/2564/117247/23200/6376/5621/2348/2568/1258/59341/3783/84959/115019/342667/1756/221074/5997/23007/7018/1259/79054/3755/1612/366/51083/306/57348/1520/6347/51458/11182/5336/10257/80727/79815/154664/286410/245973/57158/30001/8140/53827/6446/9132/10479/5031/57194/302/6891/348938/79041/83959/6566/3627/6557/6890/344905/6…
MF	GO:0038023	signaling receptor activity	782	0.355479	2.41672	0.00100806	0.011147	0.00739296	3539	tags=46%, list=28%, signal=35%	3383/114908/116379/9180/4233/7097/266977/3459/3455/136/57211/1956/64581/10333/3556/57115/2564/355/3570/23596/5621/2842/2348/3601/7096/2568/59341/30817/5465/4065/3112/1969/56963/5329/8326/2740/5995/3595/7850/7101/2835/3696/8685/23566/5284/51083/23432/3604/5796/51704/4052/8808/165829/976/222487/1230/7436/3872/53831/54210/2051/442197/9568/5817/53833/6869/9289/79627/2982/5031/8809/4851/2047/5727/6608…
BP	GO:0045937	positive regulation of phosphate metabolic process	781	0.302093	2.05431	0.00100806	0.011147	0.00739296	3553	tags=42%, list=29%, signal=32%	3383/1116/4281/1946/55765/8837/4067/6364/136/1956/2244/10333/1906/355/3570/84451/6376/2023/5621/2266/5912/59341/54757/22943/152007/8767/1852/146433/5329/9966/3600/197259/8685/3976/26191/23566/3091/5578/5743/6662/7525/3592/84830/6278/6288/133522/824/51704/6347/55816/151195/4057/6386/5629/2651/650/1230/7436/9258/8543/284/8651/3656/6355/26525/3965/8200/5031/4851/4217/302/113/9294/8792/285016/353514/…
BP	GO:0048878	chemical homeostasis	803	0.25229	1.7166	0.00100806	0.011147	0.00739296	2977	tags=33%, list=24%, signal=27%	1356/6648/3383/6280/3934/51312/10568/9076/133/10686/4233/1946/55240/25825/4067/51302/6279/57217/55503/1956/3868/7052/7851/1906/6376/5621/7037/1258/59341/158219/84959/54757/80339/9388/1756/221074/8326/23007/2740/7018/2835/23566/3091/10577/79054/366/6288/2950/56648/51458/9420/51129/5336/6934/4057/1230/10804/245973/57158/30001/23075/6355/1907/4241/6646/6869/341208/5371/10479/5031/29841/57476/302/113…
BP	GO:0071345	cellular response to cytokine stimulus	815	0.406902	2.77072	0.00100806	0.011147	0.00739296	3517	tags=49%, list=28%, signal=38%	4783/6648/1051/3383/1116/3934/4281/27242/445/116379/9180/9076/4478/11240/6374/7097/8531/3929/2919/3459/2633/3455/6364/140885/2244/834/3556/3576/1906/5214/8564/9111/6422/301/3570/5784/6376/2266/7037/10402/3601/2296/22808/57162/3428/965/8767/2634/837/146433/3595/9966/7850/2921/3600/4261/3976/3091/688/5743/330/7091/6662/1612/8740/3574/3592/6288/677/2950/338382/3604/10346/824/6347/7128/8808/5293/6932…
BP	GO:0009607	response to biotic stimulus	696	0.416252	2.81788	0.00100908	0.011147	0.00739296	2997	tags=46%, list=24%, signal=37%	1051/3383/6280/3934/6590/445/9076/133/6374/7097/5142/55765/3929/8837/4067/2919/3459/6279/2633/3455/722/6364/64581/140885/2244/10333/834/3576/1906/57115/8564/5266/79679/3570/6376/2023/1672/4690/7096/57162/5806/79931/54757/3428/3620/8767/1969/1021/2634/5359/3595/2921/3600/3853/54541/26191/8934/10577/80380/5578/5743/330/3592/6278/2950/306/10346/824/115004/6347/7128/4064/146857/5336/9516/4057/23406/9…
BP	GO:0045597	positive regulation of cell differentiation	698	0.280028	1.89548	0.00100908	0.011147	0.00739296	4215	tags=46%, list=34%, signal=32%	6648/1051/8842/25937/6280/168455/133/1946/7097/8837/4067/64581/2244/1906/6422/140578/301/3570/64764/6376/2266/864/4690/2296/8437/6281/54149/22943/152007/8767/56975/146433/5997/8876/3600/3976/23566/3091/5578/688/5743/6662/8740/3574/3592/677/133522/10562/338382/824/51704/8808/55553/11197/6934/4057/6386/5629/2651/650/6615/1230/286410/7436/201294/2119/8651/3965/3987/8200/5457/4851/4217/302/5727/6608/…
BP	GO:0000902	cell morphogenesis	726	0.226675	1.53526	0.0010101	0.011147	0.00739296	4248	tags=43%, list=34%, signal=30%	1001/3383/4478/4233/1946/2633/1956/2244/140578/301/3914/4651/114793/2266/53335/8437/7368/6281/2195/22943/1969/23603/7101/23566/5578/5962/3918/221061/3475/10562/9334/6347/55816/6768/5293/55553/5629/1286/4781/26050/7436/11135/201294/2051/60/4241/6446/65249/3987/10479/5457/57194/4851/2047/5727/6608/2131/91653/6285/7804/64919/3815/10413/28513/87/351/390/59352/5080/5588/7852/1761/6696/27185/3575/6354/…
BP	GO:0009887	animal organ morphogenesis	731	0.269994	1.82932	0.0010101	0.011147	0.00739296	3113	tags=35%, list=25%, signal=28%	1051/8842/25937/157506/133/4478/8837/121227/57211/1956/7052/1906/6422/3914/25902/2348/2296/59341/5465/2195/54757/22943/1969/56975/401138/220/3976/3091/3371/50515/6662/64065/3574/5251/3198/3918/9313/133522/6347/7128/9095/9420/5613/2267/6932/23198/4057/5629/5268/4781/650/6615/10804/7475/3400/362/2119/6496/8463/9132/5371/5457/4851/2047/302/5727/6608/7088/5754/2627/7545/2734/5698/64919/634/2069/84159…
BP	GO:0032269	negative regulation of cellular protein metabolic process	703	0.226131	1.52989	0.0010101	0.011147	0.00739296	3050	tags=30%, list=25%, signal=24%	5918/135112/25937/6590/81706/8837/4067/2633/722/10644/140885/8440/1906/5266/23034/6422/144568/23551/5621/4690/966/27074/84959/3428/22943/1756/1852/5329/23603/5997/7850/1410/3958/54541/3976/26191/5743/728113/330/1612/8740/85450/25816/710/27151/677/2950/7128/1476/653145/5271/7453/135228/4057/6386/5268/9258/284/23075/8651/10251/64359/114769/11329/26998/5371/302/84152/338761/5270/678/2734/6318/6197/3…
BP	GO:0032880	regulation of protein localization	716	0.238699	1.61676	0.0010101	0.011147	0.00739296	4132	tags=43%, list=33%, signal=30%	27242/23650/4478/1946/7097/5005/4067/3459/2633/1956/6769/5004/2244/10333/834/3556/79679/6422/301/5784/6376/5621/2266/7096/59341/3783/342667/2824/965/8767/1969/8326/2740/7850/3958/3976/26191/8934/3091/5578/5743/83593/5962/84830/6288/10346/7128/23216/6934/9258/284/23075/55612/8651/4321/57707/60/26525/114769/3965/5371/7159/5727/6608/9447/7545/353514/6566/64127/5552/3553/79628/7447/5208/55432/3002/31…
BP	GO:0035295	tube development	712	0.288973	1.9565	0.0010101	0.011147	0.00739296	3904	tags=44%, list=31%, signal=32%	8842/25937/1116/157506/445/133/4233/1956/7052/3576/1906/9982/6422/301/6376/25902/2348/1545/2296/26227/4240/1969/7101/3696/4643/9444/56913/3976/3091/5578/688/3371/5743/6662/5251/84830/3198/6278/677/306/23432/6347/7128/6768/5613/51129/7453/6932/9047/5629/1286/4781/650/7475/8543/284/2119/2019/10855/8463/1907/9289/5371/51696/4851/2047/302/5727/6608/5754/2627/4311/5270/2300/6303/3627/7127/3553/634/154…
BP	GO:0042493	response to drug	712	0.224795	1.52198	0.0010101	0.011147	0.00739296	2763	tags=28%, list=22%, signal=23%	1001/3383/3934/445/9076/8942/4233/1946/7097/114907/6715/5142/55765/8837/4067/6279/1956/140885/1906/6422/301/5621/7037/53335/2348/1545/5465/6281/123/8767/90019/768/5997/1410/54541/26191/3371/5743/6530/6662/51083/2950/824/7128/10257/362/8061/8140/60/4851/4217/84152/113/5727/2627/9447/79041/83959/64127/56833/4257/3553/7804/6511/10413/7124/100/7852/148641/952/10991/26291/7412/6354/4837/3359/5562/1128…
MF	GO:0044877	protein-containing complex binding	756	0.220357	1.4947	0.0010101	0.011147	0.00739296	4452	tags=42%, list=36%, signal=29%	3383/7097/8531/8837/4067/57211/1956/1525/8440/5214/3914/4651/6376/5621/59341/5465/4240/3112/10537/23603/1410/3958/4261/7087/3696/4643/197259/8934/5578/23336/1520/56648/653145/139285/5358/23198/23406/7436/25975/3108/55612/4321/60/9289/10096/2047/5727/9294/3640/64127/3553/7804/87/8838/2247/3133/59345/1515/5317/3983/10516/10457/6696/5771/7045/64135/27185/7412/972/5292/3694/5295/441925/10288/3689/515…
BP	GO:0048646	anatomical structure formation involved in morphogenesis	758	0.286448	1.94316	0.0010101	0.011147	0.00739296	3975	tags=44%, list=32%, signal=32%	8842/1116/157506/133/7097/8837/57211/7052/3576/1906/9982/6422/301/3914/5784/6376/25902/2348/1545/2296/5465/7368/54757/4240/22943/1969/2001/56975/7101/3696/401138/56913/220/3091/5578/688/5743/6662/64065/8740/84830/3198/6278/1466/9313/133522/306/824/6347/7128/9095/6768/5613/51129/7453/135228/9047/5629/1286/4781/6615/7475/8898/8543/201294/284/5460/10855/8463/9289/10673/5371/4851/2047/302/5727/6608/5…
BP	GO:0050776	regulation of immune response	761	0.447551	3.03779	0.0010101	0.011147	0.00739296	3500	tags=55%, list=28%, signal=42%	3383/6280/27242/7097/5142/55765/3929/4067/3459/6279/2633/3455/722/136/1525/64581/2244/10333/57115/715/154064/79679/9111/301/4651/3570/5621/716/2266/7037/4690/966/7096/30817/57162/79465/3783/118788/79931/3428/3620/8767/5359/94025/3600/3958/7087/8685/26191/8934/9473/3426/330/342510/5284/7525/3592/80328/9404/710/338382/1520/115004/51704/7128/143662/80329/5293/2267/5336/23198/4057/124976/9258/3718/20…
BP	GO:0072359	circulatory system development	716	0.294345	1.99366	0.0010101	0.011147	0.00739296	4457	tags=49%, list=36%, signal=33%	6648/1116/133/8837/57211/1956/1525/3576/1906/9982/6422/301/3570/5784/6376/2348/1545/2296/5465/4240/22943/1969/5997/7101/3696/4643/9444/56913/3976/3091/5578/688/5743/6662/84830/3198/6278/677/306/6347/7128/9095/4052/5613/51129/55553/7453/6934/9047/5629/1286/650/6615/26050/57158/8543/284/8061/10855/8463/64359/9289/5371/5457/4851/2047/302/5727/6608/5754/2627/2300/6303/3627/7127/3553/634/154796/3815/2…
CC	GO:0099503	secretory vesicle	693	0.295923	2.00179	0.0010101	0.011147	0.00739296	4095	tags=47%, list=33%, signal=34%	1116/6280/3934/6590/11240/7097/5337/5142/25825/55784/5005/2919/6279/1525/5004/140885/2244/1906/23200/2266/5912/966/27074/5806/1075/965/90019/6518/5329/8876/7018/3958/6282/10577/5284/11010/51083/710/6278/2950/306/10562/1520/5653/1476/5236/135228/976/10257/4057/6386/222487/23406/154664/8898/53831/201294/5873/10855/4851/302/4311/5270/4688/4257/5552/3553/5655/634/3815/11025/10184/87/1265/351/26002/67…
BP	GO:1901698	response to nitrogen compound	719	0.224454	1.52011	0.0010101	0.011147	0.00739296	4145	tags=40%, list=33%, signal=29%	1051/3383/445/8942/133/7097/6715/5142/55765/8837/4067/1956/10333/1906/6422/10135/301/5621/53335/4690/2348/58528/59341/57162/5465/342897/8767/837/5997/2740/26191/688/5743/6662/5251/366/84830/51083/677/2950/133522/285533/824/115004/7128/10257/245973/3718/8061/8651/4321/57707/60/23175/5031/4851/4217/84152/113/79041/64127/4257/3553/634/2069/694/55432/351/5641/7124/100/5588/7852/26291/5771/64135/7412/…
BP	GO:0001934	positive regulation of protein phosphorylation	708	0.30703	2.07799	0.00101112	0.011147	0.00739296	3553	tags=42%, list=29%, signal=32%	3383/1116/4281/1946/55765/8837/4067/6364/136/1956/2244/10333/1906/355/3570/84451/6376/5621/2266/5912/59341/54757/22943/152007/8767/1852/146433/5329/9966/3600/197259/8685/3976/26191/23566/5578/5743/6662/7525/3592/84830/6278/6288/51704/6347/55816/151195/4057/6386/5629/2651/650/1230/7436/9258/284/8651/3656/6355/26525/3965/8200/5031/4851/4217/302/113/9294/8792/285016/353514/22998/64127/941/7164/3553/…
BP	GO:0007167	enzyme linked receptor protein signaling pathway	702	0.234353	1.58508	0.00101112	0.011147	0.00739296	4069	tags=42%, list=33%, signal=30%	1001/25937/4233/1946/4067/1956/8440/9982/6422/4690/2348/9508/2296/84959/22943/9019/1969/56963/56975/5329/54541/4643/3976/3091/5578/5284/50515/6662/7525/5796/4052/55816/135228/9542/9047/6386/2651/650/79674/245973/3718/2051/284/55612/8651/10251/60/8200/10096/5371/10479/4851/2047/4688/2734/2591/3553/634/3815/79628/2069/84159/57057/238/351/5641/2247/5588/7791/1761/26291/5771/5562/651/5295/5063/3486/4…
BP	GO:0007417	central nervous system development	684	0.229768	1.5534	0.00101112	0.011147	0.00739296	4079	tags=40%, list=33%, signal=28%	27242/1827/84002/11240/7097/6715/25825/8690/4067/3459/6279/1956/145864/6422/597/2296/7368/26227/139411/54149/22943/1021/146433/5997/2173/7101/54541/220/3976/3091/6662/2950/306/9334/161357/9095/5653/55553/5629/4781/650/26050/7436/8543/3400/6496/2019/60/9289/5457/4851/2047/85414/5727/6608/2131/5270/7545/30012/6285/6197/3553/7804/64919/84879/57057/238/351/4340/7124/4919/59345/5080/7852/10991/387804/…
BP	GO:0019725	cellular homeostasis	669	0.252219	1.70166	0.00101112	0.011147	0.00739296	3517	tags=38%, list=28%, signal=29%	1356/3383/6280/3934/10568/133/10686/1946/4067/6279/57217/55503/7052/1906/6376/5621/7037/1258/59341/3783/84959/1756/221074/8326/23007/2740/7018/2835/23566/3091/79054/6530/6288/6347/51458/5336/10130/4057/1230/10804/245973/57158/30001/23075/6355/1907/64359/6869/5371/10479/5031/10954/302/79041/83959/3627/56833/4688/6557/344905/55647/7447/351/4025/2247/4501/84561/7852/3759/952/23413/26291/817/27185/51…
BP	GO:0033993	response to lipid	669	0.306527	2.06806	0.00101112	0.011147	0.00739296	3150	tags=38%, list=25%, signal=30%	1051/3383/3934/6590/445/9076/3294/133/4478/11240/1946/6374/7097/114907/6715/5142/3929/8837/4067/2919/6279/1956/140885/834/3576/1906/8564/6422/301/6376/57162/5465/79931/3620/22943/8767/768/3595/2921/3600/7101/1410/54541/26191/80380/5578/3371/5743/6662/7525/5251/3592/84830/6278/677/2950/133522/306/824/6347/7128/9420/4064/5336/9516/4057/6372/2920/10804/7475/8061/3656/2707/26525/8463/114769/3965/5031…
BP	GO:0048534	hematopoietic or lymphoid organ development	669	0.343282	2.31604	0.00101112	0.011147	0.00739296	4010	tags=50%, list=32%, signal=36%	1051/7097/4067/2120/57217/57115/6422/301/7037/864/2296/84959/3428/8767/1969/1021/10537/56975/146433/8326/8876/3600/3958/4643/3976/26191/3091/5578/3574/3592/3930/677/56033/133522/338382/8808/5613/5293/55553/5336/135228/6932/23198/4057/222487/124976/1230/286410/9258/3718/8543/284/8651/8581/3965/5371/5457/8809/4851/302/8792/3559/2300/678/941/9308/56833/5698/64919/9119/634/3815/79705/11025/10413/87/3…
BP	GO:0051248	negative regulation of protein metabolic process	749	0.234842	1.59245	0.00101112	0.011147	0.00739296	3050	tags=31%, list=25%, signal=25%	5918/135112/25937/6590/81706/25825/8837/4067/2633/722/1956/10644/140885/8440/1906/5266/23034/9111/6422/144568/23551/5621/4690/966/27074/5806/84959/81618/3428/22943/1756/1852/5329/23603/5997/7850/1410/3958/54541/3976/26191/5743/728113/330/1612/8740/85450/25816/710/27151/677/2950/7128/1476/653145/5271/7453/135228/4057/6386/5268/9258/3718/284/23075/8651/10251/64359/114769/11329/26998/5371/302/84152/…
BP	GO:1902533	positive regulation of intracellular signal transduction	753	0.341972	2.31926	0.00101112	0.011147	0.00739296	2905	tags=40%, list=23%, signal=33%	3383/1116/6280/4281/4233/7097/55765/8837/4067/6279/6364/136/1956/2244/10333/834/8440/7052/1906/23551/3570/84451/6376/2266/4690/1545/58528/59341/57162/118788/22943/152007/8767/10537/1852/9966/3600/197259/8685/3976/26191/23566/5578/330/6662/8740/3592/6278/6288/10346/115004/51704/6347/55816/5293/9516/9542/6934/4057/6386/2651/650/1230/9258/57158/79156/284/8651/3656/6355/10855/26525/114769/3965/3987/9…
BP	GO:0002520	immune system development	705	0.347285	2.34879	0.00101215	0.011147	0.00739296	4010	tags=50%, list=32%, signal=36%	1051/7097/4067/2120/57217/57115/6422/301/7037/864/2296/84959/3428/3620/8767/1969/1021/10537/56975/146433/8326/8876/3600/3958/4643/3976/26191/3091/5578/3574/3592/3930/677/56033/133522/338382/7128/8808/5613/5293/55553/5336/135228/6932/23198/4057/222487/124976/1230/286410/9258/3718/8543/284/23075/8651/8581/3965/200558/5371/5457/8809/4851/302/8792/3559/2300/678/941/9308/56833/5698/64919/9119/634/3815…
BP	GO:0010243	response to organonitrogen compound	667	0.221167	1.49137	0.00101215	0.011147	0.00739296	4120	tags=40%, list=33%, signal=28%	1051/3383/445/8942/133/7097/6715/5142/55765/8837/4067/1956/10333/1906/6422/10135/301/5621/53335/4690/2348/58528/59341/5465/342897/8767/837/5997/2740/26191/688/5743/6662/5251/366/84830/51083/677/2950/133522/285533/824/7128/10257/245973/3718/8061/8651/4321/57707/60/23175/5031/4851/84152/113/79041/64127/4257/3553/634/2069/694/55432/351/5641/7124/100/5588/7852/26291/5771/7412/5144/4837/3359/5562/5295…
BP	GO:0022603	regulation of anatomical structure morphogenesis	739	0.269671	1.82676	0.00101215	0.011147	0.00739296	3964	tags=43%, list=32%, signal=31%	3383/1116/133/4478/1946/8837/2633/2244/3576/1906/9982/6422/140578/301/4651/6376/114793/2266/53335/1545/2296/8437/6281/22943/1969/23603/7101/3696/401138/3976/23566/3091/5578/5743/6662/8740/5962/51083/221061/9313/306/3475/10562/824/6347/7128/51129/7453/23198/5629/4781/650/7475/11135/201294/2119/4241/65249/3987/10673/5371/57194/4851/6608/5754/2627/3627/6285/3553/7804/5698/634/154796/3815/694/2247/71…
BP	GO:0030097	hemopoiesis	642	0.341205	2.29817	0.00101215	0.011147	0.00739296	3980	tags=49%, list=32%, signal=35%	1051/7097/4067/2120/57217/57115/6422/301/7037/864/2296/84959/3428/8767/1969/1021/10537/56975/146433/8326/8876/3600/3958/4643/3976/26191/3091/5578/3574/3592/3930/677/133522/338382/8808/5613/5293/55553/5336/135228/6932/23198/4057/222487/1230/286410/9258/3718/284/8651/8581/3965/5371/5457/8809/4851/302/8792/3559/678/941/9308/56833/5698/64919/9119/634/3815/79705/11025/10413/87/351/7124/150372/100/1160…
BP	GO:0040012	regulation of locomotion	705	0.324407	2.19406	0.00101215	0.011147	0.00739296	3553	tags=44%, list=29%, signal=34%	6648/3383/4478/4233/11240/3929/4067/6364/1956/3868/64581/3576/1906/9982/6422/301/3570/6376/1672/58191/5912/4690/22800/1545/59341/152007/1969/1021/23603/7101/3958/3091/5578/5743/6662/8740/5962/3592/84830/3918/6278/2950/306/5796/6347/5613/5293/9542/6386/222487/5629/2651/650/6615/1230/8543/284/23075/6355/57707/1907/6446/65249/3965/6869/9289/5371/5031/57561/4851/6608/3640/51072/5270/22998/3627/56833/…
BP	GO:0042327	positive regulation of phosphorylation	740	0.300064	2.0331	0.00101215	0.011147	0.00739296	3553	tags=42%, list=29%, signal=32%	3383/1116/4281/1946/55765/8837/4067/6364/136/1956/2244/10333/1906/355/3570/84451/6376/5621/2266/5912/59341/54757/22943/152007/8767/1852/146433/5329/9966/3600/197259/8685/3976/26191/23566/3091/5578/5743/6662/7525/3592/84830/6278/6288/133522/51704/6347/55816/151195/4057/6386/5629/2651/650/1230/7436/9258/8543/284/8651/3656/6355/26525/3965/8200/5031/4851/4217/302/113/9294/8792/285016/353514/22998/641…
BP	GO:0045087	innate immune response	672	0.457155	3.08506	0.00101215	0.011147	0.00739296	3446	tags=54%, list=28%, signal=41%	3383/6280/3934/4281/6590/445/23650/9076/8942/7097/55765/3929/4067/3459/6279/2633/3455/722/6364/3868/64581/140885/2244/10333/834/3556/1906/57115/715/154064/9111/301/6376/1672/716/2266/58191/7096/57162/79465/5806/118788/79931/3428/965/8767/10537/2634/5359/837/146433/8876/94025/3958/4261/8685/26191/3426/330/342510/1612/3592/80328/710/6278/6288/338382/10346/1520/115004/6347/7128/8808/4064/143662/8032…
BP	GO:0051270	regulation of cellular component movement	705	0.329385	2.22773	0.00101215	0.011147	0.00739296	3553	tags=45%, list=29%, signal=34%	6648/3383/4478/4233/11240/5142/3929/4067/6364/1956/3868/64581/3576/1906/9982/6422/301/3570/6376/1672/58191/5912/4690/22800/1545/59341/152007/1969/1021/23603/7101/3958/1824/3091/5578/5743/6662/8740/5962/3592/84830/3918/6278/2950/306/5796/6347/5613/5293/9542/6386/222487/5629/2651/650/6615/1230/8543/284/23075/6355/57707/1907/6446/65249/3965/6869/9289/5031/4851/6608/3640/51072/5270/22998/3627/56833/3…
BP	GO:0051338	regulation of transferase activity	671	0.232756	1.57049	0.00101215	0.011147	0.00739296	3427	tags=35%, list=28%, signal=27%	25937/1116/1946/55765/4067/136/1956/10333/8440/79616/1906/6422/3570/84451/5621/5912/4690/84959/54757/22943/8767/1852/23603/5997/9966/29982/197259/26191/23566/85450/8900/6288/2950/51704/7128/7453/151195/4057/5629/650/7436/8543/284/8651/10251/3656/60/11329/57561/4217/84152/113/9294/53632/84166/8792/285016/353514/3627/64127/56833/7164/3553/7804/634/3815/2069/5208/238/351/2247/7124/284340/5588/7852/5…
BP	GO:0051707	response to other organism	676	0.420093	2.83694	0.00101215	0.011147	0.00739296	2997	tags=47%, list=24%, signal=37%	1051/3383/6280/3934/6590/445/9076/133/6374/7097/5142/55765/3929/8837/4067/2919/3459/6279/2633/3455/722/6364/64581/140885/2244/10333/834/3576/1906/57115/8564/5266/79679/3570/6376/2023/1672/4690/7096/57162/5806/79931/54757/3428/3620/8767/1969/1021/2634/5359/3595/2921/3600/3853/54541/26191/8934/10577/80380/5578/5743/330/3592/6278/2950/306/10346/824/115004/6347/7128/4064/146857/5336/9516/4057/23406/9…
BP	GO:0007186	G protein-coupled receptor signaling pathway	658	0.267501	1.80166	0.00101317	0.011147	0.00739296	3798	tags=40%, list=31%, signal=30%	133/4233/6374/5142/266977/2919/6364/136/57211/7052/3576/1906/2564/301/23596/6376/1672/58191/2842/1258/30817/23683/5997/8326/2740/5995/2921/2835/8685/23566/1259/5578/9397/51083/6288/50649/23432/51704/6347/5653/5150/165829/976/222487/124976/6372/1230/2920/53831/442197/9568/6355/1907/6869/9289/79627/9628/5031/57561/113/6608/9294/64106/3640/27199/3627/2069/238/351/1608/100/59352/7852/112609/5144/6354…
BP	GO:0043207	response to external biotic stimulus	677	0.419674	2.83367	0.00101317	0.011147	0.00739296	2997	tags=47%, list=24%, signal=37%	1051/3383/6280/3934/6590/445/9076/133/6374/7097/5142/55765/3929/8837/4067/2919/3459/6279/2633/3455/722/6364/64581/140885/2244/10333/834/3576/1906/57115/8564/5266/79679/3570/6376/2023/1672/4690/7096/57162/5806/79931/54757/3428/3620/8767/1969/1021/2634/5359/3595/2921/3600/3853/54541/26191/8934/10577/80380/5578/5743/330/3592/6278/2950/306/10346/824/115004/6347/7128/4064/146857/5336/9516/4057/23406/9…
BP	GO:0051050	positive regulation of transport	675	0.267913	1.80928	0.00101317	0.011147	0.00739296	2651	tags=32%, list=21%, signal=26%	1051/1001/59272/4478/7097/5005/3459/6279/136/1956/6769/5004/64581/140885/2244/834/3556/1906/8564/79679/301/6376/5621/2266/3601/7096/59341/3783/5806/342667/4240/965/8767/9388/1756/7018/3600/3958/26191/23566/8934/3091/5743/5962/51083/6288/1520/6347/5336/6934/6386/1230/8898/57158/201294/284/55612/4321/5873/60/6446/3965/3134/5031/7159/302/5727/6608/9447/8792/7545/353514/3627/64127/3553/7447/5208/3002…
BP	GO:0060548	negative regulation of cell death	661	0.277168	1.86646	0.0010142	0.011147	0.00739296	3110	tags=36%, list=25%, signal=28%	135112/6648/1051/3383/4233/8531/8837/1956/2244/1906/79679/6422/355/301/6376/2023/5621/2266/4690/597/27074/2296/57162/5465/3620/22943/8767/5329/8326/8876/7101/1410/3958/3091/5578/5743/330/50515/6662/1612/8740/3574/85450/25816/2950/6347/7128/51129/5336/6932/6934/4057/6615/3718/284/2019/57707/8463/114769/8200/3134/5457/4851/6608/7088/2627/64127/6197/3553/64919/3815/10413/5272/5641/8838/2247/7124/100…
BP	GO:0000165	MAPK cascade	646	0.327094	2.20081	0.00101523	0.011147	0.00739296	3427	tags=42%, list=28%, signal=32%	3383/1116/4281/4233/55765/8837/4067/2633/6364/136/1956/140885/2244/10333/1906/6422/355/84451/6376/2266/59341/8437/22943/152007/8767/1969/1852/5997/1410/197259/8685/3976/26191/23566/5578/6662/6278/6288/677/2950/6347/55816/9542/23198/6386/2651/650/1230/9258/3718/284/10251/3656/6355/26525/3965/11329/8200/5031/4851/4217/2047/338761/9294/8792/3559/285016/353514/678/64127/7164/3553/5698/634/9462/3815/2…
BP	GO:0051960	regulation of nervous system development	630	0.225976	1.52035	0.00101523	0.011147	0.00739296	4329	tags=44%, list=35%, signal=30%	6280/27242/1946/7097/8837/4067/3556/6422/140578/64764/6376/53335/4690/59341/8437/1075/81618/54149/22943/221074/56963/146433/5997/7101/3976/23566/8934/3091/6662/3475/23432/51704/5653/5629/650/26050/7436/8898/4139/3400/2119/6496/65249/8200/9289/5457/4851/2047/85414/6608/5754/4311/5270/285016/30012/6285/400746/3553/7804/64919/3815/10413/238/351/7124/5080/7852/952/23413/6696/387804/27185/27063/4133/1…
MF	GO:0004888	transmembrane signaling receptor activity	625	0.344528	2.3164	0.00101626	0.011147	0.00739296	3512	tags=45%, list=28%, signal=34%	3383/116379/9180/4233/266977/3459/3455/136/57211/1956/10333/3556/2564/355/3570/23596/2842/3601/7096/2568/59341/30817/4065/3112/1969/8326/2740/5995/3595/7850/2835/8685/23566/5284/51083/23432/5796/51704/4052/8808/165829/976/222487/1230/7436/3872/53831/2051/442197/9568/53833/6869/9289/79627/5031/8809/4851/2047/5727/6608/9294/64106/8792/3559/27199/7804/3815/11025/238/3588/7132/150372/4919/59352/7852/…
CC	GO:0005768	endosome	625	0.224777	1.51127	0.00101626	0.011147	0.00739296	3348	tags=35%, list=27%, signal=27%	1183/153020/5337/55240/25825/1956/23200/301/5912/7037/2348/3601/27074/58528/3112/22943/9388/23603/7018/3600/8934/1730/3592/23432/6764/338382/1520/653145/9516/85377/286410/3718/8898/79156/201294/3108/3656/5873/10133/3134/5371/10479/57561/2047/302/4311/124460/219285/55647/351/5641/3133/7124/7852/5551/10279/10457/7412/3106/25777/255231/1184/972/10397/5063/158376/3561/1318/50617/274/10981/23643/567/4…
BP	GO:0023014	signal transduction by protein phosphorylation	652	0.323424	2.17546	0.00101626	0.011147	0.00739296	3946	tags=47%, list=32%, signal=34%	3383/1116/4281/4233/55765/8837/4067/2633/6364/136/1956/140885/2244/10333/1906/6422/355/84451/6376/2266/59341/8437/22943/152007/8767/1969/1852/5997/1410/197259/8685/3976/26191/23566/5578/6662/6278/6288/677/2950/6347/55816/9542/23198/6386/2651/650/1230/9258/3718/284/10251/3656/6355/26525/3965/11329/8200/5031/4851/4217/2047/338761/9294/8792/3559/285016/353514/678/64127/7164/3553/5698/634/9462/3815/2…
BP	GO:0043069	negative regulation of programmed cell death	601	0.275282	1.84562	0.00101626	0.011147	0.00739296	3110	tags=36%, list=25%, signal=28%	6648/1051/3383/4233/8531/8837/1956/2244/1906/79679/6422/355/301/6376/2023/5621/2266/597/27074/2296/57162/3620/22943/8767/5329/8326/8876/7101/1410/3958/3091/5578/5743/330/50515/6662/1612/8740/3574/85450/25816/2950/6347/7128/51129/5336/6932/6934/4057/6615/3718/284/2019/114769/8200/5457/4851/6608/7088/2627/64127/6197/3553/64919/3815/10413/5272/5641/7124/100/5588/637/952/10625/26291/3575/2243/5562/97…
BP	GO:0050778	positive regulation of immune response	601	0.44925	3.01199	0.00101626	0.011147	0.00739296	3530	tags=56%, list=28%, signal=42%	6280/27242/7097/5142/55765/3929/4067/6279/2633/722/136/64581/2244/10333/57115/715/154064/79679/301/4651/3570/5621/716/2266/7037/4690/966/7096/57162/79465/3783/118788/79931/3428/3620/8767/5359/94025/3600/3958/8685/26191/8934/9473/3426/330/7525/3592/80328/9404/710/338382/1520/115004/51704/7128/143662/80329/5293/5336/23198/4057/9258/3656/4321/115362/353091/60/5817/3965/10673/10096/3134/8809/10010/51…
BP	GO:0051093	negative regulation of developmental process	645	0.264488	1.77918	0.00101626	0.011147	0.00739296	4104	tags=44%, list=33%, signal=31%	1001/25937/27242/1946/7097/8531/8837/4067/2633/1956/57115/6422/10135/301/6376/864/53335/2296/59341/5465/1075/84959/81618/22943/1969/1021/56963/2001/23603/5997/7101/8934/3091/6662/51083/677/3475/23432/55553/4057/4781/650/6615/1230/3718/8898/3400/55612/8651/6496/4241/8200/9289/5371/4851/2047/302/5727/6608/338761/30012/678/3627/6285/5552/3553/634/154796/2069/11025/10413/351/5641/55796/7124/5080/952/…
BP	GO:0060284	regulation of cell development	653	0.240947	1.62079	0.00101626	0.011147	0.00739296	4329	tags=45%, list=35%, signal=31%	6280/27242/1946/7097/8837/4067/2633/64581/2244/1906/6422/140578/64764/6376/2266/53335/4690/59341/8437/5465/6281/81618/54149/22943/221074/56963/146433/23603/5997/7101/3976/23566/8934/3091/6662/51083/3475/10562/51704/5653/4057/5629/650/7436/201294/4139/3400/2119/6496/4241/65249/3987/8200/9289/5457/4851/85414/6608/9294/5754/4311/5270/285016/30012/56833/3553/7804/64919/3815/10413/238/351/7132/7124/50…
BP	GO:0001816	cytokine production	591	0.444709	2.97738	0.00101729	0.011147	0.00739296	3122	tags=51%, list=25%, signal=40%	1051/1001/1116/6280/27242/59272/7097/5142/55765/3929/5005/4067/3459/6279/2633/136/5004/10644/64581/140885/10333/834/3556/57115/79679/9111/301/3570/6376/5621/1545/9508/7096/59341/57162/23220/3428/3620/965/8767/1969/3595/7850/3600/3696/26191/3091/80380/5743/330/3574/3592/6288/2950/338382/824/115004/51704/7128/4052/8808/5293/5336/9516/4057/6372/3718/284/55612/8651/4321/115362/353091/10855/26525/1147…
BP	GO:0002443	leukocyte mediated immunity	595	0.43587	2.91799	0.00101729	0.011147	0.00739296	3881	tags=59%, list=31%, signal=43%	3383/1116/6280/3934/6590/11240/7097/5337/5005/4067/2919/6279/722/136/5004/140885/715/154064/23200/716/5912/7037/966/30817/79465/5806/1075/965/6518/5329/8876/3958/6282/10577/3426/5284/11010/3592/80328/710/6278/2950/306/10562/1520/1476/5236/80329/5293/976/4057/6386/222487/23406/154664/6372/3718/53831/201294/23075/353091/5873/10855/5817/3965/53833/200558/3134/8809/302/51279/4311/64127/6318/4257/3553…
BP	GO:0006887	exocytosis	650	0.323397	2.17475	0.00101729	0.011147	0.00739296	4011	tags=50%, list=32%, signal=36%	1116/6280/3934/6590/11240/7097/5337/5005/4067/2919/6279/55503/136/5004/140885/2244/23200/301/2266/5912/966/30817/5806/1075/965/90019/6518/5329/8876/7018/3958/6282/10577/5284/11010/710/6278/2950/306/10562/1520/1476/5236/8492/5293/135228/976/10257/4057/6386/222487/23406/154664/1230/53831/201294/6355/5873/10855/3965/3134/9783/7277/4851/302/4311/57553/7127/4257/5552/634/3815/11025/7447/10184/87/1265/…
BP	GO:0014070	response to organic cyclic compound	633	0.226602	1.52325	0.00101729	0.011147	0.00739296	4334	tags=42%, list=35%, signal=29%	1051/3383/445/9076/8942/133/4478/11240/1946/7097/114907/6715/5142/8837/4067/1956/1906/6422/10135/301/2348/1545/57162/5465/123/8767/768/3600/7101/1410/54541/688/3371/5743/5251/366/84830/677/2950/133522/306/115004/6347/9420/10257/650/8061/8581/60/5031/5457/4851/57476/84152/5727/6608/79041/678/6566/3627/6285/64127/9308/85315/3553/7804/6502/10413/351/7124/100/1515/7852/952/6696/64135/27063/5144/3359/…
CC	GO:0030141	secretory granule	591	0.322673	2.16034	0.00101729	0.011147	0.00739296	4095	tags=50%, list=33%, signal=35%	1116/6280/3934/6590/11240/7097/5337/25825/5005/2919/6279/1525/5004/140885/2244/1906/23200/2266/5912/966/27074/5806/1075/965/90019/6518/5329/8876/7018/3958/6282/10577/5284/11010/51083/710/6278/2950/306/10562/1520/5653/1476/5236/135228/976/10257/4057/6386/222487/23406/154664/53831/201294/5873/10855/4851/302/4311/5270/4688/4257/5552/3553/5655/634/3815/11025/10184/87/1265/351/26002/671/150372/1515/51…
BP	GO:0031347	regulation of defense response	594	0.437582	2.92854	0.00101729	0.011147	0.00739296	3530	tags=53%, list=28%, signal=40%	1051/6280/116379/9180/59272/7097/55765/3929/4067/3459/6279/3455/722/136/1956/64581/140885/2244/10333/7052/57115/715/154064/9111/301/6376/716/2266/966/7096/59341/57162/79465/5465/1075/118788/79931/3428/3620/8767/5359/7850/94025/3600/8685/26191/3426/5743/330/3592/80328/710/6288/2950/338382/1520/115004/51704/7128/8808/143662/80329/5336/23198/4057/6372/9258/8651/3656/4321/115362/353091/5817/3965/5383…
BP	GO:0098657	import into cell	611	0.298929	2.00543	0.00101729	0.011147	0.00739296	4001	tags=46%, list=32%, signal=33%	133/4233/7097/3929/4067/8645/722/55503/64581/140885/7052/3576/301/4651/5621/58191/7037/4690/2348/3601/84171/5806/4065/2824/4240/22943/221074/90019/6518/23603/5997/7018/3600/3958/7087/4643/8685/3426/6530/7525/6288/306/338382/6347/8492/5336/84000/6386/85377/7436/8898/201294/284/5873/60/64129/157869/7113/10096/10479/5031/302/4688/6557/3553/7804/634/6511/55647/351/7124/51411/84561/3759/11314/3772/529…
BP	GO:2000145	regulation of cell motility	651	0.331383	2.22823	0.00101729	0.011147	0.00739296	3553	tags=45%, list=29%, signal=34%	6648/3383/4478/4233/11240/3929/4067/6364/1956/3868/64581/3576/1906/9982/6422/301/3570/6376/1672/58191/5912/4690/22800/1545/59341/152007/1969/1021/23603/7101/3958/3091/5578/5743/6662/8740/5962/3592/84830/3918/6278/2950/306/5796/6347/5613/5293/9542/6386/222487/5629/2651/650/6615/1230/8543/284/23075/6355/57707/1907/6446/3965/6869/9289/5031/4851/6608/3640/51072/5270/22998/3627/56833/3553/634/154796/3…
BP	GO:0030001	metal ion transport	606	0.249892	1.67455	0.00101833	0.011147	0.00739296	3483	tags=38%, list=28%, signal=29%	1356/3383/51312/10568/10686/196996/55240/5142/4067/8645/55503/6769/64078/3787/6376/6523/5621/7037/59341/3783/84959/342667/1756/221074/23007/7018/3958/23566/5743/79054/3755/51083/57348/6347/5336/79815/1230/245973/57158/30001/6355/4241/53827/6446/341208/9132/5371/10479/5031/302/348938/5270/79041/83959/353514/3627/6557/2247/84561/7852/3759/23413/10991/817/5144/117531/255231/6352/3772/6331/10288/1318…
BP	GO:0030334	regulation of cell migration	607	0.337473	2.26204	0.00101833	0.011147	0.00739296	3553	tags=45%, list=29%, signal=34%	6648/3383/4478/4233/11240/3929/4067/6364/1956/3868/64581/3576/1906/9982/6422/301/3570/6376/58191/5912/4690/22800/1545/59341/152007/1969/23603/7101/3958/3091/5578/5743/6662/8740/5962/3592/84830/3918/6278/2950/306/5796/6347/5613/5293/6386/222487/5629/2651/650/6615/1230/8543/284/23075/6355/57707/1907/6446/3965/9289/5031/4851/6608/3640/5270/22998/3627/56833/3553/634/154796/3815/351/5641/2247/390/7124…
BP	GO:0032101	regulation of response to external stimulus	599	0.37485	2.50915	0.00101833	0.011147	0.00739296	3549	tags=48%, list=29%, signal=36%	1051/6280/116379/9180/59272/4233/11240/7097/3929/4067/6279/722/136/1956/64581/140885/2244/10333/7052/3576/1906/715/301/3570/6376/716/2266/966/1258/59341/5465/1075/118788/84959/3620/8767/56963/5329/7850/2173/3600/1259/5578/3426/5743/330/9397/8740/3592/84830/710/6278/6288/2950/115004/51704/6347/7128/8808/4064/135228/4057/6372/1230/9258/23075/4321/115362/10855/1907/65249/114769/3965/53833/10133/4851…
BP	GO:0008284	positive regulation of cell proliferation	619	0.365454	2.45382	0.00101937	0.011147	0.00739296	4044	tags=53%, list=33%, signal=37%	1001/25937/6489/9180/133/6374/8837/4067/1956/64581/8440/7052/1906/9982/79679/6422/10135/301/3570/6376/7037/4690/57162/342897/8767/1021/146433/8326/3595/3600/7101/3853/3976/3091/80380/5578/688/3371/5743/6662/3574/3592/3918/56648/7128/9420/10257/6934/4057/6386/5629/2651/650/3718/399694/3400/8061/2119/4321/10855/1907/3965/9289/10673/5371/5031/4851/4217/302/6608/9294/2627/8792/3559/3627/6285/64127/94…
BP	GO:0043549	regulation of kinase activity	608	0.250544	1.67884	0.00101937	0.011147	0.00739296	3427	tags=37%, list=28%, signal=28%	25937/1116/1946/55765/4067/136/1956/10333/8440/79616/1906/6422/3570/84451/5621/5912/4690/84959/54757/22943/8767/1852/23603/5997/9966/29982/197259/26191/23566/85450/8900/6288/2950/51704/7128/7453/151195/4057/5629/650/7436/8543/284/8651/10251/3656/60/11329/4217/84152/113/9294/53632/84166/8792/285016/353514/3627/64127/56833/7164/3553/7804/634/3815/2069/5208/238/351/2247/7124/284340/7852/5771/11314/5…
BP	GO:0044403	symbiont process	581	0.235422	1.57465	0.00102041	0.011147	0.00739296	3888	tags=38%, list=31%, signal=27%	3383/6590/9076/59272/4478/4233/8837/4067/1956/1525/9712/3576/154064/7037/27074/3855/79465/5806/3428/1969/5359/3853/8934/3426/9397/80328/10346/115004/6347/80329/4057/5629/6372/6355/353091/5817/3965/7113/2982/5371/4851/4217/302/6891/10010/91703/941/6890/7913/6502/5698/5272/4340/7132/7124/7852/7791/10625/64135/972/6352/3694/27350/5295/858/3561/5156/3695/274/567/8828/10663/114771/6351/9641/50848/1803…
BP	GO:0044419	interspecies interaction between organisms	614	0.244262	1.63853	0.00102041	0.011147	0.00739296	3888	tags=39%, list=31%, signal=28%	3383/6280/6590/9076/59272/4478/4233/8837/4067/1956/1525/64581/9712/3576/57115/154064/7037/27074/3855/79465/5806/3428/1969/5359/3853/8934/3426/9397/80328/10346/115004/6347/80329/4057/5629/6372/6355/353091/5817/3965/7113/2982/5371/4851/4217/302/6891/10010/91703/941/6890/7913/6502/5698/5272/4340/7132/7124/7852/7791/5551/10625/64135/972/6352/3694/27350/5295/858/3561/5156/3695/274/567/8828/10663/11477…
BP	GO:0098609	cell-cell adhesion	617	0.398079	2.67135	0.00102041	0.011147	0.00739296	3274	tags=47%, list=26%, signal=37%	1051/10205/1001/3383/6280/27242/445/23650/9076/4478/10686/1946/4067/6279/1956/1525/140885/2244/8440/3556/79679/301/4651/3570/6376/5621/2266/5912/7037/864/4690/1545/54798/59341/57162/5465/2195/84959/3620/965/8767/8876/3600/3958/7087/6282/26191/1824/80380/5578/6662/7525/64065/8740/3574/5962/3592/84830/677/306/57348/6347/1825/8808/5271/2267/2651/650/1830/3718/11135/3801/23075/8651/60/5817/53827/3965…
BP	GO:0006954	inflammatory response	560	0.459645	3.06909	0.00102145	0.011147	0.00739296	3530	tags=56%, list=28%, signal=42%	1051/3383/1116/6280/445/116379/9180/59272/133/6374/7097/25825/3929/5005/4067/2919/3459/6279/722/6364/136/1956/3868/5004/64581/140885/10333/3556/7052/3576/715/9111/10135/301/3570/6376/716/966/7096/59341/30817/5465/5806/1075/118788/79931/4065/3428/3620/8767/1969/5359/837/146433/8876/7850/2921/3600/4261/3091/9473/3426/5743/330/51083/710/6288/2950/9435/51704/6347/7128/8808/4064/5293/976/6289/6372/650…
CC	GO:0009986	cell surface	618	0.42192	2.83092	0.00102145	0.011147	0.00739296	3015	tags=49%, list=24%, signal=39%	1001/8842/3383/114908/9180/59272/4478/4233/1946/7097/3929/4316/1956/64581/140885/2244/154064/9982/79679/6422/355/301/3570/6376/2023/5621/2266/7037/2348/3601/966/59341/79465/115019/4240/965/9388/9019/1969/1756/5329/8326/3595/7018/3600/1410/3958/3696/80380/79054/6530/3592/84830/80328/2526/3604/5796/824/51704/80329/11197/135228/4057/650/1230/7475/3108/353091/8581/5817/4241/3134/10232/4851/4217/302/4…
BP	GO:0019221	cytokine-mediated signaling pathway	585	0.421928	2.82192	0.00102145	0.011147	0.00739296	3517	tags=51%, list=28%, signal=39%	6648/3383/3934/4281/116379/9180/4478/11240/6374/3929/2919/3459/2633/3455/6364/834/3556/3576/1906/9111/301/3570/6376/3601/2296/57162/8767/2634/837/146433/3595/9966/7850/2921/3600/4261/3976/3091/5743/330/8740/3574/3592/6288/2950/3604/10346/6347/7128/8808/5293/23198/6372/1230/2939/2920/3718/284/8651/3656/4321/6355/26525/1907/10068/114769/3987/53833/10673/3134/5371/8809/302/9235/84166/9447/8792/3559/…
BP	GO:0035239	tube morphogenesis	575	0.298698	1.99741	0.00102145	0.011147	0.00739296	3975	tags=45%, list=32%, signal=32%	1116/157506/133/4233/1956/7052/3576/1906/9982/6422/301/6376/25902/2348/1545/2296/4240/1969/7101/3696/4643/9444/56913/3091/5578/688/3371/5743/6662/84830/3198/6278/677/306/6347/7128/6768/5613/51129/7453/6932/9047/5629/1286/4781/650/7475/8543/284/2119/10855/8463/9289/5371/4851/2047/302/5727/6608/5754/2627/6303/3627/7127/3553/634/154796/2069/57057/10413/694/2247/7124/284340/7852/25932/10457/7045/5850…
BP	GO:0043066	negative regulation of apoptotic process	587	0.272696	1.82423	0.00102145	0.011147	0.00739296	3110	tags=36%, list=25%, signal=28%	6648/1051/3383/8531/8837/1956/2244/1906/79679/6422/355/301/6376/2023/5621/2266/597/27074/2296/3620/22943/8767/5329/8326/8876/7101/1410/3958/3091/5578/5743/330/50515/6662/1612/8740/3574/85450/25816/2950/6347/7128/51129/6932/6934/4057/6615/3718/284/2019/114769/8200/5457/4851/6608/7088/2627/64127/6197/3553/64919/10413/5272/5641/7124/100/5588/637/952/10625/26291/3575/2243/5562/972/6352/5292/4170/5295…
BP	GO:0045055	regulated exocytosis	577	0.353565	2.36417	0.00102145	0.011147	0.00739296	4011	tags=53%, list=32%, signal=37%	1116/6280/3934/6590/11240/7097/5337/5005/4067/2919/6279/55503/136/5004/140885/2244/23200/2266/5912/966/30817/5806/1075/965/90019/6518/5329/8876/7018/3958/6282/10577/5284/11010/710/6278/2950/306/10562/1520/1476/5236/5293/135228/976/10257/4057/6386/222487/23406/154664/53831/201294/5873/10855/3965/3134/9783/7277/4851/302/4311/4257/5552/634/3815/11025/10184/87/1265/351/671/150372/51411/5317/5646/321/…
BP	GO:0055082	cellular chemical homeostasis	564	0.261101	1.74417	0.00102145	0.011147	0.00739296	3145	tags=36%, list=25%, signal=28%	1356/3383/6280/3934/10568/133/10686/1946/4067/6279/57217/55503/7052/1906/6376/5621/7037/1258/59341/84959/1756/221074/8326/23007/2740/7018/2835/23566/3091/79054/6288/51458/5336/4057/1230/10804/245973/57158/30001/23075/6355/1907/6869/5371/10479/5031/302/79041/83959/3627/56833/344905/55647/7447/351/2247/4501/7852/3759/952/23413/26291/817/27185/5144/6354/255231/5562/6352/5295/5156/1318/50617/10663/11…
CC	GO:0012506	vesicle membrane	573	0.294726	1.96971	0.00102249	0.011147	0.00739296	3691	tags=44%, list=30%, signal=32%	7097/5337/55784/2633/121227/1956/140885/10333/8440/23200/301/5912/7037/4690/2348/3601/966/7096/27074/965/90019/6518/5329/8876/26286/7018/3958/8685/5284/11010/306/23432/338382/51704/135228/976/10257/222487/154664/7475/53831/362/3801/5873/23120/3134/6891/5727/6608/4311/4257/6890/634/2069/55647/11025/10184/26002/3133/150372/5317/25932/3460/952/57584/10457/817/9749/3575/11314/10857/3106/972/81029/858…
BP	GO:0051046	regulation of secretion	565	0.275125	1.83725	0.00102249	0.011147	0.00739296	2876	tags=34%, list=23%, signal=27%	27242/1946/7097/55784/5005/4067/3459/6279/2633/55503/136/1956/5004/2244/10333/834/3556/1906/8564/79679/6422/301/6376/2266/7096/59341/30817/3783/965/8767/90019/2740/7850/3976/26191/3091/5578/84830/51083/6288/7128/6934/6386/201294/284/55612/8651/4321/5873/26525/6446/114769/3965/3134/9783/5371/4851/9447/8792/353514/6566/64127/5552/3553/634/7447/5208/7132/3133/7124/100/26253/952/321/23413/6696/64135/…
BP	GO:0055080	cation homeostasis	509	0.295372	1.96421	0.00102249	0.011147	0.00739296	2977	tags=37%, list=24%, signal=30%	1356/6280/3934/51312/133/10686/55240/4067/6279/57217/55503/1956/7052/1906/6376/5621/7037/1258/59341/84959/54757/1756/221074/8326/23007/2740/7018/2835/23566/3091/79054/6288/51458/5336/4057/1230/245973/57158/30001/23075/6355/1907/4241/6869/341208/5371/10479/5031/302/79041/83959/3627/56833/6557/344905/55647/351/2247/4501/84561/7852/3759/952/23413/817/27185/5144/6354/255231/6352/5156/1318/50617/2034/…
BP	GO:0090087	regulation of peptide transport	509	0.248627	1.65335	0.00102249	0.011147	0.00739296	2690	tags=30%, list=22%, signal=25%	27242/1946/7097/5005/4067/3459/6279/2633/1956/5004/2244/10333/834/3556/79679/6422/301/5784/6376/5621/2266/7096/59341/3783/965/8767/2740/7850/26191/8934/3091/5578/5743/84830/6288/7128/6934/284/55612/8651/4321/26525/114769/3965/5371/6608/9447/7545/353514/6566/64127/5552/3553/79628/7447/5208/55432/3133/7124/26253/952/64135/27063/2243/9466/5562/972/6352/1128/5295/3689/440068/5066/29126/2268/7474/1803…
BP	GO:1903530	regulation of secretion by cell	530	0.277586	1.84696	0.00102249	0.011147	0.00739296	2876	tags=34%, list=23%, signal=27%	27242/1946/7097/55784/5005/4067/3459/2633/55503/136/1956/5004/2244/10333/834/3556/1906/8564/79679/6422/301/6376/2266/7096/59341/30817/3783/965/8767/90019/2740/7850/3976/26191/3091/5578/84830/51083/6288/7128/6934/6386/201294/284/55612/8651/4321/5873/26525/114769/3965/3134/9783/5371/4851/9447/353514/6566/64127/5552/3553/634/7447/5208/7132/3133/7124/26253/952/321/23413/6696/64135/27063/11314/2243/94…
BP	GO:0001817	regulation of cytokine production	535	0.444616	2.9576	0.00102354	0.011147	0.00739296	3497	tags=55%, list=28%, signal=41%	1051/1001/27242/59272/7097/5142/55765/3929/5005/4067/3459/2633/136/5004/10644/64581/140885/10333/834/3556/57115/79679/9111/301/3570/6376/5621/1545/7096/59341/57162/23220/3428/3620/965/8767/1969/3595/7850/3600/3696/26191/3091/80380/5743/330/3574/3592/6288/2950/338382/824/115004/51704/7128/4052/8808/5336/9516/4057/6372/3718/284/55612/8651/4321/115362/353091/10855/26525/114769/3965/53833/3134/5371/8…
BP	GO:0002366	leukocyte activation involved in immune response	537	0.412895	2.74659	0.00102354	0.011147	0.00739296	4011	tags=58%, list=32%, signal=41%	3383/1116/6280/3934/6590/11240/7097/5337/3929/5005/4067/2919/6279/136/5004/140885/57115/23200/301/5912/7037/966/30817/5806/1075/965/8767/6518/5329/8876/3958/6282/10577/5284/11010/6278/2950/306/10562/1520/1476/5236/4064/5293/5336/976/4057/6386/222487/23406/154664/3718/53831/201294/23075/5873/10855/3965/200558/3134/8809/302/4311/941/4257/634/3815/11025/1265/671/150372/100/51411/5317/26253/5646/1131…
BP	GO:0006935	chemotaxis	481	0.376172	2.48918	0.00102354	0.011147	0.00739296	2905	tags=43%, list=23%, signal=35%	6280/4233/11240/1946/6374/5337/5142/3929/4067/2919/6279/6364/1525/3576/1906/301/3570/6376/1672/58191/59341/30817/1969/5329/2921/3958/5578/8740/3592/6278/6288/2950/6347/55816/9420/5293/6289/6372/4781/1230/2920/7436/2051/284/8061/23075/6355/26525/1907/65249/3965/4851/2047/5727/6608/2131/8792/91653/3627/6291/56833/3553/64919/154796/3815/351/5641/2247/284340/59352/5197/51411/5080/7941/5588/7852/10457…
BP	GO:0030029	actin filament-based process	528	0.285793	1.90037	0.00102354	0.011147	0.00739296	3193	tags=38%, list=26%, signal=29%	3383/4233/1946/5142/8837/2919/1525/8440/1906/6422/23092/301/6376/114793/4690/59341/22808/6281/2195/3985/2824/1756/23603/4643/1824/1730/5962/221061/1466/133522/58527/5358/6386/23406/5629/11135/23075/60/10096/9294/5754/57553/22998/154796/3815/87/1265/390/7124/7791/3759/817/27063/5144/25777/5295/5063/6331/10602/5156/6624/274/5066/5341/50848/144347/1266/10095/1794/23630/5318/30011/23189/7431/10092/57…
BP	GO:0030155	regulation of cell adhesion	515	0.432929	2.87745	0.00102354	0.011147	0.00739296	3027	tags=49%, list=24%, signal=39%	1051/3383/27242/445/1946/4067/2633/140885/2244/8440/7052/3576/79679/6422/301/4651/3570/6376/5621/2266/7037/864/4690/1545/59341/57162/5465/6281/84959/3620/2824/8767/1969/1021/23603/8876/3600/3958/6251/26191/80380/5578/3371/84034/6662/7525/8740/3574/5962/3592/84830/9404/6288/10562/6347/8808/5613/2267/2651/650/3718/25975/201294/284/23075/55612/8651/4321/4241/53827/3965/3987/53833/9289/10673/5371/485…
BP	GO:0046649	lymphocyte activation	523	0.464231	3.08601	0.00102354	0.011147	0.00739296	3017	tags=53%, list=24%, signal=42%	1051/3383/27242/4478/4067/1525/64581/140885/8440/57115/154064/79679/6422/301/3570/5621/7037/864/4690/57162/79465/3620/8767/1021/8326/8876/3600/3958/26191/8934/80380/7525/8740/3574/3592/80328/51083/677/115004/6347/7128/8808/4064/80329/5293/2267/5336/6932/222487/286410/3718/201294/23075/8651/353091/5873/8581/3965/53833/200558/10673/3134/8809/2047/3559/678/64127/941/9308/56833/3553/64919/634/3815/31…
BP	GO:0050801	ion homeostasis	559	0.275681	1.83952	0.00102354	0.011147	0.00739296	2977	tags=36%, list=24%, signal=28%	1356/6280/3934/51312/10568/133/10686/55240/4067/6279/57217/55503/1956/7052/1906/6376/5621/7037/1258/59341/84959/54757/9388/1756/221074/8326/23007/2740/7018/2835/23566/3091/79054/6288/51458/5336/4057/1230/245973/57158/30001/23075/6355/1907/4241/6869/341208/5371/10479/5031/302/79041/83959/3627/56833/6557/344905/55647/351/2247/4501/84561/7852/3759/952/23413/817/27185/5144/6354/255231/5562/6352/6331/…
BP	GO:0002263	cell activation involved in immune response	539	0.412992	2.74825	0.00102459	0.011147	0.00739296	4011	tags=58%, list=32%, signal=41%	3383/1116/6280/3934/6590/11240/7097/5337/3929/5005/4067/2919/6279/136/5004/140885/57115/23200/301/5912/7037/966/30817/5806/1075/965/8767/6518/5329/8876/3958/6282/10577/5284/11010/6278/2950/306/10562/1520/1476/5236/4064/5293/5336/976/4057/6386/222487/23406/154664/3718/53831/201294/23075/5873/10855/3965/200558/3134/8809/302/4311/941/4257/634/3815/11025/1265/351/671/150372/100/51411/5317/26253/5646/…
BP	GO:0002274	myeloid leukocyte activation	505	0.418748	2.78265	0.00102459	0.011147	0.00739296	3881	tags=57%, list=31%, signal=41%	1116/6280/3934/6590/11240/7097/5337/3929/5005/4067/2919/3459/6279/136/5004/140885/10333/3576/23200/10135/6376/5912/966/7096/30817/5806/1075/965/10537/5359/6518/5329/8876/3600/3958/6282/10577/5284/11010/6278/2950/306/10562/1520/1476/5236/5293/976/4057/6386/222487/23406/154664/6372/9258/53831/201294/5873/10855/1907/3965/302/4311/4257/634/3815/11025/1265/351/671/7124/150372/116071/51411/5317/5646/11…
BP	GO:0030855	epithelial cell differentiation	491	0.308171	2.0394	0.00102459	0.011147	0.00739296	2581	tags=33%, list=21%, signal=28%	1051/1001/8842/25937/3383/25984/9076/4478/4233/3868/5266/301/26298/2296/3855/2195/1969/1021/23581/8796/3854/2001/56975/3887/3853/3958/4643/56913/3976/1824/9333/3091/688/6662/64065/5962/6278/677/56033/1825/6768/51458/5613/643414/135228/5629/1286/4781/650/1830/2939/3872/286887/3866/6496/125115/3852/159989/29841/4851/302/54507/5727/6608/9294/5754/2627/3857/3553/64919/9119/634/2069/10413/694/5493/713…
BP	GO:0045596	negative regulation of cell differentiation	488	0.271652	1.79796	0.00102459	0.011147	0.00739296	4221	tags=46%, list=34%, signal=32%	25937/1946/8837/4067/2633/1956/57115/6422/301/6376/864/53335/59341/5465/84959/81618/22943/1021/56963/2001/23603/5997/7101/8934/6662/51083/677/3475/55553/4057/650/6615/3718/3400/8651/6496/4241/8200/9289/4851/2047/5727/6608/338761/30012/678/3627/6285/3553/634/2069/11025/10413/351/55796/7124/5080/952/6696/5771/144165/972/4133/58516/5295/3659/567/114771/3606/114990/7474/144347/5318/3566/8324/25928/70…
BP	GO:0051223	regulation of protein transport	493	0.245214	1.62469	0.00102459	0.011147	0.00739296	2690	tags=30%, list=22%, signal=25%	27242/1946/7097/5005/4067/3459/2633/1956/5004/2244/10333/834/3556/79679/6422/301/5784/6376/5621/2266/7096/59341/3783/965/8767/2740/7850/26191/8934/3091/5578/5743/84830/6288/7128/6934/284/55612/8651/4321/26525/114769/3965/5371/6608/9447/7545/353514/6566/64127/5552/3553/79628/7447/5208/55432/3133/7124/26253/952/64135/27063/2243/9466/5562/6352/1128/5295/3689/440068/5066/29126/2268/7474/1803/23601/13…
BP	GO:0080135	regulation of cellular response to stress	491	0.254283	1.68278	0.00102459	0.011147	0.00739296	4059	tags=43%, list=33%, signal=30%	135112/6648/4281/4233/55765/8531/4067/1956/140885/10333/8440/1906/6422/10135/355/84451/2023/4690/59341/22943/8767/1021/56963/8876/1410/197259/26191/3091/5743/2950/115004/6386/650/6615/9258/57707/26525/5371/4217/2047/8792/64127/7164/10783/7913/3553/55432/351/7124/10516/637/6696/5771/817/27063/972/4170/5295/10000/567/56940/8877/64170/7474/9532/10913/4317/8324/7042/57103/11202/6317/29969/604/653361/…
BP	GO:0006897	endocytosis	520	0.298893	1.98548	0.00102564	0.011147	0.00739296	4001	tags=46%, list=32%, signal=33%	133/4233/7097/3929/4067/722/64581/140885/7052/3576/301/4651/58191/7037/4690/2348/3601/84171/5806/4065/4240/22943/90019/23603/7018/3600/3958/7087/4643/8685/3426/7525/6288/306/338382/6347/8492/5336/84000/6386/85377/7436/8898/201294/284/5873/60/64129/157869/7113/10096/5031/302/4688/3553/7804/634/55647/351/7124/51411/11314/5295/718/858/3689/3561/717/151647/201176/274/567/8877/11037/92737/9332/2268/74…
BP	GO:0030162	regulation of proteolysis	517	0.269668	1.79123	0.00102564	0.011147	0.00739296	3857	tags=42%, list=31%, signal=30%	5918/6280/6590/154214/8837/4067/6279/722/64581/834/715/5266/355/144568/2023/5621/716/966/27074/1075/3428/8767/837/5329/9966/7850/1410/3426/5743/728113/330/64065/1612/8740/25816/710/27151/1476/653145/5271/135228/23198/4057/6386/5268/4241/114769/3965/112399/26998/5371/4217/302/10010/9447/5270/2734/6318/6197/3553/5698/55432/351/5272/5641/2619/7124/637/27185/144165/718/440068/717/8797/274/64115/5055/…
CC	GO:0030659	cytoplasmic vesicle membrane	558	0.293214	1.95465	0.00102564	0.011147	0.00739296	3691	tags=44%, list=30%, signal=32%	7097/5337/55784/121227/1956/140885/10333/23200/301/5912/7037/2348/3601/966/7096/27074/965/90019/6518/5329/8876/26286/7018/3958/8685/5284/11010/306/23432/338382/51704/135228/976/10257/222487/154664/7475/53831/362/3801/5873/23120/3134/6891/5727/6608/4311/4257/6890/634/2069/55647/11025/10184/26002/3133/150372/5317/25932/3460/952/57584/10457/817/9749/3575/11314/10857/3106/972/81029/858/963/10288/3689…
BP	GO:0042330	taxis	482	0.375657	2.48518	0.00102564	0.011147	0.00739296	2905	tags=43%, list=23%, signal=35%	6280/4233/11240/1946/6374/5337/5142/3929/4067/2919/6279/6364/1525/3576/1906/301/3570/6376/1672/58191/59341/30817/1969/5329/2921/3958/5578/8740/3592/6278/6288/2950/6347/55816/9420/5293/6289/6372/4781/1230/2920/7436/2051/284/8061/23075/6355/26525/1907/65249/3965/4851/2047/5727/6608/2131/8792/91653/3627/6291/56833/3553/64919/154796/3815/351/5641/2247/284340/59352/5197/51411/5080/7941/5588/7852/10457…
BP	GO:0043408	regulation of MAPK cascade	520	0.342752	2.27683	0.00102564	0.011147	0.00739296	3427	tags=44%, list=28%, signal=33%	3383/1116/4281/55765/8837/4067/2633/6364/136/1956/140885/2244/10333/1906/6422/355/84451/6376/2266/59341/22943/152007/8767/1969/1852/5997/197259/8685/3976/26191/23566/5578/6278/6288/2950/6347/55816/6386/2651/650/1230/9258/284/10251/3656/6355/26525/3965/11329/8200/5031/4851/4217/2047/338761/9294/8792/285016/353514/64127/7164/3553/634/3815/238/351/2247/7124/284340/7852/10457/26291/5771/11314/6354/46…
BP	GO:0098771	inorganic ion homeostasis	518	0.292609	1.94399	0.00102564	0.011147	0.00739296	2977	tags=37%, list=24%, signal=29%	1356/6280/3934/51312/10568/133/10686/55240/4067/6279/57217/55503/1956/7052/1906/6376/5621/7037/1258/59341/84959/54757/1756/221074/8326/23007/2740/7018/2835/23566/3091/79054/6288/51458/5336/4057/1230/245973/57158/30001/23075/6355/1907/4241/6869/341208/5371/10479/5031/302/79041/83959/3627/56833/6557/344905/55647/351/2247/4501/84561/7852/3759/952/23413/817/27185/5144/6354/255231/6352/5156/1318/50617…
BP	GO:0045859	regulation of protein kinase activity	554	0.256691	1.709	0.00102669	0.011147	0.00739296	3427	tags=37%, list=28%, signal=28%	25937/1116/1946/55765/4067/136/1956/10333/8440/79616/1906/6422/3570/84451/5621/5912/4690/84959/54757/22943/8767/1852/23603/5997/9966/197259/26191/23566/85450/8900/6288/2950/51704/7128/7453/151195/4057/5629/650/7436/284/8651/10251/3656/60/11329/4217/84152/113/9294/53632/8792/285016/353514/3627/64127/7164/3553/7804/634/3815/2069/238/351/2247/7124/284340/7852/5771/11314/5562/972/6352/5063/8797/11213…
BP	GO:0051345	positive regulation of hydrolase activity	521	0.27029	1.79417	0.00102669	0.011147	0.00739296	4031	tags=45%, list=32%, signal=32%	3383/6280/8837/4067/6279/6364/1956/64581/9712/834/6422/355/23092/6376/8437/6281/3428/8767/1969/5359/837/23603/5997/26286/9966/6251/64065/1612/133522/6347/23216/23198/650/116984/6355/3965/112399/3987/141/9628/5371/5031/117289/4217/10010/1122/9447/259173/10144/9462/3815/351/5641/2247/7124/637/57584/58504/11314/6354/6352/858/80005/8797/5156/201176/81704/6362/257106/64115/5341/64170/6351/7474/25780/5…
CC	GO:0000323	lytic vacuole	500	0.24492	1.62628	0.00102775	0.011147	0.00739296	4396	tags=46%, list=35%, signal=31%	1356/445/23650/11240/5337/5005/4067/23200/301/27074/58528/1075/81618/3112/8876/10577/5284/11010/6278/338382/1520/824/7128/5293/11182/9516/6386/154664/286410/7436/245973/79156/201294/84141/3108/57707/5873/10855/3134/57561/302/259307/4688/4257/5552/3553/3815/5641/671/150372/100/59345/1515/7852/5551/10279/1184/972/718/6382/158376/50617/4948/114990/1803/23250/3122/81567/157753/6317/7805/3109/6948/217…
BP	GO:0001568	blood vessel development	454	0.340897	2.24722	0.00102775	0.011147	0.00739296	4020	tags=49%, list=32%, signal=35%	1116/133/8837/3576/1906/9982/6422/301/3570/6376/2348/1545/2296/4240/1969/7101/3696/4643/9444/56913/3091/5578/688/5743/84830/3198/6278/677/306/6347/7128/4052/5613/51129/7453/6934/9047/5629/1286/284/8061/10855/8463/9289/5371/4851/2047/302/6608/5754/2627/6303/3627/7127/3553/634/154796/2069/57057/10413/694/2247/284340/5080/7852/25932/10457/7045/58504/144165/90268/54583/718/4015/3689/5156/2034/2113/11…
BP	GO:0001944	vasculature development	472	0.339075	2.24031	0.00102775	0.011147	0.00739296	4020	tags=49%, list=32%, signal=34%	6648/1116/133/8837/3576/1906/9982/6422/301/3570/5784/6376/2348/1545/2296/4240/1969/7101/3696/4643/9444/56913/3976/3091/5578/688/5743/84830/3198/6278/677/306/6347/7128/4052/5613/51129/7453/6934/9047/5629/1286/284/8061/10855/8463/9289/5371/4851/2047/302/6608/5754/2627/6303/3627/7127/3553/634/154796/3815/2069/57057/10413/694/2247/284340/5080/7852/25932/10457/7045/58504/144165/90268/54583/718/4015/36…
CC	GO:0005764	lysosome	500	0.24492	1.62628	0.00102775	0.011147	0.00739296	4396	tags=46%, list=35%, signal=31%	1356/445/23650/11240/5337/5005/4067/23200/301/27074/58528/1075/81618/3112/8876/10577/5284/11010/6278/338382/1520/824/7128/5293/11182/9516/6386/154664/286410/7436/245973/79156/201294/84141/3108/57707/5873/10855/3134/57561/302/259307/4688/4257/5552/3553/3815/5641/671/150372/100/59345/1515/7852/5551/10279/1184/972/718/6382/158376/50617/4948/114990/1803/23250/3122/81567/157753/6317/7805/3109/6948/217…
BP	GO:0010942	positive regulation of cell death	478	0.301076	1.98924	0.00102775	0.011147	0.00739296	4051	tags=47%, list=33%, signal=33%	6648/6280/133/4067/6279/64581/10333/834/8440/7052/8564/6422/355/301/5621/4690/1545/1075/81618/3620/9263/22943/8767/10537/837/5329/8326/9966/54541/220/5743/1612/3592/25816/51083/50649/824/9262/6347/29944/5293/91607/650/79156/8061/3965/112399/5371/5457/7159/4851/4217/54507/6285/7164/694/3002/7132/8739/7124/637/5771/817/27063/467/6352/4170/5063/3486/3689/8797/274/3939/64170/29126/7474/1871/4118/1089…
BP	GO:0072358	cardiovascular system development	478	0.338761	2.23823	0.00102775	0.011147	0.00739296	4449	tags=53%, list=36%, signal=36%	6648/1116/133/8837/3576/1906/9982/6422/301/3570/5784/6376/2348/1545/2296/4240/1969/7101/3696/4643/9444/56913/3976/3091/5578/688/5743/84830/3198/6278/677/306/6347/7128/4052/5613/51129/7453/6934/9047/5629/1286/26050/284/8061/10855/8463/64359/9289/5371/4851/2047/302/6608/5754/2627/6303/3627/7127/3553/634/154796/3815/2069/57057/10413/694/2247/284340/5080/7852/25932/10457/7045/58504/144165/90268/54583…
BP	GO:0009617	response to bacterium	453	0.443644	2.92134	0.00103093	0.011147	0.00739296	2984	tags=49%, list=24%, signal=38%	1051/3383/6280/3934/6590/445/9076/133/6374/7097/5142/55765/3929/8837/4067/2919/6279/722/6364/140885/2244/10333/834/3576/1906/57115/8564/3570/6376/1672/7096/57162/79931/54757/3620/8767/1969/2634/3595/2921/3853/26191/8934/80380/5578/5743/3592/6278/2950/306/824/6347/7128/4064/5336/9516/4057/6372/4781/650/2920/10804/3656/115362/26525/114769/3965/10133/4851/84166/8792/3627/64127/941/56833/4257/6197/35…
BP	GO:0008285	negative regulation of cell proliferation	467	0.307812	2.03023	0.00103199	0.011147	0.00739296	4031	tags=47%, list=32%, signal=33%	5918/6648/1051/10950/27242/133/7097/4067/2919/8440/3576/9982/79679/6422/5784/5621/864/1545/57162/3620/1021/2173/3600/7101/6282/3976/80380/5743/26136/6662/83593/3592/51083/2950/3604/5796/6347/7128/7453/135228/5629/4781/650/10804/8061/55214/55612/6355/3965/53833/8200/9289/5371/4851/2047/5727/338761/3559/5270/941/3553/64919/634/2069/694/351/7124/5080/10457/5771/11314/3851/10397/3486/3659/858/10288/4…
BP	GO:0030003	cellular cation homeostasis	460	0.289868	1.91111	0.00103199	0.011147	0.00739296	3145	tags=39%, list=25%, signal=30%	1356/6280/3934/133/10686/4067/6279/57217/55503/7052/1906/6376/5621/7037/1258/59341/84959/1756/221074/8326/23007/2740/7018/2835/23566/3091/79054/6288/5336/4057/1230/245973/57158/30001/23075/6355/1907/6869/5371/10479/5031/302/79041/83959/3627/56833/344905/55647/351/2247/4501/7852/3759/952/23413/817/27185/5144/6354/255231/6352/5156/1318/50617/10663/1139/2359/7474/6263/958/2358/5737/9290/6357/5734/29…
BP	GO:0043269	regulation of ion transport	467	0.249901	1.64827	0.00103199	0.011147	0.00739296	3786	tags=41%, list=30%, signal=30%	1051/3383/59272/196996/5142/4067/8645/6769/3787/1906/8564/2564/6376/5621/84959/342667/2824/1756/90019/5997/7018/3958/23566/5743/3755/1612/51083/306/1520/6347/5336/1230/57158/53827/9132/5371/5031/302/8792/5270/79041/353514/3627/3553/351/7852/25932/3759/10991/817/5144/117531/3359/6352/1128/3772/9071/6331/10288/1318/274/567/6351/5724/23630/2745/5318/4638/2904/259232/6098/54800/5923/6373/1536/1394/23…
BP	GO:0002275	myeloid cell activation involved in immune response	417	0.414115	2.72452	0.00103306	0.011147	0.00739296	3881	tags=57%, list=31%, signal=41%	1116/6280/3934/6590/11240/7097/5337/3929/5005/4067/2919/6279/136/5004/140885/23200/5912/966/30817/5806/1075/965/6518/5329/8876/3958/6282/10577/5284/11010/6278/2950/306/10562/1520/1476/5236/5293/976/4057/6386/222487/23406/154664/53831/201294/5873/10855/3965/302/4311/4257/634/3815/11025/1265/671/150372/51411/5317/5646/11314/10857/718/963/10288/3689/8560/567/2268/4860/23250/23601/126014/5724/3101/17…
BP	GO:0002444	myeloid leukocyte mediated immunity	417	0.416542	2.74048	0.00103306	0.011147	0.00739296	3881	tags=58%, list=31%, signal=41%	1116/6280/3934/6590/11240/7097/5337/5005/4067/2919/6279/136/5004/140885/23200/5912/966/30817/5806/1075/965/6518/5329/8876/3958/6282/10577/5284/11010/6278/2950/306/10562/1520/1476/5236/5293/976/4057/6386/222487/23406/154664/6372/53831/201294/5873/10855/3965/302/4311/4257/634/3815/11025/1265/5272/3133/671/150372/51411/5317/5646/11314/10857/718/963/10288/3689/8560/567/2268/4860/23250/23601/126014/57…
BP	GO:0006873	cellular ion homeostasis	470	0.289188	1.90714	0.00103306	0.011147	0.00739296	3145	tags=39%, list=25%, signal=30%	1356/6280/3934/10568/133/10686/4067/6279/57217/55503/7052/1906/6376/5621/7037/1258/59341/84959/1756/221074/8326/23007/2740/7018/2835/23566/3091/79054/6288/51458/5336/4057/1230/245973/57158/30001/23075/6355/1907/6869/5371/10479/5031/302/79041/83959/3627/56833/344905/55647/351/2247/4501/7852/3759/952/23413/817/27185/5144/6354/255231/6352/5156/1318/50617/10663/1139/2359/7474/6263/958/2358/5737/9290/…
BP	GO:0055065	metal ion homeostasis	452	0.324706	2.13616	0.00103306	0.011147	0.00739296	2977	tags=40%, list=24%, signal=31%	1356/6280/3934/51312/133/10686/55240/4067/6279/57217/55503/1956/7052/1906/6376/5621/7037/1258/59341/84959/54757/1756/221074/8326/23007/2740/7018/2835/23566/3091/79054/6288/5336/4057/1230/57158/30001/23075/6355/1907/4241/6869/341208/5371/5031/302/79041/3627/6557/344905/351/2247/4501/84561/7852/3759/952/23413/817/27185/5144/6354/255231/6352/5156/1318/2034/567/10663/1139/2359/7474/6263/958/2358/5737…
BP	GO:0002790	peptide secretion	438	0.308147	2.02674	0.00103413	0.011147	0.00739296	2876	tags=37%, list=23%, signal=29%	1116/27242/1946/7097/55240/5005/4067/3459/6279/2633/1956/5004/2244/10333/834/3556/1906/79679/6422/301/6376/2266/7096/59341/3783/965/8767/2740/26286/7850/26191/3091/5578/84830/51083/6288/7128/6934/284/55612/8651/4321/115362/26525/114769/3965/10673/5371/4851/9447/353514/6566/64127/5552/3553/7447/5208/3133/7124/5452/26253/952/64135/27063/2243/9466/255231/972/6352/3694/440068/5066/5341/29126/2268/747…
BP	GO:0009611	response to wounding	457	0.290373	1.91275	0.00103413	0.011147	0.00739296	2872	tags=35%, list=23%, signal=28%	1001/133/8837/4067/6279/1956/64581/2244/1906/301/64764/6376/2266/5912/2348/966/5465/84959/9060/56963/5359/5329/8326/3853/3091/5578/688/3371/84830/710/6288/677/3475/7128/5653/653145/5336/135228/1230/4321/5460/5873/10855/60/4851/4217/302/5754/2627/3640/5270/678/634/2069/10413/5493/2247/1608/59352/5197/5080/5588/7852/6696/2243/5295/3659/4015/81029/6382/158376/5156/81704/2113/5055/5341/50506/7474/832…
BP	GO:0061061	muscle structure development	438	0.25768	1.69481	0.00103413	0.011147	0.00739296	4214	tags=44%, list=34%, signal=30%	6648/445/133/8531/8837/1525/1906/140578/2296/22808/5465/22943/1756/5997/1410/9444/3976/688/6662/8740/1466/677/3475/824/55553/6934/5629/650/57158/4154/5457/4851/4217/2047/3344/6608/2627/91653/3627/55544/6285/3815/2069/84159/57057/10413/694/55796/2247/7124/27063/467/144165/5562/5292/3486/4015/858/6382/963/5156/2034/274/7490/115701/92737/3606/7474/150572/5318/3566/8324/25928/4638/7042/8910/5915/6664…
BP	GO:0071396	cellular response to lipid	446	0.337645	2.22234	0.00103413	0.011147	0.00739296	1861	tags=30%, list=15%, signal=26%	1051/3383/3934/445/9076/4478/11240/1946/6374/7097/114907/6715/5142/3929/8837/4067/2919/1956/140885/834/3576/1906/8564/6422/301/6376/5465/79931/8767/2921/3600/7101/54541/26191/80380/5578/3371/6662/7525/5251/3592/84830/677/2950/133522/824/6347/7128/9420/4064/9516/4057/6372/2920/7475/3656/2707/26525/8463/114769/5031/5457/57476/5727/6608/346673/5754/678/3627/64127/941/85315/3553/7804/6502/10413/671/7…
BP	GO:0030036	actin cytoskeleton organization	466	0.288951	1.90418	0.0010352	0.011147	0.00739296	3182	tags=38%, list=26%, signal=29%	3383/4233/1946/8837/2919/1525/8440/1906/6422/23092/301/6376/114793/4690/59341/22808/6281/2195/3985/2824/23603/1730/5962/221061/1466/133522/5358/6386/23406/5629/11135/23075/60/10096/9294/5754/57553/22998/154796/3815/87/1265/390/7124/7791/27063/5295/5063/10602/5156/6624/274/5066/5341/50848/144347/1266/10095/1794/30011/23189/10092/5734/11252/79822/7046/961/9050/604/165904/9124/92521/4604/2316/9475/3…
BP	GO:0043065	positive regulation of apoptotic process	439	0.300425	1.97513	0.0010352	0.011147	0.00739296	3844	tags=46%, list=31%, signal=33%	6648/6280/133/4067/6279/64581/834/8440/7052/6422/355/301/5621/4690/1545/1075/81618/3620/9263/8767/10537/837/5329/8326/9966/220/5743/1612/3592/25816/51083/50649/824/9262/6347/29944/5293/650/79156/8061/3965/112399/5371/5457/7159/4851/4217/54507/6285/7164/694/3002/7132/8739/7124/637/5771/817/27063/467/6352/4170/5063/3486/8797/274/3939/64170/29126/7474/1871/4118/10892/958/7042/57103/26524/5915/3569/3…
BP	GO:0043068	positive regulation of programmed cell death	442	0.297058	1.95369	0.0010352	0.011147	0.00739296	4323	tags=50%, list=35%, signal=34%	6648/6280/133/4067/6279/64581/834/8440/7052/6422/355/301/5621/4690/1545/1075/81618/3620/9263/8767/10537/837/5329/8326/9966/220/5743/1612/3592/25816/51083/50649/824/9262/6347/29944/5293/650/79156/8061/3965/112399/5371/5457/7159/4851/4217/54507/6285/7164/694/3002/7132/8739/7124/637/5771/817/27063/467/6352/4170/5063/3486/8797/274/3939/64170/29126/7474/1871/4118/10892/958/7042/57103/26524/5915/3569/3…
BP	GO:0097435	supramolecular fiber organization	458	0.270159	1.77881	0.0010352	0.011147	0.00739296	3154	tags=36%, list=25%, signal=28%	3383/4281/4233/8837/8440/1906/6422/6376/4690/1545/9508/84171/2296/59341/6281/2195/221074/23603/1410/5352/1730/5962/221061/1466/133522/5358/23406/5629/3872/11135/23075/10096/5351/302/57553/3857/22998/79649/79709/87/351/390/5317/7791/10516/27063/4133/5295/5063/4015/10602/5156/6624/274/567/5341/1139/144347/10095/4921/5318/7042/30011/23189/7431/10092/5734/79822/54800/7046/961/9050/165904/5033/4604/23…
BP	GO:1901699	cellular response to nitrogen compound	439	0.251731	1.65499	0.0010352	0.011147	0.00739296	4134	tags=43%, list=33%, signal=30%	1051/3383/445/6715/5142/8837/4067/1956/10333/1906/6422/10135/5621/53335/4690/2348/58528/8767/837/2740/26191/688/5743/6662/366/677/2950/824/115004/245973/3718/8651/60/23175/5031/4217/113/79041/64127/3553/634/351/5641/7124/5588/26291/5771/64135/7412/5144/5562/1128/5295/858/158376/5156/50617/3269/7490/1139/108/6263/5724/2358/23189/7431/196/2887/9021/64121/84174/1536/1394/9475/2303/55971/10392/255738…
BP	GO:0002253	activation of immune response	459	0.436971	2.87735	0.00103627	0.011147	0.00739296	3530	tags=55%, list=28%, signal=41%	6280/27242/7097/5142/55765/3929/4067/6279/2633/722/64581/2244/10333/57115/715/79679/4651/5621/716/2266/4690/966/7096/57162/3783/118788/79931/3428/8767/5359/94025/3958/8685/26191/8934/9473/3426/330/7525/9404/710/338382/1520/115004/7128/143662/5293/5336/23198/4057/9258/3656/60/10096/10010/51279/9447/64127/6197/3553/5698/634/5641/4340/150372/100/5588/26253/952/5771/64135/10384/5144/11314/80216/2243/…
BP	GO:0002764	immune response-regulating signaling pathway	431	0.438807	2.88264	0.00103627	0.011147	0.00739296	3500	tags=55%, list=28%, signal=41%	6280/27242/7097/5142/55765/3929/4067/6279/2633/64581/2244/10333/57115/79679/4651/5621/2266/4690/7096/57162/3783/118788/79931/8767/5359/94025/3958/8685/26191/8934/9473/330/5284/7525/9404/338382/1520/7128/143662/5293/5336/23198/4057/9258/3656/60/53833/10096/10010/64127/6197/5698/634/3815/5641/4340/150372/100/5588/26253/952/5771/64135/10384/5144/11314/80216/2243/90268/5295/5063/3659/7321/10288/3689/…
BP	GO:0048729	tissue morphogenesis	459	0.261155	1.71964	0.00103627	0.011147	0.00739296	3101	tags=35%, list=25%, signal=27%	157506/133/4478/4233/1956/3868/7052/1906/6422/25902/2348/2296/22943/1969/54101/768/3853/220/3976/3091/3371/6662/9095/6768/9420/5613/23198/5629/5268/650/6615/7475/3872/8543/3400/2119/4321/6496/8463/5371/5457/4851/5727/6608/5754/2300/3627/5698/634/57057/10413/2247/7124/4919/7852/80326/27063/8549/144165/7490/8828/7474/5361/5318/8324/25928/4638/7042/89870/51435/284217/6664/2132/7046/9021/6868/79192/4…
BP	GO:0009306	protein secretion	419	0.305934	2.00966	0.00103734	0.011147	0.00739296	2858	tags=37%, list=23%, signal=29%	1116/27242/1946/7097/55240/5005/4067/3459/2633/1956/5004/2244/10333/834/3556/79679/6422/301/6376/2266/7096/59341/3783/965/8767/2740/26286/7850/26191/3091/5578/84830/51083/6288/7128/6934/284/55612/8651/4321/115362/26525/114769/3965/10673/5371/4851/9447/353514/6566/64127/5552/3553/7447/5208/3133/7124/5452/26253/952/64135/27063/2243/9466/255231/6352/3694/440068/5066/5341/29126/2268/7474/4860/1803/23…
BP	GO:0050865	regulation of cell activation	419	0.470444	3.09032	0.00103734	0.011147	0.00739296	2905	tags=53%, list=23%, signal=42%	1051/27242/3929/4067/136/64581/140885/10333/8440/57115/79679/6422/301/3570/6376/5621/2266/7037/864/4690/30817/57162/1075/84959/3620/8767/5359/8876/3600/3958/26191/80380/5578/7525/8740/3574/3592/51083/677/115004/6347/7128/8808/2267/286410/9258/3718/8543/201294/8651/3965/53833/200558/10673/3134/3559/5270/353514/678/64127/941/9308/56833/3553/634/3133/671/150372/100/5588/9760/952/10457/5771/3575/7412…
BP	GO:0048514	blood vessel morphogenesis	403	0.350992	2.30108	0.0010395	0.011147	0.00739296	4449	tags=54%, list=36%, signal=36%	1116/133/3576/1906/9982/6422/301/6376/2348/1545/2296/4240/1969/7101/3696/4643/9444/56913/3091/5578/688/5743/84830/3198/6278/677/306/6347/7128/5613/51129/7453/9047/5629/1286/284/10855/8463/9289/5371/4851/2047/302/6608/2627/6303/3627/7127/3553/634/154796/2069/57057/10413/694/2247/284340/7852/25932/10457/7045/58504/90268/54583/718/4015/3689/5156/2034/2113/116150/10000/7490/8828/8877/3606/1139/7474/9…
CC	GO:0098552	side of membrane	403	0.390454	2.55979	0.0010395	0.011147	0.00739296	3789	tags=53%, list=30%, signal=38%	3383/114908/9180/83850/196996/1946/4067/6769/2244/154064/79679/301/3570/5621/2266/7037/2348/966/79465/342667/4240/5997/3595/7018/26191/80380/79054/7525/80328/3604/824/80329/9516/1230/353091/3134/4217/8792/3559/5270/3627/941/9308/154796/3815/4340/3133/7124/100/1515/7852/10384/3575/7412/29851/2243/3106/9466/117531/972/3694/858/6382/135250/3689/3561/5156/567/10663/3824/29126/9332/2268/942/3122/958/1…
CC	GO:0098797	plasma membrane protein complex	409	0.256876	1.68486	0.00104058	0.011147	0.00739296	4005	tags=44%, list=32%, signal=31%	1001/9180/7097/5142/8837/4067/1956/3787/10333/355/3570/7037/7096/3783/3112/1756/23603/7018/3696/5578/3755/165829/6386/650/10804/3108/8140/9568/2707/3134/9132/8809/3559/4688/634/28513/6641/3588/3133/3759/7412/5144/1439/3106/3359/972/3694/6331/3689/3695/567/50506/1139/8807/3122/23630/958/3654/132884/8910/3775/3109/2904/3569/7046/653361/1536/1138/329/926/3776/3105/3779/6326/3594/2207/3123/54518/8301…
BP	GO:0033674	positive regulation of kinase activity	412	0.268672	1.76216	0.00104167	0.011147	0.00739296	3553	tags=40%, list=29%, signal=29%	1116/1946/55765/4067/136/1956/10333/1906/3570/84451/5621/54757/22943/8767/1852/9966/197259/23566/6288/51704/151195/4057/5629/650/7436/8543/284/8651/3656/4217/113/9294/8792/285016/353514/64127/7164/3553/7804/3815/2069/5208/238/2247/7124/284340/7852/11314/5562/972/6352/5063/8797/5156/3606/1139/2268/7474/108/4921/1849/10892/958/2358/7042/3654/57103/6556/7046/29969/653361/6868/60675/5788/8795/200958/…
BP	GO:0043299	leukocyte degranulation	410	0.418689	2.74538	0.00104167	0.011147	0.00739296	3881	tags=58%, list=31%, signal=41%	1116/6280/3934/6590/11240/7097/5337/5005/4067/2919/6279/136/5004/140885/23200/5912/966/30817/5806/1075/965/6518/5329/8876/3958/6282/10577/5284/11010/6278/2950/306/10562/1520/1476/5236/5293/976/4057/6386/222487/23406/154664/53831/201294/5873/10855/3965/3134/302/4311/4257/634/3815/11025/1265/671/150372/51411/5317/5646/11314/10857/718/963/10288/3689/8560/567/2268/4860/23250/23601/126014/5724/3101/17…
BP	GO:0071417	cellular response to organonitrogen compound	400	0.255457	1.67314	0.00104167	0.011147	0.00739296	4120	tags=43%, list=33%, signal=30%	1051/3383/445/6715/5142/8837/4067/1956/10333/1906/6422/10135/5621/53335/4690/2348/58528/8767/837/2740/26191/688/5743/6662/366/677/2950/824/245973/3718/8651/60/23175/5031/113/79041/64127/3553/634/351/5641/7124/5588/26291/5771/7412/5144/5562/5295/858/158376/5156/50617/3269/7490/108/6263/5724/2358/23189/7431/196/2887/9021/64121/84174/1536/1394/9475/2303/55971/10392/255738/10891/55022/6774/6261/773/2…
BP	GO:0097190	apoptotic signaling pathway	410	0.256648	1.68286	0.00104167	0.011147	0.00739296	2538	tags=29%, list=20%, signal=24%	6648/1051/3383/6280/3934/8531/8837/6279/2244/834/8440/6422/355/3570/6376/2023/2266/4690/1545/597/1075/81618/3428/1969/23581/837/5329/8326/8876/3958/54541/3091/5578/5743/64065/1612/3574/85450/3592/2950/7128/6934/6615/79156/30001/3965/5371/5457/7159/4217/5163/7164/5552/3553/10413/3002/7132/8739/7124/637/952/10625/5771/467/2243/972/4170/5295/8797/23643/9641/4118/7042/259230/929/3932/7046/1540/5788/8…
BP	GO:0002694	regulation of leukocyte activation	394	0.47206	3.0931	0.00104275	0.011147	0.00739296	2905	tags=54%, list=23%, signal=42%	1051/27242/3929/4067/136/64581/140885/10333/8440/57115/79679/6422/301/3570/6376/5621/7037/864/4690/30817/57162/1075/3620/8767/5359/8876/3600/3958/26191/80380/7525/8740/3574/3592/51083/677/115004/6347/7128/8808/2267/286410/9258/3718/201294/8651/3965/53833/200558/10673/3134/3559/678/64127/941/9308/56833/3553/634/3133/671/150372/100/5588/9760/952/10457/5771/3575/7412/11314/29851/9466/972/6352/5295/5…
BP	GO:0002757	immune response-activating signal transduction	404	0.436178	2.85699	0.00104275	0.011147	0.00739296	3500	tags=55%, list=28%, signal=41%	6280/27242/7097/5142/55765/3929/4067/6279/2633/64581/2244/10333/57115/79679/4651/5621/2266/4690/7096/57162/3783/118788/79931/8767/5359/94025/3958/8685/26191/8934/9473/330/7525/9404/338382/1520/7128/143662/5293/5336/23198/4057/9258/3656/60/10096/10010/64127/6197/5698/634/5641/4340/150372/100/5588/26253/952/5771/64135/10384/5144/11314/80216/2243/90268/5295/5063/3659/7321/3689/11213/23643/56940/1147…
BP	GO:0051272	positive regulation of cellular component movement	394	0.364581	2.38886	0.00104275	0.011147	0.00739296	3553	tags=49%, list=29%, signal=36%	6648/3383/4233/3929/4067/6364/1956/64581/3576/1906/9982/301/3570/1672/58191/22800/59341/152007/3958/3091/5578/5743/6662/8740/5962/3592/3918/6278/306/5293/6386/5629/2651/650/6615/1230/284/23075/6355/1907/3965/6869/5031/4851/6608/3640/3627/3553/3815/351/5641/2247/7124/284340/59352/7941/7852/10457/6354/25777/972/6352/4133/5295/5063/81029/80005/5156/81704/2113/116150/10000/8828/8877/64115/9806/50506/…
BP	GO:0002521	leukocyte differentiation	406	0.425408	2.78579	0.00104493	0.011147	0.00739296	3978	tags=59%, list=32%, signal=41%	1051/7097/4067/57115/6422/301/7037/864/84959/3428/8767/1969/1021/10537/56975/146433/8326/8876/3600/3976/26191/5578/3574/3592/3930/677/133522/8808/5293/5336/135228/6932/4057/222487/1230/286410/3718/8651/8581/3965/5457/8809/302/8792/3559/678/941/9308/56833/64919/634/3815/79705/11025/351/7124/150372/100/116071/5452/26253/9760/5771/3575/7412/112616/972/5295/3659/55509/10320/10288/567/1945/64115/11477…
BP	GO:0006875	cellular metal ion homeostasis	406	0.322587	2.11246	0.00104493	0.011147	0.00739296	2977	tags=40%, list=24%, signal=32%	1356/6280/3934/133/10686/4067/6279/57217/55503/7052/1906/6376/5621/7037/1258/59341/84959/1756/221074/8326/23007/2740/7018/2835/23566/3091/79054/6288/5336/4057/1230/57158/30001/23075/6355/1907/6869/5371/5031/302/79041/3627/344905/351/2247/4501/7852/3759/952/23413/817/27185/5144/6354/255231/6352/5156/1318/10663/1139/2359/7474/6263/958/2358/5737/9290/6357/5734/2904/1234/6556/3932/2495/6373/60675/139…
BP	GO:0040017	positive regulation of locomotion	405	0.360164	2.35821	0.00104493	0.011147	0.00739296	3553	tags=48%, list=29%, signal=36%	6648/3383/4233/3929/4067/6364/1956/64581/3576/1906/9982/301/3570/1672/58191/22800/59341/152007/3958/3091/5578/5743/6662/8740/5962/3592/3918/6278/306/5293/6386/5629/2651/650/6615/1230/284/23075/6355/1907/3965/6869/5031/4851/6608/3640/3627/3553/3815/351/5641/2247/7124/284340/59352/7941/7852/10457/6354/25777/972/6352/5295/5063/81029/858/80005/5156/81704/2113/116150/10000/8828/8877/64115/9806/50506/2…
CC	GO:0070161	anchoring junction	390	0.316466	2.0707	0.00104493	0.011147	0.00739296	3230	tags=41%, list=26%, signal=31%	1001/3383/23650/4478/1946/4067/1956/1525/7052/23092/301/22800/966/59341/2195/9019/1969/5329/23603/3696/4643/6282/6251/1824/3371/26136/23336/25996/7525/64065/5962/9404/6278/1466/5796/824/1825/976/6386/1830/11135/3801/55612/60/5817/3987/10096/4851/302/5754/4311/634/28513/87/6641/5493/1265/5500/390/5317/7791/58504/23676/3694/2196/10397/858/3689/3695/567/1803/1266/10095/4921/5318/10979/30011/7431/100…
CC	GO:0031012	extracellular matrix	374	0.323654	2.1085	0.00104603	0.011147	0.00739296	3888	tags=46%, list=31%, signal=33%	3383/1116/6280/6590/1946/5005/4316/6279/121227/5004/2244/145864/7052/5266/6422/64093/301/3914/2266/9508/5806/6281/1075/4240/5359/3958/401138/3371/84034/3574/3918/710/6278/9313/1520/4052/1476/653145/4064/5271/1286/7475/25975/55214/4321/10855/64129/157869/3965/84467/302/54507/5270/2734/5272/8838/3898/1299/10516/6649/7045/2243/4015/81029/8728/9806/114990/7474/4317/7042/6275/51435/4312/284217/27299/3…
BP	GO:0002446	neutrophil mediated immunity	376	0.409381	2.66656	0.00104712	0.011147	0.00739296	3881	tags=57%, list=31%, signal=40%	1116/6280/3934/6590/11240/7097/5337/5005/2919/6279/5004/140885/23200/5912/966/5806/1075/965/6518/5329/8876/3958/6282/10577/5284/11010/6278/2950/306/10562/1520/1476/5236/976/4057/6386/222487/23406/154664/6372/53831/201294/5873/10855/302/4311/4257/634/11025/1265/671/150372/51411/5317/5646/11314/10857/718/963/10288/3689/8560/567/2268/4860/23250/23601/126014/5724/3101/1794/4317/338339/2358/81567/3903…
BP	GO:0036230	granulocyte activation	384	0.414603	2.70778	0.00104712	0.011147	0.00739296	3831	tags=57%, list=31%, signal=41%	1116/6280/3934/6590/11240/7097/5337/5005/2919/6279/5004/140885/3576/23200/5912/966/5806/1075/965/6518/5329/8876/3600/3958/6282/10577/5284/11010/6278/2950/306/10562/1520/1476/5236/976/4057/6386/222487/23406/154664/6372/53831/201294/5873/10855/302/4311/4257/634/11025/1265/671/150372/51411/5317/5646/11314/10857/6352/718/963/10288/3689/8560/567/3606/2268/4860/23250/23601/126014/5724/8807/3101/1794/43…
BP	GO:0060627	regulation of vesicle-mediated transport	375	0.247622	1.61254	0.00104712	0.011147	0.00739296	2882	tags=32%, list=23%, signal=25%	4478/7097/4067/722/55503/136/64581/140885/2244/301/2266/3601/30817/5806/4240/22943/90019/7018/3600/3958/8934/5962/6347/5336/6386/8898/201294/284/5873/3965/3134/9783/4851/302/3553/634/55647/7447/2619/7124/321/23413/11314/2243/5562/4133/718/6382/3689/3561/717/274/567/8877/11037/2268/7474/5724/1794/3566/2358/11252/8724/929/6556/961/1394/5788/1138/3071/10859/10326/255738/2150/2207/8301/2213/5579/3356…
BP	GO:0043410	positive regulation of MAPK cascade	386	0.369519	2.41288	0.00104822	0.011147	0.00739296	3427	tags=47%, list=28%, signal=35%	3383/1116/4281/55765/8837/6364/136/1956/2244/10333/1906/84451/6376/2266/59341/22943/152007/8767/1852/197259/8685/3976/26191/23566/5578/6278/6288/6347/55816/6386/2651/650/1230/9258/284/3656/6355/26525/3965/5031/4851/4217/9294/8792/285016/353514/64127/7164/3553/3815/238/351/2247/7124/284340/7852/10457/26291/6354/2243/5562/972/6352/5063/3486/858/5156/6362/56940/8877/64170/1139/6351/7474/10913/1880/1…
BP	GO:0002009	morphogenesis of an epithelium	371	0.26001	1.69018	0.00104932	0.011147	0.00739296	3101	tags=35%, list=25%, signal=27%	157506/133/4478/4233/1956/3868/7052/1906/6422/25902/2348/22943/1969/54101/768/3853/220/3976/3091/3371/6662/6768/9420/5613/23198/5629/5268/650/6615/7475/3872/8543/3400/2119/4321/8463/5371/4851/5727/6608/5754/3627/5698/634/57057/10413/2247/7124/4919/7852/80326/8549/144165/7490/7474/5361/8324/25928/7042/284217/6664/9021/6868/79192/2316/2303/6663/9355/94234/10630/84870/57822/5690/30812/6259/26160/368…
BP	GO:0003013	circulatory system process	367	0.256302	1.66366	0.00104932	0.011147	0.00739296	2879	tags=32%, list=23%, signal=25%	6648/59342/25937/3383/1827/59272/133/5142/136/1956/1525/2244/1906/10135/2266/2296/59341/5465/1756/6518/5997/2740/1824/5743/7525/710/284/1907/6446/2982/4311/79041/3627/634/57057/10413/157378/100/7852/3759/952/817/5144/2243/6331/80005/4883/10659/2034/274/3269/3816/50848/6263/5724/23630/5318/7042/3775/444/2316/9475/145741/1285/2303/5606/3779/2150/6271/6261/80763/3356/91807/80852/4923/219537/1522/183…
BP	GO:0043312	neutrophil degranulation	369	0.409402	2.6613	0.00104932	0.011147	0.00739296	3881	tags=57%, list=31%, signal=40%	1116/6280/3934/6590/11240/7097/5337/5005/2919/6279/5004/140885/23200/5912/966/5806/1075/965/6518/5329/8876/3958/6282/10577/5284/11010/6278/2950/306/10562/1520/1476/5236/976/4057/6386/222487/23406/154664/53831/201294/5873/10855/302/4311/4257/634/11025/1265/671/150372/51411/5317/5646/11314/10857/718/963/10288/3689/8560/567/2268/4860/23250/23601/126014/5724/3101/1794/4317/338339/2358/81567/3903/1009…
BP	GO:2000147	positive regulation of cell motility	385	0.367793	2.40061	0.00104932	0.011147	0.00739296	3553	tags=49%, list=29%, signal=36%	6648/3383/4233/3929/4067/6364/1956/64581/3576/1906/9982/301/3570/1672/58191/22800/59341/152007/3958/3091/5578/5743/6662/8740/5962/3592/3918/6278/306/5293/6386/5629/2651/650/6615/1230/284/23075/6355/1907/3965/6869/5031/4851/6608/3640/3627/3553/3815/351/5641/2247/7124/284340/59352/7941/7852/10457/6354/25777/972/6352/5295/5063/81029/80005/5156/81704/2113/116150/10000/8828/8877/64115/9806/50506/29126…
MF	GO:0030545	receptor regulator activity	358	0.319553	2.07309	0.00105042	0.011147	0.00739296	4011	tags=48%, list=32%, signal=33%	133/1946/6374/2919/6364/3576/1906/10135/3570/6376/58191/22943/146433/2256/9966/2921/3600/3958/3976/8740/3574/3592/51083/6288/6347/9542/6289/6372/650/2920/6355/26525/1907/10068/8200/10673/4061/9235/3640/3627/6291/66004/8190/3553/2069/351/8838/2247/7124/5197/112609/10457/26291/6696/80326/6354/112616/6352/651/151647/6362/3606/6351/7474/131177/7042/5008/6357/3569/6373/4856/3084/10563/6367/6398/4049/2…
BP	GO:0042060	wound healing	378	0.300263	1.95542	0.00105042	0.011147	0.00739296	2872	tags=36%, list=23%, signal=28%	1001/8837/4067/6279/1956/64581/2244/1906/301/6376/2266/5912/966/5465/84959/9060/5359/5329/8326/3853/3091/5578/688/3371/84830/710/6288/3475/7128/5653/653145/5336/135228/4321/5873/10855/60/4851/4217/302/5754/2627/3640/5270/634/2069/10413/5493/2247/1608/59352/5197/5588/7852/2243/5295/3659/4015/81029/6382/158376/5156/81704/2113/5055/5341/50506/7474/8324/958/4638/7042/23189/3569/6556/3932/7046/6868/48…
BP	GO:0045860	positive regulation of protein kinase activity	382	0.275392	1.7945	0.00105042	0.011147	0.00739296	4593	tags=51%, list=37%, signal=33%	1116/1946/55765/136/1956/10333/1906/3570/84451/5621/54757/22943/8767/1852/9966/197259/23566/6288/51704/151195/4057/5629/650/7436/284/8651/3656/4217/113/9294/8792/285016/353514/64127/7164/3553/7804/3815/2069/238/2247/7124/284340/7852/11314/5562/972/6352/5063/8797/3606/1139/7474/108/4921/1849/10892/958/7042/3654/6556/7046/29969/653361/6868/60675/5788/8795/200958/3084/3937/2180/3071/5606/10392/9020/…
BP	GO:0002283	neutrophil activation involved in immune response	370	0.407707	2.6481	0.00105152	0.011147	0.00739296	3881	tags=56%, list=31%, signal=40%	1116/6280/3934/6590/11240/7097/5337/5005/2919/6279/5004/140885/23200/5912/966/5806/1075/965/6518/5329/8876/3958/6282/10577/5284/11010/6278/2950/306/10562/1520/1476/5236/976/4057/6386/222487/23406/154664/53831/201294/5873/10855/302/4311/4257/634/11025/1265/671/150372/51411/5317/5646/11314/10857/718/963/10288/3689/8560/567/2268/4860/23250/23601/126014/5724/3101/1794/4317/338339/2358/81567/3903/1009…
BP	GO:0030335	positive regulation of cell migration	370	0.370317	2.40525	0.00105152	0.011147	0.00739296	3553	tags=49%, list=29%, signal=36%	6648/3383/4233/3929/4067/6364/1956/64581/3576/1906/9982/301/3570/58191/22800/59341/152007/3958/3091/5578/5743/6662/8740/5962/3592/3918/6278/306/5293/6386/5629/2651/650/6615/1230/284/23075/6355/1907/3965/5031/4851/6608/3640/3627/3553/3815/351/5641/2247/7124/284340/59352/7941/7852/10457/6354/25777/972/6352/5295/5063/81029/80005/5156/81704/2113/116150/10000/8828/8877/64115/29126/6351/2268/7474/5724/…
BP	GO:0042110	T cell activation	370	0.489734	3.18087	0.00105152	0.011147	0.00739296	3017	tags=57%, list=24%, signal=44%	1051/3383/27242/4478/4067/1525/64581/140885/8440/79679/301/3570/5621/7037/864/4690/57162/3620/8767/1021/8876/3600/3958/26191/8934/80380/7525/8740/3574/3592/677/115004/6347/8808/5293/2267/6932/3718/8651/5873/3965/53833/10673/8809/3559/678/64127/941/9308/3553/64919/634/3815/3133/100/5588/26253/10457/5771/3575/7412/11314/29851/972/6352/5295/5063/3659/201633/10288/81704/567/56940/64115/3606/29126/924…
BP	GO:0001501	skeletal system development	359	0.328612	2.12929	0.00105263	0.011147	0.00739296	3941	tags=48%, list=32%, signal=34%	1116/157506/6715/145864/1906/6422/64764/864/25902/2296/59341/9060/1969/56975/3696/3091/50515/6662/5251/3198/133522/55553/139285/5358/4057/124976/4781/650/6615/2019/8200/302/2131/2734/6197/2114/3815/79705/84159/2247/4664/25884/56172/7045/55790/651/4015/81029/4883/5156/2268/7474/144347/7042/51435/5734/4188/5915/6664/7046/4856/5788/1749/2303/10859/56603/3037/4147/6261/4982/133308/4256/3209/285590/13…
CC	GO:0005912	adherens junction	379	0.3057	1.99072	0.00105374	0.011147	0.00739296	3230	tags=40%, list=26%, signal=30%	1001/3383/23650/4478/1946/4067/1956/1525/7052/23092/301/22800/966/59341/2195/9019/1969/5329/23603/3696/4643/6282/6251/1824/3371/26136/23336/25996/7525/5962/9404/6278/1466/5796/824/976/6386/11135/3801/55612/60/5817/3987/10096/4851/302/5754/4311/634/28513/87/6641/1265/5500/390/5317/7791/58504/23676/3694/2196/10397/858/3689/3695/567/1803/1266/10095/4921/5318/10979/30011/7431/10092/11252/57514/3897/5…
BP	GO:0008015	blood circulation	360	0.251852	1.6324	0.00105374	0.011147	0.00739296	2879	tags=32%, list=23%, signal=25%	6648/59342/3383/1827/59272/133/5142/136/1956/1525/2244/1906/10135/2266/2296/59341/5465/1756/6518/5997/2740/1824/5743/7525/710/284/1907/6446/2982/4311/79041/3627/634/57057/157378/100/7852/3759/952/817/5144/2243/6331/80005/4883/10659/2034/274/3269/3816/50848/6263/5724/23630/5318/7042/3775/444/2316/9475/145741/1285/2303/5606/3779/2150/6271/6261/80763/3356/91807/80852/4923/219537/1522/183/483/9474/26…
BP	GO:0031349	positive regulation of defense response	379	0.466638	3.03876	0.00105374	0.011147	0.00739296	2437	tags=46%, list=20%, signal=39%	1051/6280/9180/7097/55765/3929/4067/6279/136/1956/64581/2244/10333/7052/57115/154064/6376/2266/7096/59341/57162/79465/1075/118788/79931/3428/3620/8767/5359/94025/3600/8685/26191/5743/330/3592/80328/338382/1520/115004/51704/7128/143662/80329/5336/23198/4057/9258/3656/4321/115362/353091/5817/10133/3134/10010/84166/9447/8792/353514/64127/6197/3553/5698/2069/5641/7132/3133/7124/7941/26253/64135/5650/…
BP	GO:0042119	neutrophil activation	379	0.415336	2.70468	0.00105374	0.011147	0.00739296	3881	tags=57%, list=31%, signal=41%	1116/6280/3934/6590/11240/7097/5337/5005/2919/6279/5004/140885/3576/23200/5912/966/5806/1075/965/6518/5329/8876/3600/3958/6282/10577/5284/11010/6278/2950/306/10562/1520/1476/5236/976/4057/6386/222487/23406/154664/6372/53831/201294/5873/10855/302/4311/4257/634/11025/1265/671/150372/51411/5317/5646/11314/10857/6352/718/963/10288/3689/8560/567/3606/2268/4860/23250/23601/126014/5724/8807/3101/1794/43…
BP	GO:0002791	regulation of peptide secretion	355	0.309924	2.00595	0.00105708	0.011147	0.00739296	2690	tags=35%, list=22%, signal=29%	27242/1946/7097/5005/4067/3459/6279/2633/1956/5004/2244/10333/834/3556/79679/6422/301/6376/2266/7096/59341/3783/965/8767/2740/7850/26191/3091/5578/84830/6288/7128/6934/284/55612/8651/4321/26525/114769/3965/5371/9447/353514/6566/64127/5552/3553/7447/5208/3133/7124/26253/952/64135/27063/2243/9466/972/6352/440068/5066/29126/2268/7474/1803/23601/131177/4317/3566/958/7042/93978/5008/5734/91543/929/356…
BP	GO:0016055	Wnt signaling pathway	354	0.255278	1.65166	0.00105708	0.011147	0.00739296	3427	tags=38%, list=28%, signal=28%	1001/25937/4233/7097/1956/6422/83439/2348/22943/8796/8326/7091/6662/56033/51704/7128/139285/11197/5336/6932/23198/6934/650/245973/7475/4139/55612/6496/64359/4851/7088/5754/2300/5698/79705/10413/351/4919/59352/27185/80326/8549/144165/5562/90268/81029/6382/115701/898/7474/8324/25928/10979/23189/26524/4188/8724/2887/29969/27161/80114/1540/50964/30851/8434/1749/6663/84870/57822/79413/5690/374946/5744…
BP	GO:0072507	divalent inorganic cation homeostasis	355	0.333563	2.15896	0.00105708	0.011147	0.00739296	2977	tags=41%, list=24%, signal=32%	6280/133/4067/6279/55503/1956/7052/1906/6376/5621/1258/59341/84959/54757/1756/221074/8326/23007/2740/2835/23566/79054/6288/5336/1230/57158/30001/23075/6355/1907/6869/5371/5031/302/79041/3627/344905/351/2247/4501/7852/952/23413/817/27185/5144/6354/255231/6352/5156/10663/1139/2359/7474/6263/958/2358/5737/9290/6357/5734/2904/1234/6556/3932/6373/60675/1394/5788/10563/159371/1604/7781/5314/2150/6261/7…
BP	GO:0001819	positive regulation of cytokine production	357	0.452057	2.923	0.00105932	0.011147	0.00739296	3497	tags=57%, list=28%, signal=42%	1051/7097/5142/55765/3929/5005/3459/136/5004/64581/10333/834/3556/79679/301/3570/6376/1545/7096/59341/57162/3428/3620/965/8767/3595/3600/26191/3091/5743/330/3574/3592/6288/338382/115004/51704/8808/5336/55612/4321/115362/353091/10855/26525/3965/53833/3134/8809/9447/353514/64127/941/9308/3553/2069/351/3133/7124/150372/284340/5588/26253/64135/5144/9466/255231/972/5295/3659/718/201633/10288/23643/567…
BP	GO:0002683	negative regulation of immune system process	347	0.404628	2.6109	0.00106157	0.011147	0.00739296	3552	tags=51%, list=29%, signal=37%	1051/27242/11240/4067/2633/722/10333/57115/79679/9111/6422/301/6376/5621/864/966/57162/84959/3428/3620/3112/1021/3958/26191/80380/6662/84830/51083/9404/710/677/338382/6347/7128/2267/4057/9258/3718/284/8651/4321/3965/53833/3134/4851/84166/3559/941/56833/6318/634/11025/5272/3133/671/7124/100/10457/5771/3575/11314/9466/972/25939/5295/3659/201633/10288/11213/23643/56940/64115/114771/29126/942/3662/35…
BP	GO:1903706	regulation of hemopoiesis	346	0.349257	2.25322	0.00106157	0.011147	0.00739296	4221	tags=52%, list=34%, signal=35%	1051/4067/57115/6422/301/864/2296/84959/8767/1021/146433/8876/3600/3958/3976/3091/5578/3574/3592/677/133522/338382/8808/23198/4057/1230/286410/3718/8651/3965/5457/4851/3559/678/941/9308/56833/5698/634/11025/10413/7124/150372/100/5588/9760/5771/3575/972/5292/5295/3659/4015/10288/2113/567/64115/114771/3606/4860/942/3662/3566/10892/9290/5008/1378/604/1540/5788/3071/1493/10859/11006/6774/3594/56603/6…
CC	GO:0015629	actin cytoskeleton	348	0.256977	1.6571	0.00106383	0.011147	0.00739296	3182	tags=36%, list=26%, signal=27%	2633/301/4651/59341/2634/23603/1410/4643/7525/1612/5962/9404/824/9262/5236/80329/5358/23406/23012/84517/60/10096/345651/22998/154796/87/118611/1265/3898/4919/51411/3983/25932/7791/57584/7412/10602/6624/274/56940/2268/144347/1266/10095/4921/10979/4638/10092/2533/9050/165904/9124/6868/92521/283446/800/30851/4604/2316/55971/11170/7111/92241/7456/2037/83543/10518/140469/4606/3055/91807/55917/285590/2…
BP	GO:0048871	multicellular organismal homeostasis	341	0.281693	1.81321	0.00106383	0.011147	0.00739296	4085	tags=45%, list=33%, signal=31%	1051/1001/8842/25937/3934/9076/4233/55765/1956/1525/3868/7037/1258/2296/59341/84959/7018/3600/5578/5743/79054/5284/6662/3574/133522/7128/4057/2651/60/1907/23175/53833/29841/8809/57561/4851/113/6608/8792/64127/3553/79705/10413/7124/7852/112609/952/26291/6696/5562/340719/143689/4883/2034/10000/567/3606/108/3662/3566/9290/92211/3569/2171/6556/2887/6868/4585/51316/2180/2303/4069/10891/6774/56603/3037…
BP	GO:0055074	calcium ion homeostasis	325	0.332479	2.13405	0.00106383	0.011147	0.00739296	2977	tags=42%, list=24%, signal=33%	133/4067/55503/7052/1906/6376/5621/1258/59341/84959/54757/1756/8326/23007/2740/2835/23566/79054/6288/5336/1230/57158/30001/23075/6355/1907/6869/5371/5031/302/79041/3627/344905/351/2247/7852/952/23413/817/27185/5144/6354/255231/6352/5156/10663/1139/2359/7474/6263/958/2358/5737/9290/6357/5734/2904/1234/3932/6373/60675/1394/5788/10563/159371/1604/5314/2150/6261/773/84239/5579/10518/1729/123041/3356/…
BP	GO:0071900	regulation of protein serine/threonine kinase activity	348	0.257439	1.66009	0.00106383	0.011147	0.00739296	4905	tags=52%, list=39%, signal=32%	55765/4067/136/1956/10333/79616/1906/6422/84451/54757/22943/8767/1852/5997/197259/26191/23566/8900/6288/2950/7128/151195/4057/5629/650/10251/3656/60/11329/4217/9294/53632/8792/64127/7164/3553/3815/238/2247/7124/284340/7852/11314/5562/972/5063/11213/1139/898/7474/1849/958/3654/26524/6317/7046/29969/6868/60675/5788/200958/3084/2180/5606/10392/9020/6283/255324/54900/7345/2048/3356/221472/26973/21977…
BP	GO:0051051	negative regulation of transport	329	0.299808	1.9235	0.00106496	0.011147	0.00739296	3257	tags=39%, list=26%, signal=30%	3383/27242/7097/2633/140885/10333/1906/2564/6422/301/6376/2824/5997/8326/7850/1410/3958/3976/26191/5743/84830/7128/6386/8898/284/55612/26525/114769/3965/3134/5371/4851/5270/353514/5552/3553/634/7447/55432/7132/7124/100/817/11314/9466/972/10288/440068/274/131177/23630/5008/89870/5734/11252/91543/8724/2171/2887/961/29969/4856/1394/3084/7133/199713/10859/255738/55022/9448/79651/2150/8301/51311/2048/…
BP	GO:0051249	regulation of lymphocyte activation	324	0.485842	3.11525	0.0010661	0.011147	0.00739296	3017	tags=56%, list=24%, signal=44%	1051/27242/4067/64581/140885/8440/57115/79679/6422/301/3570/5621/7037/864/4690/57162/3620/8767/8876/3600/3958/26191/80380/7525/8740/3574/3592/51083/677/115004/6347/7128/8808/2267/286410/3718/8651/3965/53833/200558/10673/3134/3559/678/64127/941/9308/56833/3553/634/3133/150372/100/5588/9760/952/10457/5771/3575/7412/11314/29851/9466/972/6352/5295/5063/3659/201633/10288/81704/56940/64115/114771/3606/…
BP	GO:0001525	angiogenesis	338	0.369796	2.37401	0.00106724	0.011147	0.00739296	3975	tags=51%, list=32%, signal=36%	1116/133/3576/1906/9982/6422/301/6376/1545/2296/4240/1969/7101/3696/56913/3091/5578/688/5743/84830/6278/306/6347/7128/5613/51129/7453/9047/1286/284/10855/9289/5371/4851/2047/302/2627/6303/3627/7127/3553/634/154796/2069/57057/694/2247/284340/7852/25932/10457/7045/58504/90268/54583/718/3689/5156/2034/2113/116150/10000/8828/8877/3606/1139/7474/958/7042/3569/7046/27161/4856/1536/60675/8434/9475/10563…
BP	GO:0002250	adaptive immune response	334	0.518346	3.32313	0.00106724	0.011147	0.00739296	4027	tags=71%, list=32%, signal=49%	3383/27242/4067/722/2244/715/154064/79679/301/3570/716/7037/27074/79465/1075/3112/8767/80380/3426/3592/80328/710/1520/7128/80329/5293/2267/3718/201294/3108/23075/353091/5873/5817/10068/53833/200558/10673/3134/8809/6891/51279/113/8792/941/6890/3553/634/11025/3133/7124/100/5452/5588/5551/10384/3575/2243/3106/9466/255231/972/3659/718/10288/135250/717/567/56940/3606/29126/924/942/5971/8807/3662/3122/…
BP	GO:0045088	regulation of innate immune response	334	0.479369	3.07325	0.00106724	0.011147	0.00739296	2305	tags=46%, list=19%, signal=39%	6280/7097/55765/3929/4067/3459/6279/3455/64581/2244/10333/57115/154064/9111/2266/7096/57162/79465/118788/79931/3428/8767/5359/94025/8685/26191/330/3592/80328/710/338382/1520/115004/7128/143662/80329/5336/23198/4057/9258/8651/3656/4321/115362/353091/5817/3965/3134/10010/84166/9447/64127/56833/6318/6197/7804/5698/634/2069/5272/5641/3133/26253/3460/5771/64135/11314/80216/2243/6352/90268/25939/5063/3…
MF	GO:0048018	receptor ligand activity	333	0.333486	2.13924	0.00106724	0.011147	0.00739296	4887	tags=58%, list=39%, signal=36%	133/1946/6374/2919/6364/3576/1906/10135/3570/6376/58191/22943/146433/2256/9966/2921/3600/3958/3976/8740/3574/3592/51083/6288/6347/9542/6289/6372/650/2920/6355/26525/1907/8200/10673/9235/3640/3627/6291/8190/3553/2069/8838/2247/7124/5197/10457/26291/6696/80326/6354/112616/6352/651/151647/6362/3606/6351/7474/131177/7042/5008/6357/3569/6373/4856/3084/10563/6367/6398/4049/255324/338376/6369/8744/34638…
MF	GO:0050839	cell adhesion molecule binding	333	0.293964	1.88572	0.00106724	0.011147	0.00739296	4306	tags=48%, list=35%, signal=32%	1001/8842/3383/23650/4478/4067/1956/1525/2244/5214/301/6376/2023/114793/2266/4690/54798/4240/1969/7087/3696/6282/5578/26136/5962/10562/85377/25975/11135/23075/5817/53827/11329/302/9294/3553/28513/87/5493/1265/8838/2247/3898/5317/10516/10457/6696/5771/7045/7412/2243/3694/10397/10288/3689/3695/6624/3939/114990/50848/1266/8407/5318/26135/10666/11252/5818/9124/6868/4856/800/2316/3084/1285/55971/8301/…
BP	GO:0050900	leukocyte migration	338	0.459781	2.9517	0.00106724	0.011147	0.00739296	3835	tags=61%, list=31%, signal=44%	3383/6280/4478/11240/6374/5142/3929/4067/2919/6279/6364/1525/140885/3576/1906/301/3570/6376/58191/59341/30817/965/2921/3958/7525/8740/3592/84830/6278/6288/6347/9420/5293/124976/6372/1230/2920/54210/284/23075/8140/6355/26525/1907/3965/8792/6566/3627/56833/2734/3553/634/3815/351/5641/7124/100/284340/5197/7941/7852/7412/5144/11314/6354/9466/255231/972/6352/5295/6382/3689/8797/151647/3695/81704/6362/…
BP	GO:0072511	divalent inorganic cation transport	338	0.291439	1.87097	0.00106724	0.011147	0.00739296	3530	tags=43%, list=28%, signal=31%	3383/10686/196996/5142/4067/55503/6769/6376/5621/59341/3783/84959/342667/1756/221074/23007/3958/23566/5743/79054/6347/5336/79815/1230/57158/30001/6355/5371/5031/302/348938/79041/353514/3627/2247/7852/3759/23413/817/5144/117531/255231/6352/10288/274/84102/1139/6351/29927/6263/4638/152519/2904/1234/259232/6948/6556/140803/24145/3932/6373/1394/5788/159371/10859/7781/6271/6261/773/5579/23516/1729/123…
BP	GO:0098542	defense response to other organism	334	0.420217	2.69402	0.00106724	0.011147	0.00739296	3625	tags=53%, list=29%, signal=39%	1051/6280/3934/6590/7097/3929/6279/2633/3455/6364/64581/2244/10333/57115/3570/1672/3428/8767/1969/2634/5359/3600/3853/54541/330/3592/6278/306/10346/115004/7128/146857/4057/23406/91607/6372/201294/4321/26525/10133/5371/84166/9447/3559/3627/64127/56833/3553/6502/3588/4025/7132/3133/671/7124/116071/26253/5551/64135/5650/2243/9466/163351/25939/27350/3659/64108/114771/64170/25818/2268/3662/3566/338339…
BP	GO:0022604	regulation of cell morphogenesis	345	0.247244	1.59056	0.00106838	0.011147	0.00739296	4329	tags=46%, list=35%, signal=31%	3383/4478/1946/2633/2244/140578/301/4651/114793/2266/53335/8437/6281/23603/7101/23566/5962/221061/3475/10562/6347/11135/201294/4241/65249/3987/57194/6285/7804/3815/390/7852/6696/27185/6354/2243/4133/5063/80005/3689/10602/2268/7474/5361/10979/30011/23189/6357/3897/2316/3984/3037/6369/2048/10630/1729/752/221472/3055/374946/9762/6259/2049/23072/6383/223117/9723/23433/1808/10810/5911/51330/171177/580…
BP	GO:0090066	regulation of anatomical structure size	345	0.255481	1.64355	0.00106838	0.011147	0.00739296	3641	tags=39%, list=29%, signal=28%	6648/59342/3383/114908/59272/133/4478/1946/136/1956/2244/8440/1906/2266/4690/2296/59341/3783/5997/23566/5743/5962/3475/23406/11135/23075/1907/10096/2982/6557/84561/952/6696/27185/3575/2243/4133/5063/80005/10602/274/10000/3269/5341/7474/5724/10095/23189/10092/79822/3897/9475/3071/2303/55971/7111/3779/3984/2150/8301/11013/6369/83547/3356/3055/80852/374946/6259/219537/183/223117/9474/2643/9723/9732/…
BP	GO:0050708	regulation of protein secretion	340	0.307291	1.97319	0.00106952	0.011147	0.00739296	2690	tags=35%, list=22%, signal=28%	27242/1946/7097/5005/4067/3459/2633/1956/5004/2244/10333/834/3556/79679/6422/301/6376/2266/7096/59341/3783/965/8767/2740/7850/26191/3091/5578/84830/6288/7128/6934/284/55612/8651/4321/26525/114769/3965/5371/9447/353514/6566/64127/5552/3553/7447/5208/3133/7124/26253/952/64135/27063/2243/9466/6352/440068/5066/29126/2268/7474/1803/23601/131177/4317/3566/958/7042/93978/5008/5734/91543/929/3569/24145/4…
BP	GO:0070838	divalent metal ion transport	335	0.289977	1.85835	0.00107066	0.011147	0.00739296	3530	tags=42%, list=28%, signal=31%	3383/10686/196996/5142/4067/55503/6769/6376/5621/59341/3783/84959/342667/1756/221074/23007/3958/23566/5743/79054/6347/5336/79815/1230/57158/30001/6355/5371/5031/302/348938/79041/353514/3627/2247/7852/3759/23413/817/5144/117531/255231/6352/10288/274/84102/1139/6351/29927/6263/4638/152519/2904/1234/259232/6556/140803/24145/3932/6373/1394/5788/159371/10859/7781/6271/6261/773/5579/23516/1729/123041/3…
CC	GO:0005911	cell-cell junction	326	0.282023	1.80551	0.00107181	0.011147	0.00739296	3201	tags=37%, list=26%, signal=28%	1001/23650/9076/10686/8531/4067/1525/301/6523/5912/4690/2195/1969/2173/4643/6282/401138/1824/64065/5962/5796/1825/1830/10804/11135/3801/2707/5817/3987/10096/302/5754/23562/634/154796/3815/28513/87/5493/157378/1265/351/5317/25932/7791/3759/2196/9071/5295/10397/6331/963/6624/50848/1803/1266/5318/30011/284217/11252/54800/5818/24145/7046/9124/6868/4856/23037/2316/3937/79827/55971/6326/3702/1828/914/1…
BP	GO:0072503	cellular divalent inorganic cation homeostasis	344	0.333078	2.13997	0.00107181	0.011147	0.00739296	2977	tags=42%, list=24%, signal=33%	6280/133/4067/6279/55503/7052/1906/6376/5621/1258/59341/84959/1756/221074/8326/23007/2740/2835/23566/79054/6288/5336/1230/57158/30001/23075/6355/1907/6869/5371/5031/302/79041/3627/344905/351/2247/4501/7852/952/23413/817/27185/5144/6354/255231/6352/5156/10663/1139/2359/7474/6263/958/2358/5737/9290/6357/5734/2904/1234/6556/3932/6373/60675/1394/5788/10563/159371/1604/7781/5314/2150/6261/773/84239/55…
MF	GO:0004930	G protein-coupled receptor activity	314	0.260663	1.664	0.00107759	0.011147	0.00739296	4615	tags=47%, list=37%, signal=30%	266977/136/57211/23596/2842/30817/8326/2740/5995/2835/23566/51083/23432/51704/165829/976/222487/1230/53831/442197/9568/6869/9289/79627/5031/6608/9294/64106/27199/7852/8549/1128/4883/3269/8877/10663/2359/5724/1880/8324/2358/5737/9290/128674/53836/5734/1234/165140/29933/1394/117195/2150/2848/3356/887/4543/4923/2841/4992/59350/2692/2357/26659/1238/51554/1131/390077/553/84636/6785/2829/80835/10099675…
BP	GO:0006874	cellular calcium ion homeostasis	319	0.333153	2.12718	0.00107759	0.011147	0.00739296	2977	tags=42%, list=24%, signal=33%	133/4067/55503/7052/1906/6376/5621/1258/59341/84959/1756/8326/23007/2740/2835/23566/79054/6288/5336/1230/57158/30001/23075/6355/1907/6869/5371/5031/302/79041/3627/344905/351/2247/7852/952/23413/817/27185/5144/6354/255231/6352/5156/10663/1139/2359/7474/6263/958/2358/5737/9290/6357/5734/2904/1234/3932/6373/60675/1394/5788/10563/159371/1604/5314/2150/6261/773/84239/5579/10518/1729/123041/3356/887/55…
BP	GO:0019932	second-messenger-mediated signaling	314	0.28772	1.83673	0.00107759	0.011147	0.00739296	2902	tags=35%, list=23%, signal=28%	1827/133/55784/266977/2633/6364/136/57211/1956/3576/1906/23551/1672/5621/30817/1756/5997/2740/5578/6662/51083/23432/115004/5336/976/222487/1230/57158/1907/9289/2982/5031/57561/113/79041/3627/7124/100/7852/112609/817/7412/5144/8549/5562/3269/8877/10663/5341/6351/5152/108/2358/5737/196/5734/2904/1234/84174/2274/6373/1394/5788/51806/3084/91860/683/920/2770/183/59350/916/9454/2692/83988/5026/695/9472…
BP	GO:0045785	positive regulation of cell adhesion	319	0.438002	2.79663	0.00107759	0.011147	0.00739296	3233	tags=52%, list=26%, signal=40%	3383/4067/140885/2244/8440/7052/79679/6422/301/4651/3570/6376/2266/7037/864/4690/6281/8767/1021/8876/3600/6251/80380/5578/84034/7525/8740/3574/3592/6288/10562/6347/8808/2651/3718/25975/201294/284/55612/8651/3965/3987/9289/10673/3559/64127/941/9308/3553/3133/7124/100/5588/27185/3575/7412/29851/2243/972/6352/5295/5063/10288/80005/3689/81704/8728/2113/64115/9806/3606/29126/7474/4860/1803/942/5724/35…
BP	GO:0052547	regulation of peptidase activity	319	0.308779	1.97155	0.00107759	0.011147	0.00739296	2930	tags=37%, list=24%, signal=29%	5918/6280/6590/8837/4067/6279/64581/834/5266/355/144568/27074/3428/8767/837/5329/9966/1410/5743/728113/330/64065/1612/8740/25816/710/27151/1476/653145/5271/135228/23198/4057/5268/114769/3965/112399/26998/5371/4217/10010/9447/5270/6318/6197/5698/351/5272/5641/7124/637/718/440068/8797/274/64115/5055/64170/9806/1475/10892/6317/2904/1378/3932/89777/26577/444/8434/8795/9475/329/1285/199713/10392/1611/…
BP	GO:0030099	myeloid cell differentiation	308	0.294097	1.87338	0.00107875	0.011147	0.00739296	3967	tags=44%, list=32%, signal=31%	1051/7097/4067/6422/7037/84959/3428/1969/1021/10537/56975/146433/3600/3958/3976/3091/5578/3930/677/133522/338382/5613/5293/55553/135228/4057/1230/9258/3718/5371/5457/302/8792/634/3815/79705/11025/87/351/7124/116071/5588/5771/972/5295/4015/55509/10320/2034/2113/567/1945/5971/23601/126014/3662/1880/9290/10107/604/3071/10859/11006/6774/2150/2207/3394/3149/5579/3635/133308/920/149233/1437/159296/865/…
BP	GO:0050727	regulation of inflammatory response	288	0.448529	2.84805	0.00108108	0.011147	0.00739296	3530	tags=56%, list=28%, signal=41%	1051/6280/116379/9180/59272/7097/3929/4067/6279/722/136/1956/64581/140885/10333/7052/715/301/6376/716/966/59341/5465/1075/118788/3620/7850/3600/3426/5743/330/710/6288/2950/51704/7128/8808/9258/115362/53833/113/8792/3559/353514/64127/4907/56833/3553/7132/3133/7124/100/284340/7941/7791/5771/6352/90268/718/90527/717/6362/2113/8877/3606/7474/4317/1379/2358/5008/5734/4363/1378/3569/64838/3554/961/604/…
MF	GO:0001228	DNA-binding transcription activator activity, RNA polymerase II-specific	307	0.261538	1.66388	0.00108225	0.011147	0.00739296	5306	tags=58%, list=43%, signal=34%	1051/2120/26298/64764/5325/2296/5465/2001/5359/7101/3091/688/6662/3198/56033/9095/9516/4781/8061/2119/6496/5457/29841/4851/7545/9519/4904/64919/57057/6689/5452/5080/1761/467/3659/2034/2113/7490/4610/22877/3662/1871/6664/6775/1749/571/2303/6663/22797/5324/7022/6774/9355/346389/57822/9705/3229/5013/30812/3227/5307/30009/4211/6772/51193/5079/4791/7294/3206/5075/6688/4212/8320/2005/2000/7029/91975/32…
BP	GO:0002768	immune response-regulating cell surface receptor signaling pathway	303	0.417869	2.66213	0.00108225	0.011147	0.00739296	3500	tags=54%, list=28%, signal=40%	27242/5142/4067/2633/79679/4651/5621/4690/3783/8767/5359/94025/3958/26191/8934/9473/5284/7525/9404/143662/5293/5336/23198/60/10096/5698/634/3815/4340/150372/100/5588/26253/952/5771/10384/5144/11314/5295/5063/10288/56940/64170/2359/2268/5971/10095/3122/338339/10892/958/2358/93978/10092/4584/10666/2533/1378/3932/961/84174/1540/5788/200958/11119/4585/3937/3071/1493/10859/1380/11006/7456/3984/2207/54…
BP	GO:0002697	regulation of immune effector process	312	0.426132	2.71585	0.00108342	0.011147	0.00739296	4011	tags=60%, list=32%, signal=42%	3929/4067/722/136/57115/715/154064/301/716/7037/966/30817/79465/8767/3600/3958/3426/330/3592/80328/710/115004/51704/7128/80329/6372/3718/201294/284/4321/353091/5817/3965/53833/200558/3134/8809/9447/3559/64127/941/56833/6318/3553/634/5272/3133/7124/5650/3575/11314/3106/9466/972/718/135250/3689/717/11213/567/56940/114771/3606/25818/2268/7474/942/5724/8807/3662/3566/10892/1379/958/7042/89870/10666/3…
BP	GO:0006816	calcium ion transport	296	0.279414	1.77397	0.0010846	0.011147	0.00739296	4073	tags=47%, list=33%, signal=32%	3383/196996/5142/4067/55503/6769/6376/5621/59341/3783/84959/342667/1756/23007/3958/23566/5743/79054/6347/5336/1230/57158/30001/6355/5371/5031/302/79041/353514/3627/2247/7852/23413/817/5144/117531/255231/6352/10288/274/1139/6351/29927/6263/4638/2904/1234/259232/140803/24145/3932/6373/1394/5788/159371/10859/6271/6261/773/5579/1729/123041/3356/8291/55858/920/4923/356/183/10343/22821/9474/9454/6375/2…
BP	GO:0008544	epidermis development	290	0.367545	2.33187	0.0010846	0.011147	0.00739296	3157	tags=44%, list=25%, signal=33%	1001/25984/1956/3868/5266/301/3914/2296/3855/5465/22943/1969/23581/8796/3854/3887/3853/1824/9333/6662/64065/51083/3918/6278/677/1825/6768/643414/135228/1830/6615/3872/286887/3866/55612/10855/125115/3852/29841/5351/4851/5727/6608/3857/64919/9119/2069/10413/5493/7124/4664/1515/5080/5317/25932/80326/5650/8549/117531/3851/4610/25818/1475/7474/2012/10913/5318/25928/7042/3889/2171/60485/7051/51806/9475…
CC	GO:0043235	receptor complex	290	0.329252	2.08893	0.0010846	0.011147	0.00739296	4022	tags=50%, list=32%, signal=34%	9180/4233/7097/4067/1956/10333/2564/3570/7037/84171/7096/2568/1969/3595/7018/3696/5284/51704/165829/6386/650/26050/7436/53831/2051/9568/8809/4851/2047/3559/7804/634/3815/238/3588/351/7132/4919/55879/1439/9466/3359/972/3694/3689/3561/5156/3695/23643/567/8828/3824/1139/5361/8807/4921/3566/1379/958/3654/196/2904/6098/929/3569/7046/1138/329/7133/1380/926/1438/3594/54518/2048/923/3821/3684/4543/6259/9…
BP	GO:0048732	gland development	305	0.270444	1.72056	0.0010846	0.011147	0.00739296	3005	tags=36%, list=24%, signal=28%	1051/445/9076/4478/4233/6715/8837/1956/7052/6422/301/2296/1969/2001/220/3091/3371/6662/7128/9095/9420/2267/5629/5268/4781/650/8543/3400/2119/6496/5371/4851/5727/6608/2627/8792/5270/64919/634/84159/7124/100/5080/80326/5156/2113/7490/5066/7474/5361/10913/25928/7042/1448/284217/5915/7046/1394/3084/6663/205/255738/5324/7498/887/81606/11231/3219/3200/2049/3482/5307/2252/159296/768239/2692/4040/10481/6…
BP	GO:0052548	regulation of endopeptidase activity	296	0.317941	2.01857	0.0010846	0.011147	0.00739296	2930	tags=38%, list=24%, signal=30%	5918/6280/6590/8837/4067/6279/64581/834/5266/355/144568/27074/3428/8767/837/5329/9966/1410/5743/728113/330/64065/1612/8740/25816/710/27151/1476/653145/5271/135228/4057/5268/114769/3965/112399/26998/5371/4217/9447/5270/6318/6197/5698/351/5272/5641/7124/637/718/440068/8797/274/64115/5055/64170/9806/1475/10892/6317/2904/1378/3932/89777/444/8434/8795/9475/329/1285/199713/10392/1611/8710/6774/5265/830…
BP	GO:0032970	regulation of actin filament-based process	260	0.282686	1.78496	0.00108578	0.011147	0.00739296	2896	tags=36%, list=23%, signal=28%	3383/4233/1946/5142/8440/1906/6422/6376/4690/6281/2824/1824/5962/58527/23406/5629/11135/23075/10096/22998/1265/390/3759/817/5144/5295/5063/6331/10602/5156/6624/274/5066/5341/50848/10095/5318/23189/10092/5734/79822/7046/961/2316/9475/3071/55971/11170/7111/3984/2150/11013/6369/10630/57822/683/3055/91807/285590/55704/9723/23433/7114/4853/23616/171177/64857/10109/119/1436/120/286527/348110/1829/54509…
BP	GO:1903532	positive regulation of secretion by cell	286	0.293069	1.86057	0.00108578	0.011147	0.00739296	2329	tags=32%, list=19%, signal=26%	7097/5005/3459/136/1956/5004/2244/834/3556/1906/8564/79679/2266/7096/59341/3783/965/8767/26191/3091/51083/6288/6934/6386/201294/55612/4321/5873/3965/3134/9447/353514/64127/3553/7447/5208/3133/7124/26253/952/23413/6696/64135/27063/2243/6382/3689/29126/2268/7474/23601/5724/4317/3566/7042/93978/5008/5734/6664/929/3569/24145/1394/199713/51744/2150/2207/51311/2597/3552/914/84868/51762/3684/9367/4923/3…
BP	GO:0031589	cell-substrate adhesion	257	0.342409	2.16007	0.00108696	0.011147	0.00739296	4118	tags=52%, list=33%, signal=35%	1946/2633/2244/6422/3914/6376/2266/6281/2824/1021/23603/6251/84034/3918/10562/57348/5796/5613/2651/25975/201294/284/55612/4321/10855/4241/3987/10232/4851/2047/22998/87/7791/10516/27185/7412/2243/3694/2196/5295/80005/3689/3695/56940/9806/4921/8324/10979/23189/8910/3897/284348/604/10225/2316/4585/9475/11170/9448/3037/2199/10630/683/2049/64098/9723/83706/9928/916/51330/51144/5880/5328/5800/59339/811…
BP	GO:0032496	response to lipopolysaccharide	257	0.469905	2.96437	0.00108696	0.011147	0.00739296	2984	tags=51%, list=24%, signal=40%	1051/3383/3934/6590/445/9076/133/6374/7097/5142/3929/4067/2919/6279/140885/834/3576/1906/8564/6376/57162/79931/3620/8767/3595/2921/26191/80380/5578/5743/3592/6278/2950/824/6347/7128/4064/5336/9516/4057/6372/2920/10804/3656/26525/114769/3965/4851/8792/3627/64127/941/4257/6197/3553/671/7124/5197/27063/7412/5144/1439/6352/10288/440068/11213/23643/3606/29126/7474/942/5724/10892/5737/259230/3654/7431/…
BP	GO:0035690	cellular response to drug	257	0.284741	1.79627	0.00108696	0.011147	0.00739296	3781	tags=43%, list=30%, signal=30%	3383/3934/445/4233/1946/114907/6715/5142/8837/1956/140885/1906/6422/301/5621/7037/53335/2348/1545/8767/54541/26191/5743/6662/7128/60/4217/113/9447/79041/64127/56833/3553/7124/7852/26291/6354/5562/1128/2113/567/8877/1139/108/6263/5724/8807/7431/196/3569/1536/1317/9475/6663/10392/10891/3779/4314/6261/730249/10518/2230/2770/5911/1131/6688/969/2534/1244/8013/59338/9647/54658/1136/2983/11184/116372/27…
BP	GO:0051047	positive regulation of secretion	302	0.289757	1.8416	0.00108696	0.011147	0.00739296	2329	tags=31%, list=19%, signal=26%	7097/5005/3459/6279/136/1956/5004/2244/834/3556/1906/8564/79679/2266/7096/59341/3783/965/8767/26191/3091/51083/6288/6934/6386/201294/55612/4321/5873/3965/3134/9447/8792/353514/64127/3553/7447/5208/3133/7124/26253/952/23413/6696/64135/27063/2243/6382/3689/29126/2268/7474/23601/5724/4317/3566/7042/93978/5008/5734/6664/929/3569/24145/1394/199713/51744/2150/2207/51311/2597/3552/914/84868/51762/3684/9…
BP	GO:0051090	regulation of DNA-binding transcription factor activity	289	0.347841	2.20525	0.00108696	0.011147	0.00739296	3786	tags=49%, list=30%, signal=35%	3383/6280/7097/284434/8837/266977/6279/10333/3556/1906/6376/5621/1545/57162/8767/54101/133522/306/338382/10346/7128/6934/4057/222487/5629/8061/3656/6446/114769/3965/5457/8809/5727/6608/84166/9447/8792/64127/3553/7804/3815/84159/238/351/7124/150372/4919/5588/90268/5292/54583/3689/11213/8877/3606/7474/8807/4921/10892/958/3654/89870/4188/3569/1540/60485/2316/10392/10891/1611/6283/4794/6774/5314/7302…
CC	GO:0005925	focal adhesion	278	0.319323	2.02285	0.00108814	0.011147	0.00739296	3230	tags=41%, list=26%, signal=31%	3383/4478/1956/7052/23092/301/22800/966/59341/2195/9019/1969/5329/23603/3696/6251/3371/26136/25996/7525/5962/9404/6278/1466/824/976/6386/11135/55612/60/5817/3987/10096/5754/4311/87/6641/1265/5500/390/7791/58504/3694/858/3689/3695/567/1803/1266/10095/4921/10979/30011/7431/10092/11252/57514/3897/165904/9124/2274/6868/5788/2316/11170/3984/9448/2037/54518/83543/91624/3055/84951/8462/2275/3159/3482/10…
BP	GO:0022407	regulation of cell-cell adhesion	311	0.489929	3.11664	0.00108814	0.011147	0.00739296	3274	tags=59%, list=26%, signal=44%	1051/3383/27242/445/1946/4067/140885/2244/8440/79679/301/4651/3570/6376/5621/2266/7037/864/4690/59341/57162/5465/84959/3620/8767/8876/3600/3958/26191/80380/5578/7525/8740/3574/5962/3592/84830/6347/8808/2267/2651/650/3718/23075/8651/53827/3965/53833/10673/3559/5270/64127/941/9308/3553/634/3133/7124/100/5588/10457/5771/3575/7412/11314/29851/2243/972/6352/5295/5063/3659/201633/10288/3689/81704/8728/…
BP	GO:0050673	epithelial cell proliferation	263	0.317298	2.00241	0.00108814	0.011147	0.00739296	3844	tags=46%, list=31%, signal=32%	1051/1001/8837/1956/9982/6422/26298/864/1969/1021/2173/3091/5578/6662/677/5796/6347/7128/9420/5613/2267/135228/6934/5629/5268/4781/650/55612/4321/8200/4851/5727/6608/64127/64919/634/3815/2069/10413/2247/7124/5080/130367/8549/3851/6352/3486/858/6331/10000/567/8828/7474/8324/7042/11202/6664/7046/6868/4856/60485/7051/1749/255324/6774/3037/6369/7498/8291/26160/7039/57152/3849/2252/6772/4853/153090/60…
BP	GO:0001503	ossification	277	0.303508	1.92071	0.00108932	0.011147	0.00739296	4000	tags=45%, list=32%, signal=32%	1051/25937/1956/6422/64093/3570/22800/2296/2824/22943/1969/1021/56975/8326/3091/3371/5743/6662/5251/133522/4057/650/6615/1230/3400/8200/4851/5727/6608/2131/8792/5552/7124/4664/25884/10457/56172/6696/55790/651/3486/4015/50617/2268/7474/144347/23601/4921/7042/5734/6664/2132/3569/285313/50964/10492/1749/2303/6261/1836/4256/30812/285590/249/865/117581/6474/8600/9770/655/340419/1435/130497/6591/9188/9…
BP	GO:0002429	immune response-activating cell surface receptor signaling pathway	277	0.417017	2.63903	0.00108932	0.011147	0.00739296	3149	tags=51%, list=25%, signal=39%	27242/5142/4067/2633/79679/4651/5621/4690/3783/8767/5359/94025/3958/26191/8934/9473/7525/9404/143662/5293/5336/23198/60/10096/5698/634/4340/150372/100/5588/26253/952/5771/10384/5144/11314/5295/5063/56940/64170/2359/2268/5971/10095/3122/338339/10892/2358/93978/10092/4584/10666/2533/1378/3932/961/84174/1540/5788/200958/11119/4585/3937/3071/1493/1380/11006/7456/3984/2207/54900/53347/3123/696/9844/37…
MF	GO:0003779	actin binding	301	0.283966	1.8044	0.00108932	0.011147	0.00739296	4165	tags=47%, list=34%, signal=32%	4478/2633/1956/4651/114793/59341/1756/23603/4643/1730/6530/5962/653145/5358/23406/23012/55612/53827/10096/57553/22998/64127/634/87/6641/1265/3983/7852/9749/6624/274/1266/10095/10979/4638/6275/10092/1234/24145/9050/165904/9124/283446/170954/800/4604/2316/55971/11170/7111/92241/7456/2037/11013/84665/83543/1729/91624/140469/752/4606/55704/84951/2275/64098/83988/7114/10810/9051/22837/10083/7136/10109…
CC	GO:0005924	cell-substrate adherens junction	281	0.32244	2.04392	0.00108932	0.011147	0.00739296	4180	tags=51%, list=34%, signal=35%	3383/4478/1956/7052/23092/301/22800/966/59341/2195/9019/1969/5329/23603/3696/6251/3371/26136/25996/7525/5962/9404/6278/1466/824/976/6386/11135/55612/60/5817/3987/10096/5754/4311/87/6641/1265/5500/390/7791/58504/23676/3694/858/3689/3695/567/1803/1266/10095/4921/10979/30011/7431/10092/11252/57514/3897/165904/9124/2274/6868/5788/2316/11170/3984/9448/2037/54518/83543/10518/91624/3055/84951/8462/2275/…
BP	GO:0007159	leukocyte cell-cell adhesion	262	0.520286	3.28178	0.00108932	0.011147	0.00739296	3458	tags=65%, list=28%, signal=48%	1051/3383/6280/27242/445/4478/4067/6279/140885/8440/79679/301/3570/5621/7037/864/4690/57162/5465/3620/8767/8876/3600/3958/26191/80380/7525/8740/3574/3592/84830/6347/8808/2267/3718/8651/3965/53833/10673/3559/64127/4907/941/9308/3553/634/3133/7124/100/5588/10457/5771/3575/7412/11314/29851/972/6352/5295/5063/3659/201633/10288/3689/3695/81704/2113/56940/64115/3606/29126/4860/1803/942/5724/3566/10892/…
BP	GO:0007517	muscle organ development	269	0.268866	1.70063	0.00108932	0.011147	0.00739296	4214	tags=46%, list=34%, signal=31%	445/8531/8837/1906/140578/2296/22808/5465/22943/1756/5997/1410/3976/688/55553/5629/650/57158/5457/4851/2047/3344/6608/2627/3627/6285/84159/57057/10413/2247/27063/467/5562/5292/4015/858/7490/92737/7474/150572/5318/8324/4638/7042/8910/6664/7046/11023/63950/60485/4604/3084/2303/51676/3776/56603/6261/4606/30812/1310/2275/5307/497189/10472/4211/9472/5079/57462/9456/7004/6474/8320/55636/22953/7139/1482…
BP	GO:0014706	striated muscle tissue development	262	0.272472	1.71866	0.00108932	0.011147	0.00739296	4214	tags=47%, list=34%, signal=31%	8531/8837/1525/1906/2296/5465/22943/5997/688/3475/55553/5629/650/57158/5457/4851/2047/3344/6608/2627/6285/57057/10413/2247/27063/467/5562/5292/4015/858/5156/7490/115701/92737/7474/150572/5318/8324/7042/5915/6664/7046/11023/63950/60485/205428/4604/3084/2303/51676/3776/56603/6261/4606/91807/30812/1310/5307/183/9474/10472/4211/8470/9472/5079/57462/9456/811/6474/8320/55636/655/22953/7139/1482/9750/11…
CC	GO:0031252	cell leading edge	281	0.25712	1.62987	0.00108932	0.011147	0.00739296	4165	tags=46%, list=34%, signal=31%	2564/4651/59341/30817/2195/1969/1021/23603/6282/5962/50649/5796/8543/23075/55612/10096/302/6285/154796/87/351/3983/7852/81704/6624/56940/5341/50506/23710/5152/2268/1803/10979/4638/23189/7431/8910/10092/11252/57514/6868/23109/11170/7456/3984/54518/10630/83543/23516/1729/8291/221472/388325/55704/10253/1809/6277/10810/8470/154810/23616/51330/5880/5800/9051/64092/10109/9750/59338/4210/348110/11151/36…
BP	GO:0043062	extracellular structure organization	293	0.375024	2.37806	0.00108932	0.011147	0.00739296	3001	tags=43%, list=24%, signal=33%	3383/8837/4316/2244/3914/2266/1545/9508/84171/2296/5806/2824/9388/7101/7087/3696/4643/5352/3371/6662/84830/3918/9313/1520/824/6386/5268/1286/25975/30001/55612/4321/4241/6646/5351/4851/302/54507/79709/351/2247/7132/7124/1515/1299/7941/10516/6696/7045/5650/7412/2243/55790/3694/4015/6382/5360/3689/5156/3695/8728/6624/2113/7490/9806/25818/50848/1803/4921/4317/7042/4312/284217/196264/3569/7046/961/503…
BP	GO:0043588	skin development	250	0.380716	2.39633	0.00108932	0.011147	0.00739296	3128	tags=44%, list=25%, signal=33%	1001/25984/9076/4233/1956/3868/5266/301/2296/3855/22943/1969/23581/8796/3854/3887/3853/1824/9333/6662/64065/51083/6278/677/1825/6768/643414/135228/1830/6615/26050/3872/286887/3866/55612/2707/10855/125115/3852/29841/57561/4851/6608/3857/64919/9119/2069/10413/5493/7124/1515/5080/5317/25932/80326/8549/3851/25818/1475/7474/10913/5318/25928/7042/3889/60485/7051/9475/1514/9355/94234/56603/6261/1828/386…
CC	GO:0045177	apical part of cell	262	0.275751	1.73934	0.00108932	0.011147	0.00739296	2896	tags=34%, list=23%, signal=27%	8842/10568/9180/9076/4478/5337/1956/301/3570/6523/2348/59341/2195/115019/6518/7018/5962/51458/10804/362/8140/5873/5031/4851/91703/6557/4257/634/351/5641/1515/25932/7412/5144/1184/5562/50617/50506/151056/3938/1803/10913/4921/22802/4118/3775/140803/6868/1394/200958/10392/3776/5314/10630/1828/1836/133308/340990/56667/9481/8029/128338/389015/51421/8470/154810/9456/7379/7348/5800/10083/349633/6997/276…
CC	GO:0062023	collagen-containing extracellular matrix	291	0.331032	2.09906	0.00108932	0.011147	0.00739296	4434	tags=53%, list=36%, signal=35%	3383/6280/6590/1946/5005/6279/5004/2244/7052/6422/64093/301/3914/2266/9508/6281/1075/4240/5359/3958/401138/3371/84034/3574/3918/710/6278/1520/4052/1476/653145/5271/1286/25975/55214/64129/157869/3965/302/54507/5270/5272/3898/1299/10516/6649/7045/2243/81029/8728/7474/4317/7042/6275/51435/284217/27299/3897/89777/4856/50964/1285/1514/5265/4147/9510/2199/4256/2/11096/1310/5549/9507/3068/1508/2202/1302…
BP	GO:0001667	ameboidal-type cell migration	276	0.317543	2.00752	0.00109051	0.011147	0.00739296	3954	tags=48%, list=32%, signal=34%	4233/3868/1906/9982/301/2348/1545/152007/1969/23603/7101/3091/5578/5743/6662/84830/306/5613/5629/284/55612/5371/4851/6608/6273/3640/634/154796/3815/84159/5641/2247/5646/340719/2196/5063/80005/3689/3695/2113/116150/10000/8828/7474/1803/4921/958/7042/23189/7046/27161/6868/4856/9475/10563/2303/6663/5606/9448/3037/30812/411/183/3849/223117/9723/2252/7114/3458/51421/154810/23616/811/153090/6091/6997/5…
BP	GO:0003012	muscle system process	297	0.252246	1.59926	0.00109051	0.011147	0.00739296	4287	tags=46%, list=35%, signal=31%	59272/5142/8837/136/6769/1906/2023/5465/342667/1756/5997/3600/1410/1824/5578/5743/23336/1907/6869/2982/4851/2627/79041/3553/3815/57057/6641/7132/100/7852/3759/952/817/5144/23676/6331/80005/274/8877/5152/5724/23630/5318/4638/7431/60675/444/800/4604/2316/9475/7133/5606/90523/10891/7111/92241/6261/80763/3356/8291/4606/80852/8082/183/9732/497189/8470/10627/9472/5294/9456/1131/7136/5608/51196/7414/229…
MF	GO:0004175	endopeptidase activity	276	0.270776	1.71185	0.00109051	0.011147	0.00739296	3600	tags=39%, list=29%, signal=28%	59272/25825/8837/4316/54933/834/715/6422/716/9508/1075/23581/837/3426/5251/9313/1520/824/5653/6768/8492/260429/84000/4057/4321/7113/51279/4311/5655/5698/283471/3002/5641/1515/5646/5650/717/8728/3816/25818/1803/4317/10892/11202/4312/27299/827/6868/1514/255738/4314/7345/9510/64699/5690/11096/9507/83844/57646/1508/9718/1522/440854/843/838/10863/129293/360226/5328/84290/1509/3001/203100/5696/1521/915…
BP	GO:0007015	actin filament organization	276	0.303067	1.91599	0.00109051	0.011147	0.00739296	3182	tags=39%, list=26%, signal=30%	3383/4233/8440/6422/6376/4690/59341/6281/2195/23603/1730/5962/221061/133522/5358/23406/5629/11135/23075/10096/57553/22998/87/390/7791/5295/5063/10602/6624/274/5341/144347/10095/30011/23189/10092/5734/79822/7046/961/9050/165904/4604/2316/9475/3071/55971/11170/7111/7456/3984/2150/11013/6369/83543/1729/4606/3055/285590/9938/23433/1809/7114/10278/10810/8470/23616/171177/5880/9051/64857/10083/10109/11…
CC	GO:0030055	cell-substrate junction	284	0.322279	2.04258	0.00109051	0.011147	0.00739296	3230	tags=42%, list=26%, signal=31%	3383/4478/1956/7052/23092/301/22800/966/59341/2195/9019/1969/1756/5329/23603/3696/6251/3371/26136/25996/7525/5962/9404/6278/1466/824/976/6386/11135/55612/60/5817/3987/10096/5754/4311/87/6641/1265/5500/390/7791/58504/23676/3694/858/3689/3695/567/1803/1266/10095/4921/10979/30011/7431/10092/11252/57514/3897/165904/9124/2274/6868/5788/2316/11170/3984/9448/2037/54518/83543/10518/91624/3055/84951/8462/…
BP	GO:0030098	lymphocyte differentiation	276	0.443194	2.80188	0.00109051	0.011147	0.00739296	3978	tags=63%, list=32%, signal=44%	57115/6422/301/864/8767/1021/8326/8876/3600/26191/3574/3592/677/8808/5293/5336/6932/222487/286410/3718/8651/8581/3965/8809/3559/678/941/9308/56833/64919/3815/150372/100/5452/26253/9760/5771/3575/7412/112616/972/5295/3659/10320/10288/567/64115/114771/3606/4860/942/5971/3662/1794/1880/3566/338339/8324/10892/5734/91543/1378/3569/3932/604/6868/1540/5788/3071/1493/1380/11006/338376/6774/3594/2207/5660…
BP	GO:0030198	extracellular matrix organization	256	0.399907	2.51894	0.00109051	0.011147	0.00739296	3001	tags=45%, list=24%, signal=35%	3383/8837/4316/2244/3914/2266/1545/9508/84171/2296/5806/2824/7101/7087/3696/4643/5352/3371/6662/84830/3918/9313/1520/824/5268/1286/25975/30001/55612/4321/4241/5351/4851/302/54507/79709/351/2247/7132/7124/1515/1299/10516/6696/7045/5650/7412/2243/55790/3694/4015/3689/5156/3695/8728/6624/2113/7490/9806/25818/50848/1803/4921/4317/7042/4312/284217/196264/3569/7046/961/5033/8434/7133/1285/10549/2303/15…
BP	GO:0030900	forebrain development	274	0.253956	1.60545	0.00109051	0.011147	0.00739296	4204	tags=44%, list=34%, signal=30%	6715/1956/597/139411/54149/22943/1021/2173/7101/220/3091/306/9095/5629/4781/650/26050/3400/6496/9289/5457/4851/6608/2131/7804/64919/84879/238/351/5080/7852/27185/25777/6331/2113/567/8828/7474/10092/5915/63950/1394/2316/1749/3084/10891/9355/2048/64211/5013/374946/3684/6259/2049/23287/5307/9928/2692/5079/4040/153090/6091/1459/8320/1436/55636/2534/8013/5992/8829/6531/6722/5308/6491/27023/8482/80709/…
BP	GO:0018108	peptidyl-tyrosine phosphorylation	264	0.361037	2.27707	0.0010917	0.011147	0.00739296	3458	tags=48%, list=28%, signal=35%	3383/116379/4233/1946/4067/1956/8440/6422/3570/5621/5912/8767/1969/3595/3600/3976/7525/3574/3592/51704/3718/2051/284/8651/2047/285016/353514/941/7804/3815/79705/2069/238/351/7132/7124/4919/5771/11314/972/6352/3689/5156/56940/3606/2268/4921/958/5008/6503/6098/3569/3932/9021/653361/6868/5788/3084/5606/255324/6774/2048/3702/683/3356/3055/6259/920/149233/2202/2049/389658/7039/1437/183/100133941/2252/…
BP	GO:0050863	regulation of T cell activation	251	0.504826	3.17349	0.0010917	0.011147	0.00739296	3057	tags=59%, list=25%, signal=46%	1051/27242/4067/140885/8440/79679/301/3570/5621/7037/864/4690/57162/3620/8767/8876/3600/3958/26191/80380/7525/8740/3574/3592/115004/6347/8808/2267/3718/8651/3965/53833/10673/3559/64127/941/9308/3553/634/3133/100/5588/10457/5771/3575/7412/11314/29851/972/6352/5295/5063/3659/201633/10288/81704/56940/64115/3606/29126/4860/1803/942/3662/3566/10892/3109/1378/3569/3932/961/604/1540/5788/7133/3071/1493/…
BP	GO:0071496	cellular response to external stimulus	251	0.275941	1.73465	0.0010917	0.011147	0.00739296	4451	tags=48%, list=36%, signal=32%	3383/3934/6715/4067/4316/136/1956/834/6422/10135/355/53335/2348/58528/3428/3600/1824/3371/5743/6662/8740/5251/2950/8061/4217/7378/3553/6502/1265/7132/1515/3759/10991/27063/7412/467/5562/5292/3659/441925/8797/23710/6263/958/5734/64121/1536/5788/8795/943/255738/9020/1611/11170/968/51311/7100/10518/3920/3992/183/9474/838/4615/867/2534/9750/1111/6591/476/6722/51100/7184/5028/1647/875/654/3077/154743/…
BP	GO:0045089	positive regulation of innate immune response	282	0.464359	2.94055	0.0010929	0.011147	0.00739296	2305	tags=45%, list=19%, signal=38%	6280/7097/55765/3929/4067/6279/64581/2244/10333/57115/154064/2266/7096/57162/79465/118788/79931/3428/8767/5359/94025/8685/26191/330/3592/80328/338382/1520/115004/7128/143662/80329/5336/23198/4057/9258/3656/4321/115362/353091/5817/3134/10010/84166/9447/64127/6197/5698/2069/5641/3133/26253/64135/11314/80216/2243/6352/90268/5063/3659/7321/135250/3689/11213/23643/114771/81030/64170/9641/7474/5971/880…
BP	GO:0060537	muscle tissue development	272	0.280216	1.77063	0.0010929	0.011147	0.00739296	4214	tags=47%, list=34%, signal=32%	8531/8837/1525/1906/2296/5465/22943/5997/688/6662/1466/3475/55553/5629/650/57158/5457/4851/2047/3344/6608/2627/6285/57057/10413/2247/27063/467/5562/5292/4015/858/5156/7490/115701/92737/7474/150572/5318/8324/4638/7042/5915/6664/7046/11023/63950/60485/205428/4604/3084/2303/51676/10891/3776/56603/6261/4606/91807/30812/1310/5307/183/9474/10472/4211/8470/9472/5079/57462/9456/811/6474/8320/55636/655/22…
CC	GO:0009897	external side of plasma membrane	254	0.476473	2.99864	0.00109409	0.011147	0.00739296	3517	tags=61%, list=28%, signal=45%	3383/114908/9180/1946/2244/154064/79679/301/3570/5621/2266/7037/2348/966/79465/4240/3595/7018/80380/79054/80328/3604/824/80329/1230/353091/3134/4217/8792/3559/5270/3627/941/9308/154796/3815/4340/3133/7124/100/1515/7852/10384/3575/7412/29851/2243/3106/9466/117531/972/3694/6382/135250/3689/3561/5156/567/10663/3824/29126/9332/942/958/10666/1234/929/3554/5788/11119/1493/10859/51744/255738/1438/3105/5…
BP	GO:0010959	regulation of metal ion transport	258	0.296608	1.8675	0.00109409	0.011147	0.00739296	4404	tags=53%, list=35%, signal=35%	3383/196996/5142/4067/6769/3787/6376/5621/84959/342667/1756/7018/3958/23566/5743/3755/51083/6347/5336/1230/57158/53827/5371/5031/302/5270/79041/353514/3627/7852/3759/817/5144/117531/6352/6331/10288/1318/274/567/6351/23630/2745/5318/4638/54800/6373/1394/2316/10859/255738/3779/6271/1729/3356/8291/55532/920/4923/23072/183/483/9474/9454/6375/5026/3458/8832/9472/5294/9456/53826/55636/162514/4283/22953…
BP	GO:0043900	regulation of multi-organism process	292	0.302295	1.91499	0.00109409	0.011147	0.00739296	3831	tags=45%, list=31%, signal=32%	6590/64581/3576/57115/6376/27074/5806/3428/8767/5359/3600/3853/5578/330/115004/7128/4064/4057/5629/6372/4321/6355/114769/3965/10133/7113/5371/4851/302/9447/3559/3553/10184/7124/100/7852/5551/5650/972/6352/27350/858/23643/114771/6351/151056/25818/5724/6732/89870/91543/10107/8724/29969/27161/79720/329/1604/10549/10859/10392/3594/2150/730249/2597/84868/7105/85363/920/149233/3482/5047/10758/940/3458/…
BP	GO:0050867	positive regulation of cell activation	255	0.484075	3.04706	0.00109409	0.011147	0.00739296	3057	tags=57%, list=25%, signal=44%	3929/4067/136/64581/140885/10333/8440/79679/301/3570/7037/864/4690/57162/1075/8767/8876/3600/80380/7525/8740/3574/3592/6347/8808/286410/3718/8651/3965/10673/3134/3559/353514/64127/941/9308/3553/3133/100/5588/9760/952/3575/7412/29851/972/6352/5295/5063/10288/3689/81704/64115/5341/3606/29126/2268/7474/4860/1803/942/5724/1880/4317/3566/338339/10892/958/10666/3109/3569/3932/961/604/1540/1394/5788/307…
BP	GO:0070482	response to oxygen levels	254	0.291006	1.83142	0.00109409	0.011147	0.00739296	1761	tags=27%, list=14%, signal=23%	3383/133/7097/8837/1906/6422/10135/355/2023/5465/768/1410/54541/5352/3091/5743/677/824/51129/23198/650/30001/114769/112399/5371/5351/4851/2627/6285/5163/5698/27087/100/7852/952/6649/27063/7412/5562/54583/10397/2034/2113/3939/5066/114990/1139/1803/7042/3654/57103/9124/6868/1536/1394/79723/9475/329/571/4049/205/10891/3776/3779/6326/6261/5690/5230
BP	GO:0002237	response to molecule of bacterial origin	267	0.477068	3.00925	0.00109529	0.011147	0.00739296	2984	tags=52%, list=24%, signal=40%	1051/3383/3934/6590/445/9076/133/6374/7097/5142/55765/3929/4067/2919/6279/140885/10333/834/3576/1906/8564/6376/7096/57162/79931/3620/8767/3595/2921/26191/80380/5578/5743/3592/6278/2950/824/6347/7128/4064/5336/9516/4057/6372/2920/10804/3656/26525/114769/3965/4851/8792/3627/64127/941/4257/6197/3553/671/7124/5197/27063/7412/5144/1439/6352/10288/440068/11213/23643/567/64170/3606/29126/7474/942/5724/1…
BP	GO:0002696	positive regulation of leukocyte activation	248	0.483216	3.03265	0.00109529	0.011147	0.00739296	3057	tags=57%, list=25%, signal=44%	3929/4067/136/64581/140885/10333/8440/79679/301/3570/7037/864/4690/57162/1075/8767/8876/3600/80380/7525/8740/3574/3592/6347/8808/286410/3718/8651/3965/10673/3134/3559/64127/941/9308/3553/3133/100/5588/9760/952/3575/7412/29851/972/6352/5295/5063/10288/3689/81704/64115/3606/29126/2268/7474/4860/1803/942/5724/1880/4317/3566/338339/10892/958/10666/3109/3569/3932/961/604/1540/1394/5788/3071/1493/1604/…
BP	GO:0018212	peptidyl-tyrosine modification	267	0.359254	2.2661	0.00109529	0.011147	0.00739296	3458	tags=48%, list=28%, signal=35%	3383/116379/4233/1946/4067/1956/8440/6422/3570/5621/5912/8767/1969/3595/3600/3976/7525/3574/3592/51704/3718/2051/284/8651/2047/285016/353514/941/7804/3815/79705/2069/238/351/7132/7124/4919/5771/11314/972/6352/3689/5156/56940/3606/2268/4921/958/5008/6503/6098/3569/3932/9021/653361/6868/5788/3084/5606/255324/6774/2048/3702/683/3356/3055/6259/920/149233/2202/2049/389658/7039/1437/183/8460/100133941/…
CC	GO:0031983	vesicle lumen	248	0.351788	2.20781	0.00109529	0.011147	0.00739296	4095	tags=52%, list=33%, signal=36%	1116/6280/3934/6590/11240/5005/2919/6279/1956/5004/2244/2266/5806/1075/7018/6282/10577/710/6278/6288/2950/10562/1476/4057/6386/23406/201294/5873/10855/302/5552/87/1265/351/671/100/51411/2243/718/567/2268/4860/126014/3101/1794/4317/81567/7042/10092/6317/23071/2171/51316/10549/4069/6283/8566/5265/8836/10578/2/240/3608/411/1522/356/10525/83706/4332/7114/64333/25801/2219/51571/2153/1509/811/2760/1048…
BP	GO:0045861	negative regulation of proteolysis	247	0.276072	1.7322	0.00109529	0.011147	0.00739296	2930	tags=34%, list=24%, signal=27%	5918/6590/8837/722/5266/144568/5621/966/27074/3428/5329/7850/1410/5743/728113/330/8740/25816/710/27151/1476/653145/5271/135228/4057/6386/5268/114769/26998/5371/5270/2734/6318/6197/55432/351/5272/2619/718/440068/274/5055/9806/1475/6317/1378/89777/8434/329/1285/1604/199713/8710/5265/8301/51465/2597/2/8530/725/1522/871/183/9683/11326/1459/79094/51377/5627/1474/29761/1942/51050/89932/6622/1447/6690/5…
CC	GO:0060205	cytoplasmic vesicle lumen	247	0.348843	2.1888	0.00109529	0.011147	0.00739296	4095	tags=52%, list=33%, signal=35%	1116/6280/3934/6590/11240/5005/2919/6279/5004/2244/2266/5806/1075/7018/6282/10577/710/6278/6288/2950/10562/1476/4057/6386/23406/201294/5873/10855/302/5552/87/1265/351/671/100/51411/2243/718/567/2268/4860/126014/3101/1794/4317/81567/7042/10092/6317/23071/2171/51316/10549/4069/6283/8566/5265/8836/10578/2/240/3608/411/1522/356/10525/83706/4332/7114/64333/25801/2219/51571/2153/1509/811/2760/10487/299…
BP	GO:0051604	protein maturation	238	0.295524	1.84936	0.00109769	0.011147	0.00739296	2719	tags=33%, list=22%, signal=26%	59272/25825/722/2244/834/715/2023/5621/716/2266/966/9508/3428/8767/7850/3426/330/64065/710/1520/824/5653/8492/30001/4241/114769/7113/302/51279/5727/4311/5270/2734/5552/3553/340348/5641/2619/5646/2243/718/717/3816/64115/80218/9532/1379/1378/444/329/1604/10549/199713/1380/255738/5230/2/8530/26160/9718/725/745/1522/871/84909/11326/5328/811/79094/732/5627/9159/5992/930/119587/26085/4323/405753
BP	GO:0051480	regulation of cytosolic calcium ion concentration	244	0.351995	2.20514	0.0010989	0.011147	0.00739296	3509	tags=50%, list=28%, signal=36%	133/4067/55503/7052/1906/6376/5621/1258/59341/84959/1756/8326/23007/2740/23566/6288/5336/1230/57158/30001/23075/1907/6869/5371/5031/302/79041/3627/2247/7852/952/23413/817/5144/255231/5156/10663/2359/7474/6263/2358/5737/9290/5734/2904/1234/3932/6373/60675/1394/5788/10563/159371/1604/2150/6261/773/10518/1729/3356/887/920/4923/2841/356/183/4828/100133941/22821/9474/6375/114897/5026/9472/5294/4040/23…
BP	GO:0070997	neuron death	244	0.276357	1.73129	0.0010989	0.011147	0.00739296	4120	tags=48%, list=33%, signal=32%	135112/6648/1051/27242/10333/8564/10135/6376/5621/22800/5465/22943/8326/54541/8934/3091/824/6347/284/2019/57707/112399/8200/3134/5457/7159/4217/2047/351/5641/23321/7124/637/10457/26291/6352/4170/5063/3689/128434/1139/7474/7042/57103/2904/1394/7133/255738/10891/3812/6326/6774/94234/8301/2597/2213/55532/4909/374946/3684/9481/1522/5803/356/10525/9928/3458/8882/867/2534/8013/1435/11151/131450/8829/66…
BP	GO:0007568	aging	227	0.292485	1.82007	0.00110011	0.011147	0.00739296	4180	tags=46%, list=34%, signal=31%	6648/3383/445/9076/8942/133/4316/3868/1906/8564/10135/6376/5621/597/1075/22943/1021/3600/1410/5743/710/115004/9516/10804/30001/3987/5371/4311/10783/351/100/1515/7412/5144/3689/10000/567/3889/3654/604/7133/3805/10891/3779/6774/968/8301/3861/3635/3356/55532/5549/11231/3159/183/2692/5933/5079/4791/811/3651/391723/1111/545/6531/6722/6622/218/4353/5028/472/1490/9104/1029/2706/2290/3586/7077/1644/79677…
CC	GO:0045121	membrane raft	227	0.397385	2.47284	0.00110011	0.011147	0.00739296	4224	tags=61%, list=34%, signal=41%	3383/59272/1946/7097/8837/4067/1956/1525/10333/7851/355/5621/5912/7096/6281/2824/1756/5359/23603/5743/330/79054/6530/84830/824/6386/284/10855/9289/2047/302/5727/6608/4311/7804/351/7132/7124/858/6331/3689/1139/1803/108/4118/10666/11252/929/3932/7046/6868/54742/5788/329/3937/7133/1604/3037/10630/3635/3920/914/3356/3055/5230/3684/962/920/2770/4923/871/356/100133941/483/23433/695/9472/4040/1509/6997/…
BP	GO:0032147	activation of protein kinase activity	239	0.288156	1.80042	0.00110254	0.011147	0.00739296	2853	tags=35%, list=23%, signal=27%	1116/1946/55765/136/1956/10333/3570/84451/5621/8767/1852/9966/197259/23566/6288/51704/650/284/8651/3656/4217/113/9294/64127/3553/3815/238/2247/7124/284340/7852/11314/5562/972/6352/5063/8797/3606/1139/7474/108/1849/10892/7042/3654/6556/7046/29969/60675/5788/8795/200958/3084/3071/5606/10392/9020/255324/9448/55704/149233/7039/3735/183/9928/23118/2357/153090/8600/5608/6997/51196/1326/28984/1136/11184…
BP	GO:0036293	response to decreased oxygen levels	239	0.307493	1.92124	0.00110254	0.011147	0.00739296	1761	tags=28%, list=14%, signal=25%	3383/133/7097/8837/1906/6422/10135/2023/5465/768/1410/54541/5352/3091/5743/677/824/51129/23198/650/30001/114769/112399/5371/5351/4851/2627/6285/5163/5698/27087/100/7852/952/6649/27063/7412/5562/54583/10397/2034/2113/3939/5066/114990/1139/1803/7042/3654/57103/9124/6868/1536/1394/79723/9475/329/571/4049/205/10891/3776/3779/6326/6261/5690/5230
BP	GO:0050678	regulation of epithelial cell proliferation	226	0.313977	1.95054	0.00110254	0.011147	0.00739296	3844	tags=46%, list=31%, signal=32%	1001/8837/1956/9982/6422/864/1021/3091/5578/6662/677/5796/6347/7128/9420/135228/6934/5629/5268/4781/650/4321/8200/4851/5727/6608/64127/64919/634/2069/10413/2247/7124/5080/130367/3851/6352/858/6331/10000/567/8828/7474/8324/7042/6664/7046/6868/60485/7051/1749/255324/6774/3037/6369/7498/8291/26160/7039/57152/2252/6772/4853/153090/6091/1750/5467/120425/2683/8013/55801/130497/6591/28984/8829/2254/654/…
BP	GO:0010721	negative regulation of cell development	229	0.266508	1.65669	0.00110375	0.011147	0.00739296	3455	tags=38%, list=28%, signal=28%	1946/2633/6376/53335/59341/5465/81618/22943/56963/23603/5997/7101/8934/6662/51083/3475/4057/3400/6496/4241/9289/4851/30012/3553/351/7124/5080/952/6696/4133/567/7474/144347/23189/7431/11202/6664/7274/64843/3569/11023/3084/10859/6663/9448/6774/9355/282969/2048/2672/374946/30812/3418/6259/1522/5047/223117/9723/1809/4211/25871/5800/811/655/50807/1942/8829/9423/8482/25791/26228/10507/2043/7533/3066/50…
CC	GO:0016324	apical plasma membrane	219	0.286168	1.76381	0.00110375	0.011147	0.00739296	2567	tags=32%, list=21%, signal=26%	8842/10568/9180/9076/4478/5337/1956/301/3570/6523/2348/59341/2195/115019/6518/7018/5962/51458/10804/362/8140/5873/5031/4851/91703/6557/634/5144/5562/50617/50506/151056/3938/1803/4921/22802/4118/3775/140803/6868/200958/10392/3776/5314/10630/1828/1836/133308/340990/56667/8029/128338/389015/51421/8470/154810/7379/7348/5800/349633/6997/2760/4008/8323/22953/1244/9750/56606/1829/6712/476
CC	GO:0098857	membrane microdomain	228	0.398777	2.48041	0.00110375	0.011147	0.00739296	4224	tags=61%, list=34%, signal=41%	3383/59272/1946/7097/8837/4067/1956/1525/10333/7851/355/5621/5912/7096/6281/2824/1756/5359/23603/5743/330/79054/6530/84830/824/6386/284/10855/9289/2047/302/5727/6608/4311/7804/351/7132/7124/858/6331/3689/1139/1803/108/4118/10666/11252/929/3932/7046/6868/54742/5788/329/3937/7133/1604/3037/10630/3635/3920/914/3356/8291/3055/5230/3684/962/920/2770/4923/871/356/100133941/483/23433/695/9472/4040/1509/…
BP	GO:0045862	positive regulation of proteolysis	243	0.295324	1.84657	0.00110497	0.011147	0.00739296	3274	tags=39%, list=26%, signal=29%	6280/154214/8837/4067/6279/64581/834/355/2023/1075/3428/8767/837/9966/64065/1612/23198/4241/3965/112399/5371/4217/10010/9447/3553/351/5641/7124/637/27185/144165/718/8797/64115/64170/9532/10892/6317/2904/1378/3932/26577/444/8795/9475/7133/1285/10392/1611/6774/149628/8301/9705/7498/25897/58484/127544/3735/356/28951/8743/3458/843/838/1509/153090/6091/1601/2534/153769/4210/9647/10017/1942/114548/6622…
BP	GO:0030111	regulation of Wnt signaling pathway	242	0.292486	1.82728	0.00110742	0.011147	0.00739296	3380	tags=40%, list=27%, signal=30%	1001/25937/7097/1956/6422/83439/2348/22943/8796/8326/7091/6662/56033/51704/7128/139285/11197/23198/6934/650/245973/55612/6496/64359/4851/7088/5754/2300/5698/79705/10413/351/59352/27185/8549/144165/90268/81029/115701/7474/8324/25928/23189/26524/4188/8724/2887/29969/80114/1540/50964/30851/8434/1749/6663/84870/79413/5690/374946/219771/23072/27120/865/50943/129293/4040/5800/153090/5696/1601/85407/228…
BP	GO:0034612	response to tumor necrosis factor	225	0.395066	2.44825	0.00110742	0.011147	0.00739296	2305	tags=38%, list=19%, signal=32%	3383/1116/3934/27242/445/9076/8531/2633/6364/834/3576/1906/6422/6376/58191/965/10537/2634/837/9966/5743/330/8740/677/2950/3604/6347/7128/23198/6355/114769/3987/10673/4217/10010/9447/8792/678/5698/7132/7124/5771/27063/7412/6354/6352/90268/6362/8877/6351/10913/958/259230/6357/929/6868/1540/329/943/7133/6367/4049/10891/9020/55022/2150/3037/6369/8744/730249/4982/9705/5690/3735/970/2643/6375/7185/7114…
BP	GO:0050817	coagulation	225	0.265067	1.64263	0.00110742	0.011147	0.00739296	2850	tags=33%, list=23%, signal=26%	4067/2244/1906/2266/5912/966/84959/9060/5359/5329/5578/84830/710/6288/653145/5336/5873/10855/60/302/2627/5270/634/1608/5197/5588/2243/5295/3659/5156/81704/5055/5341/958/3569/3932/2316/3937/2150/2207/5265/10630/5579/2/725/10938/83706/114897/5890/5026/10627/5294/5328/308/2153/7409/5627/7414/8323/22953/2534/139818/23533/7454/6722/10461/5290/2769/959/8761/5028/10603/151/160851
BP	GO:0070661	leukocyte proliferation	225	0.507594	3.14559	0.00110742	0.011147	0.00739296	3998	tags=68%, list=32%, signal=47%	1051/27242/4478/4067/8440/79679/301/3570/6376/5621/7037/4690/57162/3620/8767/146433/3600/3958/26191/80380/8740/3574/3592/51083/2950/7128/4064/3718/6355/3965/53833/10673/3559/941/3553/3815/3133/100/5588/952/10457/3575/7412/11314/972/6352/3659/10288/4883/81704/64115/3606/29126/4860/942/1794/1880/10892/958/196/6664/3109/3569/6556/604/5788/11119/7133/3071/1493/1604/10859/1380/338376/3594/2150/8744/92…
BP	GO:0001655	urogenital system development	240	0.260138	1.62362	0.00110865	0.011147	0.00739296	2989	tags=33%, list=24%, signal=26%	8842/25937/157506/445/6715/8837/6422/301/3570/2296/4643/56913/3976/3371/6662/9420/5613/139285/5629/5268/1286/650/7475/3400/284/4851/5727/6608/4311/84159/10413/4953/2247/8549/6382/5156/7490/29927/6492/7474/7042/5915/6664/7046/79192/1285/2303/255738/8710/5324/5314/56603/3037/9510/2048/30812/2049/9245/3227/183/100133941/768239/6772/5800/10481/51196/655/9688/130497/3691/8829/27023/2297/654/3237/9104/…
CC	GO:0005788	endoplasmic reticulum lumen	218	0.322343	1.98384	0.00110865	0.011147	0.00739296	2271	tags=32%, list=18%, signal=27%	1356/1906/2266/1075/4240/56975/5329/7018/401138/3371/5743/3592/4052/10130/1286/5954/285203/7475/30001/84141/55214/4241/10232/10954/54507/79642/813/340348/79709/351/1299/2882/6696/2243/1622/3486/718/81029/567/7474/121506/81567/23071/153642/3569/5033/10970/416/1285/255738/340075/79188/5265/8542/493869/11096/1310/411/920/1302/1522/871/6383/85301/10525/9601/56886/2153/811/55033
BP	GO:0019058	viral life cycle	237	0.315864	1.97138	0.00110865	0.011147	0.00739296	3278	tags=40%, list=26%, signal=30%	3383/6590/9076/59272/1956/1525/9712/3576/7037/27074/5806/3428/1969/5359/8934/9397/6347/4057/5629/6355/5817/3965/7113/5371/4851/302/941/7913/4340/7124/7852/972/6352/3694/27350/858/3695/10663/50848/1803/942/23601/6732/89870/6317/1234/91543/1378/10107/8724/5818/79720/9475/1604/1380/3839/6504/5288/3356/85363/920/1508/30835/9474/4360/940/51193/2219/10475/200315/10410/26986/9688/11060/3688/286827/57379…
CC	GO:0030139	endocytic vesicle	223	0.315516	1.94824	0.00110865	0.011147	0.00739296	3327	tags=43%, list=27%, signal=32%	7097/5337/1956/10333/7096/7018/4643/8685/6288/306/23432/338382/4057/7475/3134/6891/5727/6608/4688/6890/154796/55647/3133/7791/817/3106/972/81029/50617/10981/567/8877/9332/7474/1803/3122/30011/7431/8724/6556/653361/1536/1493/3105/3123/8301/83547/10578/3920/752/8291/1755/51762/9367/3117/3482/10525/9474/23149/4689/8029/3113/5880/201475/50489/811/153090/8218/219972/51715/815/11151/2210/7454/3107/19/4…
BP	GO:0060070	canonical Wnt signaling pathway	216	0.282617	1.73803	0.00110865	0.011147	0.00739296	4141	tags=47%, list=33%, signal=32%	1001/25937/1956/6422/83439/2348/22943/8796/8326/7091/6662/51704/139285/6932/23198/6934/650/55612/4851/7088/5754/5698/79705/10413/59352/27185/80326/8549/144165/90268/81029/6382/7474/8324/25928/23189/26524/80114/1540/50964/8434/1749/6663/84870/79413/5690/374946/6259/219771/23072/27120/4040/5800/153090/5696/1601/85407/22881/8323/4286/340419/1482/6591/26585/2254/23240/284654/64750/2308/9096/5713/1159…
BP	GO:0002218	activation of innate immune response	231	0.444463	2.76383	0.00110988	0.011147	0.00739296	2305	tags=43%, list=19%, signal=36%	6280/7097/55765/3929/4067/6279/64581/2244/10333/57115/2266/7096/57162/118788/79931/3428/8767/94025/8685/26191/330/338382/1520/115004/7128/143662/5336/23198/4057/9258/3656/10010/9447/64127/6197/5698/5641/26253/64135/11314/80216/2243/90268/5063/3659/7321/3689/11213/23643/114771/64170/9641/5971/3662/338339/10892/93978/3654/89870/4584/91543/929/1540/200958/4585/329/1514/10392/92610/149628/2150/2207/6…
BP	GO:0006936	muscle contraction	236	0.257106	1.60399	0.00110988	0.011147	0.00739296	4485	tags=49%, list=36%, signal=32%	59272/5142/136/6769/1906/2023/342667/1756/5997/1410/1824/5743/23336/1907/6869/2982/79041/3815/57057/6641/100/7852/3759/952/817/5144/23676/6331/80005/274/8877/5724/23630/5318/4638/7431/60675/444/800/4604/2316/9475/5606/7111/92241/6261/80763/3356/8291/4606/80852/8082/183/9732/497189/10627/5294/9456/1131/7136/5608/51196/7414/22953/7139/1482/1829/72/476/6722/1136/2702/5290/1490/151/1832/23213/9631/37…
BP	GO:0007204	positive regulation of cytosolic calcium ion concentration	222	0.351466	2.17095	0.00110988	0.011147	0.00739296	3509	tags=50%, list=28%, signal=37%	133/4067/55503/7052/1906/6376/5621/59341/84959/1756/23007/2740/23566/6288/5336/1230/57158/30001/23075/1907/6869/5371/5031/79041/3627/2247/7852/952/817/5144/255231/5156/10663/2359/6263/2358/5737/9290/5734/2904/1234/3932/6373/60675/1394/5788/10563/1604/2150/6261/773/10518/1729/3356/887/920/4923/2841/356/183/4828/100133941/22821/9474/6375/114897/5026/9472/5294/4040/2357/1238/51554/553/84636/2829/511…
BP	GO:0031098	stress-activated protein kinase signaling cascade	215	0.354382	2.1794	0.00110988	0.011147	0.00739296	4059	tags=52%, list=33%, signal=35%	4281/55765/4067/136/1956/140885/10333/1906/6422/355/84451/59341/22943/8767/1852/1410/197259/26191/677/2950/6386/650/9258/3656/26525/3965/4217/2047/8792/64127/7164/3553/351/7124/5063/56940/8877/64170/7474/10913/4317/8324/7042/3654/6317/5734/29969/653361/1540/5606/10392/6504/9020/9448/2150/2213/7498/221472/3735/183/5911/389432/23118/153090/8600/5608/9770/22881/153769/1326/55801/11184/1236/959/1647/…
BP	GO:0032102	negative regulation of response to external stimulus	241	0.314715	1.96554	0.00110988	0.011147	0.00739296	2905	tags=38%, list=23%, signal=30%	116379/11240/140885/2244/1906/6376/2266/5465/84959/56963/5329/7850/2173/84830/710/6288/2950/6347/7128/135228/4057/9258/114769/53833/4851/302/113/3559/5270/4907/56833/634/2247/7132/100/284340/6696/5771/2243/90268/5156/2113/5055/7474/2358/11202/5734/64838/9021/4856/5788/10563/7133/199713/730249/2213/80763/84868/89790/7105/8530/6259/225/2841/223117/9723/114897/50943/5328/5800/10475/308/6091/5467/562…
MF	GO:0033218	amide binding	222	0.280644	1.73349	0.00110988	0.011147	0.00739296	3446	tags=40%, list=28%, signal=29%	7097/6715/25825/3929/10333/5621/2348/7096/81618/80339/2740/1410/8685/2950/8140/6646/3134/4311/25907/64127/4257/6890/3133/1515/321/10857/3106/972/1622/5295/5360/10288/3689/4883/1139/29927/3122/56922/2358/7042/2904/929/2346/1394/3839/3105/3123/8301/2048/773/2213/887/33/3684/3117/30835/2692/94026/3113/320/308/811/11015/100996758/2352/909/3107/11014/5479/5746/949/2043/3127/6753/3119/84134/9340/3115/2…
BP	GO:0034330	cell junction organization	215	0.277033	1.70371	0.00110988	0.011147	0.00739296	3014	tags=35%, list=24%, signal=27%	1001/9076/59272/1946/55765/1525/6422/3914/59341/7368/6281/2824/1969/23603/5578/64065/5962/3918/5796/6615/3801/60/5817/3987/3852/29841/22998/28513/87/7124/5317/6624/56940/50848/5318/10979/7042/5818/7046/2316/9475/11170/9448/2150/1828/3861/51762/183/865/23616/5800/60437/23705/1436/54751/7414/1829/3691/9647/6591/8829/10982/1010/6722/2702/81607/4323/57502/654/1832/2706/4771/51599/3915/25945
BP	GO:0051235	maintenance of location	241	0.295188	1.84358	0.00110988	0.011147	0.00739296	4079	tags=49%, list=33%, signal=33%	6280/3934/4067/6279/6376/158219/5465/84959/123/1756/23007/6278/4052/5336/22873/57158/30001/6646/5371/5031/79041/3627/5552/3553/2247/7124/57584/5771/817/5144/134429/25777/255231/718/9641/6263/4188/1234/3569/3932/2495/6373/5788/2316/7781/4794/11013/6261/1729/94033/3356/8291/920/4923/10938/356/84649/22821/9474/6375/7114/9472/308/811/11015/2760/5467/51196/55636/4283/286527/11124/11151/19/930/6622/110…
BP	GO:0060326	cell chemotaxis	236	0.474475	2.96007	0.00110988	0.011147	0.00739296	3120	tags=56%, list=25%, signal=42%	6280/4233/11240/6374/5142/3929/4067/2919/6279/6364/1525/3576/1906/301/3570/6376/58191/59341/30817/1969/2921/3958/8740/3592/6278/6288/2950/6347/9420/5293/6289/6372/1230/2920/23075/6355/26525/1907/3965/4851/2047/8792/3627/6291/56833/3553/3815/5641/2247/284340/5197/51411/7941/5588/7852/7412/5144/6354/972/6352/4015/3689/5156/151647/6362/3269/10663/6351/7474/1880/2358/7042/6357/1234/4363/3569/6373/686…
BP	GO:1903037	regulation of leukocyte cell-cell adhesion	236	0.528008	3.29404	0.00110988	0.011147	0.00739296	3057	tags=61%, list=25%, signal=47%	1051/3383/27242/445/4067/140885/8440/79679/301/3570/5621/7037/864/4690/57162/5465/3620/8767/8876/3600/3958/26191/80380/7525/8740/3574/3592/84830/6347/8808/2267/3718/8651/3965/53833/10673/3559/64127/941/9308/3553/634/3133/7124/100/5588/10457/5771/3575/7412/11314/29851/972/6352/5295/5063/3659/201633/10288/3689/81704/2113/56940/64115/3606/29126/4860/1803/942/5724/3566/10892/3654/3109/3569/3932/961/6…
BP	GO:0002758	innate immune response-activating signal transduction	217	0.443431	2.72503	0.00111111	0.011147	0.00739296	2305	tags=43%, list=19%, signal=36%	6280/7097/55765/3929/4067/6279/64581/2244/10333/57115/2266/7096/57162/118788/79931/8767/94025/8685/26191/330/338382/1520/7128/143662/5336/23198/4057/9258/3656/10010/64127/6197/5698/5641/26253/64135/11314/80216/2243/90268/5063/3659/7321/3689/11213/23643/114771/64170/9641/5971/3662/338339/10892/93978/3654/89870/4584/91543/929/1540/200958/4585/329/1514/10392/92610/2150/2207/6271/51311/730249/2672/71…
BP	GO:1901342	regulation of vasculature development	217	0.3791	2.32969	0.00111111	0.011147	0.00739296	3553	tags=49%, list=29%, signal=35%	6648/1116/133/8837/3576/9982/6422/301/3570/6376/1545/2296/1969/7101/3696/3091/5578/5743/306/7128/51129/7453/5371/4851/2627/3627/3553/634/154796/3815/694/2247/7852/10457/54583/718/3689/2113/10000/7490/8877/1139/7474/958/7042/3569/27161/1536/60675/8434/9475/10563/1285/140862/2303/8710/6774/6271/6369/5579/3552/7498/5230/3687/356/183/9723/10253/6772/51330/153090/655/729230/5315/56999/28984/1942/8829/…
BP	GO:0001666	response to hypoxia	232	0.312683	1.94281	0.00111359	0.011147	0.00739296	1761	tags=28%, list=14%, signal=25%	3383/133/7097/8837/1906/6422/2023/5465/768/1410/54541/5352/3091/5743/677/824/51129/23198/650/30001/114769/112399/5371/5351/4851/2627/6285/5163/5698/27087/100/7852/952/6649/27063/7412/5562/54583/10397/2034/2113/3939/5066/114990/1139/1803/7042/3654/57103/9124/6868/1536/1394/79723/9475/329/571/4049/205/10891/3776/3779/6326/6261/5690/5230
BP	GO:0009615	response to virus	232	0.383199	2.38095	0.00111359	0.011147	0.00739296	3213	tags=47%, list=26%, signal=35%	3934/3459/2633/3455/2023/3428/1021/5359/3600/54541/10577/330/3592/10346/115004/7128/146857/91607/201294/8061/4321/6355/3965/5371/84166/9447/3559/3627/3553/6502/3588/4953/7124/7852/3460/5551/10625/64135/6352/25939/27350/3659/55509/64108/11213/64170/50506/6351/9641/2268/958/89870/4600/10561/91543/3569/10622/5788/2316/329/6367/10859/9020/338376/3594/2150/51311/10964/3433/1755/7105/85363/149233/3159/…
BP	GO:0032956	regulation of actin cytoskeleton organization	232	0.264566	1.64384	0.00111359	0.011147	0.00739296	2948	tags=34%, list=24%, signal=27%	3383/4233/1946/8440/1906/6422/6376/4690/6281/2824/5962/23406/5629/11135/23075/10096/22998/390/5295/5063/10602/5156/6624/274/5066/5341/50848/10095/23189/10092/5734/79822/7046/961/2316/9475/3071/55971/11170/7111/3984/2150/11013/6369/57822/683/3055/91807/285590/55704/9723/23433/7114/4853/23616/171177/64857/10109/119/1436/120/286527/348110/54509/11151/3059/6712/7454/9647/28984/6710/8829/10097/8477/12…
CC	GO:0034774	secretory granule lumen	232	0.348903	2.16786	0.00111359	0.011147	0.00739296	4095	tags=52%, list=33%, signal=36%	1116/6280/3934/6590/11240/5005/2919/6279/5004/2244/2266/5806/1075/7018/6282/10577/710/6278/2950/10562/1476/4057/6386/23406/201294/5873/10855/302/5552/87/1265/351/671/51411/2243/718/567/2268/4860/126014/3101/1794/4317/81567/7042/10092/6317/23071/2171/51316/10549/4069/6283/8566/5265/8836/2/240/3608/411/1522/83706/4332/7114/64333/25801/2219/51571/2153/1509/2760/10487/2992/1521/2352/5627/7414/5315/10…
CC	GO:0030667	secretory granule membrane	221	0.377095	2.322	0.00111483	0.011147	0.00739296	3691	tags=54%, list=30%, signal=39%	7097/5337/140885/23200/5912/966/27074/965/6518/5329/8876/3958/5284/11010/135228/976/10257/222487/154664/53831/5873/4311/4257/634/11025/10184/26002/150372/5317/952/9749/11314/10857/858/963/10288/3689/8560/5066/23250/23601/5724/338339/2358/3903/1378/929/2171/6556/961/89777/2204/1536/10970/5788/199675/7133/3071/1604/10326/968/2207/6515/79895/1828/1729/3920/683/1755/170482/3684/3687/64114/353189/1823…
BP	GO:0032103	positive regulation of response to external stimulus	235	0.439526	2.73398	0.00111483	0.011147	0.00739296	3549	tags=54%, list=29%, signal=39%	1051/6280/9180/4233/7097/3929/6279/136/1956/64581/10333/7052/3576/1906/3570/6376/59341/1075/3620/8767/3600/5578/5743/8740/3592/6278/51704/4064/1230/23075/115362/1907/3965/10133/8792/353514/3627/64127/3553/5641/2247/7132/3133/7124/284340/7941/7852/5650/6354/972/6352/718/6362/2113/23643/3606/6351/25818/7474/4317/2358/5008/89870/5734/4363/3569/961/6868/145741/10563/3071/4049/10392/6283/2150/2207/636…
BP	GO:0071902	positive regulation of protein serine/threonine kinase activity	235	0.295029	1.83517	0.00111483	0.011147	0.00739296	4593	tags=53%, list=37%, signal=34%	55765/136/1956/10333/1906/84451/54757/22943/8767/1852/197259/23566/6288/151195/4057/5629/650/3656/4217/9294/8792/64127/7164/3553/3815/238/2247/7124/284340/7852/5562/972/5063/1139/7474/1849/958/3654/7046/29969/6868/60675/5788/200958/3084/2180/5606/10392/9020/6283/255324/3356/221472/219771/7039/3735/100133941/10253/3458/389432/5294/23118/2357/153090/6091/8600/5608/6997/51196/1436/23533/1326/28984/6…
BP	GO:1901214	regulation of neuron death	221	0.278495	1.71486	0.00111483	0.011147	0.00739296	4120	tags=48%, list=33%, signal=33%	135112/6648/1051/10333/8564/6376/5621/22800/5465/22943/8326/54541/8934/3091/824/6347/284/2019/57707/112399/8200/3134/5457/7159/4217/2047/5641/23321/7124/10457/26291/6352/4170/5063/3689/128434/1139/7474/7042/57103/2904/1394/7133/255738/10891/3812/6774/94234/8301/2213/55532/4909/374946/3684/1522/5803/356/10525/9928/3458/8882/867/2534/8013/1435/11151/131450/8829/6622/5290/27023/472/728/6348/3586/109…
BP	GO:0043405	regulation of MAP kinase activity	234	0.318179	1.97741	0.00111607	0.011147	0.00739296	3593	tags=44%, list=29%, signal=32%	55765/4067/136/1956/10333/1906/6422/84451/22943/8767/1852/5997/197259/26191/23566/6288/2950/650/10251/3656/11329/4217/9294/8792/64127/7164/3553/3815/238/2247/7124/284340/7852/11314/5562/972/5063/11213/1139/7474/1849/958/3654/6317/7046/29969/60675/5788/200958/3084/5606/10392/9020/6283/255324/54900/7345/2048/3356/221472/7039/3735/28951/100133941/10253/389432/5294/23118/2357/153090/6091/8600/5608/69…
CC	GO:0098589	membrane region	234	0.398335	2.47556	0.00111607	0.011147	0.00739296	4224	tags=61%, list=34%, signal=41%	3383/59272/1946/7097/8837/4067/1956/1525/10333/7851/355/5621/5912/7096/6281/2824/1756/5359/23603/5743/330/79054/6530/84830/824/6386/284/10855/9289/2047/302/5727/6608/4311/7804/351/7132/7124/858/6331/3689/1139/1803/108/4118/10666/11252/929/3932/7046/6868/54742/5788/329/3937/7133/1604/3037/10630/3635/3920/914/3356/8291/3055/5230/3684/962/920/2770/4923/871/356/23299/100133941/483/23433/695/9472/4040…
BP	GO:0070371	ERK1 and ERK2 cascade	214	0.434155	2.66121	0.00111732	0.011147	0.00739296	2880	tags=48%, list=23%, signal=38%	3383/1116/8837/4067/2633/6364/1956/140885/2244/6376/2266/59341/152007/8767/1969/8685/3976/26191/5578/6662/6278/677/2950/6347/2651/650/1230/9258/284/6355/3965/5031/4851/2047/338761/8792/285016/678/64127/3553/634/3815/351/2247/7124/10457/26291/5771/6354/467/2243/972/6352/5156/6362/1139/6351/1880/2358/9290/6357/5734/6098/5788/6367/10392/6504/5314/2150/195827/6369/2048/3356/55532/84868/388325/57447/9…
BP	GO:1902105	regulation of leukocyte differentiation	214	0.434348	2.66239	0.00111732	0.011147	0.00739296	3530	tags=56%, list=28%, signal=41%	1051/4067/57115/6422/301/864/84959/8767/1021/146433/8876/3600/3976/5578/3574/3592/677/133522/8808/4057/1230/286410/3718/8651/3965/5457/3559/678/941/9308/56833/634/11025/7124/150372/100/9760/5771/3575/972/5295/3659/10288/64115/114771/3606/4860/942/3662/3566/10892/9290/1378/604/1540/5788/3071/1493/10859/11006/3594/56603/639/8744/3149/28959/2213/3635/133308/914/54440/920/149233/55365/3902/30009/865/…
BP	GO:0046651	lymphocyte proliferation	207	0.502202	3.05664	0.00112108	0.011147	0.00739296	3998	tags=69%, list=32%, signal=47%	1051/27242/4478/4067/8440/79679/301/3570/5621/7037/4690/57162/3620/8767/3600/3958/26191/80380/8740/3574/3592/51083/4064/3718/3965/53833/10673/3559/941/3553/3133/100/5588/952/10457/3575/7412/11314/972/6352/3659/10288/81704/64115/3606/29126/4860/942/1794/1880/10892/958/196/6664/3109/3569/6556/604/5788/11119/7133/3071/1493/1604/10859/1380/338376/3594/8744/923/2213/3635/683/84868/54440/920/149233/400…
BP	GO:0071356	cellular response to tumor necrosis factor	207	0.407863	2.48245	0.00112108	0.011147	0.00739296	2305	tags=39%, list=19%, signal=32%	3383/1116/3934/27242/445/9076/8531/2633/6364/834/3576/1906/6422/6376/965/2634/837/9966/330/8740/677/2950/3604/6347/7128/23198/6355/114769/3987/10673/4217/10010/9447/8792/678/5698/7132/7124/5771/27063/7412/6354/6352/90268/6362/8877/6351/10913/958/259230/6357/6868/1540/329/943/7133/6367/4049/10891/9020/55022/2150/3037/6369/8744/730249/4982/9705/5690/3735/970/6375/7185/7114/6772/51330/6846/153090/86…
BP	GO:0009913	epidermal cell differentiation	212	0.323832	1.97752	0.0011236	0.011147	0.00739296	3128	tags=39%, list=25%, signal=29%	1001/25984/3868/5266/301/2296/3855/1969/23581/8796/3854/3887/3853/1824/9333/64065/6278/677/1825/6768/643414/135228/1830/3872/286887/3866/125115/3852/29841/4851/5727/3857/64919/9119/2069/10413/5493/1515/5080/5317/25932/117531/3851/4610/25818/1475/7474/5318/3889/60485/7051/9475/1514/56603/1828/3861/390792/3713/196374/730755/1823/3849/865/10083/81851/9750/1829/83895/26085/5308/1832/3885/100505753/30…
BP	GO:0051251	positive regulation of lymphocyte activation	212	0.478515	2.92211	0.0011236	0.011147	0.00739296	3458	tags=60%, list=28%, signal=44%	4067/64581/140885/8440/79679/301/3570/7037/864/4690/57162/8767/8876/3600/80380/7525/8740/3574/3592/6347/8808/286410/3718/8651/3965/10673/3134/3559/64127/941/9308/3553/3133/100/5588/9760/952/3575/7412/29851/972/6352/5295/5063/10288/81704/64115/3606/29126/4860/1803/942/1880/3566/10892/958/3109/3569/3932/961/604/1540/5788/3071/1493/1604/10859/10326/11006/3594/8744/923/9402/3635/683/55423/84868/54440…
MF	GO:0005126	cytokine receptor binding	210	0.414222	2.52815	0.00112486	0.011147	0.00739296	4171	tags=59%, list=34%, signal=40%	1946/6374/8837/2919/6364/3556/3576/3570/6376/1672/58191/146433/9966/2921/3600/3976/8740/3574/3592/6347/6386/6372/650/2920/6355/26525/8200/10673/3627/3553/7124/5197/637/6354/6352/651/5295/29097/6362/3606/6351/7042/5008/6357/3569/7046/6373/6868/10563/6367/4049/338376/6774/3594/6369/8744/7100/3552/149233/64114/1437/356/970/6375/7185/8743/3458/6772/6846/4615/153090/8600/4283/655/729230/1435/440712/26…
BP	GO:0022409	positive regulation of cell-cell adhesion	210	0.508191	3.10168	0.00112486	0.011147	0.00739296	3267	tags=61%, list=26%, signal=46%	3383/4067/140885/2244/8440/79679/301/4651/3570/6376/2266/7037/864/4690/8767/8876/3600/80380/7525/8740/3574/3592/6347/8808/2651/3718/8651/3965/10673/3559/64127/941/9308/3553/3133/7124/100/5588/3575/7412/29851/2243/972/6352/5295/5063/10288/3689/81704/8728/2113/64115/3606/29126/7474/4860/1803/942/5724/3566/10892/3654/3109/3569/3932/961/604/1540/5788/10563/3071/1493/1604/10859/10326/11006/3594/3037/8…
BP	GO:0032943	mononuclear cell proliferation	208	0.503097	3.06319	0.00112613	0.011147	0.00739296	3998	tags=69%, list=32%, signal=47%	1051/27242/4478/4067/8440/79679/301/3570/5621/7037/4690/57162/3620/8767/3600/3958/26191/80380/8740/3574/3592/51083/4064/3718/3965/53833/10673/3559/941/3553/3133/100/5588/952/10457/3575/7412/11314/972/6352/3659/10288/81704/64115/3606/29126/4860/942/1794/1880/10892/958/196/6664/3109/3569/6556/604/5788/11119/7133/3071/1493/1604/10859/1380/338376/3594/8744/923/2213/3635/683/84868/54440/920/149233/400…
BP	GO:0002460	adaptive immune response based on somatic recombination of immune receptors built from immunoglobulin superfamily domains	204	0.502007	3.04757	0.0011274	0.011147	0.00739296	4006	tags=69%, list=32%, signal=47%	3383/722/715/154064/301/3570/716/7037/79465/1075/8767/3426/3592/80328/710/7128/80329/3718/201294/23075/353091/5873/5817/10068/53833/200558/10673/3134/8809/51279/941/3553/634/3133/7124/100/5452/5588/5551/10384/3575/3106/9466/972/718/135250/717/567/56940/3606/29126/5971/8807/3662/3566/10892/958/10666/91543/1378/3569/6556/3554/604/84174/6868/5788/10563/7133/1604/10859/1380/4049/3105/6774/3594/2207/5…
BP	GO:0006909	phagocytosis	209	0.433234	2.64002	0.0011274	0.011147	0.00739296	4070	tags=61%, list=33%, signal=42%	4233/7097/3929/4067/722/64581/140885/7052/301/4651/4690/3601/5806/4240/23603/3600/7087/8685/7525/306/338382/6347/5336/201294/5873/60/10096/5031/4688/3553/55647/7124/51411/11314/5295/718/3689/3561/717/151647/8877/2268/10095/1794/2358/81567/10092/8724/929/6556/961/5788/3071/10326/6504/7456/3984/2150/2207/3394/9844/2213/8291/55423/3055/9938/3684/919/917/725/9474/4689/3458/23616/2219/4615/3560/811/10…
MF	GO:0001664	G protein-coupled receptor binding	203	0.359371	2.17699	0.0011325	0.011147	0.00739296	2906	tags=41%, list=23%, signal=32%	133/6374/2919/6364/3576/1906/6422/6376/1672/5621/58191/2921/8685/51083/6288/51704/6347/6386/6372/2920/7475/6355/1907/57561/84152/5727/9294/3640/3627/5197/112609/80326/5144/6354/6352/718/81029/64108/29097/6362/6351/7474/8324/6357/6373/60675/2316/10563/6367/6774/6369/7345/84870/887/636/6259/2770/183/4828/9454/6375/6772/83597/2219/4040/9456/2357/6846/7289/4283/729230/2534/340419/3691/2774/5368/34714…
BP	GO:0001818	negative regulation of cytokine production	203	0.435912	2.64066	0.0011325	0.011147	0.00739296	2651	tags=47%, list=21%, signal=37%	1001/27242/3929/2633/5004/140885/10333/57115/9111/301/6376/5621/3620/1969/7850/26191/80380/3592/2950/7128/4057/3718/284/26525/114769/3965/53833/3134/5371/113/2627/84166/353514/9308/5552/634/671/7124/10457/64135/9466/201633/440068/11213/64115/114771/29126/1139/9641/5971/4317/7042/5734/3569/6556/604/10225/1540/5788/3071/199713/10859/6504/2150/51311/730249/2213/3635/84868/57447/149233/225/2841/28951…
BP	GO:0090130	tissue migration	203	0.349605	2.11783	0.0011325	0.011147	0.00739296	3651	tags=47%, list=29%, signal=34%	4233/3868/1906/9982/301/1545/152007/1969/23603/7101/3091/5578/5743/6662/84830/306/5613/5629/284/55612/4851/6273/3640/634/154796/3815/5641/2247/5646/340719/2196/80005/3689/2113/116150/10000/8828/7474/1803/958/7042/23189/7046/6868/4856/9475/10563/2303/5606/9448/3037/411/183/3849/2252/7114/3458/154810/23616/811/153090/6091/6997/5467/54443/56999/9647/72/28984/1942/8829/3688/10982/6722/26585/5290/1839…
BP	GO:0002793	positive regulation of peptide secretion	202	0.327432	1.98205	0.00113507	0.011147	0.00739296	2615	tags=37%, list=21%, signal=30%	7097/5005/3459/6279/1956/5004/2244/834/3556/79679/2266/7096/59341/3783/965/8767/26191/3091/6288/6934/55612/4321/3965/9447/353514/64127/3553/7447/5208/3133/7124/26253/952/64135/27063/2243/29126/2268/7474/23601/4317/3566/7042/93978/5008/5734/929/3569/24145/199713/51744/2150/51311/2597/3552/914/84868/51762/3735/5047/23765/2692/3458/2219/23705/8600/5019/5467/3651/1436/55801/28984/56253/114548/945
BP	GO:0070372	regulation of ERK1 and ERK2 cascade	202	0.435448	2.63591	0.00113507	0.011147	0.00739296	2880	tags=49%, list=23%, signal=38%	3383/1116/8837/4067/2633/6364/1956/140885/2244/6376/2266/59341/152007/8767/1969/8685/3976/26191/5578/6278/2950/6347/2651/650/1230/9258/284/6355/3965/5031/4851/2047/338761/8792/285016/64127/3553/634/3815/351/2247/7124/10457/26291/5771/6354/467/2243/972/6352/5156/6362/1139/6351/1880/2358/9290/6357/6098/5788/6367/10392/6504/5314/2150/195827/6369/2048/3356/55532/84868/388325/57447/920/389658/81610/37…
MF	GO:0042277	peptide binding	187	0.299382	1.79514	0.00113636	0.011147	0.00739296	3446	tags=41%, list=28%, signal=30%	7097/25825/3929/10333/5621/7096/81618/2740/1410/8685/2950/8140/3134/4311/25907/64127/4257/6890/3133/1515/321/10857/3106/972/5295/10288/3689/4883/1139/29927/3122/2358/7042/2904/929/2346/1394/3839/3105/3123/8301/2048/773/2213/887/3684/3117/30835/2692/94026/3113/320/308/811/11015/100996758/909/3107/11014/5479/5746/949/2043/3127/6753/3119/84134/9340/3115/2903/5480/5534/90/712/2831/7099/3135
BP	GO:0043406	positive regulation of MAP kinase activity	187	0.313366	1.87899	0.00113636	0.011147	0.00739296	4180	tags=50%, list=34%, signal=34%	55765/136/1956/10333/1906/84451/22943/8767/1852/197259/23566/6288/650/3656/4217/9294/8792/64127/7164/3553/3815/238/2247/7124/284340/7852/5562/972/5063/1139/7474/1849/958/3654/7046/29969/60675/5788/200958/3084/5606/10392/9020/6283/255324/3356/221472/7039/3735/100133941/389432/5294/23118/2357/153090/6091/8600/5608/6997/51196/23533/1326/11184/959/1647/151/728/2043/101/2688/57216/5610/84962/6233/2304…
BP	GO:0030217	T cell differentiation	192	0.458324	2.75761	0.00113766	0.011147	0.00739296	3017	tags=56%, list=24%, signal=43%	301/864/8767/1021/8876/3600/26191/3574/3592/677/8808/5293/6932/3718/8651/3965/8809/3559/678/941/9308/64919/3815/100/26253/5771/3575/972/3659/10288/567/64115/3606/4860/942/5971/3662/1794/1880/3566/338339/8324/10892/5734/91543/1378/3569/3932/604/6868/1540/5788/3071/1493/11006/6774/3594/2207/56603/639/8744/3702/114836/914/54440/920/149233/917/2841/6693/915/9474/3902/30009/916/159296/865/940/3458/509…
MF	GO:0030246	carbohydrate binding	191	0.324664	1.95261	0.00113766	0.011147	0.00739296	4190	tags=52%, list=34%, signal=35%	1116/1117/64581/5214/140578/7360/5806/4065/6518/3958/5352/202/55214/79695/64129/157869/3965/112399/5351/131544/2591/26253/2590/80216/54583/6675/5066/3824/648791/23601/3101/3122/338339/93978/51435/5818/5033/59271/6515/3123/282969/374378/9976/3821/971/89790/170482/3482/30835/4360/50856/89858/2219/50489/811/80201/27180/2646/6402/6614/969/100431172/3957/27036/29094/5836/945/56261/79623/160364/433/229…
BP	GO:0042063	gliogenesis	201	0.352072	2.1293	0.00113766	0.011147	0.00739296	2896	tags=39%, list=23%, signal=31%	27242/7097/25825/4067/3459/6279/57211/1956/301/6376/26227/1021/146433/7101/3976/6662/2950/9334/6347/55553/4781/650/3400/2119/9289/4851/85414/6608/5270/6285/400746/3553/79628/351/7124/4664/4919/5080/7852/27185/25777/1128/10397/274/92737/1880/2358/7042/7431/6664/3569/3084/7133/6663/4049/5324/6774/4147/30812/3418/745/5803/2250/3458/10810/153090/1436/729230/1435/3766/56978/4323/5028/26228/728/6348/20…
BP	GO:0050714	positive regulation of protein secretion	192	0.324978	1.9553	0.00113766	0.011147	0.00739296	2615	tags=37%, list=21%, signal=30%	7097/5005/3459/1956/5004/2244/834/3556/79679/2266/7096/59341/3783/965/8767/26191/3091/6288/6934/55612/4321/3965/9447/353514/64127/3553/7447/5208/3133/7124/26253/952/64135/27063/2243/29126/2268/7474/23601/4317/3566/7042/93978/5008/5734/929/3569/24145/199713/51744/2150/51311/2597/3552/914/84868/3735/5047/23765/3458/2219/23705/5019/5467/3651/1436/55801/28984/56253/114548/945
BP	GO:0061448	connective tissue development	192	0.332503	2.00058	0.00113766	0.011147	0.00739296	3941	tags=48%, list=32%, signal=34%	1116/8837/1906/3570/64764/864/59341/3696/3091/50515/6662/55553/139285/4781/650/6615/3400/8200/57561/4851/302/2734/84159/2247/25884/7045/55790/651/4015/81029/7490/7474/144347/51435/5915/7046/4856/2303/10891/8710/4147/4256/30812/285590/3200/2202/1302/871/5307/84649/85301/4040/6474/5019/5467/655/340419/1435/130497/6591/6722/26585/5290/860/656/2297/89766/2254/654/1490/3491/23213/4094/389084/8609/8785…
BP	GO:0072593	reactive oxygen species metabolic process	192	0.311312	1.87308	0.00113766	0.011147	0.00739296	4120	tags=51%, list=33%, signal=35%	6648/3383/445/59272/7097/55765/8837/1956/64581/140885/10333/1906/1545/5806/9263/1410/54541/3091/5743/2950/5873/4688/3553/4025/8838/7124/10516/6649/3689/90527/151647/50506/4317/2358/57103/961/653361/1536/9475/329/10549/55022/6774/4314/2150/730249/683/7498/55532/285590/3684/225/183/9474/2643/4689/3458/5880/7409/655/2534/5740/6622/4353/405753/1647/1490/9104/3491/3586/2308/22914/199/5165/4780/384/375…
BP	GO:0007162	negative regulation of cell adhesion	195	0.459167	2.77156	0.00113895	0.011147	0.00739296	2905	tags=50%, list=23%, signal=39%	1051/27242/445/1946/2633/79679/301/6376/5621/2266/864/1545/59341/57162/5465/84959/3620/23603/3958/26191/80380/3371/5962/84830/9404/2267/2651/650/3718/284/23075/8651/4321/4241/53827/3965/53833/4851/3559/5270/941/634/10457/5771/7045/11314/972/5295/3659/201633/10288/56940/64115/29126/5361/942/3566/8324/23189/27299/604/5788/1493/10859/11170/9448/54900/2213/84868/6693/9723/3902/30009/865/6375/114897/5…
BP	GO:0007249	I-kappaB kinase/NF-kappaB signaling	195	0.402791	2.43127	0.00113895	0.011147	0.00739296	2267	tags=41%, list=18%, signal=34%	7097/55765/8837/140885/10333/834/7052/6376/57162/79931/8767/10537/330/2950/10346/51704/7128/9516/4057/284/3656/26525/114769/3965/10133/10010/7088/6285/64127/10783/3553/7132/7124/4919/51026/80216/972/23643/64170/9641/7474/10913/5971/10892/958/93978/3654/6275/929/2316/8795/9475/329/10549/6398/10392/92610/9020/6283/2150/51311/5579/7105/85363/920/356/10758/497189/27032/8743/6772/843/695/23118/10475/4…
BP	GO:0010631	epithelial cell migration	198	0.351951	2.12733	0.00113895	0.011147	0.00739296	3651	tags=47%, list=29%, signal=34%	4233/3868/1906/9982/301/1545/152007/1969/23603/7101/3091/5578/5743/6662/84830/306/5613/5629/284/55612/4851/6273/3640/634/154796/3815/5641/2247/5646/340719/2196/80005/3689/2113/116150/10000/8828/7474/1803/958/7042/23189/7046/6868/4856/9475/10563/2303/5606/9448/3037/411/183/3849/2252/7114/3458/154810/23616/811/153090/6091/6997/5467/54443/56999/9647/28984/1942/8829/3688/10982/6722/26585/5290/1839/20…
BP	GO:0016485	protein processing	193	0.34763	2.09128	0.00113895	0.011147	0.00739296	2704	tags=37%, list=22%, signal=29%	59272/25825/722/2244/834/715/2023/5621/716/2266/966/9508/3428/8767/7850/3426/330/64065/710/1520/824/5653/8492/4241/114769/7113/302/51279/5727/4311/5270/2734/5552/3553/5641/2619/5646/2243/718/717/3816/64115/9532/1379/1378/444/329/1604/199713/1380/255738/5230/2/8530/26160/9718/725/745/1522/84909/11326/5328/79094/732/5627/9159/5992/930/119587/26085/4323
BP	GO:0045165	cell fate commitment	195	0.319184	1.92661	0.00113895	0.011147	0.00739296	2450	tags=35%, list=20%, signal=29%	1051/6422/22943/2001/7101/6662/3574/3475/9095/55553/6934/5629/650/7475/8543/5460/5371/5457/4851/5727/6608/2627/30012/56833/2114/64919/57057/2247/2619/5080/80326/4170/81029/2034/7490/7474/3662/8324/25928/89870/64843/3569/7046/63950/1540/3084/2303/6774/3594/56603/639/10630/114836/4909/30812/285590/149233/6693/5307/100170841/30009/10253/4853/50943/4063/8320/3226/4286/1482
BP	GO:0090132	epithelium migration	198	0.351951	2.12733	0.00113895	0.011147	0.00739296	3651	tags=47%, list=29%, signal=34%	4233/3868/1906/9982/301/1545/152007/1969/23603/7101/3091/5578/5743/6662/84830/306/5613/5629/284/55612/4851/6273/3640/634/154796/3815/5641/2247/5646/340719/2196/80005/3689/2113/116150/10000/8828/7474/1803/958/7042/23189/7046/6868/4856/9475/10563/2303/5606/9448/3037/411/183/3849/2252/7114/3458/154810/23616/811/153090/6091/6997/5467/54443/56999/9647/28984/1942/8829/3688/10982/6722/26585/5290/1839/20…
BP	GO:0010951	negative regulation of endopeptidase activity	175	0.300786	1.78684	0.00114025	0.011147	0.00739296	1791	tags=27%, list=14%, signal=24%	5918/6590/8837/5266/144568/27074/3428/5329/1410/5743/728113/330/8740/25816/710/27151/1476/653145/5271/135228/4057/5268/114769/26998/5270/6318/6197/351/5272/718/440068/274/5055/9806/1475/6317/1378/89777/8434/329/1285/199713/8710/5265/8301/2597/2/8530
BP	GO:0030216	keratinocyte differentiation	176	0.382556	2.27686	0.00114025	0.011147	0.00739296	1957	tags=34%, list=16%, signal=29%	1001/25984/3868/5266/301/2296/3855/1969/23581/8796/3854/3887/3853/1824/9333/64065/6278/677/1825/6768/643414/135228/1830/3872/286887/3866/125115/3852/29841/4851/3857/64919/9119/2069/10413/5493/1515/5080/5317/25932/3851/25818/1475/7474/5318/3889/60485/7051/9475/1514/56603/1828/3861/390792/3713/196374/730755/1823/3849
BP	GO:0045765	regulation of angiogenesis	194	0.378057	2.27745	0.00114025	0.011147	0.00739296	3553	tags=49%, list=29%, signal=36%	1116/133/3576/9982/6422/301/6376/1545/2296/1969/7101/3696/3091/5578/5743/306/7128/51129/7453/5371/4851/2627/3627/3553/634/154796/694/2247/7852/10457/54583/718/3689/2113/10000/8877/1139/7474/958/7042/3569/27161/1536/60675/8434/9475/10563/1285/140862/2303/6774/6271/6369/5579/3552/5230/3687/356/183/9723/10253/6772/51330/153090/729230/5315/56999/28984/1942/8829/3688/5740/126259/79805/728/23670/3586/5…
BP	GO:0051403	stress-activated MAPK cascade	194	0.373294	2.24875	0.00114025	0.011147	0.00739296	4059	tags=54%, list=33%, signal=37%	4281/55765/136/1956/140885/10333/1906/6422/355/84451/59341/22943/8767/1852/1410/197259/26191/677/2950/6386/650/9258/3656/26525/3965/4217/2047/8792/64127/7164/3553/351/7124/56940/8877/64170/7474/10913/4317/8324/7042/3654/6317/5734/29969/653361/1540/5606/10392/6504/9448/2150/2213/7498/221472/3735/183/5911/389432/23118/153090/8600/9770/22881/153769/1326/55801/11184/1236/959/1647/1490/2043/344558/230…
BP	GO:0070663	regulation of leukocyte proliferation	175	0.52361	3.11054	0.00114025	0.011147	0.00739296	3998	tags=71%, list=32%, signal=49%	1051/27242/4067/8440/79679/301/3570/5621/7037/4690/57162/3620/8767/3600/3958/26191/80380/3574/3592/51083/2950/7128/3718/6355/3965/53833/10673/3559/941/3553/3133/100/5588/952/10457/7412/11314/972/6352/3659/10288/64115/3606/29126/4860/942/1880/958/196/6664/3109/3569/604/5788/7133/3071/1493/1604/10859/3594/8744/923/2213/3635/683/84868/54440/920/149233/4004/30835/6693/970/100133941/916/6375/4332/940/…
BP	GO:0030100	regulation of endocytosis	197	0.296443	1.78785	0.00114155	0.011147	0.00739296	2882	tags=36%, list=23%, signal=28%	7097/722/64581/140885/3601/5806/4240/22943/7018/3600/3958/6347/5336/6386/8898/284/5873/302/3553/55647/7124/11314/718/3561/717/274/567/8877/11037/2268/7474/1794/2358/11252/8724/929/6556/961/5788/3071/10859/10326/255738/2150/2207/8301/2213/8291/55423/3055/636/725/9474/3458/3560/811/9892/867/1601/64422/6457/57118/6622/10461/26585/26228/949/79772/22848/3077/284654
BP	GO:0050730	regulation of peptidyl-tyrosine phosphorylation	189	0.386798	2.32049	0.00114155	0.011147	0.00739296	3503	tags=50%, list=28%, signal=37%	3383/116379/1946/4067/1956/8440/6422/3570/5621/5912/8767/3600/3976/7525/3574/3592/51704/284/8651/285016/353514/941/7804/3815/79705/2069/351/7132/7124/5771/11314/972/6352/3689/56940/3606/958/5008/3569/9021/653361/6868/5788/3084/255324/6774/683/3356/920/149233/389658/7039/1437/183/100133941/2252/916/3458/54625/64092/6997/1436/867/2534/3059/1942/8829/55024/57091/6690/26585/1443/1839/654/26228/10507/…
BP	GO:0098656	anion transmembrane transport	197	0.291877	1.76031	0.00114155	0.011147	0.00739296	3595	tags=42%, list=29%, signal=30%	11254/1183/2564/117247/5621/2348/2568/115019/5997/366/57348/80727/8140/10479/83959/6566/6557/6511/84561/25932/10991/56172/55879/1184/8884/120103/5724/22802/9194/9635/6507/92745/4363/9056/84912/84230/206358/10630/8542/1836/123041/124935/115111/4923/6534/183/389015/55117/6536/9123/10165/51660/84679/81034/3766/23507/130497/19/57419/9057/5172/55248/2558/285195/55144/144453/1193/5565/1080/7809/83733/2…
BP	GO:0051091	positive regulation of DNA-binding transcription factor activity	185	0.381008	2.27517	0.00114286	0.011147	0.00739296	3755	tags=52%, list=30%, signal=37%	3383/6280/7097/8837/266977/6279/10333/3556/1906/6376/8767/54101/133522/306/338382/10346/4057/8061/3656/114769/3965/8809/6608/9447/8792/64127/3553/7804/3815/84159/238/351/7124/150372/4919/5588/3689/11213/8877/3606/7474/8807/4921/10892/958/3654/89870/3569/60485/10392/10891/6283/6774/5579/58484/85363/183/7185/695/4040/23118/10475/4615/4791/8600/815/3059/28984/57118/114548/6722/959/84433/3586/57121/1…
BP	GO:0002449	lymphocyte mediated immunity	199	0.484797	2.92628	0.00114416	0.011147	0.00739296	4006	tags=67%, list=32%, signal=46%	3383/722/715/154064/716/7037/79465/1075/3426/3592/80328/710/80329/201294/23075/353091/5873/5817/3965/53833/200558/3134/8809/51279/6318/3553/634/3002/5272/3133/7124/5452/5551/10384/3575/3106/9466/972/718/135250/717/567/56940/3606/3824/8807/3566/10892/958/10666/91543/1378/3569/6556/3554/604/84174/10225/5788/7133/1604/10859/1380/3805/4049/3105/3594/2207/51311/114836/2213/3635/84868/57823/54440/9437/…
BP	GO:0030595	leukocyte chemotaxis	179	0.498047	2.95986	0.00114416	0.011147	0.00739296	3057	tags=58%, list=25%, signal=44%	6280/11240/6374/5142/3929/4067/2919/6279/6364/1525/3576/1906/301/3570/6376/58191/59341/30817/2921/3958/8740/3592/6278/6288/6347/9420/5293/6372/1230/2920/23075/6355/26525/1907/3965/8792/3627/56833/3553/3815/5641/284340/5197/7941/7852/5144/6354/972/6352/3689/151647/6362/3269/6351/7474/1880/2358/7042/6357/1234/3569/6373/6868/4856/10563/3071/6367/6283/2150/2207/6369/683/8291/3735/2841/23765/6375/5294…
BP	GO:0002699	positive regulation of immune effector process	173	0.438429	2.59819	0.00114548	0.011147	0.00739296	2637	tags=49%, list=21%, signal=39%	3929/4067/136/154064/301/7037/30817/79465/8767/3592/80328/51704/80329/201294/353091/5817/3965/3134/8809/64127/941/3553/3133/7124/5650/11314/3106/972/718/135250/3689/567/3606/25818/2268/7474/942/5724/8807/3566/10892/958/89870/10666/3109/91543/3569/3554/1394/5788/10859/51744/3805/4049/3105/3594/2150/2207/114836/54440/3684/149233/3735/3902/30009/6375/4068/940/3458/57102/8832/50943/695/5880/51571/237…
MF	GO:0015291	secondary active transmembrane transporter activity	174	0.299995	1.77767	0.00114548	0.011147	0.00739296	2239	tags=30%, list=18%, signal=25%	11254/154091/10568/1183/6564/64078/117247/6523/115019/55343/6530/11182/10479/85414/83959/6566/6557/84879/6511/9154/84561/28968/10991/56172/81796/1184/6538/388662/8884/6565/28231/120103/9194/6507/8273/57210/6556/9197/206358/1836/133308/123041/115111/6534/353189/51296/6581/389015/55117/254428/6536/9123/6579
BP	GO:0048863	stem cell differentiation	181	0.290689	1.72784	0.00114548	0.011147	0.00739296	4204	tags=50%, list=34%, signal=33%	157506/1906/6422/2348/2296/1021/23603/3976/3091/6662/55553/23198/399694/6496/8463/4851/6608/2627/678/5698/3815/10413/80326/144165/5156/8828/7042/5008/6664/5788/3084/2303/84541/6663/6774/5690/2/4909/81606/30812/4004/223117/100170841/9723/865/4040/8320/5696/3651/655/1482/130497/6591/8829/6722/5308/26585/860/8482/10507/5713/8321/6862/8929/5610/4780/5692/90/7476/9839/5708/8854/2668/4208/2335/170506/4…
BP	GO:0050851	antigen receptor-mediated signaling pathway	181	0.442251	2.62872	0.00114548	0.011147	0.00739296	3149	tags=54%, list=25%, signal=41%	27242/5142/4067/2633/79679/5621/4690/3783/8767/3958/26191/8934/9473/9404/5293/5336/23198/5698/634/4340/150372/100/5588/952/5771/10384/5144/11314/5295/5063/56940/3122/10892/10666/2533/3932/84174/1540/5788/11119/3937/3071/1493/11006/54900/53347/3123/696/3702/9402/2213/5579/3635/5690/919/920/89857/917/3117/11118/974/23228/915/916/865/4332/940/50943/3113/695/5079/23118/7294/5696/10385/387357/2534/508…
BP	GO:0071216	cellular response to biotic stimulus	181	0.498704	2.96427	0.00114548	0.011147	0.00739296	2980	tags=55%, list=24%, signal=42%	1051/3383/3934/445/6374/7097/5142/3929/4067/2919/64581/140885/10333/834/3576/8564/6376/7096/79931/8767/2921/26191/80380/5578/3592/2950/824/6347/7128/4064/9516/4057/6372/2920/3656/26525/114769/3627/64127/941/3553/671/7124/5197/27063/5144/6352/10288/440068/23643/3606/29126/7474/942/5724/10892/259230/3654/57103/7431/1234/929/3569/6373/10563/7133/1604/199713/10859/10891/968/3394/730249/2672/923/2213/…
BP	GO:1903039	positive regulation of leukocyte cell-cell adhesion	181	0.525853	3.12565	0.00114548	0.011147	0.00739296	3057	tags=62%, list=25%, signal=47%	3383/4067/140885/8440/79679/301/3570/7037/864/4690/8767/8876/3600/80380/7525/8740/3574/3592/6347/8808/3718/8651/3965/10673/3559/64127/941/9308/3553/3133/7124/100/5588/3575/7412/29851/972/6352/5295/5063/10288/3689/81704/2113/64115/3606/29126/4860/1803/942/5724/3566/10892/3654/3109/3569/3932/961/604/1540/5788/3071/1493/1604/10859/10326/11006/3594/3037/8744/923/9402/55423/84868/54440/5133/920/149233…
BP	GO:0002440	production of molecular mediator of immune response	156	0.427153	2.49975	0.00114679	0.011147	0.00739296	2905	tags=51%, list=23%, signal=40%	7097/55765/7037/3592/115004/51704/3718/284/23075/353091/200558/10673/3134/8809/64127/3553/3815/3133/7124/5452/2590/5650/3575/9466/972/25939/11213/567/3606/25818/7474/8807/3566/10892/958/7042/10666/91543/3569/6556/3554/604/10225/5788/7133/1604/10859/51744/3805/2150/2207/54900/2213/54440/9245/3735/10758/9474/30009/6375/940/50943/695/29802/729230/115352/8013/114548/57379/9188/9156/8482/959/126259/47…
BP	GO:0042113	B cell activation	180	0.43222	2.56642	0.00114679	0.011147	0.00739296	4006	tags=61%, list=32%, signal=42%	27242/4067/6422/7037/57162/8326/3574/677/7128/4064/5293/5336/222487/286410/3718/23075/200558/10673/678/64127/56833/3815/150372/100/5452/952/5771/3575/7412/11314/112616/9466/972/5295/1880/10892/958/196/3569/604/84174/6868/1540/5788/3071/1493/1380/338376/54900/3149/2213/5579/3635/683/54440/1503/974/970/23228/30009/159296/4332/940/4853/50943/695/64092/139818/115352/22806/100423062/3688/115350/930/57…
BP	GO:0050663	cytokine secretion	178	0.506787	3.00824	0.00114679	0.011147	0.00739296	2690	tags=54%, list=22%, signal=43%	1116/27242/7097/5005/4067/3459/2633/5004/10333/834/3556/79679/301/6376/7096/59341/965/8767/7850/26191/6288/7128/284/55612/8651/4321/115362/26525/114769/3965/5371/4851/9447/353514/64127/5552/3553/7124/26253/64135/9466/255231/3694/440068/29126/2268/7474/4860/23601/4317/3566/93978/5008/5734/929/24145/11119/3937/7133/199713/10859/51744/6283/2150/51311/2597/2213/7100/3552/914/8291/84868/58484/3735/111…
BP	GO:0050707	regulation of cytokine secretion	156	0.493446	2.88771	0.00114679	0.011147	0.00739296	2690	tags=53%, list=22%, signal=42%	27242/7097/5005/4067/3459/2633/5004/10333/834/3556/79679/301/6376/7096/59341/965/8767/7850/26191/6288/7128/284/55612/8651/4321/26525/114769/3965/5371/9447/353514/64127/5552/3553/7124/26253/64135/9466/440068/29126/2268/7474/23601/4317/3566/93978/5008/5734/929/24145/7133/199713/10859/51744/2150/51311/2597/2213/7100/3552/914/84868/3735/5047/23765/9474/7114/3458/50943/2219/23705/1436/10385/55801/2898…
MF	GO:0061134	peptidase regulator activity	156	0.323669	1.89415	0.00114679	0.011147	0.00739296	4434	tags=54%, list=36%, signal=35%	5918/6590/8837/834/5266/144568/1075/330/8740/25816/710/27151/1476/5271/135228/23198/4057/5268/114769/26998/10010/5270/6318/6197/351/5272/718/440068/64115/5055/9806/1475/4118/6317/89777/26577/8434/329/1285/199713/10392/8710/5265/2597/2/8530/871/183/51377/5627/1474/51050/89932/6622/1447/6690/5273/89766/7077/939/57119/128488/197/90199/404203/56925/9994/831/2335/7021/5858/27344/7980/2192/284293/3273/…
BP	GO:0034341	response to interferon-gamma	162	0.533995	3.14254	0.00114811	0.011147	0.00739296	3446	tags=68%, list=28%, signal=50%	3383/4281/445/9076/8942/7097/3459/2633/6364/140885/834/1906/9111/6376/58191/965/10537/2634/4261/1612/338382/10346/6347/8651/6355/115362/3965/10096/3134/5371/84166/55647/3133/7791/3460/5771/817/7412/6354/3106/6352/163351/3659/6362/567/6351/29927/7474/5724/3662/3122/7431/6357/6556/961/9021/10492/6367/115361/10437/3105/3594/3123/6369/3394/730249/2597/3055/85363/149233/3117/2643/4360/6375/3458/6772/5…
BP	GO:0051048	negative regulation of secretion	162	0.360553	2.12184	0.00114811	0.011147	0.00739296	2650	tags=39%, list=21%, signal=31%	27242/2633/10333/1906/6422/301/6376/7850/3976/26191/84830/7128/284/26525/114769/3965/3134/5371/4851/353514/5552/3553/634/7447/7132/7124/100/11314/9466/972/440068/131177/5008/5734/91543/4856/1394/3084/7133/199713/10859/9448/79651/2150/51311/2213/80763/3418/4828/497189/7114/8832/50943/308/10385/729230/28984/131450/307/114548/55024/6622/1447
BP	GO:0070555	response to interleukin-1	149	0.469029	2.74313	0.00114811	0.011147	0.00739296	1768	tags=39%, list=14%, signal=34%	1051/3383/1116/3934/2633/6364/140885/2244/3556/3576/1906/8564/6422/301/6376/2266/57162/8767/2634/7850/3091/5578/6662/6347/8808/23198/3656/6355/3965/10010/8792/64127/3553/5698/351/952/27063/6354/6352/6362/2113/11213/6351/3654/6357/3569/3554/961/6367/199713/10392/3037/6369/730249/3552/9705/5690/91807
BP	GO:0097529	myeloid leukocyte migration	158	0.513693	3.00902	0.00114811	0.011147	0.00739296	2858	tags=58%, list=23%, signal=45%	6280/6374/5142/3929/4067/2919/6279/6364/1525/140885/3576/1906/301/3570/6376/59341/30817/2921/3958/6278/6288/6347/5293/6372/1230/2920/23075/6355/26525/1907/8792/3627/56833/3553/3815/5641/284340/5197/7941/5144/11314/6354/255231/972/6352/3689/151647/6362/3269/6351/2358/7042/6357/5734/3569/3554/961/6373/4856/10563/3071/6367/6283/2207/6369/683/8291/3735/23765/6375/5294/5880/6846/5800/8600/120425/7409/…
BP	GO:0006959	humoral immune response	182	0.469463	2.78972	0.00114943	0.011147	0.00739296	3841	tags=63%, list=31%, signal=44%	6480/6280/3934/27242/6590/6374/2919/6279/722/2244/3576/57115/715/5266/1672/716/966/2921/3853/3426/3574/710/6278/6347/4057/124976/6372/2920/54210/26525/4851/51279/3627/9308/3553/3133/671/7124/5197/5452/5646/5650/2243/718/717/114771/25818/1880/1379/51435/6357/1378/3569/6556/6373/5788/10563/1604/4069/1380/4049/6283/338376/730249/2597/2213/10578/683/2/1755/84659/5133/5450/725/10758/4068/940/3458/2219…
BP	GO:0042742	defense response to bacterium	168	0.463974	2.73813	0.00114943	0.011147	0.00739296	3622	tags=57%, list=29%, signal=41%	1051/6280/3934/6590/7097/3929/6279/6364/2244/10333/57115/3570/1672/8767/1969/2634/3853/3592/6278/306/4057/6372/10133/64127/56833/4025/7132/3133/671/7124/26253/5650/2243/9466/163351/114771/64170/25818/2268/338339/2358/3569/6556/6868/10563/51316/115361/4069/4049/10392/6283/338376/2150/2207/3394/7100/10578/84868/11096/1755/84659/58484/920/149233/6693/4615/219972/117159/3346/100423062/114548/57379/43…
BP	GO:0043122	regulation of I-kappaB kinase/NF-kappaB signaling	168	0.40687	2.40114	0.00114943	0.011147	0.00739296	2267	tags=41%, list=18%, signal=34%	55765/8837/140885/10333/834/7052/6376/57162/79931/8767/10537/330/2950/10346/51704/7128/9516/4057/284/26525/114769/3965/10133/10010/7088/6285/64127/10783/3553/7132/7124/4919/51026/80216/972/64170/9641/7474/10913/10892/958/93978/3654/6275/2316/8795/329/6398/10392/92610/9020/6283/2150/5579/7105/85363/920/356/10758/27032/8743/6772/843/23118/10475/4615/10342/153090/8600
BP	GO:0048705	skeletal system morphogenesis	157	0.313647	1.83524	0.00114943	0.011147	0.00739296	4000	tags=49%, list=32%, signal=34%	157506/6422/25902/2296/59341/50515/6662/3198/133522/4057/302/2734/84159/4664/55790/5156/2268/144347/51435/4188/5915/6664/7046/1749/2303/56603/3037/4147/4256/285590/6259/257/3200/3227/871/85301/249/497189/27173/5079/4040/6474/5075/51715/7289/655/59338/130497/9249/26585/4323/860/654/1490/1112/6862/8785/60529/1690/29123/5396/5027/7476/1739/579/4322/649/4146/3224/4208/3199/22856/3201/3203/7048/1499/4…
BP	GO:0050870	positive regulation of T cell activation	169	0.521024	3.07769	0.00114943	0.011147	0.00739296	3458	tags=66%, list=28%, signal=48%	4067/140885/8440/79679/301/3570/7037/864/4690/8767/8876/3600/80380/7525/8740/3574/3592/6347/8808/3718/8651/3965/10673/3559/64127/941/9308/3553/3133/100/5588/3575/7412/29851/972/6352/5295/5063/10288/81704/64115/3606/29126/4860/1803/942/3566/10892/3109/3569/3932/961/604/1540/5788/3071/1493/1604/10859/10326/11006/3594/8744/923/9402/55423/84868/54440/5133/920/149233/30835/970/100133941/916/865/6375/9…
BP	GO:0051607	defense response to virus	168	0.388691	2.29385	0.00114943	0.011147	0.00739296	5080	tags=68%, list=41%, signal=41%	2633/3455/3428/5359/3600/54541/330/10346/115004/7128/146857/91607/201294/4321/5371/84166/9447/3559/3627/3553/6502/3588/5551/64135/25939/27350/3659/64108/64170/958/89870/4600/91543/3569/10622/5788/2316/329/10859/9020/338376/3594/2150/51311/10964/3433/1755/7105/85363/149233/10758/3458/6772/10475/200315/50489/10410/4939/4283/3437/6397/114548/6773/57379/9188/6036/4599/8638/51297/10875/51191/7187/3383…
BP	GO:2000116	regulation of cysteine-type endopeptidase activity	169	0.329205	1.94462	0.00114943	0.011147	0.00739296	2927	tags=38%, list=24%, signal=29%	6280/8837/6279/64581/834/355/27074/3428/8767/837/5329/9966/1410/5743/330/64065/1612/8740/25816/4057/114769/3965/112399/5371/4217/9447/6197/5698/5272/5641/7124/637/8797/64170/10892/2904/3932/444/8795/329/1285/10392/1611/9705/7498/8530/58484/356/8743/843/838/1509/6091/2534/4210/9647/10017/114548/6622/1447/5896/1490/3491/55081
BP	GO:0010466	negative regulation of peptidase activity	183	0.287444	1.7116	0.00115075	0.011147	0.00739296	1791	tags=26%, list=14%, signal=23%	5918/6590/8837/5266/144568/27074/3428/5329/1410/5743/728113/330/8740/25816/710/27151/1476/653145/5271/135228/4057/5268/114769/26998/5270/6318/6197/351/5272/718/440068/274/5055/9806/1475/6317/1378/89777/8434/329/1285/199713/8710/5265/8301/2597/2/8530
BP	GO:0048872	homeostasis of number of cells	183	0.304461	1.81293	0.00115075	0.011147	0.00739296	4254	tags=50%, list=34%, signal=34%	5142/4067/301/1021/3091/6662/8740/3574/677/7128/5293/55553/124976/6372/9258/3718/3965/53833/10673/4851/6608/3559/3815/100/5771/3575/972/10320/2034/2113/10000/567/1880/10107/3569/604/6868/4856/1540/3071/6774/2207/3635/54440/4004/159296/6772/50943/8444/27240/6688/84636/9770/1233/729230/139818/1435/11151/3059/440712/6722/10461/6654/1236/5896/10603/84433/9935/60682/51542/2271/171023/84456/5027/7049/3…
MF	GO:0005539	glycosaminoglycan binding	170	0.347563	2.05184	0.00115207	0.011147	0.00739296	4351	tags=55%, list=35%, signal=36%	7097/4316/145864/57115/9982/6422/5621/9508/30817/9388/3918/6288/4057/6372/6355/9289/5727/5270/3627/64127/351/8838/2247/59352/5197/6649/10457/6354/8828/114771/9806/26577/6373/4856/50964/59271/5788/10563/10392/9510/84870/11096/5549/84659/3068/2252/1809/51144/308/6402/655/3026/340419/307/8829/114548/26279/4353/1839/2254/1490/3491/284654/23213/51816/5048/3512/404037/83716/3075/11167/7049/5792/26032/9…
BP	GO:0007160	cell-matrix adhesion	154	0.328692	1.9219	0.00115207	0.011147	0.00739296	2896	tags=39%, list=23%, signal=30%	1946/2244/6422/6376/2266/6281/2824/1021/23603/5796/55612/4321/10855/3987/10232/22998/87/7791/10516/27185/7412/2243/3694/5295/3689/3695/56940/4921/10979/8910/3897/284348/604/10225/4585/9475/11170/9448/683/64098/9723/916/5328/59339/349633/6614/7414/1435/56999/3691/9647/8829/3688/6722/3683/1236/4323/1490/1029/4771
BP	GO:0031348	negative regulation of defense response	154	0.399627	2.33667	0.00115207	0.011147	0.00739296	2614	tags=42%, list=21%, signal=34%	116379/140885/9111/6376/5465/3428/7850/710/6288/2950/7128/9258/4321/3965/53833/3134/113/84166/3559/4907/56833/6318/634/5272/7132/3133/100/284340/5771/90268/25939/2113/11213/2358/5734/1378/64838/9021/10225/4856/5788/7133/199713/10859/3805/730249/2213/84868/2/89790/7105/8530/225/54625/50943/11326/10475/5467/4210/284467/133060/6397/131450/114548/5740
BP	GO:0071219	cellular response to molecule of bacterial origin	170	0.510733	3.01511	0.00115207	0.011147	0.00739296	2980	tags=56%, list=24%, signal=43%	1051/3383/3934/445/6374/7097/5142/3929/4067/2919/140885/10333/834/3576/8564/6376/7096/79931/8767/2921/26191/80380/5578/3592/2950/824/6347/7128/4064/9516/4057/6372/2920/3656/26525/114769/3627/64127/941/3553/671/7124/5197/27063/5144/6352/10288/440068/23643/3606/29126/7474/942/5724/10892/259230/3654/7431/1234/929/3569/6373/10563/7133/1604/199713/10859/10891/968/3394/730249/2672/923/2213/3055/84868/8…
BP	GO:0010810	regulation of cell-substrate adhesion	155	0.338605	1.98008	0.0011534	0.011147	0.00739296	2896	tags=39%, list=23%, signal=30%	1946/2633/2244/6422/6376/2266/6281/2824/1021/23603/6251/84034/10562/2651/25975/201294/55612/4321/4241/3987/4851/22998/27185/2243/5295/80005/56940/9806/4921/8324/23189/604/2316/9475/11170/9448/3037/2199/10630/683/9723/916/51144/5880/5328/5800/59339/811/90187/349633/10109/1435/9647/8829/57091/1236/4323/1029/3491/4771
BP	GO:0070302	regulation of stress-activated protein kinase signaling cascade	167	0.379767	2.23484	0.0011534	0.011147	0.00739296	4059	tags=54%, list=33%, signal=37%	4281/55765/4067/1956/140885/10333/1906/6422/355/84451/59341/22943/8767/197259/26191/2950/6386/650/9258/26525/4217/2047/8792/64127/7164/3553/351/7124/56940/8877/64170/7474/10913/4317/8324/7042/6317/29969/653361/1540/10392/6504/9448/2150/2213/7498/221472/3735/5911/389432/153090/8600/9770/22881/153769/55801/11184/1236/959/1647/1490/2043/344558/2308/939/5048/57216/5610/23236/23043/392255/7098/7476/70…
BP	GO:0002573	myeloid leukocyte differentiation	165	0.401575	2.36211	0.00115473	0.011147	0.00739296	3957	tags=55%, list=32%, signal=38%	1051/7097/4067/6422/7037/84959/3428/1969/1021/10537/56975/146433/3600/3976/5578/3930/677/133522/5293/135228/4057/1230/5457/302/8792/634/3815/79705/11025/351/7124/116071/5771/972/5295/55509/1945/5971/126014/3662/1880/9290/10859/11006/2150/2207/3635/133308/920/149233/1437/159296/3458/4853/2124/8600/6688/1436/9770/8544/4286/1435/3059/1236/139716/6348/10100/9935/5048/133396/3593/4627/4318/7071/375387…
BP	GO:0019722	calcium-mediated signaling	165	0.315213	1.85412	0.00115473	0.011147	0.00739296	3948	tags=50%, list=32%, signal=34%	1827/55784/2633/6364/1956/3576/1906/1672/5621/1756/5336/1230/57158/1907/5031/79041/7124/100/7852/817/7412/5144/5562/8877/10663/5341/6351/2358/5737/2904/1234/84174/2274/5788/51806/3084/91860/683/920/916/9454/83988/5026/695/9472/1238/51554/8600/2829/51196/22953/1233/729230/50852/1236/1237/8445/10803/9104/4775/6348/79772/2833/6546/1193/2903/55151/5534/5027/56704/6401/7535/7462/493/6262/9034/9759/685…
BP	GO:0043491	protein kinase B signaling	165	0.334107	1.96525	0.00115473	0.011147	0.00739296	2787	tags=41%, list=22%, signal=32%	1116/4233/1956/23551/6376/118788/1969/6662/84830/677/6347/5293/9542/6934/2651/9258/284/10855/941/3553/3815/2069/2247/7124/29851/6352/5295/4015/5156/3606/942/958/5008/3932/7046/1646/3084/255324/5314/7498/7039/2252/10253/2250/114897/940/5294/57462/5880/8600/10385/7409/2534/50852/23533/59338/55801/85453/3059/3688/930/55024/10461/5290/1236/1839/2254/112464
BP	GO:0050670	regulation of lymphocyte proliferation	165	0.526221	3.09529	0.00115473	0.011147	0.00739296	3998	tags=72%, list=32%, signal=50%	1051/27242/4067/8440/79679/301/3570/5621/7037/4690/57162/3620/8767/3600/3958/26191/80380/3574/3592/51083/3718/3965/53833/10673/3559/941/3553/3133/100/5588/952/10457/7412/11314/972/6352/3659/10288/64115/3606/29126/4860/942/1880/958/196/6664/3109/3569/604/5788/7133/3071/1493/1604/10859/3594/8744/923/2213/3635/683/84868/54440/920/149233/4004/30835/6693/970/100133941/916/6375/4332/940/50943/3113/695/…
BP	GO:0002685	regulation of leukocyte migration	148	0.450403	2.62832	0.00115607	0.011147	0.00739296	3835	tags=59%, list=31%, signal=42%	3383/4478/11240/3929/4067/6364/3576/1906/301/3570/59341/3958/8740/3592/84830/6278/6347/1230/23075/6355/1907/3965/3627/56833/351/5641/7124/100/284340/7941/11314/6354/9466/972/6352/81704/6351/7474/5724/2358/5734/3569/3554/6868/4856/10563/3071/2150/6369/683/8291/3735/2841/6693/6375/5880/6846/811/729230/9750/1435/57118/131450/26585/1236/4323/4354/26228/728/6348/2833/22914/101/199/63940/7499/5919/2323…
BP	GO:0060348	bone development	148	0.339791	1.98284	0.00115607	0.011147	0.00739296	3739	tags=49%, list=30%, signal=35%	6715/2296/59341/9060/56975/6662/5251/139285/5358/4057/124976/650/302/2734/3815/79705/4664/55790/4015/144347/51435/5734/5915/5788/1749/10859/56603/3037/4147/6261/133308/285590/26160/871/85301/249/497189/4211/4853/4040/6474/8600/5075/51715/7289/6722/9249/5308/26585/4323/860/5479/654/9104/10507/1112/23213/5048/2688/6862/10006/8785/1690/29123/55151/171023/55294/196527/2313/4322/7305/4146/4208
BP	GO:1903708	positive regulation of hemopoiesis	148	0.407928	2.38046	0.00115607	0.011147	0.00739296	3835	tags=55%, list=31%, signal=39%	301/864/2296/8767/146433/8876/3600/3976/3091/5578/3574/3592/677/133522/338382/8808/1230/286410/8651/3965/5457/3559/941/9308/7124/100/9760/3575/972/10288/2113/64115/3606/4860/942/3566/10892/604/1540/5788/3071/11006/6774/3594/8744/3635/133308/54440/920/149233/865/3458/6772/50943/695/2124/8600/10385/1435/3059/440712/114548/4323/5896/101/939/9840/60682/3593/7071/9655/10221/3135/7535/4352/841/7305/273…
BP	GO:0001649	osteoblast differentiation	153	0.316705	1.84987	0.00115741	0.011147	0.00739296	4452	tags=51%, list=36%, signal=33%	1051/25937/6422/64093/3570/22800/1969/1021/56975/3371/4057/650/6615/3400/4851/5727/6608/7124/10457/6696/651/3486/4015/23601/4921/6664/3569/10492/1749/30812/285590/249/865/117581/6474/9770/655/340419/6591/9188/26585/860/8482/2254/654/1052/63979/10507/6348/3491/23560/115908/8321/5587/7290/90/6238/4091/4208/9759/2736/1591/3199/8626/847/9464/1499/25842/8519/4041/92/7171/43/3399/89780/26271/7481/9902
BP	GO:0002703	regulation of leukocyte mediated immunity	163	0.488087	2.86296	0.00115741	0.011147	0.00739296	2637	tags=54%, list=21%, signal=43%	4067/722/136/154064/7037/30817/79465/3592/80328/80329/6372/3718/201294/353091/5817/3965/53833/200558/3134/8809/64127/6318/3553/634/5272/3133/7124/3575/11314/3106/9466/718/135250/3689/567/56940/3606/2268/5724/8807/3566/10892/958/10666/91543/1378/3569/3554/604/10225/1394/5788/7133/10859/3805/4049/3105/3594/2150/2207/114836/2213/84868/54440/3684/9437/149233/725/3902/30009/6375/4068/940/57102/8832/50…
BP	GO:0009612	response to mechanical stimulus	163	0.317056	1.85975	0.00115741	0.011147	0.00739296	2801	tags=36%, list=23%, signal=28%	1116/4316/1956/834/1906/355/59341/1756/8796/3371/5743/6662/8740/8061/8200/5727/5270/3627/3553/3815/5493/1265/7132/7852/3759/27063/117531/3659/8797/2113/23349/958/6507/5734/50964/8795/943/9020/3776/51311/7100/3356/183/10343/497189/6772/838/4615/4212/2534/9750/1111/4131/476/4323/4353/5028/1647/654
BP	GO:0010001	glial cell differentiation	153	0.373672	2.18261	0.00115741	0.011147	0.00739296	2127	tags=33%, list=17%, signal=28%	27242/7097/25825/4067/3459/6279/57211/1956/26227/1021/146433/7101/3976/6662/2950/9334/55553/4781/650/3400/4851/85414/6608/5270/6285/400746/3553/79628/351/7124/4664/4919/5080/7852/10397/274/92737/2358/7431/6664/3569/3084/7133/6663/6774/30812/745/5803/2250/3458/10810
BP	GO:0050920	regulation of chemotaxis	163	0.373286	2.18957	0.00115741	0.011147	0.00739296	3120	tags=47%, list=25%, signal=35%	4233/11240/3929/4067/3576/1906/3570/59341/8740/3592/6278/2950/6347/1230/23075/1907/65249/3965/4851/3627/56833/5641/2247/284340/7941/7852/5771/6354/972/6352/5156/6351/7474/1880/2358/3569/6868/4856/10563/3071/2150/683/8291/6259/3735/2841/223117/9723/6375/7114/5880/6846/5800/811/6091/23077/1233/729230/56670/9750/1435/9647/57118/8829/26585/1236/4354/8482/26228/10507/728/6348/22914/199/5587/63940
BP	GO:0051701	interaction with host	153	0.369898	2.16056	0.00115741	0.011147	0.00739296	3230	tags=44%, list=26%, signal=33%	3383/9076/59272/4233/1956/1525/3576/7037/5806/1969/3853/6355/5817/3965/7113/2982/5371/941/5272/4340/7852/972/3694/858/3695/50848/1803/942/23601/89870/6317/1234/1378/10107/8724/5818/79720/1604/1380/3839/6504/2597/3356/85363/402569/920/1508/30835/4360/3840/51193/2219/10475/10410/867/11060/3688/286827/91392/81607/949/2838/4864/6737/5610/6404/3690
MF	GO:0005125	cytokine activity	166	0.452747	2.65965	0.00116144	0.011147	0.00739296	4171	tags=61%, list=34%, signal=41%	6374/2919/6364/3576/1906/10135/6376/58191/146433/9966/2921/3600/3976/8740/3574/3592/6347/6372/650/2920/6355/26525/8200/10673/9235/3627/3553/2247/7124/5197/6696/6354/112616/6352/651/6362/3606/6351/7474/131177/7042/5008/6357/3569/6373/3084/10563/6367/6398/4049/338376/6369/8744/3552/4982/57152/1437/356/970/6375/8743/3458/6846/8600/4283/655/1435/55801/26585/959/656/654/944/6348/4050/3586/3593/392255/…
BP	GO:0019882	antigen processing and presentation	166	0.346193	2.0337	0.00116144	0.011147	0.00739296	3978	tags=51%, list=32%, signal=35%	3383/3112/1520/23198/3108/5873/3134/6891/64127/4688/6890/5698/5641/3133/1515/3106/972/10288/10981/567/5971/3122/3109/6556/653361/1536/10437/1514/10392/3105/968/2207/3123/83547/2213/5690/51762/3117/30835/9474/3902/50856/4689/55016/3113/1509/50489/811/5696/130340/1780/909/6712/2210/7454/55080/3107/1236/3111/3077/3127/10875/8905/5713/23180/3120/3119/9363/2209/3115/162/5692/3135/925/5708/81930/6892/1…
BP	GO:0032872	regulation of stress-activated MAPK cascade	166	0.375651	2.20674	0.00116144	0.011147	0.00739296	4059	tags=54%, list=33%, signal=37%	4281/55765/1956/140885/10333/1906/6422/355/84451/59341/22943/8767/197259/26191/2950/6386/650/9258/26525/4217/2047/8792/64127/7164/3553/351/7124/56940/8877/64170/7474/10913/4317/8324/7042/6317/29969/653361/1540/10392/6504/9448/2150/2213/7498/221472/3735/5911/389432/153090/8600/9770/22881/153769/55801/11184/1236/959/1647/1490/2043/344558/2308/939/5048/57216/5610/23236/23043/392255/7098/7476/7099/98…
BP	GO:0032944	regulation of mononuclear cell proliferation	166	0.527159	3.09678	0.00116144	0.011147	0.00739296	3998	tags=72%, list=32%, signal=50%	1051/27242/4067/8440/79679/301/3570/5621/7037/4690/57162/3620/8767/3600/3958/26191/80380/3574/3592/51083/3718/3965/53833/10673/3559/941/3553/3133/100/5588/952/10457/7412/11314/972/6352/3659/10288/64115/3606/29126/4860/942/1880/958/196/6664/3109/3569/604/5788/7133/3071/1493/1604/10859/3594/8744/923/2213/3635/683/84868/54440/920/149233/4004/30835/6693/970/100133941/916/6375/4332/940/50943/3113/695/…
BP	GO:0051924	regulation of calcium ion transport	166	0.316241	1.85775	0.00116144	0.011147	0.00739296	4263	tags=54%, list=34%, signal=36%	3383/196996/5142/4067/6769/6376/5621/84959/342667/1756/3958/23566/5743/6347/5336/1230/57158/5371/5031/302/79041/353514/3627/7852/817/5144/117531/6352/10288/274/6351/4638/6373/1394/10859/6271/1729/8291/920/4923/183/9474/9454/6375/5026/8832/9472/5294/9456/55636/162514/4283/22953/2534/815/115352/11151/930/945/6622/6690/9104/6348/6546/57119/1193/6236/2916/55151/5027/56704/7439/3596/3603/54106/6262/15…
BP	GO:0071222	cellular response to lipopolysaccharide	166	0.505473	2.96938	0.00116144	0.011147	0.00739296	2980	tags=55%, list=24%, signal=43%	1051/3383/3934/445/6374/7097/5142/3929/4067/2919/140885/834/3576/8564/6376/79931/8767/2921/26191/80380/5578/3592/2950/824/6347/7128/4064/9516/4057/6372/2920/3656/26525/114769/3627/64127/941/3553/671/7124/5197/27063/5144/6352/10288/440068/23643/3606/29126/7474/942/5724/10892/259230/3654/7431/1234/929/3569/6373/10563/7133/1604/199713/10859/10891/968/3394/730249/2672/923/3055/84868/85363/1437/4360/1…
BP	GO:0001763	morphogenesis of a branching structure	140	0.327036	1.89817	0.00116279	0.011147	0.00739296	4269	tags=54%, list=34%, signal=36%	157506/133/4233/7052/1906/6422/53335/1969/3371/6662/6768/5629/650/7475/2119/5371/4851/5727/6608/57057/10413/2247/7124/7490/7474/5361/284217/9021/2303/6663/639/84870/30812/1522/183/9723/2252/10253/4040/10481/6474/6997/57471/655/340419/1435/6591/8829/6722/4323/2297/3237/3586/23213/57216/90/1739/2668/64783/7472/2736/8626/7080/7048/1499/10371/1950/4041/4070/59277/120892/9175/3845/3202/3239
BP	GO:0010952	positive regulation of peptidase activity	139	0.389425	2.26035	0.00116279	0.011147	0.00739296	2927	tags=45%, list=24%, signal=34%	6280/8837/4067/6279/64581/834/355/3428/8767/837/9966/64065/1612/23198/3965/112399/5371/4217/10010/9447/351/5641/7124/637/8797/64115/64170/10892/6317/2904/1378/3932/26577/444/8795/9475/1285/10392/1611/6774/8301/9705/7498/58484/3735/356/8743/843/838/1509/6091/2534/4210/9647/10017/1942/114548/6622/1490/2043/3491/55081
BP	GO:0002064	epithelial cell development	147	0.337781	1.96662	0.00116414	0.011147	0.00739296	1631	tags=30%, list=13%, signal=26%	3383/9076/4478/4233/2195/1969/1021/4643/56913/3091/688/6662/5962/6768/5629/1286/6496/4851/54507/6608/9294/3553/64919/7132/7124/5080/7852/1761/5144/117531/81029/6382/7474/50848/57103/7431/5915/6098/2316/9475/2303/7111/2150/639
BP	GO:0002221	pattern recognition receptor signaling pathway	147	0.490969	2.85851	0.00116414	0.011147	0.00739296	2284	tags=48%, list=18%, signal=39%	6280/7097/55765/3929/4067/6279/64581/2244/10333/57115/2266/7096/57162/118788/79931/8767/8685/26191/330/338382/1520/7128/4057/9258/3656/10010/64127/6197/5641/26253/64135/11314/80216/2243/90268/3659/7321/3689/11213/23643/114771/9641/3662/3654/89870/91543/929/1540/329/1514/10392/92610/2150/6271/51311/730249/2672/7100/84868/1755/7105/3684/85363/1508/695/2219/23118/4615/153090/5608
BP	GO:0048738	cardiac muscle tissue development	147	0.313037	1.82256	0.00116414	0.011147	0.00739296	2684	tags=35%, list=22%, signal=28%	1525/1906/2296/5465/22943/5997/55553/5629/650/57158/5457/4851/2627/57057/10413/2247/27063/5292/5156/7490/115701/7474/5318/8324/7042/5915/7046/60485/205428/4604/3084/2303/3776/4606/91807/183/9474/4211/8470/9472/811/55636/655/7139/1482/11149/1829/56999/3688/6722/2702/26585
BP	GO:0007254	JNK cascade	144	0.394367	2.29309	0.0011655	0.011147	0.00739296	4173	tags=57%, list=34%, signal=38%	136/1956/140885/10333/1906/6422/84451/59341/22943/8767/1852/197259/26191/2950/6386/9258/3656/26525/4217/2047/8792/64127/7164/3553/351/7124/56940/64170/7474/10913/4317/8324/3654/6317/5734/29969/653361/1540/10392/6504/9448/2150/2213/221472/5911/389432/23118/153090/8600/9770/22881/153769/11184/1236/959/1647/1490/2043/344558/939/5048/57216/6233/23236/23043/10221/7098/7476/7099/9839/54106/23328/64853/…
BP	GO:0042098	T cell proliferation	144	0.530493	3.08462	0.0011655	0.011147	0.00739296	3998	tags=72%, list=32%, signal=50%	1051/27242/4478/8440/79679/301/3570/5621/7037/4690/57162/3620/8767/3600/3958/80380/8740/3592/3718/3965/53833/10673/3559/941/3553/3133/5588/10457/7412/6352/3659/10288/81704/64115/3606/29126/4860/942/1794/10892/3109/3569/6556/5788/11119/7133/3071/1493/1604/10859/3594/8744/923/84868/54440/920/149233/4004/1503/30835/6693/970/100133941/916/6375/940/50943/3113/5294/5880/11326/10385/2000/729230/2534/111…
BP	GO:0050731	positive regulation of peptidyl-tyrosine phosphorylation	145	0.403242	2.34646	0.0011655	0.011147	0.00739296	3503	tags=53%, list=28%, signal=39%	3383/1946/4067/3570/5621/8767/3600/3976/7525/3592/51704/284/285016/353514/941/7804/3815/79705/2069/7132/7124/972/6352/3606/958/5008/3569/9021/653361/6868/5788/3084/255324/6774/3356/920/149233/389658/7039/1437/183/100133941/2252/916/3458/54625/6997/1436/2534/3059/1942/8829/55024/57091/26585/1443/1839/654/26228/10507/2043/3066/2688/9181/133396/10006/4739/3593/2209/3690/55294/90/59067/3596/83666/516…
BP	GO:0050852	T cell receptor signaling pathway	142	0.435123	2.52883	0.0011655	0.011147	0.00739296	3149	tags=53%, list=25%, signal=40%	27242/5142/2633/79679/5621/4690/3783/8767/3958/26191/8934/9473/5293/5336/23198/5698/634/4340/100/5588/5771/10384/5144/11314/5295/5063/56940/3122/10892/10666/2533/3932/1540/5788/11119/3937/1493/11006/53347/3123/696/3702/9402/3635/5690/919/920/917/3117/11118/915/916/940/50943/3113/695/23118/7294/5696/10385/387357/2534/50852/7454/11148/5290/1236/55824/84433/3127/9840/5713/23180/3120/3119
BP	GO:0051216	cartilage development	145	0.339889	1.97781	0.0011655	0.011147	0.00739296	3941	tags=48%, list=32%, signal=33%	1116/1906/64764/864/59341/3696/3091/50515/6662/55553/4781/650/6615/8200/302/2734/2247/25884/7045/55790/651/81029/7474/144347/51435/5915/7046/4856/4147/4256/3200/2202/1302/871/5307/85301/4040/6474/655/340419/130497/6591/6722/26585/860/656/2254/654/1490/3491/23213/4094/389084/8785/1690/5396/392255/7476/579/4322/649/4017/4146/4208/2736/22856/9464/7048/1499
BP	GO:0060541	respiratory system development	144	0.303924	1.7672	0.0011655	0.011147	0.00739296	4701	tags=55%, list=38%, signal=35%	1116/157506/445/1956/220/3976/3371/6662/5251/5629/4781/1907/4851/5754/2627/4311/10413/7124/100/4015/5156/2034/7490/7474/284217/6664/60485/1749/10630/1522/2252/10253/4040/83931/55636/7289/340419/3290/6722/4323/2254/1490/1717/64759/57216/8929/83716/55151/171023/55294/51501/8985/3596/23657/8854/26257/9242/7472/2736/54206/7080/7048/1499/5594/53834/441376/10905/3845/5764/3202/9509/6493/7481/2246/1385/…
BP	GO:0071229	cellular response to acid chemical	144	0.325162	1.8907	0.0011655	0.011147	0.00739296	1623	tags=28%, list=13%, signal=24%	1051/445/9076/4067/1956/1906/6422/53335/2348/58528/3371/6662/7525/824/7475/8651/2707/8463/5031/346673/5754/10413/7124/5562/81029/158376/5156/7474/5724/8324/5737/5734/5915/64121/1646/1536/10891/3779/55022/56603
CC	GO:0101002	ficolin-1-rich granule	136	0.362777	2.09806	0.0011655	0.011147	0.00739296	3189	tags=48%, list=26%, signal=36%	140885/965/3958/2950/1520/1476/5236/23406/51411/5317/11314/10288/3689/4860/3101/338339/2358/10092/1378/6556/2495/89777/2204/51806/3071/1604/10549/2207/56888/6515/5265/1828/1729/3920/240/170482/3608/411/1508/3687/1823/1522/4332/2219/2357/1509/2992/84658/7414/5315/79930/10097/5836/51071/80301/55276/5273/1832/10875/7077/101/5713/83716/8778/4318
BP	GO:1901654	response to ketone	144	0.303265	1.76337	0.0011655	0.011147	0.00739296	3957	tags=45%, list=32%, signal=31%	3383/445/9076/4478/1946/7097/114907/6715/8837/1956/1906/6422/768/54541/3371/8061/5031/10413/952/6696/5562/108/5724/5737/7042/196/5734/1646/1536/9475/6663/79820/730249/1828/2230/2770/10481/811/867/1244/1829/4678/11184/1236/23095/28960/54464/2706/2308/1080/7049/117144/231/4129/2908/109/54331/1535/8644/54206/8751/6363/4976/10062/142
BP	GO:1903531	negative regulation of secretion by cell	145	0.370669	2.15692	0.0011655	0.011147	0.00739296	2633	tags=39%, list=21%, signal=31%	27242/2633/10333/1906/6422/301/6376/7850/3976/26191/84830/7128/284/26525/114769/3965/3134/5371/4851/353514/5552/3553/634/7447/7132/7124/11314/9466/440068/131177/5008/5734/91543/4856/1394/7133/199713/10859/9448/79651/2150/51311/2213/3418/4828/7114/8832/50943/308/10385/729230/28984/131450/307/114548/55024/6622
BP	GO:0050866	negative regulation of cell activation	146	0.511975	2.97824	0.00116686	0.011147	0.00739296	3552	tags=64%, list=29%, signal=46%	1051/27242/4067/57115/79679/6422/301/6376/5621/2266/864/57162/84959/3620/3958/26191/80380/51083/7128/2267/3718/8651/3965/53833/3134/3559/5270/941/634/671/10457/5771/11314/972/3659/201633/10288/5156/56940/64115/114771/29126/942/3566/6664/604/84174/5788/1493/10859/54900/3149/2213/3635/84868/8530/6693/3902/30009/865/6375/114897/4332/8832/50943/695/11326/284021/64092/10385/729230/9750/284467/55024/10…
BP	GO:0070374	positive regulation of ERK1 and ERK2 cascade	146	0.459515	2.67308	0.00116686	0.011147	0.00739296	2880	tags=52%, list=23%, signal=40%	3383/1116/8837/6364/1956/2244/6376/2266/59341/152007/8767/8685/26191/5578/6278/6347/2651/650/1230/9258/284/6355/3965/5031/4851/8792/285016/64127/3815/351/2247/7124/10457/26291/6354/2243/972/6352/5156/6362/1139/6351/1880/2358/9290/6357/5788/6367/10392/6504/2150/195827/6369/3356/55532/84868/388325/920/389658/3735/10253/6375/4853/6846/8600/1436/55801/8829/1236/8482/5028/112464/1490/728/6348/64762
BP	GO:0071346	cellular response to interferon-gamma	146	0.537782	3.12837	0.00116686	0.011147	0.00739296	3446	tags=68%, list=28%, signal=50%	3383/4281/445/9076/7097/3459/2633/6364/140885/834/1906/9111/6376/965/2634/4261/1612/338382/10346/6347/8651/6355/115362/3965/10096/3134/5371/84166/55647/3133/7791/3460/5771/817/7412/6354/3106/6352/163351/3659/6362/567/6351/7474/5724/3662/3122/7431/6357/961/9021/10492/6367/115361/10437/3105/3594/3123/6369/3394/730249/2597/3055/85363/3117/4360/6375/3458/6772/54625/3113/6846/10475/201475/7294/6997/49…
CC	GO:0030027	lamellipodium	135	0.316129	1.8207	0.00117096	0.011147	0.00739296	4018	tags=49%, list=32%, signal=33%	4651/59341/2195/1969/23603/5962/23075/10096/154796/351/3983/81704/6624/56940/1803/10979/4638/10092/57514/3984/54518/10630/23516/8291/221472/55704/1809/10810/8470/154810/23616/5880/5800/9051/10109/4210/348110/11151/72/3688/10097/92154/5290/3737/55740/8476/130271/4771/10642/199/10006/4739/121512/84962/23380/3690/64005/8936/11275/3685/29780/2185/1499/26230/10787/84168
BP	GO:0043123	positive regulation of I-kappaB kinase/NF-kappaB signaling	135	0.421902	2.42989	0.00117096	0.011147	0.00739296	2267	tags=43%, list=18%, signal=36%	55765/8837/10333/834/7052/6376/57162/8767/10537/330/10346/51704/9516/4057/26525/114769/3965/6285/64127/10783/3553/7132/7124/4919/51026/80216/972/64170/9641/10913/10892/958/93978/3654/6275/2316/8795/329/6398/10392/92610/9020/6283/2150/5579/7105/85363/920/356/10758/27032/8743/843/23118/10475/4615/10342/8600
BP	GO:0043542	endothelial cell migration	137	0.360363	2.08292	0.00117096	0.011147	0.00739296	3651	tags=50%, list=29%, signal=35%	4233/1906/9982/301/1545/1969/7101/3091/5578/5743/84830/306/5613/5629/284/4851/6273/634/154796/5641/2247/5646/3689/2113/116150/10000/8828/7474/1803/958/7046/6868/4856/9475/10563/2303/5606/183/7114/154810/23616/811/153090/6091/6997/56999/28984/1942/8829/3688/6722/26585/5290/2050/949/161742/5587/4627/3690/4780/55294/7476/9734/3162/23328/11235/4017/6672
BP	GO:0072524	pyridine-containing compound metabolic process	137	0.327635	1.89375	0.00117096	0.011147	0.00739296	3882	tags=49%, list=31%, signal=34%	8942/29968/5214/8564/10135/2023/5465/3620/54541/3091/5743/5236/11182/53632/4907/5208/5209/351/4199/2327/952/4837/5562/3939/4860/3101/7086/57103/283209/169355/10891/8566/6774/195827/2597/683/3356/5230/3418/3458/23498/80201/2646/51660/9688/5315/5740/51071/55276/7167/5160/316/22934/9631/8514/23279/9563/5027/4200/83666/6120/2326/53371/9759/10762/55706/160728
BP	GO:1904950	negative regulation of establishment of protein localization	135	0.331719	1.91049	0.00117096	0.011147	0.00739296	2628	tags=37%, list=21%, signal=30%	27242/2633/10333/6422/301/6376/7850/26191/84830/7128/284/55612/26525/114769/5371/353514/5552/3553/7447/55432/7124/9466/440068/131177/5734/91543/8724/29969/4856/199713/10859/9448/79651/2150/51311/51465/2213/3418/7114/50943/308/10385/51715/9647/11060/28984/131450/307/114548/55024
CC	GO:0098802	plasma membrane receptor complex	138	0.357611	2.06665	0.00117233	0.011147	0.00739296	3904	tags=51%, list=31%, signal=36%	9180/7097/4067/10333/3570/7037/7096/7018/3696/165829/6386/650/9568/8809/3559/634/3588/1439/3359/3694/3689/3695/567/1139/8807/958/3654/2904/3569/7046/1138/329/926/3594/54518/923/3684/919/920/149233/917/3687/974/915/916/3560/50852/3691/3688/3683/89832/1136/3680/93145/3077/27091/7187/3690/2903/973/90/925/7535/10580/3597/1739/116443/6850/3685/3676/2185
MF	GO:0004866	endopeptidase inhibitor activity	129	0.31014	1.78042	0.00117647	0.011147	0.00739296	4434	tags=54%, list=36%, signal=35%	5918/6590/5266/144568/330/8740/25816/710/27151/1476/5271/135228/4057/5268/114769/26998/5270/6318/6197/351/5272/718/440068/5055/9806/1475/6317/89777/8434/329/1285/199713/8710/5265/2597/2/8530/871/183/51377/5627/1474/89932/6622/1447/6690/5273/7077/939/57119/128488/197/90199/404203/56925/831/7021/5858/27344/7980/284293/3273/7035/51232/286204/5973/5275/5345/5176/3698
BP	GO:0050679	positive regulation of epithelial cell proliferation	129	0.31331	1.79861	0.00117647	0.011147	0.00739296	2991	tags=39%, list=24%, signal=30%	1001/8837/1956/9982/6422/3091/5578/6662/7128/9420/6934/5629/650/4321/4851/6608/64127/2247/6352/858/6331/10000/8828/7474/8324/6664/7046/6868/7051/1749/255324/6774/3037/6369/8291/7039/2252/4853/1750/120425/2683/8013/130497/8829/2254/654/79805/728/3586/3915
BP	GO:0001906	cell killing	134	0.476721	2.7382	0.00117786	0.011147	0.00739296	2563	tags=51%, list=21%, signal=41%	3383/64581/57115/154064/966/79465/1075/3853/3592/80328/80329/4057/6372/201294/353091/5873/5817/3965/3134/6318/634/3002/5272/3133/5551/3575/3106/718/135250/567/114771/3606/8807/1379/6357/10666/5788/1604/10859/4069/3805/6283/3105/3594/2150/114836/2597/2213/8542/10578/84868/57823/3684/9437/149233/3902/6375/4068/3458/51571/23705/7409/117159/909/3346/100431172/11151/3107/56253
BP	GO:0002285	lymphocyte activation involved in immune response	134	0.466905	2.68182	0.00117786	0.011147	0.00739296	2905	tags=54%, list=23%, signal=42%	3383/57115/301/7037/8767/3958/4064/5336/3718/201294/23075/5873/3965/200558/3134/8809/941/634/100/26253/9466/114771/3606/942/5971/3662/1880/3566/338339/10892/958/5734/3109/3569/6556/604/5788/10859/51744/338376/6774/3594/2150/2207/54518/114836/2213/84868/149233/6693/23228/30009/159296/940/3458/4853/50943/4063/8320/139818/100431172/11151/114548/930/3683/57379/257101/9156/959/165918/3936/10875/3586
BP	GO:0030278	regulation of ossification	134	0.31038	1.78277	0.00117786	0.011147	0.00739296	4069	tags=49%, list=33%, signal=33%	1051/6422/64093/3570/2824/22943/1021/56975/8326/3091/6662/4057/650/1230/4851/5727/5552/7124/56172/7474/144347/4921/7042/5734/6664/3569/50964/4256/117581/9770/655/1435/130497/6591/9249/26585/860/57154/654/1052/10507/6348/3491/6546/115908/5587/83999/197/5027/90/196527/4091/4146/4208/9759/3199/8626/22856/9464/2185/1499/8519/5594/4041/92
MF	GO:0030414	peptidase inhibitor activity	134	0.313071	1.79823	0.00117786	0.011147	0.00739296	4434	tags=54%, list=36%, signal=35%	5918/6590/5266/144568/330/8740/25816/710/27151/1476/5271/135228/4057/5268/114769/26998/5270/6318/6197/351/5272/718/440068/5055/9806/1475/6317/89777/8434/329/1285/199713/8710/5265/2597/2/8530/871/183/51377/5627/1474/51050/89932/6622/1447/6690/5273/89766/7077/939/57119/128488/197/90199/404203/56925/831/7021/5858/27344/7980/284293/3273/7035/140902/51232/286204/5973/5275/5345/5176/3698
BP	GO:0033002	muscle cell proliferation	134	0.423885	2.43472	0.00117786	0.011147	0.00739296	4071	tags=60%, list=33%, signal=41%	6648/8837/1956/7052/1906/10135/3570/6376/2296/3600/5743/3592/2950/7128/10257/6934/284/5031/4851/4217/2047/2627/6502/2069/57057/10413/2247/7124/6352/5292/3486/4883/3606/5724/7042/3654/3569/7046/4856/60485/205428/2303/10891/3776/6774/9510/57447/183/4211/3458/6772/5467/1482/8013/1839/2254/3586/199/3593/4318/7049/10221/3596/231/3162/5739/79647/347/7472/4208/1535/9759/84466/5591/7048/1499/5594/3248/71…
BP	GO:0036294	cellular response to decreased oxygen levels	132	0.323709	1.8575	0.00117786	0.011147	0.00739296	1761	tags=30%, list=14%, signal=26%	3383/8837/1906/6422/10135/2023/768/3091/5743/677/23198/30001/114769/112399/4851/2627/6285/5163/5698/27087/27063/5562/54583/10397/2034/114990/3654/57103/1536/79723/9475/571/205/10891/3776/3779/6326/5690/5230
BP	GO:0038093	Fc receptor signaling pathway	134	0.327971	1.88381	0.00117786	0.011147	0.00739296	4050	tags=49%, list=33%, signal=34%	4067/4651/4690/5284/7525/5336/23198/60/10096/5698/3815/5588/26253/5295/2268/10095/338339/10892/10092/961/5788/3937/3071/7456/3984/2207/9844/3702/9402/2213/3055/5690/919/917/695/23118/10109/5696/7409/2534/8013/2214/2210/7454/131450/2212/10097/6654/5290/4775/84433/5713/10006/2209/5906/5534/5692/7462/5708/64005/6850/27040/10787/5594/2889/5338
BP	GO:0045619	regulation of lymphocyte differentiation	132	0.478414	2.74523	0.00117786	0.011147	0.00739296	3017	tags=58%, list=24%, signal=44%	57115/6422/301/864/8767/8876/3600/3574/3592/677/8808/286410/3718/8651/3965/3559/678/941/9308/56833/150372/100/9760/5771/3575/972/3659/10288/64115/114771/3606/4860/942/3662/3566/10892/1378/604/1540/5788/3071/1493/11006/3594/56603/639/8744/3149/3635/914/54440/149233/3902/30009/865/940/3458/50943/695/10385/729230/115352/22806/2175/114548/257101/6654/4323/5896/3111/23240/84433/10875/101/939/9840
BP	GO:0046328	regulation of JNK cascade	132	0.383212	2.19894	0.00117786	0.011147	0.00739296	4173	tags=56%, list=34%, signal=38%	1956/140885/10333/1906/6422/84451/59341/22943/8767/197259/26191/2950/6386/9258/26525/4217/2047/8792/64127/7164/3553/351/7124/56940/64170/7474/10913/4317/8324/6317/29969/653361/1540/10392/6504/9448/2150/2213/221472/5911/389432/153090/8600/9770/22881/153769/11184/1236/959/1647/1490/2043/344558/939/5048/57216/23236/23043/7098/7476/7099/9839/54106/23328/64853/6788/6850/6363/2185/10371/2889/51776/3557…
BP	GO:0048002	antigen processing and presentation of peptide antigen	134	0.322713	1.85361	0.00117786	0.011147	0.00739296	3896	tags=48%, list=31%, signal=33%	3112/1520/23198/3108/3134/6891/4688/6890/5698/5641/3133/1515/3106/972/567/3122/3109/6556/653361/1536/10437/1514/3105/2207/3123/83547/2213/5690/3117/30835/3902/50856/4689/55016/3113/1509/50489/811/5696/130340/1780/6712/2210/55080/3107/3111/3077/3127/8905/5713/3120/3119/2209/3115/162/5692/3135/5708/81930/6892/1535/11004/3685/1510
BP	GO:0051224	negative regulation of protein transport	132	0.341699	1.96073	0.00117786	0.011147	0.00739296	2628	tags=38%, list=21%, signal=30%	27242/2633/10333/6422/301/6376/7850/26191/84830/7128/284/55612/26525/114769/5371/353514/5552/3553/7447/55432/7124/9466/440068/131177/5734/91543/8724/29969/4856/199713/10859/9448/79651/2150/51311/51465/2213/3418/7114/50943/308/10385/51715/9647/11060/28984/131450/307/114548/55024
MF	GO:0061135	endopeptidase regulator activity	132	0.308361	1.76943	0.00117786	0.011147	0.00739296	2709	tags=36%, list=22%, signal=29%	5918/6590/5266/144568/330/8740/25816/710/27151/1476/5271/135228/4057/5268/114769/26998/5270/6318/6197/351/5272/718/440068/64115/5055/9806/1475/6317/89777/8434/329/1285/199713/8710/5265/2597/2/8530/871/183/51377/5627/1474/89932/6622/1447/6690/5273
BP	GO:2000377	regulation of reactive oxygen species metabolic process	134	0.329119	1.8904	0.00117786	0.011147	0.00739296	3995	tags=52%, list=32%, signal=36%	3383/445/59272/8837/1956/64581/140885/10333/1906/1545/5806/9263/1410/3091/5743/2950/5873/3553/8838/7124/10516/3689/90527/4317/2358/57103/961/9475/329/55022/6774/4314/2150/730249/683/7498/55532/3684/225/183/9474/2643/3458/5880/655/2534/5740/6622/405753/1647/9104/3586/2308/22914/199/5165/4780/384/7099/493/7305/1535/9759/8644/215/6850/2185/2305/7048/1401
BP	GO:0002695	negative regulation of leukocyte activation	133	0.527056	3.02618	0.00117925	0.011147	0.00739296	3749	tags=68%, list=30%, signal=48%	1051/27242/4067/57115/79679/6422/301/6376/5621/864/57162/3620/3958/26191/80380/51083/7128/2267/3718/8651/3965/53833/3134/3559/941/634/671/10457/5771/11314/972/3659/201633/10288/56940/64115/114771/29126/942/3566/6664/604/84174/5788/1493/10859/54900/3149/2213/3635/84868/8530/6693/3902/30009/865/6375/4332/8832/50943/695/11326/284021/64092/10385/729230/9750/284467/55024/10461/26279/55824/79626/472/23…
BP	GO:0019362	pyridine nucleotide metabolic process	131	0.318147	1.82471	0.00118064	0.011147	0.00739296	3882	tags=48%, list=31%, signal=33%	8942/5214/8564/10135/2023/5465/3620/54541/3091/5743/5236/11182/53632/4907/5208/5209/351/4199/2327/952/4837/5562/3939/3101/7086/57103/283209/169355/10891/6774/195827/2597/683/3356/5230/3418/3458/23498/80201/2646/51660/9688/5315/5740/51071/55276/7167/5160/22934/9631/8514/23279/9563/5027/4200/83666/6120/2326/53371/9759/10762/55706/160728
CC	GO:0031225	anchored component of membrane	130	0.337562	1.9368	0.00118064	0.011147	0.00739296	2727	tags=39%, list=22%, signal=31%	1946/55350/154064/5621/2348/966/79465/8875/56963/419/5329/8876/80328/161357/80329/135228/353091/8581/4241/10232/4061/4907/66004/2619/1945/929/284348/54742/8434/1604/5314/914/683/962/51299/53942/100133941/249/250/133121/8000/360226/349633/6997/2352/1043/1942/2676/116372/83886/8482
BP	GO:0046496	nicotinamide nucleotide metabolic process	131	0.318147	1.82471	0.00118064	0.011147	0.00739296	3882	tags=48%, list=31%, signal=33%	8942/5214/8564/10135/2023/5465/3620/54541/3091/5743/5236/11182/53632/4907/5208/5209/351/4199/2327/952/4837/5562/3939/3101/7086/57103/283209/169355/10891/6774/195827/2597/683/3356/5230/3418/3458/23498/80201/2646/51660/9688/5315/5740/51071/55276/7167/5160/22934/9631/8514/23279/9563/5027/4200/83666/6120/2326/53371/9759/10762/55706/160728
BP	GO:0061138	morphogenesis of a branching epithelium	130	0.31739	1.82106	0.00118064	0.011147	0.00739296	4269	tags=52%, list=34%, signal=35%	157506/133/4233/7052/1906/6422/1969/3371/6662/6768/5629/650/7475/2119/5371/4851/5727/6608/57057/10413/2247/7124/7490/7474/5361/284217/9021/2303/6663/84870/30812/1522/183/9723/2252/10253/4040/10481/655/340419/1435/6591/8829/6722/4323/2297/3237/3586/23213/57216/90/1739/2668/64783/7472/2736/8626/7080/7048/1499/10371/1950/4041/4070/59277/3845/3202/3239
CC	GO:0030666	endocytic vesicle membrane	128	0.350062	2.00356	0.00118483	0.011147	0.00739296	3446	tags=48%, list=28%, signal=35%	7097/10333/7096/8685/306/23432/338382/7475/3134/6891/5727/6608/6890/55647/3133/817/3106/972/81029/50617/10981/567/9332/7474/3122/6556/1536/3105/3123/8301/83547/3920/1755/51762/9367/3117/9474/23149/3113/5880/50489/811/51715/815/11151/2210/3107/84329/1839/339122/949/3127/3120/3119/2209/3115/7306/6233/79971/7476/3135
BP	GO:0060759	regulation of response to cytokine stimulus	128	0.442778	2.53421	0.00118483	0.011147	0.00739296	2259	tags=42%, list=18%, signal=35%	11240/7097/3459/3455/834/1906/8767/837/7850/3091/330/3574/2950/7128/284/8651/3656/4321/26525/114769/84166/7132/7124/7852/3460/5771/64135/972/6352/90268/25939/11213/8877/81030/9641/7474/3654/3569/3554/9021/6868/1540/5788/329/2150/2672/100133941/865/7185/3458/6772/54625/7294/6091
BP	GO:0071347	cellular response to interleukin-1	128	0.489666	2.80257	0.00118483	0.011147	0.00739296	2483	tags=46%, list=20%, signal=37%	1051/3383/1116/3934/2633/6364/140885/2244/3556/3576/1906/8564/6422/6376/2266/57162/8767/2634/7850/3091/6662/6347/8808/23198/3656/6355/10010/64127/3553/5698/27063/6354/6352/6362/11213/6351/3654/6357/3569/3554/961/6367/199713/10392/3037/6369/730249/3552/9705/5690/91807/6375/23118/6846/4615/153090/5696/1244/1326
BP	GO:0000187	activation of MAPK activity	118	0.352224	1.98719	0.00118906	0.011147	0.00739296	2317	tags=37%, list=19%, signal=31%	55765/136/84451/8767/1852/197259/23566/6288/650/3656/4217/9294/64127/3553/3815/238/2247/7124/284340/7852/5562/972/5063/1139/7474/1849/3654/29969/60675/5788/200958/3084/5606/10392/255324/7039/3735/23118/2357/153090/8600/5608/6997/51196
BP	GO:0001659	temperature homeostasis	118	0.326661	1.84297	0.00118906	0.011147	0.00739296	4080	tags=51%, list=33%, signal=34%	1051/3934/3600/5743/79054/133522/1907/23175/8809/57561/4851/8792/3553/7124/7852/26291/4883/2034/3606/3662/3566/2171/2887/6868/51316/2180/2303/10891/6774/3552/3356/11096/33/4923/23228/8600/5608/1734/3226/729230/2827/1666/5746/2308/8929/5565/2271/7099/3596/85440/6009/63976/51393/6850/10062/7253/50486/468/7030/338557
BP	GO:0001959	regulation of cytokine-mediated signaling pathway	118	0.462093	2.60705	0.00118906	0.011147	0.00739296	2259	tags=44%, list=18%, signal=36%	11240/3459/3455/834/1906/8767/837/7850/3091/330/3574/2950/7128/284/8651/3656/4321/26525/114769/84166/7132/7124/7852/3460/5771/972/6352/90268/25939/11213/8877/81030/9641/7474/3654/3569/3554/9021/6868/1540/5788/329/2150/2672/100133941/865/7185/3458/6772/54625/7294/6091
MF	GO:0008236	serine-type peptidase activity	122	0.327108	1.85261	0.00118906	0.011147	0.00739296	3307	tags=43%, list=27%, signal=32%	59342/4316/54933/715/716/1075/3426/5653/6768/8492/260429/84000/4057/7113/51279/5655/283471/3002/5646/10279/5650/717/3816/25818/1803/4317/11202/4312/255738/4314/64699/54504/360226/5328/3001/203100/9159/3026/5550/26085/83886/284366/101/49/43847/5651/4318/11012/5648/203074/2999/346702
BP	GO:0010950	positive regulation of endopeptidase activity	122	0.403049	2.28271	0.00118906	0.011147	0.00739296	3687	tags=53%, list=30%, signal=38%	6280/4067/6279/64581/834/355/3428/8767/837/9966/64065/1612/3965/112399/5371/4217/9447/5641/7124/637/8797/64115/64170/10892/6317/2904/1378/3932/444/8795/9475/1285/10392/1611/6774/8301/9705/7498/58484/356/8743/843/838/1509/6091/2534/4210/9647/10017/1942/114548/6622/1490/2043/3491/55081/55122/668/2903/4155/885/9141/9994/54205/841
BP	GO:0060401	cytosolic calcium ion transport	122	0.322127	1.8244	0.00118906	0.011147	0.00739296	3948	tags=52%, list=32%, signal=36%	4067/55503/6376/5621/84959/1756/23007/5336/57158/30001/5371/5031/79041/3627/2247/817/5144/255231/6263/2904/1234/3932/6373/5788/6261/1729/3356/920/4923/356/22821/9474/6375/5026/9472/51196/55636/4283/22953/2534/11151/930/6622/1236/1490/6348/931/55013/6546/1193/2903/55151/23236/5027/5330/56704/3596/493/6262/1535/6363/4976/2185/2280
BP	GO:0071706	tumor necrosis factor superfamily cytokine production	118	0.470588	2.65498	0.00118906	0.011147	0.00739296	2147	tags=45%, list=17%, signal=38%	7097/3929/5005/3459/5004/64581/140885/6376/7096/8767/26191/2950/7128/4057/284/3965/353514/64127/351/3133/671/10457/64135/9466/5295/11213/23643/64115/64170/29126/1139/7474/942/5724/4317/929/961/1536/5788/943/10859/10392/6504/2207/51465/914/84868/54440/2841/6693/50856/3458/50943
BP	GO:1902107	positive regulation of leukocyte differentiation	118	0.441516	2.49096	0.00118906	0.011147	0.00739296	3835	tags=60%, list=31%, signal=42%	301/864/8767/146433/8876/3600/3976/5578/3574/3592/677/133522/8808/1230/286410/8651/3965/5457/3559/941/9308/7124/100/9760/3575/972/10288/64115/3606/4860/942/3566/10892/604/1540/5788/3071/11006/3594/8744/3635/133308/54440/920/149233/865/3458/50943/695/2124/8600/10385/1435/3059/114548/4323/5896/101/939/9840/3593/7071/9655/10221/3135/7535/841/7305/2736/6850/6363
MF	GO:0008201	heparin binding	127	0.362244	2.06593	0.00119048	0.011147	0.00739296	4527	tags=60%, list=36%, signal=38%	4316/9982/6422/9508/9388/3918/6288/4057/6372/6355/9289/5727/5270/3627/351/8838/2247/59352/5197/6649/10457/6354/8828/26577/6373/4856/50964/59271/5788/10563/9510/84870/11096/5549/3068/2252/51144/308/6402/655/340419/307/8829/26279/4353/1839/2254/1490/3491/284654/51816/5048/83716/3075/11167/7049/5792/9141/56925/2335/6368/7705/64388/53834/3990/3273/343637/5764/89797/10178/200879/26/7058/5322/2246/1305
BP	GO:0022408	negative regulation of cell-cell adhesion	127	0.498832	2.8449	0.00119048	0.011147	0.00739296	2905	tags=56%, list=23%, signal=43%	1051/27242/445/79679/301/5621/2266/864/59341/57162/5465/84959/3620/3958/26191/80380/5962/84830/2267/650/3718/23075/8651/53827/3965/53833/3559/5270/941/634/10457/5771/11314/972/3659/201633/10288/56940/64115/29126/942/3566/604/1493/10859/54900/2213/84868/6693/3902/30009/865/6375/114897/50943/11326/10385/9750/9647/6591/28984/26279/80709/55824/79626/654/23240/3077/10875/4771/3586
BP	GO:0048017	inositol lipid-mediated signaling	119	0.322378	1.82142	0.00119048	0.011147	0.00739296	2685	tags=39%, list=22%, signal=31%	5337/4067/1956/1906/118788/23007/6662/677/5293/5336/284/5270/634/3815/7124/23413/6352/5295/4883/5156/3606/2268/5724/7042/5008/653361/205428/5288/2150/3356/183/10870/940/5294/153090/5467/51196/1436/10385/867/2534/23533/59338/3059/57605/5290
BP	GO:0070304	positive regulation of stress-activated protein kinase signaling cascade	126	0.406939	2.31848	0.00119048	0.011147	0.00739296	3946	tags=56%, list=32%, signal=39%	4281/55765/4067/10333/1906/84451/59341/22943/8767/197259/6386/650/9258/26525/4217/8792/64127/7164/3553/351/7124/56940/8877/64170/7474/10913/4317/8324/7042/29969/653361/10392/6504/2150/2213/7498/221472/3735/389432/153090/8600/9770/22881/153769/55801/11184/1236/959/1647/1490/2043/344558/939/57216/5610/23236/23043/392255/7098/7476/7099/9839/54106/23328/11235/6788/6850/6363/9464/2185/10371
BP	GO:1904018	positive regulation of vasculature development	127	0.384977	2.19557	0.00119048	0.011147	0.00739296	1714	tags=33%, list=14%, signal=29%	6648/1116/133/8837/3576/9982/301/3570/6376/1545/7101/3696/3091/5578/5743/306/51129/4851/2627/3553/634/3815/694/2247/7852/718/3689/2113/10000/8877/1139/7474/958/27161/1536/2303/8710/6774/6271/6369/5579/3552
BP	GO:0002822	regulation of adaptive immune response based on somatic recombination of immune receptors built from immunoglobulin superfamily domains	114	0.500782	2.81028	0.0011919	0.011147	0.00739296	2599	tags=55%, list=21%, signal=44%	722/301/3570/7037/8767/3592/7128/3718/5817/53833/200558/10673/3134/8809/941/3553/634/3133/7124/100/5588/3575/3106/9466/718/567/56940/3606/29126/3566/10892/958/10666/91543/1378/3569/6556/3554/604/5788/7133/10859/4049/3105/3594/2207/2213/84868/54440/920/149233/725/30009/6375/940/50943/695/51571/909/729230/7454/3107/114548
BP	GO:0051897	positive regulation of protein kinase B signaling	114	0.368437	2.06759	0.0011919	0.011147	0.00739296	2858	tags=46%, list=23%, signal=36%	1116/4233/1956/23551/6376/118788/5293/9542/6934/2651/9258/284/10855/941/3815/2069/2247/7124/29851/5295/5156/3606/942/5008/3932/7046/1646/3084/255324/7039/2252/10253/2250/114897/940/5294/57462/5880/8600/7409/2534/50852/23533/55801/85453/3059/3688/930/5290/1236/1839/2254/6348
BP	GO:0097696	STAT cascade	114	0.382899	2.14875	0.0011919	0.011147	0.00739296	3443	tags=49%, list=28%, signal=36%	116379/4067/3455/9111/3570/1545/3600/3976/3592/6347/3718/8651/4851/3815/3588/7132/7124/5771/3575/11314/6352/3606/958/5008/3569/9021/5788/6775/338376/6774/3587/149233/1437/183/3458/6772/54625/1436/729230/2534/55801/3059/51379/6773/1443/4771/3586/3066/2688/133396/3593/9655/59067/3596/83666/231
BP	GO:1903555	regulation of tumor necrosis factor superfamily cytokine production	114	0.484114	2.71674	0.0011919	0.011147	0.00739296	3835	tags=63%, list=31%, signal=44%	7097/3929/5005/3459/5004/64581/140885/6376/7096/8767/26191/2950/7128/4057/284/3965/353514/64127/351/3133/671/10457/64135/9466/5295/11213/23643/64115/64170/29126/1139/7474/942/5724/4317/929/961/1536/5788/943/10859/10392/6504/2207/51465/914/84868/54440/2841/6693/50856/3458/50943/55773/729230/945/6348/3586/3066/101/9181/3593/384/7098/7099/54106/7305/5443/1535/54206/6850/6363
BP	GO:2001236	regulation of extrinsic apoptotic signaling pathway	114	0.351052	1.97003	0.0011919	0.011147	0.00739296	2581	tags=37%, list=21%, signal=29%	3383/8837/2244/6422/355/6376/2266/81618/3958/3574/85450/2950/7128/6934/5371/3553/10413/7124/637/467/2243/4170/8797/4118/7046/1540/5788/8795/3552/64114/1437/356/183/147138/7185/8743/51330/8406/2534/11124/6591/8829
BP	GO:0043901	negative regulation of multi-organism process	123	0.327298	1.85654	0.00119332	0.011147	0.00739296	3831	tags=47%, list=31%, signal=33%	6590/5806/3428/5359/3853/7128/4057/5629/6355/114769/5371/302/3559/7124/100/6352/27350/6351/6732/89870/91543/10107/8724/10549/730249/84868/7105/85363/5047/6772/51193/2219/10475/200315/10410/811/6397/286827/57379/4599/8638/51297/6348/10875/6737/5610/140564/384/10221/57829/8780/60489/397/7783/9830/55337/3456/3685
BP	GO:0048771	tissue remodeling	123	0.383564	2.1757	0.00119332	0.011147	0.00739296	2704	tags=41%, list=22%, signal=32%	1956/7052/6422/301/7037/2296/84959/1969/3600/3976/3091/5578/3574/133522/7128/8200/8792/634/79705/952/10457/6696/2034/1945/3606/9290/3569/9475/2303/84870/3552/4982/3635/3200/64114/183/9474/4853/4040/5880/8600/1436/9770/55636/729230/4286/10461/2702/26585/4323
BP	GO:0008360	regulation of cell shape	113	0.329088	1.8393	0.00119474	0.011147	0.00739296	4238	tags=53%, list=34%, signal=35%	3383/4478/301/4651/114793/5962/221061/6347/11135/57194/6285/3815/390/6354/3689/10602/2268/5361/10979/30011/6357/6369/10630/1729/752/221472/3055/9723/23433/10810/171177/1436/54751/57471/2534/11149/54509/11151/56990/5028/10507/6348/54873/1690/4627/121512/55171/445815/7940/161176/391/1739/2335/29780/2185/7168/5764/51177/55843/5365
BP	GO:0032635	interleukin-6 production	113	0.516699	2.88788	0.00119474	0.011147	0.00739296	1757	tags=45%, list=14%, signal=39%	1051/7097/55765/3929/136/5004/64581/140885/10333/3556/3570/6376/7096/59341/8767/26191/338382/824/7128/8808/26525/3965/353514/64127/3553/2069/351/671/7124/64135/9466/972/10288/11213/64170/3606/7474/5724/8807/4317/3569/961/3071/10392/6504/6774/2150/2207/51311/3635/84868
BP	GO:0032640	tumor necrosis factor production	113	0.472673	2.64181	0.00119474	0.011147	0.00739296	2147	tags=45%, list=17%, signal=38%	7097/3929/5005/3459/5004/64581/140885/6376/7096/8767/26191/2950/7128/4057/284/3965/353514/64127/351/3133/671/10457/64135/9466/5295/11213/23643/64115/64170/1139/7474/5724/4317/929/961/1536/5788/943/10859/10392/6504/2207/51465/914/84868/54440/2841/6693/50856/3458/50943
BP	GO:0033209	tumor necrosis factor-mediated signaling pathway	113	0.377942	2.11235	0.00119474	0.011147	0.00739296	2305	tags=37%, list=19%, signal=31%	834/837/9966/330/8740/2950/3604/7128/23198/114769/3987/10673/9447/8792/5698/7132/7124/5771/90268/8877/10913/958/6868/1540/329/943/7133/4049/9020/2150/8744/4982/9705/5690/3735/970/7185/7114/6772/51330/8600/5696
BP	GO:0002706	regulation of lymphocyte mediated immunity	121	0.510974	2.88716	0.00119617	0.011147	0.00739296	2599	tags=57%, list=21%, signal=46%	722/154064/7037/79465/3592/80328/80329/353091/5817/3965/53833/200558/3134/8809/6318/3553/634/5272/3133/7124/3575/3106/9466/718/135250/567/56940/3606/8807/10892/958/10666/91543/1378/3569/3554/604/10225/5788/7133/10859/3805/4049/3105/3594/2207/114836/2213/84868/54440/9437/149233/725/3902/30009/6375/4068/940/50943/695/51571/23705/7409/909/729230/7454/3107/56253/114548
BP	GO:0038061	NIK/NF-kappaB signaling	121	0.416394	2.35275	0.00119617	0.011147	0.00739296	3541	tags=49%, list=28%, signal=35%	1116/7097/1956/10333/1906/9966/26191/330/8740/9516/23198/222487/3965/3987/8809/64127/3553/5698/238/351/7124/8797/8877/3606/9641/10913/5971/4317/10892/3654/929/4856/1540/8795/329/10392/9020/84868/5690/7105/7114/389432/4791/811/5696/9770/655/114548/939/192669/5713/3593/5610/5692/7098/7099/5708/54106/23328
CC	GO:0070820	tertiary granule	121	0.473753	2.67685	0.00119617	0.011147	0.00739296	3668	tags=64%, list=30%, signal=46%	5337/2919/5004/140885/5912/966/5806/965/3958/10562/1520/1476/5236/4057/53831/634/1265/5317/5646/11314/963/10288/3689/567/23250/23601/126014/5724/4317/338339/2358/3903/1378/6556/961/2495/89777/2204/1536/199675/3071/1604/4069/2207/6515/79895/8836/1828/1729/3920/170482/3684/3608/3687/1823/2357/5328/1509/84658/2352/79930/945/5273/1832/7077/160364/101/8514/8778/4318/8417/23114/196527/374403/10321/2579…
BP	GO:0002819	regulation of adaptive immune response	124	0.495726	2.81366	0.00119904	0.011147	0.00739296	2599	tags=54%, list=21%, signal=43%	722/301/3570/7037/8767/3592/7128/3718/5817/53833/200558/10673/3134/8809/113/941/3553/634/3133/7124/100/5588/3575/3106/9466/3659/718/567/56940/3606/29126/3566/10892/958/10666/91543/1378/3569/6556/3554/604/5788/7133/10859/4049/3105/3594/2207/2213/84868/54440/962/920/149233/725/30009/6375/940/50943/695/51571/64092/909/729230/7454/3107/114548
BP	GO:0007259	JAK-STAT cascade	110	0.391487	2.1808	0.00119904	0.011147	0.00739296	3443	tags=50%, list=28%, signal=36%	116379/4067/3455/9111/3570/1545/3600/3976/3592/6347/3718/8651/4851/3815/3588/7132/7124/5771/11314/6352/3606/958/5008/3569/9021/5788/6775/338376/6774/3587/149233/1437/183/3458/6772/54625/1436/729230/2534/55801/3059/51379/6773/1443/4771/3586/3066/2688/133396/3593/9655/59067/3596/83666/231
BP	GO:0030203	glycosaminoglycan metabolic process	110	0.341043	1.89979	0.00119904	0.011147	0.00739296	2039	tags=31%, list=16%, signal=26%	9469/10331/93010/57115/10402/2296/3600/50515/9957/9435/9334/2651/284/10855/2131/3553/27087/2247/29940/83539/55790/5292/4166/6382/114771/9806/2132/90161/3037/5549/411/6383/9672/3038
BP	GO:0032874	positive regulation of stress-activated MAPK cascade	125	0.401851	2.28246	0.00119904	0.011147	0.00739296	4173	tags=58%, list=34%, signal=39%	4281/55765/10333/1906/84451/59341/22943/8767/197259/6386/650/9258/26525/4217/8792/64127/7164/3553/351/7124/56940/8877/64170/7474/10913/4317/8324/7042/29969/653361/10392/6504/2150/2213/7498/221472/3735/389432/153090/8600/9770/22881/153769/55801/11184/1236/959/1647/1490/2043/344558/939/57216/5610/23236/23043/392255/7098/7476/7099/9839/54106/23328/11235/6788/6850/6363/9464/2185/10371/51776/3557/9175
BP	GO:0042129	regulation of T cell proliferation	124	0.541809	3.07522	0.00119904	0.011147	0.00739296	3998	tags=73%, list=32%, signal=50%	1051/27242/8440/79679/301/3570/5621/7037/4690/57162/3620/8767/3600/3958/80380/3592/3718/3965/53833/10673/3559/941/3553/3133/5588/10457/7412/6352/3659/10288/64115/3606/29126/4860/942/3109/3569/5788/7133/3071/1493/1604/10859/3594/8744/923/84868/54440/920/149233/4004/30835/6693/970/100133941/916/6375/940/50943/3113/5880/11326/10385/729230/11151/11148/26279/6654/959/126259/944/23240/84433/3586/199/35…
CC	GO:0042581	specific granule	124	0.484094	2.74764	0.00119904	0.011147	0.00739296	3831	tags=65%, list=31%, signal=46%	1116/3934/6590/5337/5005/2919/5004/5912/966/5806/6518/5329/306/10562/4057/222487/53831/5873/10855/634/1265/671/10857/963/3689/8560/567/23250/23601/126014/1794/4317/338339/2358/3903/23071/961/2204/1536/10970/199675/7133/4069/8566/6515/79895/8836/683/3684/3608/64114/353189/1522/5328/1509/2352/7414/1084/945/3683/84329/221/7077/160364/101/8514/10043/5906/196527/55754/719/10321/25797/121260/25852/4973…
BP	GO:0060402	calcium ion transport into cytosol	110	0.346003	1.92742	0.00119904	0.011147	0.00739296	3509	tags=51%, list=28%, signal=37%	4067/55503/6376/5621/84959/1756/23007/5336/57158/30001/5371/5031/79041/3627/2247/817/5144/255231/6263/2904/1234/3932/6373/5788/6261/1729/3356/920/4923/356/22821/9474/6375/5026/9472/51196/55636/4283/22953/2534/11151/930/6622/1236/6348/931/6546/1193/2903/55151/23236/5027/5330/56704/3596/493
BP	GO:0071456	cellular response to hypoxia	125	0.332853	1.89056	0.00119904	0.011147	0.00739296	1761	tags=30%, list=14%, signal=26%	3383/8837/1906/6422/2023/768/3091/5743/677/23198/30001/114769/112399/4851/2627/6285/5163/5698/27087/27063/5562/54583/10397/2034/114990/3654/57103/1536/79723/9475/571/205/10891/3776/3779/6326/5690/5230
BP	GO:1903034	regulation of response to wounding	125	0.338405	1.92209	0.00119904	0.011147	0.00739296	2386	tags=34%, list=19%, signal=28%	4067/64581/2244/1906/301/2266/84959/56963/5329/5578/84830/710/7128/135228/10855/302/3640/5270/634/2247/5588/7852/6696/2243/158376/5156/5055/5341/50506/4638/23189/11202/2303/2150/2207/10630/89790/114897/51330/5328/308/5467/5627
BP	GO:0002526	acute inflammatory response	116	0.481893	2.70059	0.00120048	0.011147	0.00739296	3519	tags=62%, list=28%, signal=45%	1051/3383/445/9180/3929/5005/6279/722/5004/715/3570/716/966/5359/8876/3426/5743/710/6288/2950/6289/54210/53833/8792/6291/3553/3133/7124/7412/718/717/9332/1379/5008/1378/3569/145741/1604/1380/6774/2207/5265/923/2213/3552/91807/2/725/695/5294/11326/8600/732/5627/2683/54658/23780/114548/930/1236/728/3077/3078/101/197/3075/90/712/388125/196527/719/714
BP	GO:0002831	regulation of response to biotic stimulus	109	0.37138	2.06414	0.00120048	0.011147	0.00739296	4134	tags=56%, list=33%, signal=38%	6376/8767/3600/5578/330/3592/115004/7128/4064/4057/6372/4321/5817/114769/10133/9447/3559/3553/634/5650/23643/29126/25818/57103/89870/10666/329/1604/10859/10392/3594/2150/730249/84868/7105/85363/149233/10758/6772/10475/6397/56253/654/10875/51191/7187/3593/384/10221/8780/338322/83666/60489/23328/151636/1535/23208/246778/3273/117854/340061
BP	GO:0003018	vascular process in circulatory system	116	0.371297	2.0808	0.00120048	0.011147	0.00739296	2314	tags=34%, list=19%, signal=28%	6648/59342/3383/59272/133/136/1956/2244/1906/2266/2296/59341/5997/5743/7525/284/1907/2982/634/952/2243/80005/3269/5724/9475/145741/2303/3779/2150/3356/91807/80852/219537/183/9474/2643/9732/1131/553/5467
MF	GO:0008083	growth factor activity	109	0.348606	1.93756	0.00120048	0.011147	0.00739296	4095	tags=52%, list=33%, signal=35%	2919/3570/22943/146433/2256/3976/3574/3592/9542/650/8200/8190/2069/8838/2247/26291/651/7042/5008/3569/4856/3084/255324/346389/4909/3068/2202/7039/1437/183/2252/2250/6997/655/1435/1443/1839/656/2254/654/1490/3586/51816/2688/3593/1890/392255/649/2668/734/5967/4902/7044/7873/1950/2821/9535
BP	GO:0031424	keratinization	109	0.422488	2.3482	0.00120048	0.011147	0.00739296	3128	tags=47%, list=25%, signal=35%	1001/25984/3868/5266/3855/23581/3854/3887/3853/1824/9333/64065/1825/6768/643414/1830/3872/286887/3866/125115/3852/3857/9119/5493/5317/3851/25818/1475/5318/3889/7051/56603/1828/3861/390792/3713/196374/730755/1823/3849/81851/1829/83895/26085/1832/3885/100505753/121391/374454/43847/643418
BP	GO:0045580	regulation of T cell differentiation	109	0.459154	2.55199	0.00120048	0.011147	0.00739296	3944	tags=66%, list=32%, signal=45%	301/864/8767/8876/3600/3574/3592/8808/3718/8651/3965/3559/941/9308/100/5771/3575/972/3659/10288/64115/3606/4860/942/3662/3566/10892/1378/604/1540/5788/3071/1493/11006/3594/56603/639/8744/914/54440/149233/3902/30009/865/940/3458/50943/10385/729230/2175/114548/257101/6654/5896/3111/23240/84433/10875/101/939/9840/3593/9655/3135/1840/7535/2736/6850/3456/6363/7048/246778
BP	GO:0006022	aminoglycan metabolic process	117	0.328022	1.8398	0.00120192	0.011147	0.00739296	2039	tags=30%, list=16%, signal=25%	84002/9469/10331/93010/57115/10402/2296/3600/50515/9957/9435/9334/2651/284/10855/2131/3553/27087/2247/29940/83539/55790/5292/4166/6382/114771/9806/2132/90161/3037/5549/411/6383/9672/3038
BP	GO:0048015	phosphatidylinositol-mediated signaling	117	0.31685	1.77713	0.00120192	0.011147	0.00739296	2685	tags=38%, list=22%, signal=30%	4067/1956/1906/118788/23007/6662/677/5293/5336/284/5270/634/3815/7124/23413/6352/5295/4883/5156/3606/2268/5724/7042/5008/653361/205428/5288/2150/3356/183/10870/940/5294/153090/5467/51196/1436/10385/867/2534/23533/59338/3059/57605/5290
BP	GO:0002700	regulation of production of molecular mediator of immune response	108	0.422579	2.34384	0.00120337	0.011147	0.00739296	2905	tags=52%, list=23%, signal=40%	7037/115004/51704/3718/284/353091/200558/3134/8809/64127/3553/3133/7124/5650/9466/972/11213/567/3606/25818/7474/3566/10892/958/7042/10666/91543/3569/3554/604/10225/5788/7133/10859/51744/3805/2150/2207/2213/54440/3735/9474/30009/6375/940/50943/695/729230/115352/8013/114548/9188/8482/959/3077/3586
BP	GO:0002705	positive regulation of leukocyte mediated immunity	108	0.477662	2.64935	0.00120337	0.011147	0.00739296	2637	tags=54%, list=21%, signal=43%	136/154064/7037/79465/3592/80328/80329/353091/5817/3134/8809/64127/3553/3133/7124/3106/718/135250/3689/567/3606/2268/5724/8807/3566/10892/958/10666/91543/3569/3554/1394/5788/3805/4049/3105/3594/2150/2207/114836/54440/3684/149233/3902/30009/6375/4068/940/50943/695/51571/23705/7409/909/3107/56253/114548/9188
MF	GO:0004252	serine-type endopeptidase activity	111	0.338573	1.88791	0.00120337	0.011147	0.00739296	3307	tags=44%, list=27%, signal=33%	4316/54933/715/716/1075/3426/5653/6768/8492/260429/84000/4057/7113/51279/5655/283471/3002/5646/5650/717/3816/25818/1803/4317/11202/4312/255738/4314/64699/360226/5328/3001/203100/9159/3026/5550/26085/83886/284366/101/49/43847/5651/4318/11012/5648/203074/2999/346702
CC	GO:0005766	primary lysosome	115	0.373966	2.09239	0.00120337	0.011147	0.00739296	3811	tags=52%, list=31%, signal=37%	11240/5005/23200/1075/8876/10577/5284/11010/6278/6386/154664/201294/302/4257/671/150372/718/81567/6317/2171/10970/51316/4069/968/8836/3920/411/353189/25798/4332/25801/2357/2760/10487/2683/79888/10097/6036/4353/1650/84061/2665/4033/2512/51816/1727/10043/55313/8417/2588/55754/719/9588/4125/5611/56729/6836/2444/23593/5834
MF	GO:0015293	symporter activity	115	0.327754	1.83383	0.00120337	0.011147	0.00739296	2189	tags=31%, list=18%, signal=26%	11254/154091/10568/6564/64078/6523/6530/11182/85414/83959/6566/6557/84879/6511/9154/84561/28968/10991/6538/388662/8884/6565/120103/9194/6507/8273/57210/9197/206358/123041/6534/51296/6581/55117/6536/9123
BP	GO:0030168	platelet activation	111	0.339943	1.89555	0.00120337	0.011147	0.00739296	2850	tags=40%, list=23%, signal=31%	4067/2244/2266/5912/84959/5359/5578/6288/5336/60/5270/634/1608/5197/5588/2243/5295/5156/5341/958/3569/3932/2316/3937/2207/10630/5579/83706/114897/10627/5294/7409/7414/8323/2534/23533/6722/10461/5290/2769/959/5028/151/160851
BP	GO:0030260	entry into host cell	108	0.450371	2.49798	0.00120337	0.011147	0.00739296	3230	tags=52%, list=26%, signal=39%	3383/9076/59272/4233/1956/1525/3576/7037/5806/1969/3853/5817/3965/7113/941/4340/7852/972/3694/858/3695/50848/1803/942/23601/6317/1234/1378/10107/8724/5818/1604/1380/3839/6504/3356/85363/920/1508/30835/4360/51193/2219/10475/10410/867/11060/3688/286827/81607/949/2838/4864/6737/6404/3690
BP	GO:0031960	response to corticosteroid	108	0.328626	1.82273	0.00120337	0.011147	0.00739296	3250	tags=41%, list=26%, signal=30%	3383/445/9076/133/114907/6715/8837/1956/1906/301/54541/5743/677/2950/133522/306/8061/4851/678/6285/7124/1515/6382/5066/5724/3569/1536/11170/249/2692/3651/1244/54658/218/654/1490/6753/2706/3586/2308/199/11063/10076/5069
BP	GO:0032675	regulation of interleukin-6 production	108	0.518347	2.87501	0.00120337	0.011147	0.00739296	1757	tags=45%, list=14%, signal=39%	1051/7097/55765/3929/136/5004/64581/140885/10333/3556/3570/6376/7096/59341/8767/26191/338382/824/7128/8808/26525/3965/353514/64127/3553/2069/351/671/7124/64135/9466/972/10288/11213/64170/7474/5724/4317/3569/961/3071/10392/6504/6774/2150/2207/51311/3635/84868
BP	GO:0032680	regulation of tumor necrosis factor production	111	0.47887	2.67022	0.00120337	0.011147	0.00739296	2147	tags=46%, list=17%, signal=38%	7097/3929/5005/3459/5004/64581/140885/6376/7096/8767/26191/2950/7128/4057/284/3965/353514/64127/351/3133/671/10457/64135/9466/5295/11213/23643/64115/64170/1139/7474/5724/4317/929/961/1536/5788/943/10859/10392/6504/2207/51465/914/84868/54440/2841/6693/50856/3458/50943
CC	GO:0042582	azurophil granule	115	0.373966	2.09239	0.00120337	0.011147	0.00739296	3811	tags=52%, list=31%, signal=37%	11240/5005/23200/1075/8876/10577/5284/11010/6278/6386/154664/201294/302/4257/671/150372/718/81567/6317/2171/10970/51316/4069/968/8836/3920/411/353189/25798/4332/25801/2357/2760/10487/2683/79888/10097/6036/4353/1650/84061/2665/4033/2512/51816/1727/10043/55313/8417/2588/55754/719/9588/4125/5611/56729/6836/2444/23593/5834
BP	GO:0044409	entry into host	108	0.450371	2.49798	0.00120337	0.011147	0.00739296	3230	tags=52%, list=26%, signal=39%	3383/9076/59272/4233/1956/1525/3576/7037/5806/1969/3853/5817/3965/7113/941/4340/7852/972/3694/858/3695/50848/1803/942/23601/6317/1234/1378/10107/8724/5818/1604/1380/3839/6504/3356/85363/920/1508/30835/4360/51193/2219/10475/10410/867/11060/3688/286827/81607/949/2838/4864/6737/6404/3690
BP	GO:0045807	positive regulation of endocytosis	108	0.353568	1.96107	0.00120337	0.011147	0.00739296	4001	tags=53%, list=32%, signal=36%	64581/140885/3601/5806/4240/7018/3600/6347/5336/284/5873/302/3553/7124/718/3561/717/567/7474/1794/2358/929/6556/961/5788/3071/10326/255738/2150/2207/2213/55423/636/3458/3560/811/867/1601/57118/6622/10461/26585/26228/3077/197/5906/146722/6401/196527/55646/1535/6850/3685/6363/84251/1950/2889
BP	GO:0046631	alpha-beta T cell activation	111	0.517011	2.8829	0.00120337	0.011147	0.00739296	2657	tags=59%, list=21%, signal=47%	301/3570/864/8767/3600/3592/6932/3718/8651/3965/8809/941/9308/64919/3133/100/5588/11314/3659/64115/3606/29126/4860/942/5971/3662/1794/1880/3566/10892/5734/91543/3569/604/5788/3071/1604/10859/6774/3594/639/3702/114836/54440/149233/2841/6693/30009/916/159296/50856/865/6375/940/3458/50943/60437/2529/4063/5075/8320/2000/729230/114548/257101/26279
BP	GO:0051092	positive regulation of NF-kappaB transcription factor activity	115	0.442512	2.47591	0.00120337	0.011147	0.00739296	3420	tags=55%, list=28%, signal=40%	3383/6280/7097/8837/6279/10333/3556/6376/8767/54101/338382/10346/4057/3656/114769/3965/8809/9447/8792/64127/3553/238/351/7124/4919/5588/3689/11213/8877/3606/7474/8807/10892/958/3654/89870/10392/6283/6774/5579/58484/85363/183/7185/695/23118/10475/4615/4791/8600/815/114548/959/84433/101/23085/9181/5587/5610/8986/6233/7098/7099
BP	GO:0051250	negative regulation of lymphocyte activation	108	0.566723	3.14333	0.00120337	0.011147	0.00739296	2905	tags=65%, list=23%, signal=50%	1051/27242/4067/57115/79679/6422/301/5621/864/57162/3620/3958/26191/80380/51083/7128/2267/3718/8651/3965/53833/3134/3559/941/634/10457/5771/11314/972/3659/201633/10288/56940/64115/114771/29126/942/3566/6664/604/84174/1493/10859/54900/3149/2213/3635/84868/6693/3902/30009/865/6375/4332/50943/695/11326/64092/10385/9750/55024/10461/26279/55824/79626/472/23240/3077/10875/3586
BP	GO:0051806	entry into cell of other organism involved in symbiotic interaction	108	0.450371	2.49798	0.00120337	0.011147	0.00739296	3230	tags=52%, list=26%, signal=39%	3383/9076/59272/4233/1956/1525/3576/7037/5806/1969/3853/5817/3965/7113/941/4340/7852/972/3694/858/3695/50848/1803/942/23601/6317/1234/1378/10107/8724/5818/1604/1380/3839/6504/3356/85363/920/1508/30835/4360/51193/2219/10475/10410/867/11060/3688/286827/81607/949/2838/4864/6737/6404/3690
BP	GO:0051828	entry into other organism involved in symbiotic interaction	108	0.450371	2.49798	0.00120337	0.011147	0.00739296	3230	tags=52%, list=26%, signal=39%	3383/9076/59272/4233/1956/1525/3576/7037/5806/1969/3853/5817/3965/7113/941/4340/7852/972/3694/858/3695/50848/1803/942/23601/6317/1234/1378/10107/8724/5818/1604/1380/3839/6504/3356/85363/920/1508/30835/4360/51193/2219/10475/10410/867/11060/3688/286827/81607/949/2838/4864/6737/6404/3690
BP	GO:0070665	positive regulation of leukocyte proliferation	111	0.529652	2.95338	0.00120337	0.011147	0.00739296	3998	tags=72%, list=32%, signal=49%	4067/8440/79679/301/3570/7037/4690/57162/8767/3600/80380/3574/3592/3718/3965/10673/3559/941/3553/3133/100/5588/952/7412/972/6352/10288/3606/29126/4860/942/1880/958/3109/3569/604/5788/3071/1604/3594/8744/923/683/84868/54440/920/149233/30835/970/100133941/916/6375/940/50943/3113/729230/115352/1435/11151/11148/959/126259/84433/199/3593/3115/57829/7099/59067/3596/7535/54106/4352/4208/6850/6363/7048/1…
BP	GO:0097530	granulocyte migration	111	0.551128	3.07314	0.00120337	0.011147	0.00739296	2858	tags=63%, list=23%, signal=49%	6280/6374/5142/3929/2919/6279/6364/1525/3576/1906/301/6376/59341/30817/2921/3958/6278/6288/6347/5293/6372/2920/6355/26525/1907/3627/56833/3553/284340/5197/5144/11314/6354/255231/972/6352/3689/6362/3269/6351/7042/6357/5734/3554/6373/10563/3071/6367/6283/2207/6369/683/8291/3735/23765/6375/5294/5880/6846/120425/7409/4283/9750/1435/57118/1236/3680/4354/728/6348
BP	GO:1903707	negative regulation of hemopoiesis	115	0.326496	1.82678	0.00120337	0.011147	0.00739296	4221	tags=50%, list=34%, signal=34%	4067/57115/6422/301/864/84959/1021/677/4057/3718/8651/4851/634/11025/5771/972/5295/3659/114771/3566/9290/604/1493/10859/11006/3149/28959/2213/3635/55365/3902/30009/865/4211/50943/4212/29909/23240/6348/10875/9935/4780/9655/55294/10221/7098/7099/3135/1840/714/64783/3456/2185/1499/79577/3707/3202/3205
BP	GO:0045766	positive regulation of angiogenesis	112	0.358501	1.9994	0.00120482	0.011147	0.00739296	3541	tags=47%, list=28%, signal=34%	1116/133/3576/9982/301/6376/1545/7101/3696/3091/5578/5743/306/51129/2627/3553/694/2247/7852/718/3689/2113/10000/8877/1139/7474/958/27161/1536/2303/6774/6271/6369/5579/3552/3687/5315/8829/3688/5740/126259/79805/728/3586/5587/4780/79924/7098/9734/3162/719/26051/23328
BP	GO:0050729	positive regulation of inflammatory response	112	0.512084	2.85596	0.00120482	0.011147	0.00739296	3436	tags=61%, list=28%, signal=44%	1051/6280/9180/7097/3929/6279/136/1956/64581/10333/7052/6376/59341/1075/3620/3600/5743/51704/115362/8792/353514/64127/3553/7132/3133/7124/7941/718/6362/2113/3606/7474/4317/5008/5734/4363/3569/961/145741/4049/6283/2207/6369/923/3735/183/23765/940/695/5294/4615/8600/729230/56670/284467/81793/6622/1236/26228/6348/101/63940/3593/388125/7098/7099/59067/338322
BP	GO:0050777	negative regulation of immune response	112	0.507478	2.83027	0.00120482	0.011147	0.00739296	2229	tags=50%, list=18%, signal=41%	4067/722/57115/9111/301/966/3428/3958/710/7128/3718/284/4321/3965/53833/3134/84166/3559/56833/6318/634/5272/3133/7124/5771/3575/11314/9466/25939/11213/56940/114771/3566/7042/1378/604/10225/5788/1493/1604/10859/3805/730249/2213/3635/84868/2/5133/725/30009/6375/54625/8832/50943/11326/64092
BP	GO:1903317	regulation of protein maturation	90	0.387531	2.09993	0.00120482	0.011147	0.00739296	3720	tags=52%, list=30%, signal=37%	722/715/2023/5621/716/966/7850/3426/330/710/4241/114769/302/5270/2734/3553/2619/718/717/9532/1379/1378/329/1604/199713/1380/2/8530/725/1522/11326/79094/732/5627/5992/930/4323/728/3078/101/4627/3075/712/719/714/713/831
BP	GO:0002761	regulation of myeloid leukocyte differentiation	93	0.371001	2.0221	0.00120627	0.011147	0.00739296	3691	tags=48%, list=30%, signal=34%	1051/4067/6422/84959/1021/146433/3976/5578/677/133522/4057/1230/5457/634/11025/7124/5771/972/5295/9290/10859/11006/3635/133308/920/149233/3458/4853/2124/8600/9770/4286/1435/3059/6348/9935/3593/7071/55294/10221/7098/7099/714/841/7305
BP	GO:0006766	vitamin metabolic process	93	0.393917	2.147	0.00120627	0.011147	0.00739296	3204	tags=48%, list=26%, signal=36%	157506/8942/29968/55350/8564/25902/2348/8875/8876/1381/6615/3553/5641/160428/7124/5646/5360/8884/56922/6017/874/7274/4363/6948/8566/56603/6515/2672/8029/3458/23498/5467/80704/81034/873/6591/53630/6472/9227/9104/316/1727/1583/8277/171425
BP	GO:0042089	cytokine biosynthetic process	93	0.460805	2.51157	0.00120627	0.011147	0.00739296	2147	tags=46%, list=17%, signal=39%	1051/3929/10644/64581/10333/3556/9111/7096/941/3553/10643/2069/351/7124/5588/972/3659/64170/3606/7474/942/5724/3662/3569/1536/5788/943/10859/5606/10392/6774/51311/51465/3552/3635/920/6693/28951/3902/916/940/3458/50943
BP	GO:0051282	regulation of sequestering of calcium ion	89	0.365063	1.97783	0.00120627	0.011147	0.00739296	3948	tags=57%, list=32%, signal=39%	4067/6376/84959/1756/23007/5336/57158/30001/5031/79041/3627/2247/817/5144/255231/6263/1234/3932/6373/5788/6261/1729/3356/4923/356/22821/9474/6375/9472/308/51196/55636/4283/11151/930/6622/1236/6348/6546/1193/55151/23236/5027/5330/56704/3596/6262/1535/6363/2185/2280
BP	GO:0055076	transition metal ion homeostasis	93	0.380186	2.07216	0.00120627	0.011147	0.00739296	2180	tags=34%, list=18%, signal=29%	1356/6280/3934/51312/55240/6279/57217/5621/7037/221074/7018/3091/4057/4241/341208/351/4501/1318/2034/567/6556/3932/2495/1317/7781/8301/23516/94033/9843/147138/4496/26872
BP	GO:0072676	lymphocyte migration	93	0.478754	2.6094	0.00120627	0.011147	0.00739296	3904	tags=65%, list=31%, signal=45%	3383/4478/11240/6364/6376/58191/8740/84830/6278/6288/6347/9420/5293/124976/6355/3627/351/6354/9466/6352/3695/81704/6362/6351/7474/1880/6357/6373/6868/10563/6367/6369/6693/30009/6375/5294/6846/729230/9750/131450/1236/6348/2833/2838/22914/101/199/7499/6361/9023/7535/6793/64005/347/4345/6368/387695/3676/6363/2185
BP	GO:1903038	negative regulation of leukocyte cell-cell adhesion	89	0.563262	3.05163	0.00120627	0.011147	0.00739296	2905	tags=63%, list=23%, signal=49%	1051/27242/445/79679/301/5621/864/57162/5465/3620/3958/26191/80380/84830/2267/3718/8651/3965/53833/3559/941/634/10457/5771/11314/972/3659/201633/10288/56940/64115/29126/942/3566/604/1493/10859/54900/2213/84868/6693/3902/30009/865/6375/50943/11326/10385/9750/26279/55824/79626/23240/3077/10875/3586
BP	GO:0048659	smooth muscle cell proliferation	92	0.44049	2.39541	0.00120919	0.011147	0.00739296	4071	tags=62%, list=33%, signal=42%	6648/1956/7052/1906/10135/3570/6376/3600/5743/3592/2950/7128/10257/6934/5031/4217/6502/2069/2247/7124/6352/3486/4883/3606/5724/3654/3569/4856/10891/9510/57447/183/3458/6772/5467/8013/1839/2254/3586/199/3593/4318/10221/3596/231/3162/5739/347/4208/1535/9759/5591/7048/1499/3248/7168/2547
BP	GO:0051208	sequestering of calcium ion	92	0.364989	1.98484	0.00120919	0.011147	0.00739296	3948	tags=58%, list=32%, signal=40%	4067/6376/84959/1756/23007/5336/57158/30001/5031/79041/3627/2247/817/5144/255231/6263/1234/3932/6373/5788/6261/1729/3356/4923/356/22821/9474/6375/9472/308/811/51196/55636/4283/11151/930/6622/1236/7184/6348/6546/1193/55151/23236/5027/5330/56704/3596/6262/1535/6363/2185/2280
BP	GO:1990266	neutrophil migration	92	0.560171	3.04625	0.00120919	0.011147	0.00739296	2858	tags=64%, list=23%, signal=50%	6280/6374/5142/3929/2919/6279/6364/1525/3576/1906/6376/2921/3958/6288/6347/5293/6372/2920/6355/26525/1907/3627/56833/3553/5197/5144/6354/255231/972/6352/3689/6362/6351/7042/6357/3554/6373/10563/3071/6367/6283/2207/6369/683/8291/6375/5294/5880/6846/120425/7409/4283/9750/57118/1236/3680/4354/728/6348
BP	GO:0001909	leukocyte mediated cytotoxicity	91	0.506405	2.74281	0.00121359	0.011147	0.00739296	2563	tags=56%, list=21%, signal=45%	3383/154064/79465/1075/3592/80328/80329/6372/201294/353091/5873/5817/3965/3134/6318/634/3002/5272/3133/5551/3575/3106/135250/567/3606/8807/10666/5788/10859/3805/3105/3594/2150/114836/2213/84868/57823/3684/9437/149233/3902/6375/4068/51571/23705/7409/909/100431172/11151/3107/56253
BP	GO:0002456	T cell mediated immunity	91	0.500065	2.70847	0.00121359	0.011147	0.00739296	2599	tags=55%, list=21%, signal=44%	3383/154064/79465/1075/3592/80328/80329/353091/5873/5817/53833/3134/8809/3553/634/3133/5551/10384/3575/3106/135250/567/56940/3606/8807/10892/91543/3569/6556/3554/5788/7133/1604/10859/3105/3594/2213/54440/149233/11118/970/30009/6375/50943/51571/909/729230/7454/3107/114548
BP	GO:0042476	odontogenesis	91	0.453942	2.45866	0.00121359	0.011147	0.00739296	2984	tags=51%, list=24%, signal=39%	133/1906/2296/5465/54757/56975/401138/3371/64065/5251/9313/650/7475/362/6608/64919/80326/6382/6331/5156/5066/25818/10913/80320/25928/7042/5818/4982/123041/11096/7570/249/152816/159296/4040/8600/655/340419/1435/130497/3691/5308/860/4771/2308/3066
BP	GO:0043280	positive regulation of cysteine-type endopeptidase activity involved in apoptotic process	91	0.361303	1.9569	0.00121359	0.011147	0.00739296	2927	tags=42%, list=24%, signal=32%	6280/6279/64581/834/355/837/9966/1612/3965/112399/5371/4217/7124/637/8797/64170/10892/3932/8795/1285/10392/1611/9705/7498/58484/356/8743/843/838/1509/6091/9647/10017/114548/6622/1490/3491/55081
BP	GO:0048660	regulation of smooth muscle cell proliferation	91	0.437272	2.36837	0.00121359	0.011147	0.00739296	4071	tags=62%, list=33%, signal=42%	6648/1956/7052/1906/10135/3570/6376/3600/5743/3592/2950/7128/10257/6934/5031/4217/6502/2069/2247/7124/6352/3486/4883/3606/5724/3654/3569/10891/9510/57447/183/3458/6772/5467/8013/1839/2254/3586/199/3593/4318/10221/3596/231/3162/5739/347/4208/1535/9759/5591/7048/1499/3248/7168/2547
BP	GO:0002792	negative regulation of peptide secretion	101	0.39767	2.18348	0.00121507	0.011147	0.00739296	2628	tags=43%, list=21%, signal=34%	27242/2633/10333/6422/301/6376/7850/26191/84830/7128/284/26525/114769/5371/353514/5552/3553/7447/7124/9466/972/440068/131177/5734/91543/4856/199713/10859/9448/79651/2150/51311/2213/3418/7114/50943/308/10385/28984/131450/307/114548/55024
MF	GO:0005201	extracellular matrix structural constituent	102	0.342225	1.88026	0.00121507	0.011147	0.00739296	2447	tags=33%, list=20%, signal=27%	1116/2244/3914/2266/4240/3371/84034/3918/4052/1286/64129/157869/84467/1299/10516/7045/2243/4584/284217/4585/1285/4147/2199/4256/1310/5549/920/2202/1302/85301/256076/90187/8406/91522
BP	GO:0010634	positive regulation of epithelial cell migration	104	0.355942	1.95959	0.00121507	0.011147	0.00739296	3541	tags=49%, list=28%, signal=35%	4233/1906/9982/301/152007/3091/5578/5743/6662/306/5629/284/3640/5641/2247/80005/2113/116150/10000/8828/7474/958/7042/6868/9475/2303/5606/9448/3037/183/2252/7114/3458/154810/811/6997/9647/8829/10982/1839/949/5587/8613/4318/3690/4780/7476/5168/9734/3162/23328
BP	GO:0046330	positive regulation of JNK cascade	104	0.398828	2.19569	0.00121507	0.011147	0.00739296	4173	tags=59%, list=34%, signal=39%	10333/1906/84451/59341/22943/8767/197259/6386/9258/26525/4217/8792/64127/7164/3553/351/7124/56940/64170/7474/10913/4317/8324/29969/653361/10392/6504/2150/2213/221472/389432/153090/8600/9770/22881/153769/11184/1236/959/1647/1490/2043/344558/939/57216/23236/23043/7098/7476/7099/9839/54106/23328/6788/6850/6363/2185/10371/51776/3557/9175
BP	GO:0050715	positive regulation of cytokine secretion	104	0.481803	2.6525	0.00121507	0.011147	0.00739296	2599	tags=51%, list=21%, signal=41%	7097/5005/3459/5004/834/3556/79679/7096/59341/965/8767/26191/6288/55612/4321/3965/9447/353514/64127/3553/7124/26253/64135/29126/2268/7474/23601/4317/3566/93978/5008/5734/929/24145/199713/51744/2150/51311/2597/3552/914/84868/3735/5047/23765/3458/2219/23705/1436/55801/28984/56253/114548
BP	GO:0061041	regulation of wound healing	104	0.373201	2.05461	0.00121507	0.011147	0.00739296	2386	tags=38%, list=19%, signal=31%	4067/64581/2244/1906/301/2266/84959/5329/5578/84830/710/7128/135228/10855/302/3640/5270/634/2247/5588/7852/2243/158376/5156/5055/5341/50506/4638/23189/2303/2150/2207/10630/114897/51330/5328/308/5467/5627
BP	GO:0062013	positive regulation of small molecule metabolic process	104	0.362394	1.99511	0.00121507	0.011147	0.00739296	2106	tags=35%, list=17%, signal=29%	157506/133/136/301/2023/5465/3091/5743/5031/85414/3553/5208/5209/351/7124/5771/134429/5562/972/3269/648791/5724/2978/51744/10891/55022/6774/195827/3037/3356/5230/4923/225/84649/7114/3458
BP	GO:0002698	negative regulation of immune effector process	97	0.458395	2.49457	0.00121655	0.011147	0.00739296	2512	tags=48%, list=20%, signal=39%	722/57115/301/966/3958/710/3718/284/3965/53833/3134/3559/56833/6318/634/5272/3133/7124/3575/11314/11213/56940/114771/3566/7042/1378/961/604/10225/5788/1604/10859/3805/2213/84868/2/7105/725/30009/6375/8832/50943/11326/10475/729230/115352/6397
BP	GO:0035150	regulation of tube size	97	0.380343	2.06982	0.00121655	0.011147	0.00739296	2314	tags=35%, list=19%, signal=29%	6648/59342/3383/59272/133/136/1956/2244/1906/2266/2296/5997/5743/1907/2982/952/2243/80005/3269/5724/9475/2303/3779/2150/3356/80852/219537/183/9474/2643/9732/1131/553/5467
BP	GO:0050728	negative regulation of inflammatory response	97	0.390652	2.12592	0.00121655	0.011147	0.00739296	2614	tags=41%, list=21%, signal=33%	116379/140885/6376/5465/7850/6288/2950/7128/9258/53833/113/3559/4907/56833/7132/100/284340/5771/90268/2113/2358/5734/64838/9021/4856/5788/7133/199713/730249/2213/89790/8530/225/50943/5467/4210/284467/131450/114548/5740
MF	GO:0019955	cytokine binding	103	0.493128	2.70592	0.00121803	0.011147	0.00739296	3999	tags=67%, list=32%, signal=46%	116379/9180/3459/2633/3570/3595/7850/3592/4052/135228/1230/26525/10068/53833/8200/8809/8792/3559/3815/7132/7852/9466/972/3561/8828/10663/114990/25928/1234/7046/3554/7133/199713/1438/3594/10630/3587/2/920/149233/3560/1238/51554/2829/1436/1233/729230/8829/3688/26585/1236/1237/10803/2833/133396/10626/3593/3690/375387/90/7049/58985/3597/9034/9244/3685/3676/7048/64388
BP	GO:0035821	modification of morphology or physiology of other organism	103	0.360543	1.97839	0.00121803	0.011147	0.00739296	2425	tags=36%, list=20%, signal=29%	6280/6590/64581/57115/5806/3853/4057/6372/6355/302/5272/5551/6352/858/114771/6351/6357/4069/3839/6283/2150/2597/8542/10578/84659/402569/920/9367/3482/30835/3458/3840/51193/1436/219972/117159/3346
BP	GO:0050921	positive regulation of chemotaxis	103	0.423144	2.3219	0.00121803	0.011147	0.00739296	3549	tags=54%, list=29%, signal=39%	4233/3929/3576/1906/3570/59341/8740/3592/6278/1230/23075/1907/3965/3627/5641/2247/284340/7941/7852/6354/972/6352/6351/7474/2358/3569/6868/10563/3071/2150/8291/3735/6375/7114/5880/6846/811/1233/729230/56670/9750/1435/9647/57118/8829/1236/728/6348/199/5587/63940/5919/3603/196527/719/79647
BP	GO:0072525	pyridine-containing compound biosynthetic process	103	0.353884	1.94185	0.00121803	0.011147	0.00739296	2670	tags=39%, list=21%, signal=31%	8942/29968/5214/8564/10135/2023/5465/3620/54541/3091/5743/5236/11182/53632/5208/5209/351/4837/5562/3939/3101/57103/283209/169355/10891/8566/6774/195827/2597/3356/5230/3418/3458/23498/80201/2646/9688/5315/5740/7167
BP	GO:0002224	toll-like receptor signaling pathway	107	0.500061	2.7557	0.00121951	0.011147	0.00739296	2257	tags=48%, list=18%, signal=39%	6280/7097/3929/4067/6279/2244/10333/2266/7096/57162/118788/79931/8767/26191/330/338382/1520/7128/4057/9258/3656/10010/6197/5641/11314/2243/3659/7321/3689/11213/23643/9641/3662/3654/91543/929/329/1514/2150/6271/51311/730249/2672/7100/84868/3684/1508/695/23118/4615/153090
BP	GO:0002688	regulation of leukocyte chemotaxis	94	0.468996	2.54662	0.00121951	0.011147	0.00739296	3120	tags=56%, list=25%, signal=43%	11240/3929/4067/3576/1906/3570/59341/8740/3592/6278/6347/1230/23075/1907/3965/3627/56833/5641/284340/7941/6354/972/6352/6351/7474/2358/3569/6868/4856/10563/3071/2150/683/8291/3735/2841/6375/5880/6846/811/729230/9750/1435/57118/26585/1236/4354/26228/728/6348/22914/199/63940
BP	GO:0002708	positive regulation of lymphocyte mediated immunity	87	0.489616	2.62814	0.00121951	0.011147	0.00739296	2599	tags=55%, list=21%, signal=44%	154064/7037/79465/3592/80328/80329/353091/5817/3134/8809/3553/3133/7124/3106/718/135250/567/3606/8807/10892/958/10666/91543/3569/3554/5788/3805/4049/3105/3594/2207/114836/54440/149233/3902/30009/6375/4068/940/50943/695/51571/23705/7409/909/3107/56253/114548
BP	GO:0008037	cell recognition	107	0.347303	1.91389	0.00121951	0.011147	0.00739296	3398	tags=44%, list=27%, signal=32%	27242/2525/4478/64581/8440/4240/79937/3958/26998/2047/351/7852/5551/55790/81704/128434/1794/10666/79820/2048/84665/923/91624/84868/2049/30835/5047/2219/6091/23705/2352/64221/2683/921/100423062/56253/8829/1236/84329/949/2043/22948/49/390243/55079/117144/57829
BP	GO:0010594	regulation of endothelial cell migration	107	0.336777	1.85589	0.00121951	0.011147	0.00739296	3739	tags=49%, list=30%, signal=34%	4233/1906/9982/301/1969/7101/3091/5578/5743/306/5629/284/4851/634/5641/2247/2113/116150/10000/8828/7474/958/6868/9475/10563/2303/5606/183/7114/154810/23616/811/153090/6997/56999/28984/1942/8829/949/161742/5587/8613/3690/4780/55294/7476/9734/3162/23328/11235/6672/4208
BP	GO:0022612	gland morphogenesis	88	0.39548	2.12941	0.00121951	0.011147	0.00739296	2692	tags=45%, list=22%, signal=36%	1051/4478/8837/1956/7052/6422/1969/3371/6662/7128/9420/2267/5629/5268/4781/3400/2119/5371/4851/5727/634/7124/5080/7474/5361/10913/25928/7042/284217/5324/2252/159296/4040/10481/1436/655/1435/6591/8829/9423
BP	GO:0042035	regulation of cytokine biosynthetic process	88	0.450089	2.42345	0.00121951	0.011147	0.00739296	3786	tags=61%, list=30%, signal=43%	1051/3929/10644/64581/10333/9111/7096/941/3553/10643/2069/351/7124/5588/972/3659/64170/7474/942/5724/3662/3569/1536/5788/943/10859/5606/6774/51311/51465/3552/3635/920/6693/28951/3902/916/940/3458/50943/729230/84433/4050/3586/10642/3593/7098/7099/59067/3162/54106/7305/54206/6850
BP	GO:0042107	cytokine metabolic process	94	0.467495	2.53847	0.00121951	0.011147	0.00739296	2147	tags=47%, list=17%, signal=39%	1051/3929/10644/64581/10333/3556/9111/7096/9966/941/3553/10643/2069/351/7124/5588/972/3659/64170/3606/7474/942/5724/3662/3569/1536/5788/943/10859/5606/10392/6774/51311/51465/3552/3635/920/6693/28951/3902/916/940/3458/50943
BP	GO:0050864	regulation of B cell activation	87	0.485194	2.60441	0.00121951	0.011147	0.00739296	3003	tags=59%, list=24%, signal=45%	27242/4067/6422/7037/57162/3574/677/7128/286410/200558/10673/678/64127/56833/150372/100/952/11314/9466/972/1880/958/196/3569/604/84174/1540/5788/3071/1493/3149/2213/3635/683/54440/30009/4332/940/50943/695/64092/115352/22806/100423062/930/55024/4323/472/84433/3586/939
BP	GO:0051283	negative regulation of sequestering of calcium ion	87	0.373502	2.00487	0.00121951	0.011147	0.00739296	3948	tags=59%, list=32%, signal=40%	4067/6376/84959/1756/23007/5336/57158/30001/5031/79041/3627/2247/817/5144/255231/6263/1234/3932/6373/5788/6261/1729/3356/4923/356/22821/9474/6375/9472/308/51196/55636/4283/11151/930/6622/1236/6348/6546/1193/55151/23236/5027/5330/56704/3596/6262/1535/6363/2185/2280
BP	GO:0070613	regulation of protein processing	88	0.39633	2.13399	0.00121951	0.011147	0.00739296	3720	tags=53%, list=30%, signal=38%	722/715/2023/5621/716/966/7850/3426/330/710/4241/114769/302/5270/2734/3553/2619/718/717/9532/1379/1378/329/1604/199713/1380/2/8530/725/1522/11326/79094/732/5627/5992/930/4323/728/3078/101/4627/3075/712/719/714/713/831
BP	GO:0032609	interferon-gamma production	96	0.545591	2.96627	0.001221	0.011147	0.00739296	2293	tags=57%, list=18%, signal=47%	5142/64581/140885/57115/79679/3570/5621/8767/3595/26191/80380/3592/26525/3965/53833/8809/3553/7124/5144/9466/64115/114771/3606/29126/7474/8807/10666/929/6556/3554/961/10225/11119/10859/51744/4049/3594/2150/3394/51311/3702/114836/914/84868/54440/149233/11118/6693/916/6375/50943/3113/51571/7294/8320
BP	GO:0035296	regulation of tube diameter	96	0.38233	2.07865	0.001221	0.011147	0.00739296	2314	tags=35%, list=19%, signal=29%	6648/59342/3383/59272/133/136/1956/2244/1906/2266/2296/5997/5743/1907/2982/952/2243/80005/3269/5724/9475/2303/3779/2150/3356/80852/219537/183/9474/2643/9732/1131/553/5467
BP	GO:0042552	myelination	96	0.364157	1.97985	0.001221	0.011147	0.00739296	2268	tags=35%, list=18%, signal=29%	27242/7097/57211/7851/7368/1075/9444/84668/9334/5653/8898/3400/6285/400746/79628/4664/7852/10397/4118/11202/5915/3084/7133/6663/6326/81846/8530/3687/225/745/5803/9928/10810/8882
CC	GO:0045335	phagocytic vesicle	96	0.396241	2.15428	0.001221	0.011147	0.00739296	4344	tags=64%, list=35%, signal=42%	7097/10333/7096/306/338382/4057/3134/6891/4688/6890/55647/3133/7791/3106/50617/10981/567/7431/8724/6556/653361/1536/3105/83547/10578/3920/752/1755/51762/9367/9474/4689/5880/201475/811/219972/51715/11151/7454/3107/19/4353/84329/339122/101/10228/23380/5906/3135/54106/6892/1535/6850/3685/23208/2889/23682/54734/55529/51284/23545
BP	GO:0046425	regulation of JAK-STAT cascade	96	0.373411	2.03016	0.001221	0.011147	0.00739296	3975	tags=55%, list=32%, signal=38%	116379/4067/3570/1545/3600/3976/3592/3718/8651/4851/3815/3588/7132/7124/5771/11314/6352/3606/958/5008/3569/9021/5788/338376/6774/3587/149233/1437/183/3458/54625/1436/2534/55801/3059/51379/1443/4771/3586/3066/2688/133396/3593/59067/3596/83666/231/9244/3456/54741/2185/3446/1950
BP	GO:0050880	regulation of blood vessel size	96	0.38233	2.07865	0.001221	0.011147	0.00739296	2314	tags=35%, list=19%, signal=29%	6648/59342/3383/59272/133/136/1956/2244/1906/2266/2296/5997/5743/1907/2982/952/2243/80005/3269/5724/9475/2303/3779/2150/3356/80852/219537/183/9474/2643/9732/1131/553/5467
BP	GO:0097746	regulation of blood vessel diameter	96	0.38233	2.07865	0.001221	0.011147	0.00739296	2314	tags=35%, list=19%, signal=29%	6648/59342/3383/59272/133/136/1956/2244/1906/2266/2296/5997/5743/1907/2982/952/2243/80005/3269/5724/9475/2303/3779/2150/3356/80852/219537/183/9474/2643/9732/1131/553/5467
BP	GO:0031214	biomineral tissue development	105	0.370787	2.03635	0.00122249	0.011147	0.00739296	3739	tags=50%, list=30%, signal=35%	1051/5465/54757/2824/56975/8326/401138/3091/5743/6662/5251/9313/4057/650/1230/7475/4851/302/5552/10457/56172/6696/4015/2268/144347/4921/5818/9475/4256/249/152816/655/3346/340419/133060/130497/26585/654/6348/3491/433/2308/6546/7071/55151/197/5027/90/196527/4322/4146/4208
BP	GO:0050671	positive regulation of lymphocyte proliferation	105	0.536697	2.94752	0.00122249	0.011147	0.00739296	3998	tags=74%, list=32%, signal=51%	8440/79679/301/3570/7037/4690/57162/8767/3600/80380/3574/3592/3718/3965/10673/3559/941/3553/3133/100/5588/952/7412/972/6352/10288/3606/29126/4860/942/1880/958/3109/3569/604/5788/3071/1604/3594/8744/923/683/84868/54440/920/149233/30835/970/100133941/916/6375/940/50943/3113/729230/115352/11151/11148/959/126259/84433/199/3593/3115/57829/7099/59067/3596/7535/54106/4352/4208/6850/6363/7048/1947/912/16…
MF	GO:0005178	integrin binding	95	0.448615	2.43284	0.00122399	0.011147	0.00739296	4524	tags=66%, list=36%, signal=42%	3383/4067/1956/1525/6376/4240/7087/3696/5578/25975/9294/3553/87/8838/2247/10516/10457/6696/5771/7045/7412/3694/3689/3695/10666/6868/4856/3084/1285/10518/11096/5803/83706/60437/811/120425/3691/3688/4323/8482/1490/3936/3491/7077/88/4627/3690/5034/7402/2335/8751/6850/2208/3685/3384/3678/7094/5764/7103/84978/102/2246/8754
BP	GO:0032946	positive regulation of mononuclear cell proliferation	106	0.538015	2.95781	0.00122549	0.011147	0.00739296	3998	tags=75%, list=32%, signal=51%	8440/79679/301/3570/7037/4690/57162/8767/3600/80380/3574/3592/3718/3965/10673/3559/941/3553/3133/100/5588/952/7412/972/6352/10288/3606/29126/4860/942/1880/958/3109/3569/604/5788/3071/1604/3594/8744/923/683/84868/54440/920/149233/30835/970/100133941/916/6375/940/50943/3113/729230/115352/1435/11151/11148/959/126259/84433/199/3593/3115/57829/7099/59067/3596/7535/54106/4352/4208/6850/6363/7048/1947/9…
BP	GO:2001056	positive regulation of cysteine-type endopeptidase activity	106	0.387185	2.1286	0.00122549	0.011147	0.00739296	2927	tags=44%, list=24%, signal=34%	6280/6279/64581/834/355/3428/8767/837/9966/64065/1612/3965/112399/5371/4217/9447/5641/7124/637/8797/64170/10892/2904/3932/444/8795/1285/10392/1611/9705/7498/58484/356/8743/843/838/1509/6091/2534/4210/9647/10017/114548/6622/1490/3491/55081
BP	GO:0002687	positive regulation of leukocyte migration	99	0.48508	2.64476	0.00122699	0.011147	0.00739296	3549	tags=61%, list=29%, signal=44%	3383/3929/6364/3576/1906/3570/59341/3958/8740/3592/6278/1230/23075/6355/1907/3965/3627/351/5641/7124/284340/7941/6354/972/6352/81704/6351/7474/5724/2358/3569/3554/6868/10563/3071/2150/6369/8291/3735/6693/6375/5880/6846/811/729230/9750/1435/57118/1236/4323/728/6348/101/199/63940/7499/5919/196527/719/79647
BP	GO:0007272	ensheathment of neurons	98	0.35958	1.95638	0.00122699	0.011147	0.00739296	2314	tags=36%, list=19%, signal=29%	27242/7097/57211/7851/7368/1075/9444/84668/9334/5653/8898/3400/6285/400746/79628/4664/7852/10397/4118/11202/5915/3084/7133/6663/6326/81846/8530/3687/225/745/5803/9928/10810/8882/5467
BP	GO:0008366	axon ensheathment	98	0.35958	1.95638	0.00122699	0.011147	0.00739296	2314	tags=36%, list=19%, signal=29%	27242/7097/57211/7851/7368/1075/9444/84668/9334/5653/8898/3400/6285/400746/79628/4664/7852/10397/4118/11202/5915/3084/7133/6663/6326/81846/8530/3687/225/745/5803/9928/10810/8882/5467
BP	GO:0019359	nicotinamide nucleotide biosynthetic process	100	0.340421	1.85961	0.00122699	0.011147	0.00739296	2670	tags=38%, list=21%, signal=30%	8942/5214/8564/10135/2023/5465/3620/54541/3091/5743/5236/11182/53632/5208/5209/351/4837/5562/3939/3101/57103/283209/169355/10891/6774/195827/2597/3356/5230/3418/3458/23498/80201/2646/9688/5315/5740/7167
BP	GO:0019363	pyridine nucleotide biosynthetic process	100	0.340421	1.85961	0.00122699	0.011147	0.00739296	2670	tags=38%, list=21%, signal=30%	8942/5214/8564/10135/2023/5465/3620/54541/3091/5743/5236/11182/53632/5208/5209/351/4837/5562/3939/3101/57103/283209/169355/10891/6774/195827/2597/3356/5230/3418/3458/23498/80201/2646/9688/5315/5740/7167
BP	GO:0030183	B cell differentiation	98	0.443051	2.41052	0.00122699	0.011147	0.00739296	3927	tags=63%, list=32%, signal=44%	6422/8326/3574/677/5336/222487/286410/3718/678/56833/3815/150372/100/5452/5771/7412/112616/5295/1880/10892/604/6868/1540/5788/3071/1380/338376/3149/2213/3635/974/23228/159296/4853/695/139818/115352/22806/3688/930/57379/4323/959/5896/472/84433/3586/931/939/1316/973/64421/9734/54106/9759/6850/5591/3456/3676/2185/3446/100141515
BP	GO:0035051	cardiocyte differentiation	98	0.352901	1.92004	0.00122699	0.011147	0.00739296	2684	tags=39%, list=22%, signal=31%	1956/1525/1906/2348/5465/22943/5997/55553/5629/650/4851/302/2627/7412/144165/5156/7490/115701/8324/7042/5915/4604/3084/4606/91807/183/9474/8470/9472/811/8320/655/1482/11149/3688/6722/5308/26585
BP	GO:0046718	viral entry into host cell	99	0.460041	2.50824	0.00122699	0.011147	0.00739296	3230	tags=53%, list=26%, signal=39%	3383/9076/59272/1956/1525/7037/5806/1969/5817/3965/7113/941/4340/7852/972/3694/858/3695/50848/1803/942/23601/6317/1234/1378/10107/8724/5818/1604/1380/3839/6504/3356/85363/920/1508/30835/4360/51193/2219/10475/10410/11060/3688/286827/81607/949/2838/4864/6737/6404/3690
BP	GO:0050709	negative regulation of protein secretion	98	0.401963	2.18698	0.00122699	0.011147	0.00739296	2628	tags=43%, list=21%, signal=34%	27242/2633/10333/6422/301/6376/7850/26191/84830/7128/284/26525/114769/5371/353514/5552/3553/7447/7124/9466/440068/131177/5734/91543/4856/199713/10859/9448/79651/2150/51311/2213/3418/7114/50943/308/10385/28984/131450/307/114548/55024
BP	GO:0061351	neural precursor cell proliferation	100	0.356907	1.94967	0.00122699	0.011147	0.00739296	4439	tags=57%, list=36%, signal=37%	4067/6376/8326/2173/7101/3091/5629/3400/6496/9289/4851/2047/6608/5080/27185/7474/11023/63950/2316/6663/9355/64211/6259/1522/5803/9928/79801/8323/80709/728/4771/8624/2308/547/5048/10642/9181/1638/8650/5455/7476/9839/85440/388610/7472/84858/1499/1950/2889/259266/120892/23440/9833/5764/89780/7005/57650
BP	GO:0071621	granulocyte chemotaxis	98	0.577695	3.14308	0.00122699	0.011147	0.00739296	2858	tags=66%, list=23%, signal=51%	6280/6374/5142/3929/2919/6279/6364/1525/3576/1906/301/6376/59341/30817/2921/3958/6278/6288/6347/5293/6372/2920/6355/26525/1907/3627/3553/284340/5197/5144/6354/972/6352/3689/6362/3269/6351/7042/6357/6373/10563/3071/6367/6283/2207/6369/683/8291/3735/23765/6375/5294/5880/6846/120425/7409/4283/9750/1435/57118/1236/3680/4354/728/6348
BP	GO:0097553	calcium ion transmembrane import into cytosol	98	0.373506	2.03215	0.00122699	0.011147	0.00739296	3948	tags=57%, list=32%, signal=39%	4067/55503/6376/5621/84959/1756/23007/5336/57158/30001/5031/79041/3627/2247/817/5144/255231/6263/2904/1234/3932/6373/5788/6261/1729/3356/4923/356/22821/9474/6375/9472/51196/55636/4283/2534/11151/930/6622/1236/6348/6546/1193/2903/55151/23236/5027/5330/56704/3596/493/6262/1535/6363/2185/2280
BP	GO:1904892	regulation of STAT cascade	100	0.362747	1.98158	0.00122699	0.011147	0.00739296	3975	tags=54%, list=32%, signal=37%	116379/4067/3570/1545/3600/3976/3592/3718/8651/4851/3815/3588/7132/7124/5771/3575/11314/6352/3606/958/5008/3569/9021/5788/338376/6774/3587/149233/1437/183/3458/54625/1436/2534/55801/3059/51379/1443/4771/3586/3066/2688/133396/3593/59067/3596/83666/231/9244/3456/54741/2185/3446/1950
BP	GO:0032612	interleukin-1 production	85	0.529303	2.81623	0.0012285	0.011147	0.00739296	3835	tags=67%, list=31%, signal=47%	55765/5005/5004/64581/140885/10333/834/301/6376/3428/8767/7850/6288/2950/7128/115362/114769/3965/5371/9447/353514/64127/3553/634/351/440068/8877/7474/10892/24145/199713/10392/149628/2150/51311/84868/58484/4332/3458/56670/4210/19/114548/945/1236/6348/3586/3066/10626/384/5027/7099/338322/841/7305/54206/6363
BP	GO:0070268	cornification	85	0.480666	2.55745	0.0012285	0.011147	0.00739296	1957	tags=45%, list=16%, signal=38%	25984/3868/5266/3855/23581/3854/3887/3853/1824/9333/64065/1825/6768/643414/1830/3872/286887/3866/125115/3852/3857/9119/5493/5317/3851/25818/1475/5318/3889/7051/56603/1828/3861/390792/3713/196374/1823/3849
BP	GO:0002377	immunoglobulin production	80	0.391586	2.05447	0.00123001	0.011147	0.00739296	2905	tags=48%, list=23%, signal=37%	7037/115004/23075/200558/10673/3133/7124/5452/2590/3575/9466/25939/3566/958/3569/604/5788/54900/2213/54440/9245/10758/30009/6375/940/50943/695/29802/115352/57379/9156/959/126259/472/165918/84433/10875/3586
MF	GO:0004896	cytokine receptor activity	80	0.50803	2.6654	0.00123001	0.011147	0.00739296	3623	tags=65%, list=29%, signal=46%	116379/9180/3459/3455/3556/3570/3601/3595/7850/8808/1230/53833/8809/3559/3588/7852/3460/3575/1439/9466/972/3561/10663/8807/3566/1234/3554/1438/3594/3587/50615/920/149233/23765/3560/1238/51554/2829/1233/729230/1236/1237/10803/2833/10936/133396/3593/54756/58985/3597/4352/9034
BP	GO:0042102	positive regulation of T cell proliferation	80	0.574561	3.01445	0.00123001	0.011147	0.00739296	3998	tags=79%, list=32%, signal=54%	8440/79679/301/3570/7037/4690/8767/3600/80380/3592/3718/3965/10673/3559/941/3553/3133/5588/7412/6352/10288/3606/29126/4860/942/3109/3569/5788/3071/1604/3594/8744/923/84868/54440/920/149233/30835/970/100133941/916/6375/940/50943/3113/729230/11151/11148/959/126259/84433/199/3593/3115/57829/59067/7535/6850/6363/7048/1947/912/160365
BP	GO:0042116	macrophage activation	79	0.486022	2.548	0.00123001	0.011147	0.00739296	3786	tags=63%, list=30%, signal=44%	7097/3929/3459/10333/10135/6376/7096/1075/9258/1907/351/671/7124/972/3689/8877/7474/4317/3566/2358/3569/6556/5788/51311/2213/8291/84868/8530/3684/3735/1437/3458/11326/56670/284467/6622/472/26228/728/6348/3586/199/133396/712/7098/7099/3596/7305/4345/6850
BP	GO:0045621	positive regulation of lymphocyte differentiation	79	0.484134	2.5381	0.00123001	0.011147	0.00739296	3458	tags=63%, list=28%, signal=46%	301/864/8767/8876/3600/3574/3592/8808/286410/8651/3965/3559/941/9308/100/9760/3575/972/10288/64115/3606/4860/942/3566/10892/604/1540/5788/3071/11006/3594/8744/3635/54440/149233/865/3458/50943/695/10385/114548/4323/5896/101/939/9840/3593/9655/3135/7535
BP	GO:0050868	negative regulation of T cell activation	80	0.578682	3.03608	0.00123001	0.011147	0.00739296	2905	tags=66%, list=23%, signal=51%	1051/27242/79679/301/5621/864/57162/3620/3958/26191/80380/2267/3718/8651/3965/53833/3559/941/634/10457/5771/11314/972/3659/201633/10288/56940/64115/29126/942/3566/604/1493/10859/54900/2213/84868/6693/3902/30009/865/6375/50943/11326/10385/9750/26279/55824/79626/23240/3077/10875/3586
BP	GO:0071887	leukocyte apoptotic process	79	0.465492	2.44037	0.00123001	0.011147	0.00739296	3003	tags=52%, list=24%, signal=40%	27242/4067/301/3620/3958/3091/5293/3718/3965/3559/64127/100/5588/3575/972/6352/81704/29126/7474/1234/3569/604/6868/10859/1514/2207/5133/917/356/10758/695/8013/3059/1942/10461/1236/5896/1029/3586/101/939
BP	GO:1903409	reactive oxygen species biosynthetic process	79	0.417897	2.19085	0.00123001	0.011147	0.00739296	3782	tags=57%, list=30%, signal=40%	3383/445/55765/8837/64581/140885/10333/1906/1545/5806/5743/5873/3553/8838/7124/3689/90527/50506/4317/961/1536/9475/6774/55532/225/183/2643/3458/2534/5740/6622/4353/405753/9104/3586/22914/199/384/7099/4129/493/53905/1535/9759/215
BP	GO:1990868	response to chemokine	80	0.532628	2.79445	0.00123001	0.011147	0.00739296	2972	tags=59%, list=24%, signal=45%	11240/6374/2919/6364/3576/1906/6376/2296/2921/3091/6347/6372/1230/2920/6355/3627/5197/7852/6354/6352/4015/81704/6362/10663/6351/6357/1234/6373/10563/6367/6369/6375/6846/6091/1238/51554/2829/4283/1233/729230/9750/1236/1237/10803/6348/2833/10936
BP	GO:1990869	cellular response to chemokine	80	0.532628	2.79445	0.00123001	0.011147	0.00739296	2972	tags=59%, list=24%, signal=45%	11240/6374/2919/6364/3576/1906/6376/2296/2921/3091/6347/6372/1230/2920/6355/3627/5197/7852/6354/6352/4015/81704/6362/10663/6351/6357/1234/6373/10563/6367/6369/6375/6846/6091/1238/51554/2829/4283/1233/729230/9750/1236/1237/10803/6348/2833/10936
BP	GO:0021782	glial cell development	81	0.40636	2.13469	0.00123305	0.011147	0.00739296	1517	tags=32%, list=12%, signal=28%	7097/25825/4067/3459/6279/57211/1956/26227/1021/2950/9334/3400/6608/400746/3553/79628/351/7124/4919/10397/2358/7431/6664/3569/3084/6663
BP	GO:0030316	osteoclast differentiation	81	0.442512	2.3246	0.00123305	0.011147	0.00739296	3420	tags=52%, list=28%, signal=38%	1051/6422/7037/84959/1969/56975/133522/135228/4057/1230/5457/302/8792/79705/11025/7124/5295/1945/126014/1880/9290/10859/11006/2207/3635/133308/149233/3458/4853/8600/1436/9770/4286/1435/6348/9935/5048/3593/7071/55294/7098/7099
BP	GO:0034446	substrate adhesion-dependent cell spreading	81	0.398176	2.0917	0.00123305	0.011147	0.00739296	4098	tags=57%, list=33%, signal=38%	1946/2633/2244/3914/2266/6281/23603/3918/10562/201294/4241/3987/2243/80005/3695/8324/10979/23189/2316/3037/10630/2049/64098/83706/9928/811/10109/11149/1942/8829/57091/10461/3915/4739/23380/3690/5861/7301/2335/3685/3676/29780/2192/84168/4070/59277
BP	GO:0002367	cytokine production involved in immune response	86	0.47736	2.54396	0.00123457	0.011147	0.00739296	3552	tags=64%, list=29%, signal=46%	7097/55765/3592/51704/3718/284/353091/3134/8809/64127/3553/3815/3133/7124/972/11213/567/3606/7474/8807/10892/7042/10666/91543/3569/6556/3554/604/10225/7133/1604/10859/3805/2150/2207/54440/3735/9474/30009/6375/50943/695/729230/8013/114548/9188/8482/3077/3586/3593/7098/7099/3135/3162/1739
BP	GO:0002821	positive regulation of adaptive immune response	86	0.48504	2.58489	0.00123457	0.011147	0.00739296	2599	tags=53%, list=21%, signal=43%	301/3570/7037/8767/3592/5817/10673/3134/8809/941/3553/3133/7124/100/5588/3106/9466/718/567/3606/29126/10892/958/10666/91543/3569/6556/3554/5788/4049/3105/3594/2207/54440/920/149233/30009/6375/940/50943/695/51571/909/729230/3107/114548
BP	GO:0002824	positive regulation of adaptive immune response based on somatic recombination of immune receptors built from immunoglobulin superfamily domains	83	0.49731	2.62502	0.00123457	0.011147	0.00739296	2599	tags=55%, list=21%, signal=44%	301/3570/7037/8767/3592/5817/10673/3134/8809/941/3553/3133/7124/100/5588/3106/9466/718/567/3606/29126/10892/958/10666/91543/3569/6556/3554/5788/4049/3105/3594/2207/54440/920/149233/30009/6375/940/50943/695/51571/909/729230/3107/114548
BP	GO:0016064	immunoglobulin mediated immune response	83	0.4757	2.51095	0.00123457	0.011147	0.00739296	4006	tags=66%, list=32%, signal=45%	722/715/716/7037/3426/710/23075/200558/51279/3133/7124/5452/9466/972/718/717/3566/958/10666/1378/604/5788/1604/1380/4049/2207/51311/2213/3635/725/9245/30009/6375/940/50943/695/732/100423062/930/57379/9156/959/165918/10875/3586/939/3119/712/714/713/2208/100141515/55183/1401/2956
BP	GO:0019724	B cell mediated immunity	86	0.483419	2.57625	0.00123457	0.011147	0.00739296	4006	tags=67%, list=32%, signal=46%	722/715/716/7037/3426/710/23075/200558/51279/3133/7124/5452/9466/972/718/717/3566/958/10666/1378/604/84174/5788/1604/1380/4049/2207/51311/2213/3635/725/9245/970/30009/6375/940/50943/695/732/100423062/930/57379/9156/959/165918/10875/3586/939/3119/712/3135/714/713/2208/100141515/55183/1401/2956
BP	GO:0019730	antimicrobial humoral response	86	0.499642	2.6627	0.00123457	0.011147	0.00739296	1814	tags=44%, list=15%, signal=38%	6280/3934/6590/6374/2919/6279/2244/3576/57115/5266/1672/2921/3853/6278/4057/6372/2920/26525/3627/3133/671/5197/5646/5650/2243/114771/25818/6357/6556/6373/10563/4069/6283/730249/2597/10578/1755/84659
BP	GO:0030593	neutrophil chemotaxis	83	0.588396	3.10581	0.00123457	0.011147	0.00739296	2858	tags=67%, list=23%, signal=52%	6280/6374/5142/3929/2919/6279/6364/1525/3576/1906/6376/2921/3958/6288/6347/5293/6372/2920/6355/26525/1907/3627/3553/5197/5144/6354/972/6352/3689/6362/6351/7042/6357/6373/10563/3071/6367/6283/2207/6369/683/8291/6375/5294/5880/6846/120425/7409/4283/9750/57118/1236/3680/4354/728/6348
BP	GO:0031341	regulation of cell killing	86	0.552388	2.9438	0.00123457	0.011147	0.00739296	3446	tags=71%, list=28%, signal=52%	3383/64581/57115/154064/966/79465/3853/3592/80328/80329/6372/353091/5817/3965/3134/6318/634/5272/3133/5551/3575/3106/135250/567/114771/8807/1379/10666/5788/1604/10859/3805/3105/3594/2150/114836/2597/2213/84868/3684/9437/149233/3902/6375/4068/3458/51571/23705/7409/909/3107/56253/26228/22914/3593/3075/8417/5027/59067/3596/3135
BP	GO:0032649	regulation of interferon-gamma production	86	0.526562	2.80617	0.00123457	0.011147	0.00739296	2249	tags=55%, list=18%, signal=45%	5142/64581/140885/57115/3570/5621/8767/3595/26191/80380/3592/26525/3965/53833/8809/3553/7124/5144/9466/64115/114771/3606/29126/7474/10666/929/6556/3554/961/10225/10859/51744/4049/3594/3394/51311/114836/914/84868/54440/149233/916/6375/50943/3113/51571/7294
BP	GO:0046632	alpha-beta T cell differentiation	83	0.487877	2.57523	0.00123457	0.011147	0.00739296	2657	tags=57%, list=21%, signal=45%	301/864/8767/6932/3718/8651/3965/8809/941/9308/64919/100/3659/3606/4860/942/5971/3662/1880/3566/10892/5734/91543/3569/604/3071/6774/3594/639/3702/114836/54440/149233/2841/6693/30009/159296/865/3458/50943/2529/4063/5075/8320/114548/257101/26279
BP	GO:1901222	regulation of NIK/NF-kappaB signaling	83	0.471169	2.48704	0.00123457	0.011147	0.00739296	3541	tags=55%, list=28%, signal=40%	1116/7097/1956/10333/1906/9966/26191/8740/9516/222487/3965/3987/8809/64127/3553/351/7124/8797/8877/3606/10913/4317/10892/3654/929/4856/1540/8795/329/10392/84868/7105/7114/389432/811/9770/655/114548/939/192669/3593/5610/7098/7099/54106/23328
BP	GO:0002286	T cell activation involved in immune response	77	0.505192	2.63049	0.00124069	0.011147	0.00739296	2293	tags=53%, list=18%, signal=44%	3383/301/8767/3958/3718/5873/3965/8809/941/634/26253/3606/942/5971/3662/1880/3566/338339/10892/5734/3109/3569/6556/604/10859/338376/6774/3594/2150/2207/54518/114836/2213/84868/149233/6693/30009/3458/50943/4063/8320
BP	GO:1902106	negative regulation of leukocyte differentiation	77	0.448371	2.33463	0.00124069	0.011147	0.00739296	3519	tags=57%, list=28%, signal=41%	4067/57115/6422/301/864/84959/1021/4057/3718/8651/634/11025/5771/972/5295/3659/114771/3566/9290/604/1493/10859/11006/3149/28959/2213/3635/55365/3902/30009/865/50943/23240/6348/10875/9935/9655/55294/10221/7098/7099/3135/1840/714
BP	GO:0032611	interleukin-1 beta production	75	0.516629	2.67625	0.00124378	0.011147	0.00739296	3835	tags=65%, list=31%, signal=45%	55765/5005/5004/64581/140885/10333/834/6376/3428/8767/2950/7128/115362/114769/3965/5371/9447/353514/64127/3553/351/440068/8877/7474/10892/24145/199713/10392/149628/2150/51311/58484/4332/3458/56670/4210/19/114548/945/1236/6348/10626/384/5027/7099/841/7305/54206/6363
BP	GO:0032652	regulation of interleukin-1 production	76	0.520631	2.70585	0.00124378	0.011147	0.00739296	3835	tags=66%, list=31%, signal=46%	55765/5005/5004/64581/140885/834/301/6376/3428/8767/7850/6288/2950/7128/114769/3965/5371/9447/353514/64127/634/351/440068/8877/7474/10892/24145/199713/10392/149628/51311/84868/4332/3458/4210/114548/945/1236/6348/3586/3066/10626/384/5027/7099/338322/841/7305/54206/6363
BP	GO:0042303	molting cycle	75	0.425608	2.20474	0.00124378	0.011147	0.00739296	2667	tags=47%, list=21%, signal=37%	1001/1956/3868/22943/5743/6662/51083/135228/6615/3872/55612/10855/4851/6608/7124/80326/8549/7474/10913/25928/7042/3889/196264/60485/9355/94234/3861/3229/2252/147495/162514/8323/92344/54888/6654
BP	GO:0042633	hair cycle	75	0.425608	2.20474	0.00124378	0.011147	0.00739296	2667	tags=47%, list=21%, signal=37%	1001/1956/3868/22943/5743/6662/51083/135228/6615/3872/55612/10855/4851/6608/7124/80326/8549/7474/10913/25928/7042/3889/196264/60485/9355/94234/3861/3229/2252/147495/162514/8323/92344/54888/6654
CC	GO:0044853	plasma membrane raft	76	0.391687	2.0357	0.00124378	0.011147	0.00739296	4224	tags=63%, list=34%, signal=42%	1946/23603/5743/84830/5727/6608/7804/858/6331/3689/1139/4118/11252/3937/3037/3356/3055/3684/356/483/9472/4040/119/867/120/11149/476/6531/5740/1136/112464/949/931/161742/6404/347273/6401/925/3162/493/81930/284119/7048/1499/5594/120892/7035/481
BP	GO:0046634	regulation of alpha-beta T cell activation	76	0.493701	2.56589	0.00124378	0.011147	0.00739296	2147	tags=51%, list=17%, signal=43%	301/3570/864/8767/3592/3718/8651/3965/941/9308/3133/100/5588/11314/3659/64115/3606/29126/4860/942/3662/3566/10892/604/5788/3071/1604/10859/3594/639/54440/149233/30009/916/865/6375/940/3458/50943
BP	GO:0060333	interferon-gamma-mediated signaling pathway	75	0.537367	2.78367	0.00124378	0.011147	0.00739296	3906	tags=73%, list=31%, signal=51%	3383/4281/3459/2633/9111/2634/4261/10346/8651/3134/5371/84166/3133/3460/5771/817/7412/3106/3659/567/5724/3662/3122/9021/10437/3105/3123/3394/3055/85363/3117/3458/6772/54625/3113/10475/7294/4939/815/133060/2210/3107/8638/3127/6737/3120/3119/2209/3115/83666/3135/6672/4684/3716/10062
BP	GO:0002702	positive regulation of production of molecular mediator of immune response	72	0.429049	2.20545	0.00124533	0.011147	0.00739296	2727	tags=50%, list=22%, signal=39%	7037/51704/353091/3134/8809/64127/3553/3133/5650/972/567/3606/25818/7474/3566/10892/958/10666/91543/3569/3554/5788/10859/51744/3805/2150/2207/54440/3735/30009/6375/940/8013/114548/9188/8482
BP	GO:0032755	positive regulation of interleukin-6 production	72	0.542982	2.7911	0.00124533	0.011147	0.00739296	1669	tags=47%, list=13%, signal=41%	7097/55765/3929/136/64581/10333/3556/3570/7096/59341/8767/338382/8808/26525/3965/353514/64127/3553/2069/351/7124/64135/972/10288/64170/7474/5724/4317/3569/10392/6774/2150/2207/51311
BP	GO:0035710	CD4-positive, alpha-beta T cell activation	72	0.536615	2.75837	0.00124533	0.011147	0.00739296	2274	tags=58%, list=18%, signal=48%	301/864/8767/3592/3718/8651/3965/8809/941/9308/5588/64115/3606/29126/942/5971/3662/1880/3566/10892/5734/91543/3569/604/3071/1604/6774/3594/114836/54440/149233/6693/30009/159296/865/6375/3458/50943/60437/2529/4063/5075
BP	GO:0043534	blood vessel endothelial cell migration	74	0.407043	2.10185	0.00124688	0.011147	0.00739296	3553	tags=54%, list=29%, signal=39%	9982/301/1969/7101/3091/5578/5743/84830/284/4851/154796/2247/2113/116150/10000/958/6868/2303/5606/7114/154810/23616/6091/6997/28984/1942/8829/3688/6722/26585/2050/949/161742/5587/4627/4780/55294/9734/3162/11235
BP	GO:0002690	positive regulation of leukocyte chemotaxis	73	0.491126	2.53012	0.00124844	0.011147	0.00739296	3549	tags=63%, list=29%, signal=45%	3929/3576/1906/3570/59341/8740/3592/6278/1230/23075/1907/3965/3627/5641/284340/7941/6354/972/6352/6351/7474/2358/3569/6868/10563/3071/2150/8291/3735/6375/5880/6846/811/729230/9750/1435/57118/1236/728/6348/199/63940/5919/196527/719/79647
BP	GO:0050764	regulation of phagocytosis	73	0.521552	2.68687	0.00124844	0.011147	0.00739296	4001	tags=71%, list=32%, signal=49%	7097/722/64581/140885/3601/5806/4240/3600/6347/5873/3553/7124/11314/718/3561/717/8877/2268/1794/2358/8724/6556/961/5788/3071/10326/2150/2207/2213/8291/55423/3055/725/9474/3458/3560/811/64422/57118/10461/26228/949/197/5906/146722/196527/55646/1535/6850/3685/23208/2889
BP	GO:0070098	chemokine-mediated signaling pathway	73	0.541649	2.79039	0.00124844	0.011147	0.00739296	2972	tags=60%, list=24%, signal=46%	11240/6374/2919/6364/3576/1906/6376/2296/2921/3091/6347/6372/1230/2920/6355/3627/5197/7852/6354/6352/6362/10663/6351/6357/1234/6373/10563/6367/6369/6375/6846/6091/1238/51554/2829/4283/1233/729230/1236/1237/10803/6348/2833/10936
BP	GO:0071674	mononuclear cell migration	73	0.544029	2.80266	0.00124844	0.011147	0.00739296	3549	tags=67%, list=29%, signal=48%	4067/6364/140885/301/3570/6376/59341/3958/6278/6347/1230/6355/8792/3627/56833/5641/7124/284340/7941/6354/6352/6362/6351/2358/6357/3569/961/4856/6367/6283/6369/3735/6375/6846/5800/8600/120425/729230/1435/26585/728/6348/199/5919/23236/6361/196527/719/79647
BP	GO:0001776	leukocyte homeostasis	70	0.411958	2.09236	0.00126263	0.011147	0.00739296	2808	tags=46%, list=23%, signal=36%	5142/4067/301/3091/8740/7128/5293/124976/6372/3718/3965/10673/3559/100/972/1880/3569/6868/3071/2207/4004/159296/50943/27240/84636/729230/139818/11151/10461/6654/5896/10603
BP	GO:0001910	regulation of leukocyte mediated cytotoxicity	70	0.549823	2.79258	0.00126263	0.011147	0.00739296	3446	tags=70%, list=28%, signal=51%	3383/154064/79465/3592/80328/80329/6372/353091/5817/3965/3134/6318/634/5272/3133/3575/3106/135250/567/8807/10666/5788/10859/3805/3105/3594/2150/114836/2213/84868/3684/9437/149233/3902/6375/4068/51571/23705/7409/909/3107/56253/26228/22914/3593/8417/5027/59067/3135
BP	GO:0002431	Fc receptor mediated stimulatory signaling pathway	70	0.414305	2.10428	0.00126263	0.011147	0.00739296	2685	tags=47%, list=22%, signal=37%	4067/4651/4690/5359/7525/5336/60/10096/5295/2268/10095/10092/10666/961/5788/3071/7456/3984/2207/9844/2213/3055/919/917/10109/7409/2534/8013/2214/7454/2212/10097/5290
BP	GO:0032602	chemokine production	70	0.475986	2.41756	0.00126263	0.011147	0.00739296	3530	tags=60%, list=28%, signal=43%	6280/7097/3929/6279/136/64581/140885/3570/59341/8767/1969/3091/3574/2950/6372/3965/3553/351/7124/255231/972/3606/7474/3566/3569/6868/2150/84868/3458/1436/4210/6591/3586/199/5610/384/9655/4155/7098/7099/3162/54106
CC	GO:0035579	specific granule membrane	70	0.515292	2.6172	0.00126263	0.011147	0.00739296	3831	tags=69%, list=31%, signal=48%	5337/5912/966/6518/5329/222487/53831/634/10857/963/3689/8560/23250/23601/338339/2358/3903/961/2204/1536/10970/199675/7133/6515/79895/683/3684/64114/353189/5328/1084/945/3683/84329/221/160364/101/8514/10043/5906/196527/55754/719/121260/4973/6793/1535/3685
BP	GO:0045582	positive regulation of T cell differentiation	70	0.475279	2.41397	0.00126263	0.011147	0.00739296	3940	tags=69%, list=32%, signal=47%	301/864/8767/8876/3574/3592/8808/8651/3965/3559/941/9308/100/3575/972/10288/64115/3606/4860/942/3566/10892/604/1540/5788/3071/11006/3594/8744/54440/149233/865/3458/50943/10385/114548/5896/101/939/9840/3593/9655/3135/7535/2736/6850/6363/7048
BP	GO:1901655	cellular response to ketone	70	0.414273	2.10412	0.00126263	0.011147	0.00739296	3781	tags=54%, list=30%, signal=38%	3383/445/4478/1946/114907/6715/8837/1956/6422/54541/3371/5031/6696/5562/108/5737/196/5734/1646/9475/6663/730249/2230/2770/1244/11184/28960/54464/2706/2308/1080/231/2908/109/54331/8644/54206/8751
BP	GO:1904894	positive regulation of STAT cascade	70	0.45771	2.32473	0.00126263	0.011147	0.00739296	3443	tags=60%, list=28%, signal=44%	4067/3570/1545/3600/3976/3592/8651/4851/3815/3588/7132/7124/3575/11314/6352/3606/958/5008/3569/9021/6774/3587/149233/1437/183/3458/54625/1436/2534/55801/3059/51379/1443/3586/3066/2688/133396/3593/59067/3596/83666/231
BP	GO:0002718	regulation of cytokine production involved in immune response	71	0.477274	2.42653	0.00126743	0.011147	0.00739296	2905	tags=59%, list=23%, signal=46%	51704/3718/284/353091/3134/8809/64127/3553/3133/7124/972/11213/567/3606/7474/10892/7042/10666/91543/3569/3554/604/10225/7133/10859/3805/2150/2207/54440/3735/9474/30009/6375/50943/695/729230/8013/114548/9188/8482/3077/3586
BP	GO:0048525	negative regulation of viral process	69	0.406041	2.05543	0.00126904	0.011147	0.00739296	5594	tags=74%, list=45%, signal=41%	6590/5806/3428/5359/4057/5629/6355/5371/7124/6352/27350/6351/6732/89870/91543/10107/8724/85363/6772/51193/2219/200315/10410/286827/57379/4599/8638/6348/6737/5610/140564/60489/9830/55337/3456/8519/117854/164668/3669/8091/10318/2934/8547/4940/200316/25833/8812/3725/7538/282617/22880
BP	GO:0038094	Fc-gamma receptor signaling pathway	68	0.410759	2.07112	0.00127714	0.011147	0.00739296	2685	tags=47%, list=22%, signal=37%	4067/4651/4690/7525/5336/60/10096/26253/5295/2268/10095/338339/10092/961/5788/3071/7456/3984/2207/9844/2213/3055/919/917/10109/7409/2534/2214/7454/2212/10097/5290
BP	GO:0042100	B cell proliferation	68	0.495788	2.49985	0.00127714	0.011147	0.00739296	3919	tags=69%, list=32%, signal=48%	27242/4067/7037/57162/3574/4064/10673/100/952/3575/11314/972/1880/958/196/604/5788/3071/1493/1380/338376/2213/3635/683/54440/1503/970/23228/4332/695/115352/22806/930/959/472/84433/3586/931/973/7099/59067/3596/54106/7305/4208/3456/3446
[truncated: 6,718 more rows]
